# Supplementary material
Source: PubMed Central journal article supplement (PMC6205398)
Supplement: jci-128-98199-s051.pdf [file jci-128-98199-s051.pdf]

## Supplementary Materials:

### Activity-dependent neuroprotective protein deficiency models synaptic and developmental phenotypes of autism-like syndrome

Gal Hacoheh-Kleiman<sup>1\*</sup>, Shlomo Sragovich<sup>1\*</sup>, Gidon Karmon<sup>1</sup>, Andy Y. L. Gao<sup>2</sup>, Iris Grigg<sup>1</sup>, Metsada Pasmanik-Chor<sup>3</sup>, Albert Lee<sup>2</sup>, Vlasta Korenková<sup>4</sup>, R. Anne McKinney<sup>2</sup> and Illana Gozes<sup>1\*\*</sup>

\*Contributed equally

<sup>1</sup>The Lily and Avraham Gildor Chair for the Investigation of Growth Factors; The Elton Laboratory for Neuroendocrinology; Department of Human Molecular Genetics and Biochemistry, Sackler Faculty of Medicine, Sagol School of Neuroscience and Adams Super Center for Brain Studies, Tel Aviv University, Tel Aviv 69978, Israel; <sup>2</sup>Department of Pharmacology and Therapeutics, McGill University, Montreal, QC, H3G 0B1, Canada; <sup>3</sup>Bioinformatics Unit, George S. Wise Faculty of Life Sciences, Tel Aviv University, Tel Aviv 69978, Israel; <sup>4</sup>BIOCEV, Institute of Biotechnology CAS, Průmyslová 595, 252 50 Vestec, Czech Republic.

#### \*\*Corresponding author:

Illana Gozes, Ph.D.; Professor of Clinical Biochemistry

The Lily and Avraham Gildor Chair for the Investigation of Growth Factors

Head, the Dr. Diana and Zelman Elton (Elbaum) Laboratory for Molecular Neuroendocrinology

Sackler Faculty of Medicine, Tel Aviv University

Tel Aviv 69978, Israel, Phone : 972-3-640-7240, Fax : 972-3-640-8541

E-mail : [igozes@post.tau.ac.il](mailto:igozes@post.tau.ac.il)

Supplemental Tables:

Table S1. Detailed numbers of dendrites/slices/slides/animals used for spine quantifications.

| Region                         | Sex            | Quantification                 | Group                          | No. of animals per group       | Animal No. | No. of dendrites | No. of slices | No. of slides |     |
|--------------------------------|----------------|--------------------------------|--------------------------------|--------------------------------|------------|------------------|---------------|---------------|-----|
| Hippocampus                    | Males          | Spine Subtypes                 | <i>Adnp</i> <sup>+/+</sup>     | 4                              | 2307       | 48               | 7             | 6             |     |
|                                |                |                                |                                |                                | 2308       | 12               | 1             | 1             |     |
|                                |                |                                |                                |                                | 2320       | 11-12            | 1             | 1             |     |
|                                |                |                                |                                |                                | 2324       | 12               | 4             | 2             |     |
|                                |                |                                | <i>Adnp</i> <sup>+/+</sup> NAP | 4                              | 2310       | 34-35            | 6             | 5             |     |
|                                |                |                                |                                |                                | 2311       | 6                | 1             | 1             |     |
|                                |                |                                |                                |                                | 2313       | 8-9              | 1             | 1             |     |
|                                |                |                                |                                |                                | 2318       | 13               | 4             | 2             |     |
|                                |                |                                | <i>Adnp</i> <sup>+/-</sup>     | 4                              | 2287       | 41-42            | 5             | 4             |     |
|                                |                |                                |                                |                                | 2290       | 12               | 1             | 1             |     |
|                                |                |                                |                                |                                | 2592       | 10-11            | 4             | 2             |     |
|                                |                |                                |                                |                                | 2647       | 10               | 4             | 2             |     |
|                                |                |                                | <i>Adnp</i> <sup>+/-</sup> NAP | 4                              | 2312       | 41-42            | 5             | 5             |     |
|                                |                |                                |                                |                                | 2322       | 11               | 1             | 1             |     |
|                                |                |                                |                                |                                | 2325       | 8                | 1             | 1             |     |
|                                |                |                                |                                |                                | 2659       | 11-12            | 4             | 2             |     |
|                                |                | Shaft Synapses                 |                                | <i>Adnp</i> <sup>+/+</sup>     | 2          | ---              | 11            | ---           | --- |
|                                |                |                                |                                | <i>Adnp</i> <sup>+/+</sup> NAP | 2          | ---              | 10            | ---           | --- |
|                                |                |                                |                                | <i>Adnp</i> <sup>+/-</sup>     | 3          | ---              | 15            | ---           | --- |
|                                |                |                                |                                | <i>Adnp</i> <sup>+/-</sup> NAP | 2          | ---              | 10            | ---           | --- |
|                                | PSD95 Volume   | <i>Adnp</i> <sup>+/+</sup>     | 2                              | 2307                           | 8          | 4                | 2             |               |     |
|                                |                |                                |                                | 2308                           | 4          | 1                | 1             |               |     |
|                                |                | <i>Adnp</i> <sup>+/+</sup> NAP | 2                              | 2310                           | 6          | 3                | 2             |               |     |
|                                |                |                                |                                | 2311                           | 3          | 2                | 1             |               |     |
|                                |                | <i>Adnp</i> <sup>+/-</sup>     | 3                              | 2290                           | 4          | 1                | 1             |               |     |
|                                |                |                                |                                | 2592                           | 4          | 1                | 1             |               |     |
|                                |                |                                |                                | 2647                           | 3          | 1                | 1             |               |     |
| <i>Adnp</i> <sup>+/-</sup> NAP |                | 2                              | 2659                           | 6                              | 3          | 2                |               |               |     |
|                                |                | 2322                           | 4                              | 2                              | 1          |                  |               |               |     |
| Females                        | Spine Subtypes | <i>Adnp</i> <sup>+/+</sup>     | 4                              | 2302                           | 11-12      | 4                | 2             |               |     |
|                                |                |                                |                                | 2304                           | 12         | 4                | 2             |               |     |
|                                |                |                                |                                | 2604                           | 11         | 4                | 2             |               |     |
|                                |                |                                |                                | 2605                           | 12-13      | 4                | 2             |               |     |
|                                |                | <i>Adnp</i> <sup>+/+</sup> NAP | 4                              | 2652                           | 12         | 4                | 2             |               |     |
|                                |                |                                |                                | 2654                           | 12         | 4                | 2             |               |     |

| Region                         | Sex   | Quantification                 | Group                          | No. of animals per group | Animal No.     | No. of dendrites | No. of slices                  | No. of slides |     |    |     |     |
|--------------------------------|-------|--------------------------------|--------------------------------|--------------------------|----------------|------------------|--------------------------------|---------------|-----|----|-----|-----|
|                                |       |                                | <i>Adnp</i> <sup>+/-</sup>     | 4                        | 2296           | 13               | 4                              | 2             |     |    |     |     |
|                                |       |                                |                                |                          | 2305           | 12               | 4                              | 2             |     |    |     |     |
|                                |       |                                |                                |                          | 2326           | 12               | 4                              | 2             |     |    |     |     |
|                                |       |                                |                                |                          | 2327           | 12               | 4                              | 2             |     |    |     |     |
|                                |       |                                |                                |                          | 2328           | 10-11            | 4                              | 2             |     |    |     |     |
|                                |       |                                |                                |                          | 2491           | 10               | 4                              | 2             |     |    |     |     |
|                                |       |                                | <i>Adnp</i> <sup>+/-</sup> NAP | 4                        | 2275           | 12               | 4                              | 2             |     |    |     |     |
|                                |       |                                |                                |                          | 2276           | 8-9              | 3                              | 2             |     |    |     |     |
|                                |       |                                |                                |                          | 2277           | 12               | 4                              | 2             |     |    |     |     |
|                                |       |                                |                                |                          | 2279           | 12               | 4                              | 2             |     |    |     |     |
|                                |       |                                |                                |                          | Shaft Synapses |                  | <i>Adnp</i> <sup>+/+</sup>     | 2             | --- | 11 | --- | --- |
|                                |       |                                |                                |                          |                |                  | <i>Adnp</i> <sup>+/+</sup> NAP | 3             | --- | 26 | --- | --- |
|                                |       | <i>Adnp</i> <sup>+/-</sup>     | 3                              | ---                      |                |                  | 19                             | ---           | --- |    |     |     |
|                                |       | <i>Adnp</i> <sup>+/-</sup> NAP | 3                              | ---                      |                |                  | 19                             | ---           | --- |    |     |     |
|                                |       | PSD95 Volume                   | <i>Adnp</i> <sup>+/+</sup>     | 2                        | 2304           | 6                | 2                              | 1             |     |    |     |     |
|                                |       |                                |                                |                          | 2604           | 5                | 2                              | 1             |     |    |     |     |
|                                |       |                                | <i>Adnp</i> <sup>+/+</sup> NAP | 3                        | 2296           | 6                | 2                              | 1             |     |    |     |     |
|                                |       |                                |                                |                          | 2305           | 6                | 2                              | 1             |     |    |     |     |
|                                |       |                                |                                |                          | 2652           | 3                | 2                              | 1             |     |    |     |     |
|                                |       |                                | <i>Adnp</i> <sup>+/-</sup>     | 3                        | 2326           | 6                | 2                              | 1             |     |    |     |     |
| 2327                           | 6     |                                |                                |                          | 2              | 1                |                                |               |     |    |     |     |
| 2328                           | 6     |                                |                                |                          | 2              | 1                |                                |               |     |    |     |     |
| <i>Adnp</i> <sup>+/-</sup> NAP | 3     | 2275                           | 6                              | 2                        | 1              |                  |                                |               |     |    |     |     |
|                                |       | 2276                           | 6                              | 2                        | 1              |                  |                                |               |     |    |     |     |
|                                |       | 2277                           | 6                              | 2                        | 1              |                  |                                |               |     |    |     |     |
| Cortex                         | Males | Spine Subtypes                 | <i>Adnp</i> <sup>+/+</sup>     | 4                        | 2307           | 11-12            | 4                              | 2             |     |    |     |     |
|                                |       |                                |                                |                          | 2308           | 11               | 4                              | 2             |     |    |     |     |
|                                |       |                                |                                |                          | 2320           | 12               | 4                              | 2             |     |    |     |     |
|                                |       |                                |                                |                          | 2324           | 12               | 4                              | 2             |     |    |     |     |
|                                |       |                                | <i>Adnp</i> <sup>+/+</sup> NAP | 4                        | 2310           | 10-12            | 4                              | 2             |     |    |     |     |
|                                |       |                                |                                |                          | 2311           | 12               | 4                              | 2             |     |    |     |     |
|                                |       |                                |                                |                          | 2313           | 11               | 4                              | 2             |     |    |     |     |
|                                |       |                                |                                |                          | 2318           | 12               | 4                              | 2             |     |    |     |     |
|                                |       |                                | <i>Adnp</i> <sup>+/-</sup>     | 3                        | 2287           | 16               | 8                              | 4             |     |    |     |     |
|                                |       |                                |                                |                          | 2290           | 13               | 8                              | 4             |     |    |     |     |
|                                |       |                                |                                |                          | 2647           | 14               | 4                              | 2             |     |    |     |     |
|                                |       |                                | <i>Adnp</i> <sup>+/-</sup> NAP | 3                        | 2312           | 16               | 8                              | 4             |     |    |     |     |
| 2322                           | 12-13 | 6                              |                                |                          | 3              |                  |                                |               |     |    |     |     |
| 2325                           | 16    | 8                              |                                |                          | 4              |                  |                                |               |     |    |     |     |

| Region                         | Sex                             | Quantification                  | Group                          | No. of animals per group | Animal No.                 | No. of dendrites | No. of slices | No. of slides |   |   |
|--------------------------------|---------------------------------|---------------------------------|--------------------------------|--------------------------|----------------------------|------------------|---------------|---------------|---|---|
|                                |                                 | Shaft Synapses and PSD95 Volume | <i>Adnp</i> <sup>+/+</sup>     | 2                        | 2307                       | 11               | 4             | 2             |   |   |
|                                |                                 |                                 |                                |                          | 2308                       | 3                | 1             | 1             |   |   |
|                                |                                 |                                 | <i>Adnp</i> <sup>+/+</sup> NAP | 2                        | 2310                       | 8                | 3             | 2             |   |   |
|                                |                                 |                                 |                                |                          | 2311                       | 6                | 2             | 1             |   |   |
|                                |                                 |                                 | <i>Adnp</i> <sup>+/-</sup>     | 3                        | 2290                       | 2                | 1             | 1             |   |   |
|                                |                                 |                                 |                                |                          | 2592                       | 9                | 3             | 2             |   |   |
|                                |                                 |                                 |                                |                          | 2647                       | 3                | 1             | 1             |   |   |
|                                |                                 |                                 | <i>Adnp</i> <sup>+/-</sup> NAP | 2                        | 2659                       | 9                | 3             | 2             |   |   |
|                                |                                 |                                 |                                |                          | 2322                       | 8                | 2             | 1             |   |   |
|                                |                                 |                                 | Females                        | Spine Subtypes           | <i>Adnp</i> <sup>+/+</sup> | 4                | 2302          | 11            | 4 | 2 |
|                                |                                 |                                 |                                |                          |                            |                  | 2304          | 12            | 4 | 2 |
|                                |                                 |                                 |                                |                          |                            |                  | 2604          | 12            | 4 | 2 |
|                                | 2605                            | 12                              |                                |                          |                            |                  | 4             | 2             |   |   |
|                                | <i>Adnp</i> <sup>+/+</sup> NAP  | 4                               |                                |                          | 2296                       | 12               | 4             | 2             |   |   |
|                                |                                 |                                 |                                |                          | 2305                       | 12               | 4             | 2             |   |   |
|                                |                                 |                                 |                                |                          | 2652                       | 12               | 4             | 2             |   |   |
|                                |                                 |                                 |                                |                          | 2654                       | 13               | 4             | 2             |   |   |
|                                | <i>Adnp</i> <sup>+/-</sup>      | 4                               |                                |                          | 2326                       | 13               | 4             | 2             |   |   |
|                                |                                 |                                 |                                |                          | 2327                       | 12               | 4             | 2             |   |   |
|                                |                                 |                                 |                                |                          | 2328                       | 11               | 4             | 2             |   |   |
|                                |                                 |                                 |                                |                          | 2491                       | 11               | 4             | 2             |   |   |
|                                | <i>Adnp</i> <sup>+/-</sup> NAP  | 4                               |                                | 2275                     | 12                         | 4                | 2             |               |   |   |
|                                |                                 |                                 |                                | 2276                     | 13                         | 4                | 2             |               |   |   |
|                                |                                 |                                 |                                | 2277                     | 12                         | 4                | 2             |               |   |   |
|                                |                                 |                                 |                                | 2279                     | 12                         | 4                | 2             |               |   |   |
|                                | Shaft Synapses and PSD95 Volume | <i>Adnp</i> <sup>+/+</sup>      |                                | 3                        | 2302                       | 6                | 2             | 1             |   |   |
|                                |                                 |                                 |                                |                          | 2304                       | 6                | 2             | 1             |   |   |
|                                |                                 |                                 |                                |                          | 2604                       | 6                | 2             | 1             |   |   |
|                                |                                 | <i>Adnp</i> <sup>+/+</sup> NAP  |                                | 3                        | 2296                       | 6                | 2             | 1             |   |   |
|                                |                                 |                                 |                                |                          | 2305                       | 6                | 2             | 1             |   |   |
|                                |                                 |                                 |                                |                          | 2652                       | 6                | 2             | 1             |   |   |
|                                |                                 | <i>Adnp</i> <sup>+/-</sup>      |                                | 3                        | 2326                       | 6                | 2             | 1             |   |   |
| 2327                           |                                 |                                 |                                |                          | 6                          | 2                | 1             |               |   |   |
| 2328                           |                                 |                                 | 6                              |                          | 2                          | 1                |               |               |   |   |
| <i>Adnp</i> <sup>+/-</sup> NAP |                                 | 3                               | 2275                           | 6                        | 2                          | 1                |               |               |   |   |
|                                |                                 |                                 | 2276                           | 5-6                      | 2                          | 1                |               |               |   |   |
|                                |                                 |                                 | 2277                           | 6                        | 2                          | 1                |               |               |   |   |

**Table S2. Spine subtype density comparisons between males and females, as well as hippocampal and cortical areas.**

| <b>Females vs. Males<br/>Brain Area</b> | <b>Spine Subtype Density</b> | <i>Adnp</i> <sup>+/+</sup> | <i>Adnp</i> <sup>+/+</sup> NAP | <i>Adnp</i> <sup>+/-</sup> | <i>Adnp</i> <sup>+/-</sup> NAP |
|-----------------------------------------|------------------------------|----------------------------|--------------------------------|----------------------------|--------------------------------|
| <b>Hippocampus</b>                      | <b>Total</b>                 | <b>n.s.</b>                | <b>0.00049916</b> ↑            | <b>0.002698</b> ↑          | <b>1.89E-10</b> ↑              |
|                                         | Shaft Synapses               | n.s.                       | n.s.                           | 4.58825E-05 ↓              | 0.01544 ↓                      |
|                                         | Mushroom                     | n.s.                       | n.s.                           | 0.001611 ↑                 | n.s.                           |
|                                         | Stubby                       | 0.040139541 ↑              | 4.83289E-05 ↑                  | 0.008237 ↑                 | 2.35E-09 ↑                     |
|                                         | Thin                         | n.s.                       | 0.00045322 ↑                   | n.s.                       | 5.7589E-05 ↑                   |
|                                         | PSD95 volume                 | 8.15679E-11 ↑              | 5.45787E-10 ↑                  | 1.17052E-07 ↑              | 1.66201E-05 ↑                  |
| <b>Cortex</b>                           | <b>Total</b>                 | <b>0.00357202</b> ↓        | <b>n.s.</b>                    | <b>n.s.</b>                | <b>2.27E-06</b> ↓              |
|                                         | Shaft Synapses               | 0.014012318 ↑              | n.s.                           | n.s.                       | n.s.                           |
|                                         | Mushroom                     | 0.014781439 ↓              | n.s.                           | n.s.                       | 1.59E-06 ↓                     |
|                                         | Stubby                       | n.s.                       | 0.001033409 ↑                  | n.s.                       | 0.037241 ↓                     |
|                                         | Thin                         | n.s.                       | n.s.                           | n.s.                       | n.s.                           |
|                                         | PSD95 volume                 | 0.001425 ↓                 | n.s.                           | n.s.                       | n.s.                           |
| <b>Hippocampus vs. Cortex<br/>Sex</b>   | <b>Spine Subtype Density</b> | <i>Adnp</i> <sup>+/+</sup> | <i>Adnp</i> <sup>+/+</sup> NAP | <i>Adnp</i> <sup>+/-</sup> | <i>Adnp</i> <sup>+/-</sup> NAP |
| <b>Males</b>                            | <b>Total</b>                 | <b>0.000216502</b> ↓       | <b>2.05038E-05</b> ↓           | <b>n.s.</b>                | <b>7.9183E-16</b> ↓            |
|                                         | Shaft Synapses               | 2.37583E-06 ↑              | 0.0003957 ↑                    | 2.06962E-08 ↑              | 0.000503707 ↑                  |
|                                         | Mushroom                     | 7.36659E-05 ↓              | 0.003854881 ↓                  | 0.036597539 ↓              | 2.78691E-12 ↓                  |
|                                         | Stubby                       | n.s.                       | n.s.                           | 0.033028365 ↓              | 1.32393E-07 ↓                  |
|                                         | Thin                         | n.s.                       | 0.004285311 ↓                  | 0.000347728 ↑              | n.s.                           |
|                                         | PSD95 volume                 | 0.004030141 ↓              | n.s.                           | n.s.                       | n.s.                           |
| <b>Females</b>                          | <b>Total</b>                 | <b>n.s.</b>                | <b>0.030723242</b> ↓           | <b>n.s.</b>                | <b>0.034265918</b> ↑           |
|                                         | Shaft Synapses               | 0.000172024 ↑              | 1.75813E-07 ↑                  | 1.60686E-05 ↑              | 0.000122605 ↑                  |
|                                         | Mushroom                     | 0.000292588 ↓              | 6.24211E-07 ↓                  | n.s.                       | 0.00575343 ↓                   |
|                                         | Stubby                       | 0.035190002 ↑              | n.s.                           | n.s.                       | 0.016674454 ↑                  |
|                                         | Thin                         | 0.014067183 ↑              | 0.021815908 ↑                  | n.s.                       | 0.000215039 ↑                  |
|                                         | PSD95 volume                 | 3.22775E-12 ↑              | 1.76748E-10 ↑                  | 3.5506E-11 ↑               | 5.36068E-09 ↑                  |

Table S2 depicts p-values for significant differences found for **total spines** and spine subtype densities when comparing males and females within the same brain area, as well as when comparing hippocampal and cortical areas within the same sex. n.s. - not significant. Up- or down-arrows represent increased or decreased density/volume in males vs. females or hippocampus vs. cortex.

**Table S3. List of genes analyzed in high-throughput quantitative real-time PCR.**

| Gene Symbol and Name                                            | Gene Description                                                                                                                                                                                                                                                                                                                                                                                                                                                                                                                                        | Reason of Choice                          | Accession Number                                                                                                                  | Gene ID | Sense Primer (5'->3') | Antisense Primer (5'->3') |
|-----------------------------------------------------------------|---------------------------------------------------------------------------------------------------------------------------------------------------------------------------------------------------------------------------------------------------------------------------------------------------------------------------------------------------------------------------------------------------------------------------------------------------------------------------------------------------------------------------------------------------------|-------------------------------------------|-----------------------------------------------------------------------------------------------------------------------------------|---------|-----------------------|---------------------------|
| <i>Adnp</i><br>(Activity Dependent Neuroprotective Protein)     | ADNP (Activity-Dependent Neuroprotective Protein or Activity Dependent Neuroprotector Homeobox) is a Protein Coding gene. This gene encodes a protein that is upregulated by vasoactive intestinal peptide (VIP) and may be involved in its stimulatory effect on certain tumor cells. Diseases associated with ADNP include ADNP syndrome (Helsmoortel-Van Der Aa Syndrome)/Adnp-Related Intellectual Disability within Autism Spectrum Disorder. ADNP expression is also deregulated in neurodegenerative and psychiatric diseases as well as cancer. | Autism-mutated gene                       | <a href="#">NM_001310086.1</a><br><a href="#">NM_009628.3</a><br><a href="#">NM_001310088.1</a>                                   | 11538   | ACGAAAAATCAGGACTATCGG | GGACATTCCGGAAATGACT       |
| <i>Adnp2</i><br>(Activity Dependent Neuroprotective Protein2)   | An important paralog of ADNP. May be involved in transcriptional regulation.                                                                                                                                                                                                                                                                                                                                                                                                                                                                            | Adnp's paralog                            | <a href="#">NM_175028.1</a>                                                                                                       | 22850   | TCTGGAAAGAAAGCGAGATAC | TGATATCGATGCAGGTGATT      |
| <i>Abcf3</i><br>(ATP Binding Cassette Subfamily F Member 3)     | This gene encodes a member of the ATP-binding cassette (ABC) transporter superfamily. ATP-binding cassette proteins transport various molecules across extra- and intracellular membranes. The protein encoded by this gene displays antiviral effect against flaviviruses.                                                                                                                                                                                                                                                                             | Affymetrix array                          | <a href="#">NM_013852.2</a>                                                                                                       | 27406   | GAACAGTCTCGACAGTAAATG | GTTGCTGGTCTTCAGTGTTT      |
| <i>Acvr1c</i><br>(Activin A Receptor, type IC)                  | ACVR1C is a type I receptor for the TGFβ (see MIM 190180) family of signaling molecules. Such ligands include activin and bone morphogenetic proteins (BMPs). Members of this family are involved in many processes, including embryogenesis and tissue homeostasis.                                                                                                                                                                                                                                                                                    | Affymetrix array                          | <a href="#">NM_001111030.1</a><br><a href="#">NM_001033369.3</a>                                                                  | 269275  | TTCAGTTGGAGGAGTGTGGA  | GGAGATTTGGTCGGAGTTTC      |
| <i>ApoE</i><br>(Apolipoprotein E)                               | The protein encoded by this gene is a major apoprotein of the chylomicron. It binds to a specific liver and peripheral cell receptor, and is essential for the normal catabolism of triglyceride-rich lipoprotein constituents. Among its related pathways are Transcription Role of VDR in regulation of genes involved in osteoporosis and metabolism of fat-soluble vitamins.                                                                                                                                                                        | Affymetrix array                          | <a href="#">NM_009696.4</a><br><a href="#">NM_001305819.1</a><br><a href="#">NM_001305843.1</a><br><a href="#">NM_001305844.1</a> | 11816   | ACCGTCTCTGGGATTACCT   | ATCAGTGCCGTCAGTTCTT       |
| <i>Bmp1</i><br>(Bone Morphogenetic Protein 1)                   | This gene encodes a protein that is capable of inducing formation of cartilage in vivo. Among its related pathways are GPCR Pathway and PEDF Induced Signaling.                                                                                                                                                                                                                                                                                                                                                                                         | Affymetrix array, Mouse and human RNA-seq | <a href="#">NM_009755.3</a>                                                                                                       | 12153   | TACAGCCAGGCGAGGATAT   | CTTGCTGAGTCGGGTCCTTT      |
| <i>Fpr-rs3</i><br>(Formyl Peptide Receptor, Related Sequence 3) | FPR3 (Formyl Peptide Receptor 3) is a G-protein-coupled receptor, expressed mainly by mammalian phagocytic leukocytes. FPRs are involved in antibacterial host defense and inflammation.                                                                                                                                                                                                                                                                                                                                                                | Affymetrix array                          | <a href="#">NM_008040.2</a>                                                                                                       | 14290   | GGTGACTTCTTTCATGGTTAC | ATGTGCACAATGCTGAGAAC      |
| <i>Lipa</i><br>(Lipase A, Lysosomal Acid Type)                  | This gene encodes lipase A, the lysosomal acid lipase (also known as cholesterol ester hydrolase). This enzyme functions in the lysosome to catalyze the hydrolysis of cholesteryl esters and triglycerides. Among its related pathways are Cholesterol and Sphingolipids transport / Distribution to the intracellular membrane compartments (normal and CF) and cholesterol biosynthesis I.                                                                                                                                                           | Affymetrix array                          | <a href="#">NM_001111100.1</a><br><a href="#">NM_021460.3</a>                                                                     | 16889   | GCTGCACCATAGGTTTCATA  | ACGGGAGCCAAGACTAAA        |
| <i>Masp1</i><br>(Mannan Binding Lectin Serine Peptidase 1)      | This gene encodes a serine protease that functions as a component of the lectin pathway of complement activation. The complement pathway plays an essential role in the innate and adaptive immune response.                                                                                                                                                                                                                                                                                                                                            | Affymetrix array                          | <a href="#">NM_008555.2</a>                                                                                                       | 17174   | CATGGCTGTAGATGTGGAT   | CAGTAGTAGCCACCGATGTAG     |
| <i>Msh5</i><br>(MutS Homolog 5)                                 | This gene encodes a member of the mutS family of proteins that are involved in DNA mismatch repair and meiotic recombination. This protein plays a role in promoting ionizing radiation-induced apoptosis.                                                                                                                                                                                                                                                                                                                                              | Affymetrix array                          | <a href="#">NM_013600.3</a><br><a href="#">NM_001146215.2</a>                                                                     | 17687   | CTCAAGTTCCTGAGTCAAG   | CTCACCAGATGGGTCAATAC      |
| <i>Nr4a2</i><br>(Nuclear Receptor Subfamily 4 Group A Member 2) | This gene encodes a member of the steroid-thyroid hormone-retinoid receptor superfamily and may act as a transcription factor. It is crucial for expression of a set of genes such as SLC6A3, SLC18A2, TH and DRD2 which are essential for development of mdDA neurons.                                                                                                                                                                                                                                                                                 | Affymetrix array                          | <a href="#">NM_001139509.1</a><br><a href="#">NM_013613.2</a>                                                                     | 18227   | TGGACTATTCCAGGTTCCA   | CGGTCAGGAGATCGTAGAA       |
| <i>Nts</i><br>(Neurotensin)                                     | This gene encodes a common precursor for two peptides, neuromedin N and neurotensin and may function as a neurotransmitter or a neuromodulator.                                                                                                                                                                                                                                                                                                                                                                                                         | Affymetrix array                          | <a href="#">NM_024435.2</a>                                                                                                       | 67405   | GCATACATCCAAGATCAGCA  | CGGGCTGTTACGTTATT         |
| <i>Pax6</i><br>(Paired Box 6)                                   | This gene encodes a homeobox and paired domain-containing protein that binds DNA and functions as a regulator of transcription. Activity of this protein is key in the development of neural tissues, particularly the eye. Among its related pathways                                                                                                                                                                                                                                                                                                  | Affymetrix array                          | <a href="#">NM_001244198.2</a><br><a href="#">NM_001244200.2</a><br><a href="#">NM_013627.6</a><br><a href="#">NM_001244201.2</a> | 18508   | ACCCAGTGTGTCATCAATAAA | GTCTGCCCGTTCAACAT         |

| Gene Symbol and Name                                                         | Gene Description                                                                                                                                                                                                                                                                                                         | Reason of Choice         | Accession Number                                                                                                                     | Gene ID | Sense Primer (5'->3')   | Antisense Primer (5'->3') |
|------------------------------------------------------------------------------|--------------------------------------------------------------------------------------------------------------------------------------------------------------------------------------------------------------------------------------------------------------------------------------------------------------------------|--------------------------|--------------------------------------------------------------------------------------------------------------------------------------|---------|-------------------------|---------------------------|
|                                                                              | are Incretin synthesis, secretion, and inactivation and mesodermal commitment pathway.                                                                                                                                                                                                                                   |                          | <a href="#">NM_001244202.2</a><br><a href="#">NM_001310144.1</a><br><a href="#">NM_001310145.1</a><br><a href="#">NM_001310146.1</a> |         |                         |                           |
| <i>Slc9a3</i><br>(Solute Carrier Family 9 Member A3)                         | The protein encoded by this gene is an epithelial brush border Na/H exchanger that uses an inward sodium ion gradient to expel acids from the cell. Among its related pathways are Transport of glucose and other sugars, bile salts and organic acids, metal ions and amine compounds and Collagen chain trimerization. | Affymetrix array         | <a href="#">NM_023055.2</a><br><a href="#">NM_023449.3</a>                                                                           | 105243  | GTTCAACCTGCATAGTGACAAG  | TCTGCCCATTCACCTCA         |
| <i>Tgfa</i><br>(Transforming Growth Factor Alpha)                            | Is a ligand for the epidermal growth factor receptor, which activates a signaling pathway for cell proliferation, differentiation and development. This gene has been associated with many types of cancers, and may be involved in some cases of cleft lip/palate.                                                      | Affymetrix array         | <a href="#">NM_031199.4</a>                                                                                                          | 21802   | GCAAACACTGTGAGTGGTG     | TCTTCAGACCACTGTCTCAGA     |
| <i>Tnfrsf11b</i><br>(tumor necrosis factor receptor superfamily, member 11b) | A member of the TNF receptor superfamily of proteins, which plays a role in cell survival, apoptosis, and inflammation.                                                                                                                                                                                                  | Affymetrix array         | <a href="#">NM_008764.3</a>                                                                                                          | 21937   | CATTGGCCTCCTGCTAAT      | TCACACAGGGTGACATCTATTC    |
| <i>Wfs1</i><br>(Wolframin ER Transmembrane Glycoprotein)                     | This gene encodes a transmembrane protein. Among its related pathways is protein processing in endoplasmic reticulum. Participates in the regulation of cellular Ca(2+) homeostasis, at least partly, by modulating the filling state of the endoplasmic reticulum Ca(2+) store.                                         | Affymetrix array         | <a href="#">NM_011716.2</a>                                                                                                          | 22393   | GTCAGCAGTGAATCCAAGAA    | AACAGGTTGGTGGGAATG        |
| <i>Akt1</i><br>(AKT Serine/Threonine Kinase 1)                               | AKT1 is activated by platelet-derived growth factor, relies on the PI3K pathway, and is recognized as a critical node in the pathway.                                                                                                                                                                                    | Autism-related gene      | <a href="#">NM_009652.3</a><br><a href="#">NM_001165894.1</a><br><a href="#">NM_001331107.1</a>                                      | 11651   | CTTCTATGGTGCGGAGATTG    | GAGGTTCTCCAGCTTCAGG       |
| <i>Akt3</i><br>(AKT Serine/Threonine Kinase 3)                               | AKT3 is one of 3 closely related serine/threonine-protein kinases (AKT1, AKT2 and AKT3) called the AKT kinase, and which regulate many processes including metabolism, proliferation, cell survival, growth and angiogenesis.                                                                                            | Autism-related gene      | <a href="#">NM_011785.3</a>                                                                                                          | 23797   | CGAACACTCTTTCAGATGC     | CTCCACCAAGGCGTTTAT        |
| <i>Cntnap2</i><br>(Caspr2, Contactin Associated Protein-Like 2)              | This gene encodes a member of the neurexin family which functions in the vertebrate nervous system as cell adhesion molecules and receptors.                                                                                                                                                                             | Autism-related gene      | <a href="#">NM_025771.3</a><br><a href="#">NM_001004357.2</a>                                                                        | 66797   | TCACTGGATTACGCCAG       | CCTCCAATGATAGCTGAGTTT     |
| <i>Elf4e</i><br>(Eukaryotic Translation Initiation Factor 4E)                | The protein encoded by this gene is a component of the eukaryotic translation initiation factor 4F complex. The encoded protein aids in translation initiation by recruiting ribosomes to the 5'-cap structure.                                                                                                          | Autism-related gene      | <a href="#">NM_007917.4</a><br><a href="#">NM_001313980.1</a>                                                                        | 13684   | TCTGGCTAGAGACTGCTG      | AGTCCATATTGCTATCTTATCACC  |
| <i>Foxp1</i><br>(Forkhead Box P1)                                            | This gene belongs to subfamily P of the forkhead box (FOX) transcription factor family. Forkhead box transcription factors play important roles in the regulation of tissue- and cell type-specific gene transcription during both development and adulthood.                                                            | Autism-related gene      | <a href="#">NM_053202.2</a><br><a href="#">NM_001197321.1</a><br><a href="#">NM_001197322.1</a><br><a href="#">NM_001347345.1</a>    | 108655  | GCGAGTAGAGAACGTTAAAGG   | GGAAGGGTTACCACTGATCT      |
| <i>Foxp2</i><br>(Forkhead Box P2)                                            | This gene encodes a member of the forkhead/winged-helix (FOX) family of transcription factors. It is expressed in fetal and adult brain as well as in several other organs such as the lung and gut.                                                                                                                     | Autism-related gene      | <a href="#">NM_053242.4</a><br><a href="#">NM_212435.1</a><br><a href="#">NM_001286607.1</a>                                         | 114142  | TGGATTGAATGTATGTGTGG    | CACGAAGACCTCAATGGTT       |
| <i>Mecp2</i><br>(Methyl-CpG Binding Protein 2)                               | DNA methylation is the major modification of eukaryotic genomes and plays an essential role in mammalian development. Human proteins MECP2, MBD1, MBD2, MBD3, and MBD4 comprise a family of nuclear proteins related by the presence in each of a methyl-CpG binding domain (MBD).                                       | Autism-related gene      | <a href="#">NM_001081979.2</a>                                                                                                       | 17257   | GAGGAGAGACTGGAGGAAAA    | GCTCATGCTTGCCCTTCTT       |
| <i>Mtor</i><br>(Mechanistic Target of Rapamycin)                             | The protein encoded by this gene belongs to a family of phosphatidylinositol kinase-related kinases. These kinases mediate cellular responses to stresses such as DNA damage and nutrient deprivation.                                                                                                                   | Autism-related gene      | <a href="#">NM_020009.2</a>                                                                                                          | 56717   | GTACCGGCACACATTGAAG     | CGATCATCTCGATTCAATACC     |
| <i>Nlgn1</i><br>(Neuroigin 1)                                                | This gene encodes a member of a family of neuronal cell surface proteins.                                                                                                                                                                                                                                                | Autism-related gene      | <a href="#">NM_138666.3</a><br><a href="#">NM_001163387.1</a>                                                                        | 192167  | AAACTGGTGACCCAAATCAA    | GCTGGTCTTTCTGGGAATATC     |
| <i>Nlgn2</i><br>(Neuroigin 2)                                                | This gene encodes a member of a family of neuronal cell surface proteins.                                                                                                                                                                                                                                                | Autism-related gene      | <a href="#">NM_198862.2</a>                                                                                                          | 216856  | CCTGAACGCATCACTATCTT    | CTTCTGGAACAGTCCCTCTG      |
| <i>Nlgn3</i><br>(Neuroigin 3)                                                | This gene encodes a member of a family of neuronal cell surface proteins.                                                                                                                                                                                                                                                | Autism-mutated risk gene | <a href="#">NM_172932.4</a>                                                                                                          | 245537  | GCCTCTATCTGAATGTGTATGTG | GTCTCGGATGTCTTCATCTTC     |

| Gene Symbol and Name                                                | Gene Description                                                                                                                                                                                                                                                                                                           | Reason of Choice                                     | Accession Number                                                                                | Gene ID | Sense Primer (5'->3')  | Antisense Primer (5'->3') |
|---------------------------------------------------------------------|----------------------------------------------------------------------------------------------------------------------------------------------------------------------------------------------------------------------------------------------------------------------------------------------------------------------------|------------------------------------------------------|-------------------------------------------------------------------------------------------------|---------|------------------------|---------------------------|
| <i>Shank2</i><br>(SH3 And Multiple Ankyrin Repeat Domains 2)        | This gene encodes a protein that is a member of the Shank family of synaptic proteins that may function as molecular scaffolds in the postsynaptic density of excitatory synapses.                                                                                                                                         | Autism-related gene, Human RNA-seq                   | <a href="#">NM_001081370.2</a><br><a href="#">NM_001113373.2</a>                                | 210274  | AACGTGGCCATCGAATC      | CGTACACGGAATTCACATCA      |
| <i>Shank3</i><br>(SH3 And Multiple Ankyrin Repeat Domains 3)        | This gene is a member of the Shank gene family. Shank proteins are multidomain scaffold proteins of the postsynaptic density that connect neurotransmitter receptors, ion channels, and other membrane proteins to the actin cytoskeleton and G-protein-coupled signaling pathways.                                        | Autism-related gene                                  | <a href="#">NM_021423.3</a>                                                                     | 58234   | GCAATTACAACAGCCAGACA   | TTCCCTGAATGGTACGACAT      |
| <i>Slc6a4</i><br>(Solute Carrier Family 6 Member 4)                 | This gene encodes an integral membrane protein that transports the neurotransmitter serotonin from synaptic spaces into presynaptic neurons.                                                                                                                                                                               | Autism-related gene                                  | <a href="#">NM_010484.2</a>                                                                     | 15567   | CAAAACGTCTGGCAAGGT     | TCAAGTAAAAGACAACCCCTCTC   |
| <i>Tsc1</i><br>(Tuberous Sclerosis 1)                               | This gene encodes a growth inhibitory protein thought to play a role in the stabilization of tuberlin. Mutations in this gene have been associated with tuberous sclerosis.                                                                                                                                                | Autism and vocalization related gene                 | <a href="#">NM_001289575.1</a><br><a href="#">NM_001289576.1</a><br><a href="#">NM_022887.4</a> | 64930   | CTCGAAGGTGGAAGACATTAG  | AGCTGGTGTGACACAGAATAG     |
| <i>Becn1</i><br>(Beclin 1)                                          | This gene encodes a protein that regulates autophagy, a catabolic process of degradation induced by starvation.                                                                                                                                                                                                            | Autophagy-related gene linked with Adnp              | <a href="#">NM_019584.3</a>                                                                     | 56208   | CAAATCTAAGGAGTTGCCGTT  | CTTCTTTGAACTGCTGCACAC     |
| <i>Gad1(67)</i><br>(Glutamate Decarboxylase 1)                      | This gene encodes one of several forms of glutamic acid decarboxylase, identified as a major autoantigen in insulin-dependent diabetes.                                                                                                                                                                                    | Catalyzes GABA production and associated with autism | <a href="#">NM_008077.5</a><br><a href="#">NM_001312900.1</a>                                   | 14415   | GGGAGCGGATCCTAATACT    | CCTTTGTAAGAAGCCACAGA      |
| <i>Gad2(65)</i><br>(Glutamate Decarboxylase 2)                      | This gene encodes one of several forms of glutamic acid decarboxylase, identified as a major autoantigen in insulin-dependent diabetes.                                                                                                                                                                                    | Catalyzes GABA production and associated with autism | <a href="#">NM_008078.2</a>                                                                     | 14417   | TTCGGATCTGAAGATGGCT    | CATAGAGCAGAGCGCACAG       |
| <i>Akap6</i><br>(A-Kinase Anchoring Protein 6)                      | The A-kinase anchor proteins (AKAPs) are involved in anchoring protein kinase A (PKA) to the nuclear membrane or sarcoplasmic reticulum. Among its related pathways are activation of cAMP-Dependent PKA and DAG and IP3 signaling.                                                                                        | Human RNA-seq                                        | <a href="#">NM_198111.2</a>                                                                     | 238161  | CGTCTCACAAGCAGGACTGA   | TCGTCCTCCACAGACACATC      |
| <i>Bmp4</i><br>(Bone Morphogenetic Protein 4)                       | This gene encodes a secreted ligand of the TGF-beta (transforming growth factor-beta) superfamily of proteins. Ligands of this family bind various TGF-beta receptors leading to recruitment and activation of SMAD family transcription factors that regulate gene expression.                                            | Human RNA-seq                                        | <a href="#">NM_007554.3</a><br><a href="#">NM_001316360.1</a>                                   | 12159   | ATCACGAAGAACATCTGGAGAA | CTGCTGAGGTTGAAGAGGAA      |
| <i>Aif1</i><br>(Iba1, Ionized Calcium-Binding Adapter Molecule 1)   | This gene encodes a protein that binds actin and calcium. This gene is induced by cytokines and interferon and may promote macrophage activation and growth of vascular smooth muscle cells and T-lymphocytes.                                                                                                             | Immunity-related gene                                | <a href="#">NM_019467.2</a>                                                                     | 11629   | TGAAGCCTTCAAGGTGAAGTA  | CTCCAGCATTGCTTCA          |
| <i>Ccl5</i><br>(C-C Motif Chemokine Ligand 5)                       | This gene is a member of the CC subfamily, functions as a chemoattractant for blood monocytes, memory T helper cells and eosinophils. It causes the release of histamine from basophils and activates eosinophils. Among its related pathways are peptide ligand-binding receptors and PEDF Induced Signaling.             | Immunity-related gene                                | <a href="#">NM_013653.3</a>                                                                     | 20304   | GCAGTCGTGTTTGTCACTC    | ACCTCTATCTAGCTCATCTC      |
| <i>Cd40lg</i><br>(Cluster of differentiation 40 Ligand)             | The protein encoded by this gene is expressed on the surface of T cells. It regulates B cell function by engaging CD40 on the B cell surface.                                                                                                                                                                              | Immunity-related gene                                | <a href="#">NM_011616.2</a>                                                                     | 21947   | CCAGCGAGCATGAAGATT     | TTCTCTTCGACCTTATCCA       |
| <i>Cd69</i><br>(Cluster of differentiation 69 Molecule)             | A member of the calcium dependent lectin superfamily of type II transmembrane receptors. Its Expression is induced upon activation of T lymphocytes, and may act to transmit signals in natural killer cells and platelets. Among its related pathways are Kit receptor signaling pathway and B Cell Development Pathways. | Immunity-related gene                                | <a href="#">NM_001033122.3</a>                                                                  | 12515   | GCCTTAAATGTGGCAAGTA    | TCCACTCATTCTGCAGGTAG      |
| <i>Gm-csf</i><br>(Granulocyte-macrophage colony-stimulating factor) | The protein encoded by this gene is a cytokine that controls the production, differentiation, and function of granulocytes and macrophages. Among its related pathways are RET signaling and IL-15 Signaling Pathways.                                                                                                     | Immunity-related gene                                | <a href="#">NM_009969.4</a>                                                                     | 12981   | GCCTGTCACGTTGAATGA     | AGACCCTGCTCGAATATCTTC     |



| Gene Symbol and Name                                                 | Gene Description                                                                                                                                                                                                                                                                                                                       | Reason of Choice                                                                                                     | Accession Number                                                                                                                                                                                                                        | Gene ID | Sense Primer (5'->3')    | Antisense Primer (5'->3') |
|----------------------------------------------------------------------|----------------------------------------------------------------------------------------------------------------------------------------------------------------------------------------------------------------------------------------------------------------------------------------------------------------------------------------|----------------------------------------------------------------------------------------------------------------------|-----------------------------------------------------------------------------------------------------------------------------------------------------------------------------------------------------------------------------------------|---------|--------------------------|---------------------------|
| <i>IFNG</i><br>(Interferon Gamma)                                    | This gene encodes a soluble cytokine that is a member of the type II interferon class. The encoded protein is secreted by cells of both the innate and adaptive immune systems.                                                                                                                                                        | Immunity-related gene                                                                                                | <a href="#">NM_008337.4</a>                                                                                                                                                                                                             | 15978   | GAGGAACTGGCAAAGGAT       | TCAAGACTTCAAAGAGTCTGAGG   |
| <i>Il1b</i><br>(Interleukin 1-Beta)                                  | The protein encoded by this gene is a member of the interleukin 1 cytokine family. This cytokine is an important mediator of the inflammatory response, and is involved in a variety of cellular activities, including cell proliferation, differentiation, and apoptosis.                                                             | Immunity-related gene                                                                                                | <a href="#">NM_008361.4</a>                                                                                                                                                                                                             | 16176   | GTGGCAGCTACCTGTGTCTT     | AGAGGATGGGCTCTTCTTCA      |
| <i>Il1rap1l</i><br>(Interleukin 1 Receptor Accessory Protein-like 1) | The protein encoded by this gene is a member of the interleukin-1 receptor family and is similar to the interleukin 1 accessory proteins. This gene and IL1RAPL2 are located at a region on chromosome X that is associated with X-linked non-syndromic mental retardation.                                                            | Immunity-related gene                                                                                                | <a href="#">NM_001160403.1</a>                                                                                                                                                                                                          | 331461  | CGCCTTGTGGAAGTAGAA       | TGTGGAATTCCTGATGACAC      |
| <i>Il6</i><br>(Interleukin 6)                                        | This gene encodes a cytokine that functions in inflammation and the maturation of B cells. The protein is primarily produced at sites of acute and chronic inflammation and induces a transcriptional inflammatory response through interleukin 6 receptor, alpha.                                                                     | Immunity-related gene                                                                                                | <a href="#">NM_031168.2</a><br><a href="#">NM_001314054.1</a>                                                                                                                                                                           | 16193   | GCTACCAAAGTGGATATAATCAGG | CCAGGTAGCTATGGTACTCCAG    |
| <i>Il8</i><br>(Interleukin 8)                                        | A member of the CXC chemokine family. This chemokine is one of the major mediators of the inflammatory response. It functions as a chemoattractant, and is also a potent angiogenic factor.                                                                                                                                            | Immunity-related gene                                                                                                | <a href="#">NM_011339.2</a>                                                                                                                                                                                                             | 20309   | GAAGTGATAGCAGTCCAAA      | AGGTCCTCAGGTAGGAACC       |
| <i>Il10</i><br>(Interleukin 10)                                      | A cytokine produced primarily by monocytes and to a lesser extent by lymphocytes. This cytokine has pleiotropic effects in immunoregulation and inflammation. It down-regulates the expression of Th1 cytokines, MHC class II Ags, and costimulatory molecules on macrophages.                                                         | Immunity-related gene                                                                                                | <a href="#">NM_010548.2</a>                                                                                                                                                                                                             | 16153   | GCGCTGTCATCGATTCT        | CACCTTGGTCTGGAGCTTAT      |
| <i>Il12A</i><br>(Interleukin 12A)                                    | A cytokine that acts on T and natural killer cells, and has a broad array of biological activities. This cytokine is required for the T-cell-independent induction of interferon (IFN)-gamma, and is important for the differentiation of both Th1 and Th2 cells. Among its related pathways are TRAF Pathway and Allograft rejection. | Immunity-related gene                                                                                                | <a href="#">NM_001159424.2</a><br><a href="#">NM_008351.3</a>                                                                                                                                                                           | 16159   | GTCTTTGATGATGACCCTGTG    | TCTGCTGATGGTTGTGATTCT     |
| <i>Lgals3</i><br>(lectin, galactose binding, soluble 3)              | The galectins are a family of beta-galactoside-binding proteins implicated in modulating cell-cell and cell-matrix interactions. It appears to be implicated in immune response associated with natural killer (NK) and lymphokine-activated killer (LAK) cell cytotoxicity.                                                           | Immunity-related gene                                                                                                | <a href="#">NM_001145953.1</a><br><a href="#">NM_010705.3</a>                                                                                                                                                                           | 16854   | CCAACGCAAACAGGATT        | CAATGACTCTCCTGTTGTTCTC    |
| <i>Tnfa</i><br>(Tumor Necrosis Factor Alpha)                         | A cytokine that belongs to the tumor necrosis factor (TNF) superfamily. This cytokine is mainly secreted by macrophages and is involved in the regulation of a wide spectrum of biological processes including cell proliferation, differentiation, apoptosis, lipid metabolism, and coagulation.                                      | Immunity-related gene                                                                                                | <a href="#">NM_013693.3</a><br><a href="#">NM_001278601.1</a>                                                                                                                                                                           | 21926   | CCTATGTCTCAGCCTCTTCTCAT  | GGAACTTCTCATCCCTTTGG      |
| <i>Mbp</i><br>(Myelin Basic Protein)                                 | The protein encoded is a major constituent of the myelin sheath of oligodendrocytes and Schwann cells in the nervous system. However, MBP-related transcripts are also present in the bone marrow and the immune system.                                                                                                               | MBP was previously investigated in autistic children. Also, ADNP was previously suggested to impact myelin formation | <a href="#">NM_001025251.2</a><br><a href="#">NM_001025254.2</a><br><a href="#">NM_001025255.2</a><br><a href="#">NM_001025256.2</a><br><a href="#">NM_001025258.2</a><br><a href="#">NM_001025259.2</a><br><a href="#">NM_010777.3</a> | 17196   | AAGGACTCACACACGAGAACTA   | TGTTTCGAGGTGCACAATG       |
| <i>Cacna1e</i><br>(Calcium Voltage-Gated Channel Subunit Alpha1 E)   | Voltage-dependent calcium channels are multi-subunit complexes mediating the entry of calcium ions into excitable cells, and are also involved in a variety of calcium-dependent processes, including muscle contraction, hormone or neurotransmitter release, gene expression, cell motility, cell division and cell death.           | Mouse RNA-seq                                                                                                        | <a href="#">NM_009782.3</a>                                                                                                                                                                                                             | 12290   | TTGCCAACTGCATCGT         | TGAAATATGGTTCTGTCTTCTCC   |
| <i>Cga</i><br>(Glycoprotein Hormones, Alpha Polypeptide)             | The protein encoded by this gene belongs to the glycoprotein hormones alpha chain family. Among its related pathways is the transcription role of vitamin D receptor (VDR) in regulation of genes involved in osteoporosis and amine-derived hormones.                                                                                 | Mouse RNA-seq                                                                                                        | <a href="#">NM_009889.2</a>                                                                                                                                                                                                             | 12640   | CCAGGTCCAAGAAGACAATG     | TCCCATTACTGTGGCCTTAG      |

| Gene Symbol and Name                                                         | Gene Description                                                                                                                                                                                                                                                                                                                                             | Reason of Choice | Accession Number                                              | Gene ID   | Sense Primer (5'->3')    | Antisense Primer (5'->3') |
|------------------------------------------------------------------------------|--------------------------------------------------------------------------------------------------------------------------------------------------------------------------------------------------------------------------------------------------------------------------------------------------------------------------------------------------------------|------------------|---------------------------------------------------------------|-----------|--------------------------|---------------------------|
| <i>Crb2</i><br>( <i>Crumbs 2, Cell Polarity Complex Component</i> )          | This gene encodes a member of a family of proteins that are components of the Crumbs cell polarity complex. In mammals, members of this family are thought to play a role in many cellular processes in early embryonic development.                                                                                                                         | Mouse RNA-seq    | <a href="#">NM_001163566.1</a>                                | 241324    | CGATGGAGAAGTCAAGTTGG     | TGAAACAGGGATTGGGATT       |
| <i>Ddx3y</i><br>( <i>DEAD-Box Helicase 3, Y-Linked</i> )                     | The protein encoded by this gene is a member of the DEAD-box RNA helicase family, characterized by nine conserved motifs, included the conserved Asp-Glu-Ala-Asp (DEAD) motif. These motifs are thought to be involved in ATP binding, hydrolysis, RNA binding, and in the formation of intramolecular interactions.                                         | Mouse RNA-seq    | <a href="#">NM_012008.2</a>                                   | 26900     | GAGGAAATACAGAGAGCAAAGG   | TCCATCCTGAACTGTCCTTAT     |
| <i>Defb20</i><br>( <i>Defensin Beta 119</i> )                                | This gene encodes a member of the beta subfamily of defensins.                                                                                                                                                                                                                                                                                               | Mouse RNA-seq    | <a href="#">NM_176950.3</a>                                   | 319579    | GTCTCGGGAGGATCTGAA       | GTGCACCATCTGCAAGTG        |
| <i>E230025N22Rik</i><br>( <i>Riken cDNA E230025N22 gene</i> )                | Kinesin motor domain. P-loop containing nucleoside triphosphate hydrolase.                                                                                                                                                                                                                                                                                   | Mouse RNA-seq    | <a href="#">NM_172831.2</a>                                   | 240216    | ACTCTGGGAAGTACAGGTTGTAAA | GTGGCTCGCCTTTAACCT        |
| <i>Fgf23</i><br>( <i>Fibroblast Growth Factor 23</i> )                       | This gene encodes a member of the fibroblast growth factor family of proteins, which possess broad mitogenic and cell survival activities and are involved in a variety of biological processes.                                                                                                                                                             | Mouse RNA-seq    | <a href="#">NM_022657.4</a>                                   | 64654     | CTACAGTGCCTGTGATTACA     | CTGAAGTGAAGCGATCCAA       |
| <i>Gdf15</i><br>( <i>Growth Differentiation Factor 15</i> )                  | This gene encodes a secreted ligand of the TGF-beta (transforming growth factor-beta) superfamily of proteins. Ligands of this family bind various TGF-beta receptors leading to recruitment and activation of SMAD family transcription factors that regulate gene expression.                                                                              | Mouse RNA-seq    | <a href="#">NM_011819.3</a><br><a href="#">NM_001330687.1</a> | 23886     | GAGCTACGGGGTCGCTT        | CACCTCTGGACTGAGTATCCG     |
| <i>Gm21949</i><br>( <i>IQCI-SCHIP1 Readthrough</i> )                         | This locus represents naturally occurring read-through transcription from the neighboring IQ motif containing J (IQJ) and schwannomin interacting protein 1 (SCHIP1) genes.                                                                                                                                                                                  | Mouse RNA-seq    | <a href="#">NM_001113419.2</a>                                | 100505386 | GCAGCACACCCGATTAC        | TGGTGGAGTTGGATTGTG        |
| <i>Hist1h3b</i><br>( <i>Histone Cluster 1 H3 Family Member B</i> )           | Histones are basic nuclear proteins that are responsible for the nucleosome structure of the chromosomal fiber in eukaryotes.                                                                                                                                                                                                                                | Mouse RNA-seq    | <a href="#">NM_178203.2</a>                                   | 319150    | AGCGTGTCCACCATCATGC      | TGGGTTCCAGTTGCACTT        |
| <i>Hjurp</i><br>( <i>Holliday Junction Recognition Protein</i> )             | Centromeric protein that plays a central role in the incorporation and maintenance of histone H3-like variant CENPA at centromeres.                                                                                                                                                                                                                          | Mouse RNA-seq    | <a href="#">NM_198652.2</a>                                   | 381280    | GCTGATAGCGAAGTACAACCA    | CCTTCTTCATCAGCTTTCTC      |
| <i>Hsd17b2</i><br>( <i>Hydroxysteroid 17-Beta Dehydrogenase 2</i> )          | 17β-HSD2 is involved in inactivation of androgens and estrogens, being accurately describable as "antiandrogenic" and "antiestrogenic", and is the key 17β-HSD isozyme in androgen and estrogen inactivation.                                                                                                                                                | Mouse RNA-seq    | <a href="#">NM_008290.2</a>                                   | 15486     | CAGCTCTAACCATGTTCTCAAC   | TGTGAGCCTGTGATGTTTG       |
| <i>Kdm5d</i><br>( <i>Lysine Demethylase 5D</i> )                             | This gene encodes a protein containing zinc finger domains. A short peptide derived from this protein is a minor histocompatibility antigen which can lead to graft rejection of male donor cells in a female recipient.                                                                                                                                     | Mouse RNA-seq    | <a href="#">NM_011419.3</a>                                   | 20592     | CATGGAGTGCCAGTTGTT       | CACTGCCTCAGCAAAGTTA       |
| <i>Klf1</i><br>( <i>Kruppel Like Factor 1</i> )                              | This gene encodes a hematopoietic-specific transcription factor that induces high-level expression of adult beta-globin and other erythroid genes.                                                                                                                                                                                                           | Mouse RNA-seq    | <a href="#">NM_010635.2</a>                                   | 16596     | GGACTTCCTCAAGTGGTGG      | AAGGGTCTCCGATTCA          |
| <i>Loc547349</i>                                                             | Major histocompatibility complex (MHC) class I family member. Their function is to display fragments (on cell surface) of non-self-peptides from within the cell (degradation of cytosolic proteins by the proteasome) to cytotoxic T cells.                                                                                                                 | Mouse RNA-seq    | <a href="#">NM_001025208.1</a>                                | 547349    | AGGGTGGCTCTCACACATT      | GATGTAATCTTGGCCTTCGTAAG   |
| <i>Mnda1</i><br>( <i>Myeloid Cell Nuclear Differentiation Antigen like</i> ) | The myeloid cell nuclear differentiation antigen (MNDA) is detected only in nuclei of cells of the granulocyte-monocyte lineage. Among its related pathways are apoptosis, autophagy and innate immune system response.                                                                                                                                      | Mouse RNA-seq    | <a href="#">NM_001170853.1</a>                                | 100040462 | AGATAAGCTCCACCTTCTCTGC   | GACCTTGATCTTGACGAAACTG    |
| <i>Myl2</i><br>( <i>Myosin Light Chain 2</i> )                               | This gene encodes the regulatory light chain associated with cardiac myosin beta (or slow) heavy chain. Ca <sup>+</sup> triggers the phosphorylation of regulatory light chain that in turn triggers contraction.                                                                                                                                            | Mouse RNA-seq    | <a href="#">NM_010861.4</a>                                   | 17906     | GCCCTAGGACGAGTGAA        | CCAAACATCGTGAGGAAC        |
| <i>Npvf</i><br>( <i>Neuropeptide VF Precursor</i> )                          | Neuropeptide VF precursor, also known as pro-FMRFamide-related neuropeptide VF or RFamide-related peptide precursor, is a propeptide that in mammals is encoded by the NPVF (or RPPF) gene. The NPVF gene, and thus the propeptide, are expressed in neurons in the mediobasal hypothalamus. NPVF has been found to potently inhibit gonadotropin secretion. | Mouse RNA-seq    | <a href="#">NM_021892.1</a>                                   | 60531     | AGTTGCTCTACGTCATGATCTG   | TTCCACAAACGCTCTCT         |
| <i>Olfir1347</i><br>( <i>Olfactory Receptor 1347</i> )                       | Olfactory receptors interact with odorant molecules in the nose, to initiate a neuronal response that triggers the perception of a smell.                                                                                                                                                                                                                    | Mouse RNA-seq    | <a href="#">NM_146385.1</a>                                   | 258383    | GTCACAAAGAGCTCCACAAG     | TCCACAGTCCCACGAGTA        |

| Gene Symbol and Name                                          | Gene Description                                                                                                                                                                                                                                                                                                                                                                                                                                     | Reason of Choice                            | Accession Number                                                                                | Gene ID | Sense Primer (5'->3')    | Antisense Primer (5'->3') |
|---------------------------------------------------------------|------------------------------------------------------------------------------------------------------------------------------------------------------------------------------------------------------------------------------------------------------------------------------------------------------------------------------------------------------------------------------------------------------------------------------------------------------|---------------------------------------------|-------------------------------------------------------------------------------------------------|---------|--------------------------|---------------------------|
| <i>Pax3</i><br>(Paired Box 3)                                 | This gene is a member of the paired box (PAX) family of transcription factors. May regulate cell proliferation, migration and apoptosis. Involved in neural development and myogenesis.                                                                                                                                                                                                                                                              | Mouse RNA-seq                               | <a href="#">NM_008781.4</a><br><a href="#">NM_001159520.1</a>                                   | 18505   | CTATTCCACAAGCCGTGTC      | TGCGTTCAAGGAATAGTG        |
| <i>Per1</i><br>(Period Circadian Clock 1)                     | This gene is a member of the Period family of genes and is expressed in a circadian pattern in the suprachiasmatic nucleus, the primary circadian pacemaker in the mammalian brain.                                                                                                                                                                                                                                                                  | Mouse RNA-seq                               | <a href="#">NM_011065.5</a><br><a href="#">NM_001159367.2</a>                                   | 18626   | TCTATGGCTCTACTACCCATCTC  | TCAGGACCTCCTCTGATTC       |
| <i>Sox5</i><br>(SRY-Box 5)                                    | This gene encodes a member of the SOX (SRY-related HMG-box) family of transcription factors involved in the regulation of embryonic development and in the determination of the cell fate.                                                                                                                                                                                                                                                           | Mouse RNA-seq                               | <a href="#">NM_001243163.1</a><br><a href="#">NM_001113559.2</a><br><a href="#">NM_011444.3</a> | 20678   | CCAGAAGACACTCCCAGTATT    | GCTCTCAGGAGTCCCTTTT       |
| <i>Tubb1</i><br>(Tubulin Beta 1 Class VI)                     | This gene encodes a member of the beta tubulin protein family. Beta tubulins are one of two core protein families (alpha and beta tubulins) that heterodimerize and assemble to form microtubules.                                                                                                                                                                                                                                                   | Mouse RNA-seq                               | <a href="#">NM_001080971.2</a>                                                                  | 545486  | GAAGCCTACGGTAAGAAGTATGTG | CTGTCAGGCTGAAAGAGGAC      |
| <i>Cd96</i><br>(Cluster of differentiation 96 Molecule)       | The protein encoded by this gene belongs to the immunoglobulin superfamily. It is a type I membrane protein. The protein may play a role in the adhesive interactions of activated T and NK cells during the late phase of the immune response. Among its related pathways are Immunoregulatory interactions between a Lymphoid and a non-Lymphoid cell and Natural Killer Cell Receptors: Human Target Cell - NK Cell Ligand-Receptor Interactions. | Mouse and human RNA-seq                     | <a href="#">NM_032465.2</a>                                                                     | 84544   | TGGTATCGGTATCAAAATGAAATC | CCAATGGGTTCTTGAATATACG    |
| <i>Cdh17</i><br>(Cadherin 17)                                 | This gene is a member of the cadherin superfamily, genes encoding calcium-dependent, membrane-associated glycoproteins.                                                                                                                                                                                                                                                                                                                              | Mouse and human RNA-seq                     | <a href="#">NM_019753.4</a>                                                                     | 12557   | GGCCTGACTGTGAGTTATTC     | GCGGAGCAGCACTAAATA        |
| <i>Chl1</i><br>(Cell Adhesion Molecule L1 Like)               | The protein is a member of the L1 gene family of neural cell adhesion molecules. It is a neural recognition molecule that may be involved in signal transduction pathways, may also play a role in the growth of certain cancers and in synaptic plasticity. May also play a role in regulating cell migration in nerve regeneration and cortical development.                                                                                       | Mouse and human RNA-seq                     | <a href="#">NM_007697.2</a>                                                                     | 12661   | CACCGTGGATCAAAAATTC      | CTGTTGAACGGAGAGTGGT       |
| <i>Hmx3</i><br>(H6 Family Homeobox 3)                         | HMX3 (H6 Family Homeobox 3) is a transcription factor involved in specification of neuronal cell types and which is required for inner ear and hypothalamus development. Controls semicircular canal formation in the inner ear. Also required for hypothalamic/pituitary axis of the CNS (By similarity).                                                                                                                                           | Mouse and human RNA-seq                     | <a href="#">NM_008257.3</a>                                                                     | 15373   | ACCAGAAGCCTCGGAAAA       | TCGCTCTCTCCAGAATGAT       |
| <i>My19</i><br>(Myosin Light Chain 9)                         | Myosin, a structural component of muscle, consists of two heavy chains and four light chains. The protein encoded by this gene is a myosin light chain that may regulate muscle contraction by modulating the ATPase activity of myosin heads.                                                                                                                                                                                                       | Mouse and human RNA-seq                     | <a href="#">NM_172118.1</a>                                                                     | 98932   | TGATAAGGAGGACCTGCAC      | GCCCTCCAGATACTCGTCT       |
| <i>Chat</i><br>(Choline O-Acetyltransferase)                  | This gene encodes an enzyme which catalyzes the biosynthesis of the neurotransmitter acetylcholine.                                                                                                                                                                                                                                                                                                                                                  | Neuro-transmission-related                  | <a href="#">NM_009891.2</a>                                                                     | 12647   | CTGGACAGCCAATCCATT       | GAAGCCGGTATGATGAGAAG      |
| <i>Slc17a7</i><br>(Vglut1, Solute Carrier Family 17 Member 7) | The protein encoded by this gene is a vesicle-bound, sodium-dependent phosphate transporter that is specifically expressed in the neuron-rich regions of the brain. It is preferentially associated with the membranes of synaptic vesicles and functions in glutamate transport.                                                                                                                                                                    | Neuro-transmission and vocalization related | <a href="#">NM_182993.2</a>                                                                     | 72961   | CTATGTCTATGGCAGCTTCG     | TCAATGTATTTCGGCTCCT       |
| <i>Dbn1</i><br>(Drebrin 1)                                    | The protein encoded by this gene is a cytoplasmic actin-binding protein thought to play a role in the process of neuronal growth. It is a member of the drebrin family of proteins that are developmentally regulated in the brain.                                                                                                                                                                                                                  | Synapse-related                             | <a href="#">NM_001177372.1</a><br><a href="#">NM_001177371.1</a><br><a href="#">NM_019813.4</a> | 56320   | CCTCCAGAAATCGACATCAC     | CAGTCGCCGCTACTAATCA       |
| <i>Dlg4</i><br>(Psd95, Post-Synaptic Density Protein 95)      | This gene encodes a member of the membrane-associated guanylate kinase (MAGUK) family. It heteromultimerizes with another MAGUK protein, DLG2, and is recruited into NMDA receptor and potassium channel clusters. These two MAGUK proteins may interact at postsynaptic sites to form a multimeric scaffold for the clustering of receptors, ion channels, and associated signaling proteins.                                                       | Synapse-related                             | <a href="#">NM_001109752.1</a><br><a href="#">NM_007864.3</a>                                   | 13385   | CTGTCCGGTCAATGGTGTT      | CGGCTATACTCTTCTGGTTTATAC  |
| <i>Glut</i><br>(Glial High Affinity Glutamate Transporter)    | This gene encodes a member of a high affinity glutamate transporter family. This gene functions in the termination of excitatory neurotransmission in central nervous system.                                                                                                                                                                                                                                                                        | Synapse-related                             | <a href="#">NM_148938.3</a>                                                                     | 20512   | CCTACCAAGGAAGATGTTAAG    | AGGATTGTACCCACAATGACA     |
| <i>Slc12A2</i><br>(Solute Carrier Family 12 Member 2)         | The protein encoded by this gene mediates sodium and chloride transport and reabsorption. The encoded protein is a membrane protein and is important in maintaining proper ionic balance and cell volume.                                                                                                                                                                                                                                            | Synapse-related                             | <a href="#">NM_009194.3</a>                                                                     | 20496   | CAGTCAGCCATACCCAAAG      | GAACAACACACGAACCCA        |

| Gene Symbol and Name                                                   | Gene Description                                                                                                                                                                                                                                                                                                                                                         | Reason of Choice                                     | Accession Number                                                                                                                                                                                                                                                                                                                                                                                                                                                                                                           | Gene ID | Sense Primer (5'→3')  | Antisense Primer (5'→3') |
|------------------------------------------------------------------------|--------------------------------------------------------------------------------------------------------------------------------------------------------------------------------------------------------------------------------------------------------------------------------------------------------------------------------------------------------------------------|------------------------------------------------------|----------------------------------------------------------------------------------------------------------------------------------------------------------------------------------------------------------------------------------------------------------------------------------------------------------------------------------------------------------------------------------------------------------------------------------------------------------------------------------------------------------------------------|---------|-----------------------|--------------------------|
| <i>Snap25</i><br>( <i>Synaptosome Associated Protein 25</i> )          | Synaptic vesicle membrane docking and fusion is mediated by SNAREs (soluble N-ethylmaleimide-sensitive factor attachment protein receptors) located on the vesicle membrane (v-SNAREs) and the target membrane (t-SNAREs).                                                                                                                                               | Synapse-related                                      | <a href="#">NM_001291056.1</a><br><a href="#">NM_011428.3</a>                                                                                                                                                                                                                                                                                                                                                                                                                                                              | 20614   | GGGCAATAATCAGGATGGAG  | TGTTACCCTGCGGATGAA       |
| <i>Syp</i><br>( <i>Synaptophysin</i> )                                 | This gene encodes an integral membrane protein of small synaptic vesicles in brain and endocrine cells.                                                                                                                                                                                                                                                                  | Synapse-related                                      | <a href="#">NM_009305.2</a>                                                                                                                                                                                                                                                                                                                                                                                                                                                                                                | 20977   | GTAATCTGGTCAGTGAAGCC  | GGGTGGAGACCTAGGATATG     |
| <i>Mef2c</i><br>( <i>Myocyte Enhancer Factor 2C</i> )                  | This protein may play a role in maintaining the differentiated state of muscle cells. Plays an essential role in hippocampal-dependent learning and memory by suppressing the number of excitatory synapses and thus regulating basal and evoked synaptic transmission. Crucial for normal neuronal development, distribution, and electrical activity in the neocortex. | Regulates synapse formation and vocalization         | <a href="#">NM_001347574.1</a><br><a href="#">NM_001347567.1</a><br><a href="#">NM_001347573.1</a><br><a href="#">NM_001347575.1</a><br><a href="#">NM_001347571.1</a><br><a href="#">NM_001347564.1</a><br><a href="#">NM_001347581.1</a><br><a href="#">NM_001347572.1</a><br><a href="#">NM_001347577.1</a><br><a href="#">NM_001347580.1</a><br><a href="#">NM_001347576.1</a><br><a href="#">NM_001347566.1</a><br><a href="#">NM_001347578.1</a><br><a href="#">NM_001347579.1</a><br><a href="#">NM_001170537.1</a> | 17260   | CGATGCAGACGATTCAGTAG  | GTGGAACAGCACACAATCTTT    |
| <i>Srxp2</i><br>( <i>Sushi Repeat Containing Protein, X-Linked 2</i> ) | This gene encodes a secreted protein that contains three sushi repeat motifs. The encoded protein may play a role in the development of speech and language centers in the brain. This protein may also be involved in angiogenesis.                                                                                                                                     | Regulates synapse formation and vocalization in mice | <a href="#">NM_001083895.3</a><br><a href="#">NM_026838.4</a>                                                                                                                                                                                                                                                                                                                                                                                                                                                              | 68792   | TTCCTGTGCGACGATGAT    | ACCTGAGCCTGCGTACC        |
| <i>Cadm1</i><br>( <i>Cell Adhesion Molecule 1</i> )                    | Mediates homophilic cell-cell adhesion in a Ca(2+)-independent manner. Also mediates heterophilic cell-cell adhesion with CADM3 and NECTIN3 in a Ca(2+)-independent manner. Acts as a tumor suppressor in non-small-cell lung cancer (NSCLC) cells.                                                                                                                      | Related to dendritic spines, autism and vocalization | <a href="#">NM_001310841.1</a><br><a href="#">NM_001025600.1</a><br><a href="#">NM_207676.2</a><br><a href="#">NM_018770.3</a><br><a href="#">NM_207675.2</a>                                                                                                                                                                                                                                                                                                                                                              | 54725   | ATCACAGTCCTGGTTCCTG   | CATGGCAGTACAGTTGACTTC    |
| <i>Hprt</i><br>( <i>Hypoxanthine Phosphoribosyl-transferase 1</i> )    | The protein encoded by this gene is a transferase, which plays a central role in the generation of purine nucleotides through the purine salvage pathway.                                                                                                                                                                                                                | Reference gene                                       | <a href="#">NM_013556.2</a>                                                                                                                                                                                                                                                                                                                                                                                                                                                                                                | 15452   | GGATTGAATCACGTTTGTGTC | AACTTGCGCTCATCTTAGGC     |
| <i>Gapdh</i><br>( <i>Glyceraldehyde-3-Phosphate Dehydrogenase</i> )    | The product of this gene catalyzes an important energy-yielding step in carbohydrate metabolism, the reversible oxidative phosphorylation of glyceraldehyde-3-phosphate in the presence of inorganic phosphate and nicotinamide adenine dinucleotide (NAD).                                                                                                              | Reference gene                                       | <a href="#">NM_008084.3</a>                                                                                                                                                                                                                                                                                                                                                                                                                                                                                                | 14433   | CGGGTTCCTATAAATACGGAC | TCACCATTTTGTCTACGGG      |

Part of the autism- and autophagy-related genes, as well as those chosen based on Affymetrix analyses and mouse/human RNA-seq were previously described in the following references: 2, 3, 6, 12, 13, 18, 34 (main text). Validation of the standard mRNA Assays for reliable performance at qPCR high-throughput BioMark instrument (Fluidigm). 93 standard mRNA assays were designed by us (Supplemental Table S1). Here we show the validation of assays for reliable preamplification and subsequent use for high-throughput qPCR instrument BioMark System (Fluidigm). Whole RNA samples were reverse transcribed by qScript cDNA Synthesis Kit (Quanta

Biosciences, Gaithersburg, MD, USA). cDNA samples were diluted to 10 ng RNA/ul and preamplified by iQ Supermix (Bio-Rad) (see Material and Methods). Preamplified samples were diluted 10x.

**Table S4. Validation of preamplification.**

| Gene Name    | Amplification Curve (pre-amplified)                                                 | Melting Curve (pre-amplified)                                                       | Pre-amplified sample versus non-pre-amplified sample (used for calculation of the quality of pre-amplification) | Melting curves (nonpreamplified and pre-amplified)                                    |
|--------------|-------------------------------------------------------------------------------------|-------------------------------------------------------------------------------------|-----------------------------------------------------------------------------------------------------------------|---------------------------------------------------------------------------------------|
| <i>Abcf3</i> | 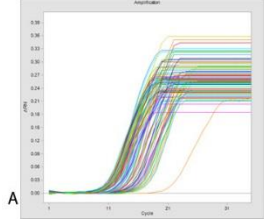   |    |                              |    |
| <i>Adnp</i>  |   |   |                             |   |
| <i>Akt1</i>  |  |  |                            |  |

| Gene Name      | Amplification Curve<br>(pre-amplified)                                              | Melting Curve<br>(pre-amplified)                                                    | Pre-amplified sample versus non-<br>pre-amplified sample<br>(used for calculation of the quality of<br>pre-amplification) | Melting curves<br>(nonpreamplified and pre-amplified)                                 |
|----------------|-------------------------------------------------------------------------------------|-------------------------------------------------------------------------------------|---------------------------------------------------------------------------------------------------------------------------|---------------------------------------------------------------------------------------|
| <i>ApoE</i>    | 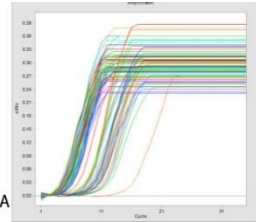   |    |                                        |    |
| <i>Bmp4</i>    |    |    |                                        |    |
| <i>Cdh17</i>   |   |   |                                       |   |
| <i>Fpr-rs3</i> |  |  |                                      |  |



Gene Name

Amplification Curve  
(pre-amplified)

Melting Curve  
(pre-amplified)

Pre-amplified sample versus non-  
pre-amplified sample  
(used for calculation of the quality of  
pre-amplification)

Melting curves  
(nonpreamplified and pre-amplified)

*Gm21949*

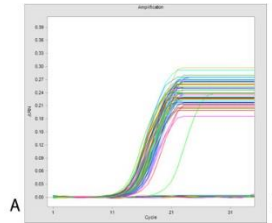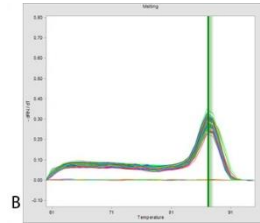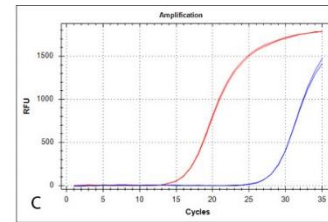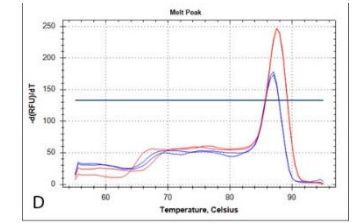

*Hist1h3b*

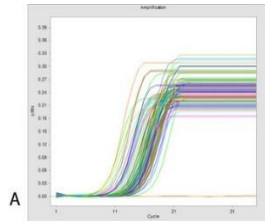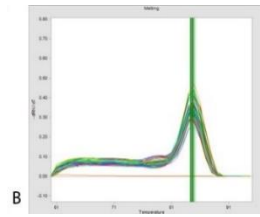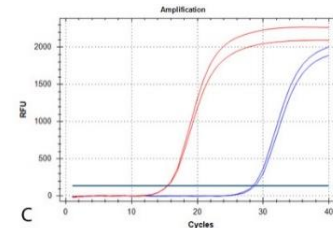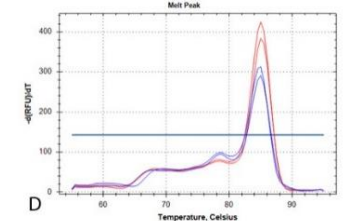

*Iba1 (Aif1)*

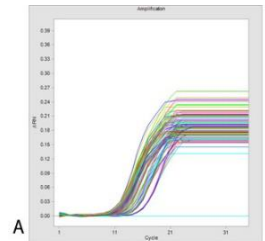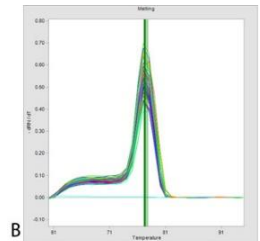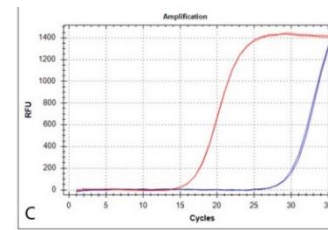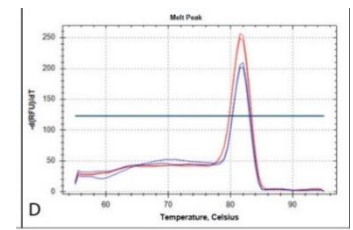

*Kdm5d*

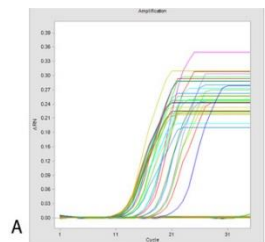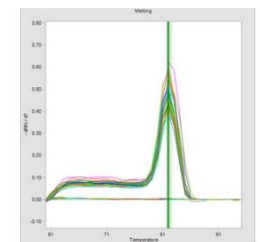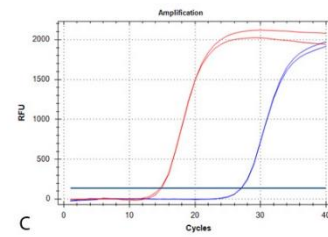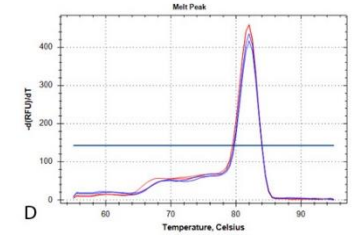

Gene Name

Amplification Curve  
(pre-amplified)

Melting Curve  
(pre-amplified)

Pre-amplified sample versus non-  
pre-amplified sample  
(used for calculation of the quality of  
pre-amplification)

Melting curves  
(nonpreamplified and pre-amplified)

*Klf1*

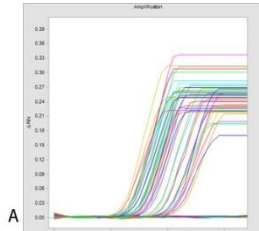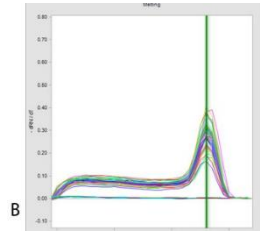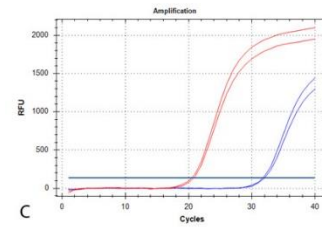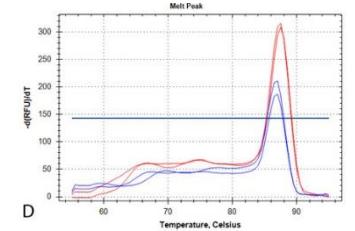

*Lipa*

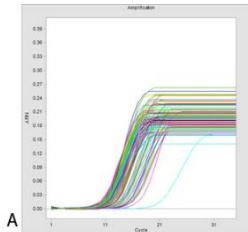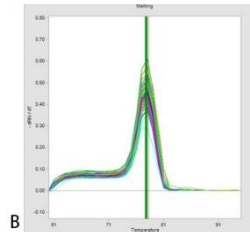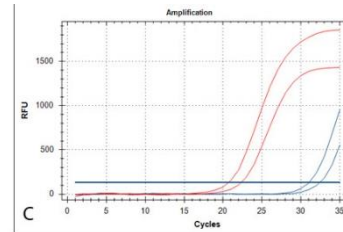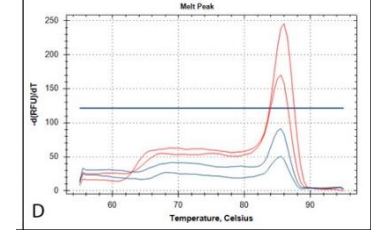

*Mtor*

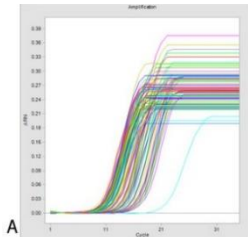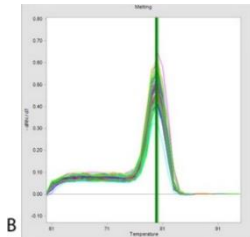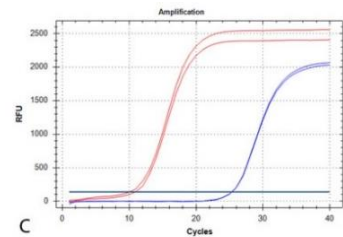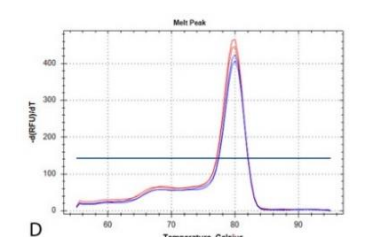

*Nlgn2*

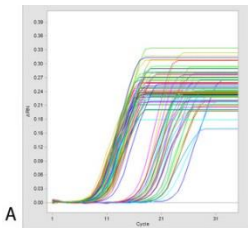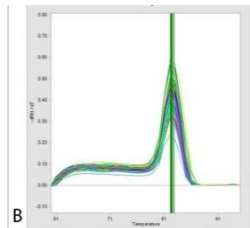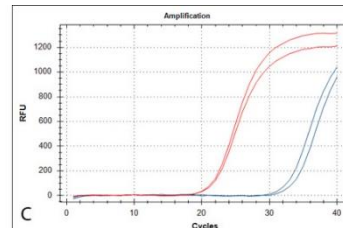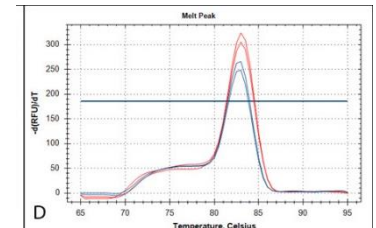



Gene Name

Amplification Curve  
(pre-amplified)

Melting Curve  
(pre-amplified)

Pre-amplified sample versus non-  
pre-amplified sample  
(used for calculation of the quality of  
pre-amplification)

Melting curves  
(nonpreamplified and pre-amplified)

*Pax6*

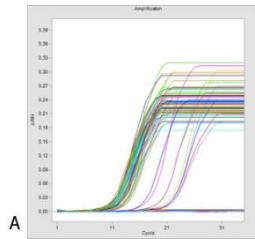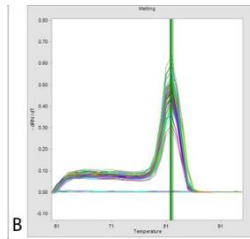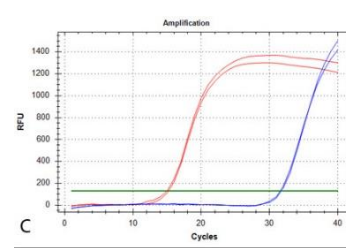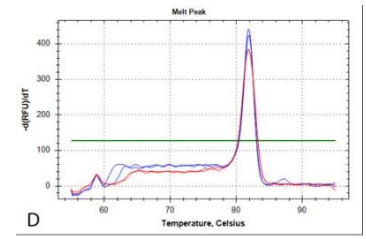

*Per1*

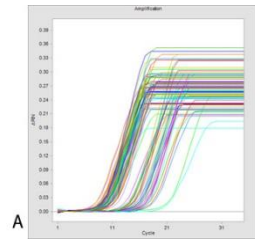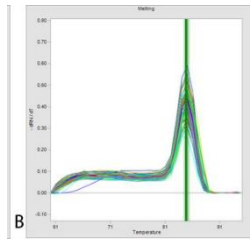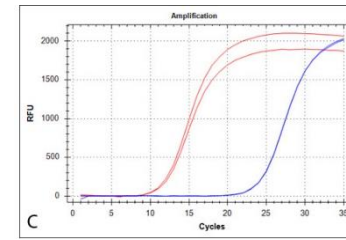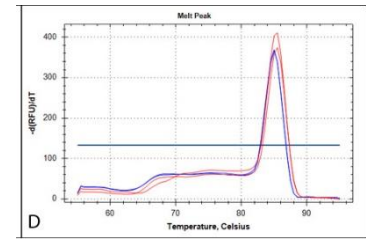

*Tubb1*

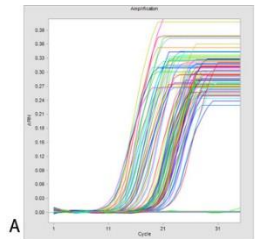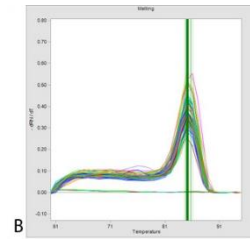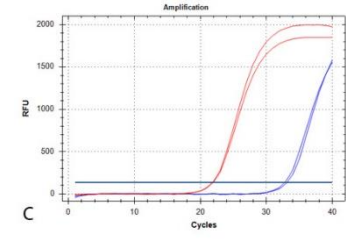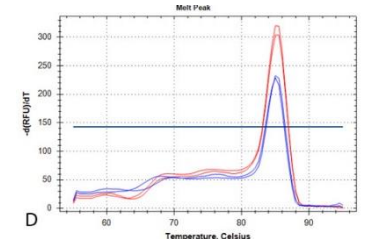

*Wfs1*

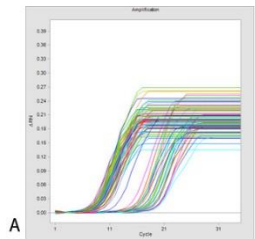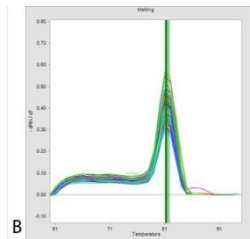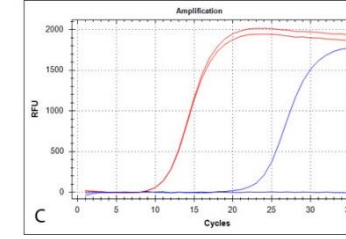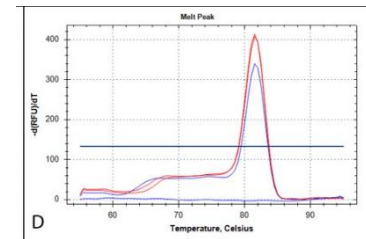

| Gene Name   | Amplification Curve<br>(pre-amplified)                                                                                                                                                                                                                                                                                                                                                                                 | Melting Curve<br>(pre-amplified)                                                                                                                                                                                                                                                                                                        | Pre-amplified sample versus non-<br>preamplified sample<br>(used for calculation of the quality of<br>pre-amplification)                                                                                                                                                                                                                                                                           | Melting curves<br>(nonpreamplified and pre-amplified)                                                                                                                                                                                                                                                                                                                                                |
|-------------|------------------------------------------------------------------------------------------------------------------------------------------------------------------------------------------------------------------------------------------------------------------------------------------------------------------------------------------------------------------------------------------------------------------------|-----------------------------------------------------------------------------------------------------------------------------------------------------------------------------------------------------------------------------------------------------------------------------------------------------------------------------------------|----------------------------------------------------------------------------------------------------------------------------------------------------------------------------------------------------------------------------------------------------------------------------------------------------------------------------------------------------------------------------------------------------|------------------------------------------------------------------------------------------------------------------------------------------------------------------------------------------------------------------------------------------------------------------------------------------------------------------------------------------------------------------------------------------------------|
| <i>Hprt</i> | 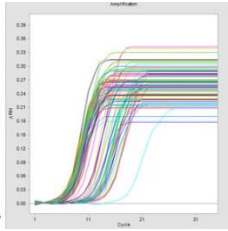 <p>A: Amplification curve for <i>Hprt</i> showing fluorescence vs cycles. The y-axis ranges from 0.00 to 0.38, and the x-axis ranges from 1 to 31 cycles. Multiple colored lines represent different samples, all showing a sigmoidal increase in fluorescence starting around cycle 10 and plateauing between cycles 15 and 25.</p> |  <p>B: Melting curve for <i>Hprt</i> showing fluorescence vs temperature. The y-axis ranges from 0.00 to 0.80, and the x-axis ranges from 60 to 85°C. Multiple colored lines show a sharp peak at approximately 78°C, indicating a single product.</p> |  <p>C: Comparison of amplification curves for pre-amplified (red) and non-pre-amplified (blue) samples. The y-axis is RFU (0 to 2000) and the x-axis is Cycles (0 to 40). The red curve shows a much earlier and steeper increase in fluorescence compared to the blue curve, indicating higher efficiency.</p> |  <p>D: Comparison of melting curves for pre-amplified (red) and non-pre-amplified (blue) samples. The y-axis is -dRFU/dT (0 to 400) and the x-axis is Temperature, Celsius (60 to 90). Both curves show a sharp peak at approximately 78°C, indicating that the products are of similar size and specificity.</p> |

Selected assays performed in 3-month-old mice for *Adnp* and all genes (including the reference gene *Hprt*) shown in Fig. 4 (main text) are presented, as an example for all tested genes. The identical pre-amplified and non-preamplified sample was used for calculation of the quality of pre-amplification for each assay (1), and non-approved assays were not included in the analysis. The validation of mRNA assays was performed at CFX96 (Bio-Rad) and the results are listed below. The 10  $\mu$ L qPCR reaction contained 2  $\mu$ L of 5 ng/ $\mu$ l cDNA sample (either nonpreamplified cDNA diluted 5x or preamplified cDNA diluted 10x), 5  $\mu$ L of Sso Fast SYBR green supermix (Bio-Rad), 0.5  $\mu$ L of forward and reverse 10  $\mu$ M primer mix (final concentration 500 nM) and 2.5  $\mu$ L of RNase free water. Thermal protocol was: 95°C 30 s, 40 cycles 95°C 5s, 60°C 15 s plus melting curve analysis.

**Table S5. Significant fold-changes of the relative gene transcript expression affected by *Adnp* haploinsufficiency, NAP treatment, or sex in cortical, hippocampal, and splenic tissues during developmental period in 19-27-day-old animals. (Tables S6 and S7 are added as an attachment with STRING functional enrichment analysis for biological processes).**

| Tissue      | Gene Symbol      | Genotype Effect<br><i>Adnp</i> <sup>+/-</sup> vs. <i>Adnp</i> <sup>+/+</sup> |         | NAP Treatment Effect<br><i>Adnp</i> <sup>+/-</sup> NAP vs. <i>Adnp</i> <sup>+/-</sup> |         | Sex Effect<br>Females vs. Males |                            |                                   |
|-------------|------------------|------------------------------------------------------------------------------|---------|---------------------------------------------------------------------------------------|---------|---------------------------------|----------------------------|-----------------------------------|
|             |                  | Males                                                                        | Females | Males                                                                                 | Females | <i>Adnp</i> <sup>+/+</sup>      | <i>Adnp</i> <sup>+/-</sup> | <i>Adnp</i> <sup>+/-</sup><br>NAP |
| Cortex      | <i>Adnp</i>      | -1.93                                                                        | -2.15   |                                                                                       |         |                                 |                            |                                   |
|             | <i>Adnp2</i>     |                                                                              |         | 1.82                                                                                  |         |                                 |                            |                                   |
|             | <i>Akt1</i>      |                                                                              |         | 1.54                                                                                  |         | 1.39                            | 1.55                       |                                   |
|             | <i>Apoe</i>      |                                                                              |         | 1.40                                                                                  |         |                                 |                            |                                   |
|             | <i>Bmp1</i>      |                                                                              |         | 1.40                                                                                  |         |                                 |                            |                                   |
|             | <i>Cacna1e</i>   |                                                                              |         | 1.85                                                                                  |         |                                 |                            |                                   |
|             | <i>Ccl5</i>      | -1.62                                                                        |         |                                                                                       |         |                                 |                            |                                   |
|             | <i>Crb2</i>      |                                                                              | 1.69    | 2.52                                                                                  |         |                                 |                            |                                   |
|             | <i>Dbn1</i>      |                                                                              |         | 1.66                                                                                  |         |                                 |                            |                                   |
|             | <i>Foxp1</i>     |                                                                              | -1.27   |                                                                                       |         |                                 |                            |                                   |
|             | <i>Gad1 (67)</i> |                                                                              |         | 2.18                                                                                  |         |                                 | 2.09                       |                                   |
|             | <i>Gdf15</i>     |                                                                              |         |                                                                                       | -3.84   |                                 |                            |                                   |
|             | <i>Gm21949</i>   |                                                                              |         | 1.58                                                                                  |         |                                 | 1.57                       |                                   |
|             | <i>Hist1h3b</i>  |                                                                              | 1.81    |                                                                                       |         |                                 | 1.71                       |                                   |
|             | <i>Mbp</i>       |                                                                              |         | 1.48                                                                                  |         |                                 |                            |                                   |
|             | <i>Mtor</i>      |                                                                              |         | 1.68                                                                                  |         |                                 | 1.64                       |                                   |
|             | <i>My12</i>      |                                                                              |         |                                                                                       |         |                                 |                            | -4.30                             |
|             | <i>My19</i>      |                                                                              |         | 1.30                                                                                  |         |                                 |                            |                                   |
|             | <i>Nlgn1</i>     |                                                                              | -1.50   |                                                                                       |         |                                 |                            |                                   |
|             | <i>Nlgn2</i>     |                                                                              |         | 1.76                                                                                  |         |                                 |                            |                                   |
|             | <i>Nlgn3</i>     |                                                                              |         | 1.57                                                                                  |         |                                 |                            |                                   |
|             | <i>Per1</i>      |                                                                              |         | 1.68                                                                                  |         |                                 |                            |                                   |
|             | <i>Psd95</i>     |                                                                              |         |                                                                                       |         |                                 | 1.72                       |                                   |
|             | <i>Shank2</i>    |                                                                              |         | 1.53                                                                                  |         |                                 | 1.57                       |                                   |
|             | <i>Shank3</i>    |                                                                              |         | 1.84                                                                                  |         |                                 |                            |                                   |
|             | <i>Slc9a3</i>    |                                                                              |         | 1.61                                                                                  |         |                                 |                            |                                   |
| <i>Sox5</i> |                  |                                                                              | 1.40    |                                                                                       |         | 1.46                            |                            |                                   |
| <i>Syp</i>  |                  |                                                                              | 2.24    |                                                                                       |         |                                 |                            |                                   |
| <i>Tgfa</i> |                  |                                                                              | 1.72    |                                                                                       |         | 1.82                            |                            |                                   |
| <i>Tsc1</i> |                  |                                                                              | 1.77    |                                                                                       |         |                                 |                            |                                   |

| Tissue          | Gene Symbol      | Genotype Effect<br><i>Adnp</i> <sup>+/-</sup> vs. <i>Adnp</i> <sup>+/+</sup> |         | NAP Treatment Effect<br><i>Adnp</i> <sup>+/-</sup> NAP vs. <i>Adnp</i> <sup>+/-</sup> |         | Sex Effect<br>Females vs. Males |                            |                                   |
|-----------------|------------------|------------------------------------------------------------------------------|---------|---------------------------------------------------------------------------------------|---------|---------------------------------|----------------------------|-----------------------------------|
|                 |                  | Males                                                                        | Females | Males                                                                                 | Females | <i>Adnp</i> <sup>+/+</sup>      | <i>Adnp</i> <sup>+/-</sup> | <i>Adnp</i> <sup>+/-</sup><br>NAP |
|                 | <i>Vglut1</i>    |                                                                              |         | 1.62                                                                                  |         |                                 |                            |                                   |
| Hippocampus     | <i>Abcf3</i>     |                                                                              |         |                                                                                       |         |                                 |                            | -1.17                             |
|                 | <i>Adnp</i>      |                                                                              | -1.86   |                                                                                       |         |                                 |                            |                                   |
|                 | <i>Akt1</i>      |                                                                              |         |                                                                                       |         |                                 |                            | -1.24                             |
|                 | <i>Ccl5</i>      |                                                                              |         |                                                                                       | -1.82   |                                 | 1.65                       | -1.47                             |
|                 | <i>Fpr-rs3</i>   | -2.05                                                                        |         | 1.92                                                                                  |         |                                 |                            |                                   |
|                 | <i>Gdf15</i>     |                                                                              |         | 3.13                                                                                  |         |                                 |                            | -1.98                             |
|                 | <i>Hjurp</i>     |                                                                              |         |                                                                                       |         |                                 |                            | -1.23                             |
|                 | <i>Il-12a</i>    | 1.62                                                                         |         |                                                                                       |         |                                 |                            |                                   |
|                 | <i>Il1-r8</i>    |                                                                              |         |                                                                                       | -1.29   |                                 |                            |                                   |
|                 | <i>Loc547349</i> |                                                                              |         | 5.27                                                                                  |         |                                 |                            |                                   |
|                 | <i>Mndal</i>     |                                                                              |         | 1.69                                                                                  |         |                                 |                            |                                   |
|                 | <i>Msh5</i>      |                                                                              |         |                                                                                       | 3.82    |                                 |                            |                                   |
|                 | <i>Nlgn2</i>     |                                                                              |         |                                                                                       |         |                                 |                            | -1.27                             |
|                 | <i>Nlgn3</i>     |                                                                              |         |                                                                                       |         |                                 |                            | -1.23                             |
|                 | <i>Npvf</i>      | 4.77                                                                         |         |                                                                                       |         |                                 | 10.95                      |                                   |
|                 | <i>Nr4a2</i>     |                                                                              |         |                                                                                       |         |                                 |                            | -1.49                             |
| <i>Olfr1347</i> | -2.17            |                                                                              |         |                                                                                       |         |                                 |                            |                                   |
| <i>Tnfa</i>     | 2.60             | 2.89                                                                         | 1.84    |                                                                                       |         |                                 | -2.36                      |                                   |
| <i>Tubb1</i>    |                  | 2.47                                                                         |         | -3.16                                                                                 |         |                                 |                            |                                   |
| Spleen          | <i>Adnp</i>      |                                                                              | -2.89   |                                                                                       | 1.91    |                                 | -1.79                      |                                   |
|                 | <i>Adnp2</i>     | 2.66                                                                         |         |                                                                                       |         |                                 | -2.58                      |                                   |
|                 | <i>ApoE</i>      |                                                                              |         |                                                                                       | 1.71    |                                 |                            | 2.91                              |
|                 | <i>Bmp4</i>      |                                                                              |         |                                                                                       | 3.86    |                                 |                            |                                   |
|                 | <i>Ccl5</i>      |                                                                              | 1.98    |                                                                                       |         |                                 |                            |                                   |
|                 | <i>Cd96</i>      |                                                                              |         |                                                                                       |         |                                 | 2.49                       | 3.29                              |
|                 | <i>Cd154</i>     |                                                                              |         |                                                                                       |         | 2.46                            |                            |                                   |
|                 | <i>Eif4e</i>     |                                                                              |         |                                                                                       | 1.91    |                                 |                            |                                   |
|                 | <i>Foxp1</i>     |                                                                              |         |                                                                                       |         |                                 |                            | 2.05                              |
| <i>Mef2c</i>    |                  |                                                                              |         |                                                                                       | 1.58    |                                 |                            |                                   |

Unpaired student's t-tests between vehicle-treated *Adnp*<sup>+/+</sup> and *Adnp*<sup>+/-</sup> mice, between NAP- and vehicle-treated *Adnp*<sup>+/-</sup> mice, and between male and female mice (males: *Adnp*<sup>+/+</sup> N=5; *Adnp*<sup>+/-</sup> N=5; *Adnp*<sup>+/-</sup> NAP, N=5, females: *Adnp*<sup>+/+</sup> N=6; *Adnp*<sup>+/-</sup> N=4; *Adnp*<sup>+/-</sup>

NAP, N=5) were performed. Statistically significant genotype, treatment, and sex effects are presented as fold-changes of the level of relative gene expression. Upregulated genes are presented as plus fold changes, whereas downregulated genes are presented as minus values. Yellow-highlighted genes indicate significant gene expression differences observed in both *Adnp* haploinsufficient model and NAP treatment. Green-highlights indicate significant gene expression differences observed in more than one tissue. Tables S6 and S7 (excel sheets) depict mouse and human functional enrichment analyses (STRING functional enrichment tool, performed on the transcripts listed in Table S5).

**Table S8. Significant fold-changes of the relative gene transcript expression affected by ADNP haploinsufficiency, NAP treatment, or sex, in cortical, hippocampal, and splenic tissues in 3-month-old animals.** (Tables S9 and S10 are added as an attachment with STRING functional enrichment analysis for biological processes).

| Tissue         | Gene Symbol     | Genotype Effect<br><i>Adnp</i> <sup>+/-</sup> vs. <i>Adnp</i> <sup>+/+</sup> |         | NAP Treatment Effect<br><i>Adnp</i> <sup>+/-</sup> NAP vs. <i>Adnp</i> <sup>+/-</sup> |         | Sex Effect<br>Females vs. Males |                            |                                   |
|----------------|-----------------|------------------------------------------------------------------------------|---------|---------------------------------------------------------------------------------------|---------|---------------------------------|----------------------------|-----------------------------------|
|                |                 | Males                                                                        | Females | Males                                                                                 | Females | <i>Adnp</i> <sup>+/+</sup>      | <i>Adnp</i> <sup>+/-</sup> | <i>Adnp</i> <sup>+/-</sup><br>NAP |
| Cortex         | <i>Adnp</i>     |                                                                              | -1.57   |                                                                                       |         |                                 |                            |                                   |
|                | <i>Akt3</i>     |                                                                              |         |                                                                                       | 1.35    |                                 |                            |                                   |
|                | <i>Cd96</i>     |                                                                              |         |                                                                                       |         |                                 |                            | 3.34                              |
|                | <i>Foxp1</i>    |                                                                              |         |                                                                                       | -1.26   |                                 |                            |                                   |
|                | <i>Fpr-rs3</i>  |                                                                              | -2.54   |                                                                                       |         |                                 |                            |                                   |
|                | <i>Hist1h3b</i> |                                                                              | -1.43   |                                                                                       | 1.91    |                                 |                            |                                   |
|                | <i>Hsd17b2</i>  |                                                                              |         |                                                                                       | 1.46    |                                 |                            | 1.65                              |
|                | <i>Iba1</i>     |                                                                              |         |                                                                                       |         |                                 | 1.25                       |                                   |
|                | <i>Il-6</i>     | 3.69                                                                         |         |                                                                                       |         | 2.38                            | -1.88                      |                                   |
|                | <i>Mecp2</i>    |                                                                              |         |                                                                                       |         |                                 | -1.26                      |                                   |
|                | <i>Mtor</i>     | 1.45                                                                         |         |                                                                                       |         |                                 |                            |                                   |
|                | <i>Myl9</i>     |                                                                              | 1.30    |                                                                                       |         | -1.37                           |                            |                                   |
|                | <i>Nts</i>      |                                                                              | -1.27   |                                                                                       |         |                                 |                            |                                   |
|                | <i>Shank2</i>   | 1.39                                                                         |         |                                                                                       |         |                                 |                            |                                   |
| <i>Slc12a2</i> | 1.45            |                                                                              |         |                                                                                       |         |                                 |                            |                                   |
| <i>Tubb1</i>   |                 |                                                                              |         | 3.24                                                                                  |         |                                 |                            |                                   |
| Hippocampus    | <i>Acvr1c</i>   | 2.01                                                                         |         |                                                                                       |         |                                 |                            |                                   |
|                | <i>Adnp</i>     |                                                                              |         | -1.35                                                                                 |         |                                 |                            |                                   |
|                | <i>Akap6</i>    | 1.69                                                                         |         |                                                                                       |         |                                 |                            |                                   |
|                | <i>Akt3</i>     |                                                                              |         |                                                                                       |         |                                 | -1.60                      |                                   |
|                | <i>ApoE</i>     | 1.63                                                                         |         | -1.48                                                                                 |         |                                 |                            |                                   |
|                | <i>Caspr2</i>   |                                                                              |         | -1.58                                                                                 |         |                                 |                            |                                   |
|                | <i>Chat</i>     |                                                                              |         |                                                                                       | 6.55    |                                 |                            | 5.84                              |
|                | <i>Chl1</i>     |                                                                              |         | -1.70                                                                                 |         |                                 |                            |                                   |
|                | <i>Crb2</i>     |                                                                              |         | -1.82                                                                                 |         |                                 |                            |                                   |
|                | <i>Dbn1</i>     | 1.89                                                                         |         |                                                                                       |         |                                 |                            |                                   |
|                | <i>Foxp1</i>    | 1.72                                                                         |         |                                                                                       |         |                                 |                            |                                   |
|                | <i>Foxp2</i>    |                                                                              | 3.25    |                                                                                       |         |                                 |                            |                                   |
|                | <i>Fpr-rs3</i>  |                                                                              |         |                                                                                       |         |                                 | 2.89                       |                                   |
| <i>Gdf15</i>   |                 |                                                                              |         | 3.70                                                                                  | 3.81    |                                 |                            |                                   |

| Tissue       | Gene Symbol     | Genotype Effect<br><i>Adnp</i> <sup>+/-</sup> vs. <i>Adnp</i> <sup>+/+</sup> |         | NAP Treatment Effect<br><i>Adnp</i> <sup>+/-</sup> NAP vs. <i>Adnp</i> <sup>+/-</sup> |         | Sex Effect<br>Females vs. Males |                            |                                   |
|--------------|-----------------|------------------------------------------------------------------------------|---------|---------------------------------------------------------------------------------------|---------|---------------------------------|----------------------------|-----------------------------------|
|              |                 | Males                                                                        | Females | Males                                                                                 | Females | <i>Adnp</i> <sup>+/+</sup>      | <i>Adnp</i> <sup>+/-</sup> | <i>Adnp</i> <sup>+/-</sup><br>NAP |
|              | <i>Gm21949</i>  | 2.12                                                                         |         | -1.83                                                                                 |         |                                 |                            |                                   |
|              | <i>Hist1h3b</i> | 1.92                                                                         |         |                                                                                       | 1.83    |                                 |                            |                                   |
|              | <i>Hsd17b2</i>  | 2.22                                                                         |         |                                                                                       |         |                                 |                            |                                   |
|              | <i>Lipa</i>     | 1.99                                                                         |         | -1.65                                                                                 |         |                                 |                            |                                   |
|              | <i>Mac-2</i>    |                                                                              |         |                                                                                       |         |                                 | -1.60                      |                                   |
|              | <i>Mef2C</i>    |                                                                              |         |                                                                                       |         |                                 |                            | -1.74                             |
|              | <i>Mndal</i>    | 2.16                                                                         |         |                                                                                       |         | 2.33                            |                            |                                   |
|              | <i>Nts</i>      |                                                                              |         |                                                                                       |         |                                 |                            | 1.73                              |
|              | <i>Nlgn2</i>    | 2.01                                                                         |         | -1.95                                                                                 |         |                                 |                            |                                   |
|              | <i>Nlgn3</i>    |                                                                              |         | -1.83                                                                                 |         |                                 |                            |                                   |
|              | <i>Nr4a2</i>    | 1.84                                                                         |         |                                                                                       |         |                                 | -2.00                      |                                   |
|              | <i>Olfrl347</i> | 3.62                                                                         |         |                                                                                       |         |                                 |                            |                                   |
|              | <i>Pax6</i>     | 1.99                                                                         |         | -2.21                                                                                 |         |                                 |                            |                                   |
|              | <i>Psd95</i>    |                                                                              |         | -2.59                                                                                 |         |                                 |                            |                                   |
|              | <i>Shank3</i>   |                                                                              |         | -2.00                                                                                 |         |                                 |                            |                                   |
|              | <i>Slc6a4</i>   |                                                                              |         |                                                                                       | -2.53   |                                 |                            |                                   |
|              | <i>Snap25</i>   |                                                                              |         |                                                                                       |         |                                 | -1.44                      |                                   |
|              | <i>Tgfa</i>     |                                                                              |         | -1.91                                                                                 |         |                                 |                            |                                   |
|              | <i>Vglut1</i>   |                                                                              |         | -1.57                                                                                 |         |                                 |                            |                                   |
|              | <i>Wfs1</i>     | 1.75                                                                         |         | -1.95                                                                                 |         |                                 |                            |                                   |
| Spleen       | <i>Abcf3</i>    | 1.93                                                                         |         | -2.46                                                                                 |         |                                 |                            |                                   |
|              | <i>Adnp</i>     |                                                                              | 1.76    |                                                                                       |         |                                 |                            | 2.13                              |
|              | <i>Akap6</i>    |                                                                              |         |                                                                                       |         | -8.13                           |                            |                                   |
|              | <i>Akt1</i>     |                                                                              | 2.17    | -2.72                                                                                 | -1.58   |                                 |                            | 2.08                              |
|              | <i>Bmp4</i>     | 3.02                                                                         |         | -3.00                                                                                 |         |                                 |                            |                                   |
|              | <i>Ccl5</i>     |                                                                              | 1.54    |                                                                                       |         |                                 |                            | -1.61                             |
|              | <i>Cdh17</i>    | 2.87                                                                         |         | -4.25                                                                                 |         |                                 |                            | 3.93                              |
|              | <i>Ddx3y</i>    |                                                                              |         | -1.78                                                                                 |         |                                 |                            |                                   |
|              | <i>Fpr-rs3</i>  |                                                                              | 3.77    |                                                                                       |         |                                 |                            |                                   |
|              | <i>Gdf15</i>    |                                                                              | 5.87    |                                                                                       |         |                                 |                            | 3.63                              |
|              | <i>Hist1h3b</i> |                                                                              |         | -3.64                                                                                 |         |                                 |                            | 2.78                              |
|              | <i>Hjurp</i>    |                                                                              | 1.94    | -3.59                                                                                 |         |                                 |                            | 2.50                              |
|              | <i>Iba1</i>     |                                                                              | 1.52    |                                                                                       | -1.57   |                                 |                            |                                   |
|              | <i>Ifng</i>     |                                                                              | 3.18    |                                                                                       |         |                                 |                            |                                   |
|              | <i>Il1b</i>     |                                                                              |         | -1.86                                                                                 |         |                                 |                            |                                   |
| <i>Kdm5d</i> | 2.76            |                                                                              | -2.40   |                                                                                       |         |                                 |                            |                                   |

| Tissue | Gene Symbol      | Genotype Effect<br><i>Adnp</i> <sup>+/-</sup> vs. <i>Adnp</i> <sup>+/+</sup> |         | NAP Treatment Effect<br><i>Adnp</i> <sup>+/-</sup> NAP vs. <i>Adnp</i> <sup>+/-</sup> |         | Sex Effect<br>Females vs. Males |                            |                                   |
|--------|------------------|------------------------------------------------------------------------------|---------|---------------------------------------------------------------------------------------|---------|---------------------------------|----------------------------|-----------------------------------|
|        |                  | Males                                                                        | Females | Males                                                                                 | Females | <i>Adnp</i> <sup>+/+</sup>      | <i>Adnp</i> <sup>+/-</sup> | <i>Adnp</i> <sup>+/-</sup><br>NAP |
|        | <i>Klf1</i>      | 2.91                                                                         |         | -5.12                                                                                 |         |                                 |                            |                                   |
|        | <i>Mecp2</i>     |                                                                              |         |                                                                                       |         |                                 |                            | 1.91                              |
|        | <i>Mtor</i>      |                                                                              | 1.95    | -2.54                                                                                 | -1.71   |                                 |                            |                                   |
|        | <i>My19</i>      |                                                                              |         | -3.02                                                                                 |         |                                 |                            | 2.28                              |
|        | <i>Nlgn1</i>     |                                                                              | 7.09    |                                                                                       |         | -5.51                           |                            |                                   |
|        | <i>Nlgn2</i>     |                                                                              |         | -5.57                                                                                 |         |                                 |                            |                                   |
|        | <i>Olfir1347</i> |                                                                              | 3.23    |                                                                                       |         |                                 |                            | 3.23                              |
|        | <i>Per1</i>      | 2.66                                                                         |         | -2.30                                                                                 |         |                                 |                            |                                   |
|        | <i>Psd95</i>     |                                                                              |         |                                                                                       | 2.93    |                                 |                            |                                   |
|        | <i>Slc6a4</i>    |                                                                              |         | -4.57                                                                                 |         |                                 |                            | 3.68                              |
|        | <i>Sox5</i>      |                                                                              |         | -2.41                                                                                 |         |                                 |                            |                                   |
|        | <i>Tubb1</i>     |                                                                              |         |                                                                                       |         |                                 |                            | 2.76                              |
|        | <i>Wfs1</i>      |                                                                              |         | -1.72                                                                                 |         |                                 |                            |                                   |

Unpaired student's t-tests between vehicle-treated *Adnp*<sup>+/+</sup> and *Adnp*<sup>+/-</sup> mice, between NAP- and vehicle-treated *Adnp*<sup>+/-</sup> mice, and between male and female mice (males: *Adnp*<sup>+/+</sup> N=3; *Adnp*<sup>+/-</sup> N=4; *Adnp*<sup>+/-</sup> NAP, N=4, females: *Adnp*<sup>+/+</sup> N=6; *Adnp*<sup>+/-</sup> N=7; *Adnp*<sup>+/-</sup> NAP, N=8) were performed. Statistically significant genotype, treatment, and sex effects are presented as fold-changes of the level of relative gene transcript expression. Upregulated genes are presented as plus fold changes, whereas downregulated genes are presented as minus values. Yellow-highlighted genes indicate significant gene expression differences observed in both *Adnp* haploinsufficient model and NAP treatment. Green-highlights indicate significant gene expression differences observed in more than one tissue. Tables S9 and S10 (excel sheets) depict mouse and human functional enrichment analyses (STRING functional enrichment tool, performed on the genes listed in Table S8).



**Table S13. Significant fold-changes of the relative expression of gene transcripts comparing 19-27-day-old mice and 3-month-old mice.** (Tables S14 and S15 are added as an attachment with STRING functional enrichment analysis for biological processes).

| Tissue      | Gene Symbol     | Age effect (19-27-day-old vs. 3-month-old mice) |         |                            |         |                                |         |
|-------------|-----------------|-------------------------------------------------|---------|----------------------------|---------|--------------------------------|---------|
|             |                 | <i>Adnp</i> <sup>+/+</sup>                      |         | <i>Adnp</i> <sup>+/-</sup> |         | <i>Adnp</i> <sup>+/-</sup> NAP |         |
|             |                 | Males                                           | Females | Males                      | Females | Males                          | Females |
| Cortex      | <i>Acvr1c</i>   |                                                 | 1.53    | 2.01                       | 1.60    | 1.84                           |         |
|             | <i>Adnp</i>     |                                                 | -1.39   |                            |         |                                |         |
|             | <i>Adnp2</i>    |                                                 |         | 2.08                       |         |                                |         |
|             | <i>Akt1</i>     |                                                 |         | 1.61                       |         |                                |         |
|             | <i>Becn1</i>    |                                                 |         | 1.38                       |         | 1.52                           |         |
|             | <i>Bmp1</i>     |                                                 | -1.62   |                            |         |                                |         |
|             | <i>Bmp4</i>     | -1.82                                           | -1.62   | -1.44                      | -1.71   |                                |         |
|             | <i>Ccl5</i>     |                                                 |         |                            | -2.04   |                                | -1.66   |
|             | <i>Crb2</i>     | -2.21                                           |         |                            |         |                                |         |
|             | <i>Dbn1</i>     |                                                 |         | 1.80                       |         |                                |         |
|             | <i>Foxp1</i>    | -1.48                                           |         |                            |         |                                |         |
|             | <i>Fpr-rs3</i>  |                                                 |         | -6.14                      |         | -4.05                          |         |
|             | <i>Gdf15</i>    |                                                 | -4.27   | -13.19                     | -4.31   |                                |         |
|             | <i>Hist1h3b</i> |                                                 |         |                            | -2.57   |                                |         |
|             | <i>Hjrp</i>     |                                                 |         | 1.85                       |         | 2.09                           |         |
|             | <i>Hmx3</i>     |                                                 |         |                            |         |                                | -2.30   |
|             | <i>Hsd17b2</i>  |                                                 | 2.07    |                            | 3.95    |                                | 5.09    |
|             | <i>Il1b</i>     | -2.64                                           | -5.39   | -3.37                      | -4.65   | -2.81                          | -3.23   |
|             | <i>Il-6</i>     |                                                 | 3.16    | 3.92                       | 2.45    |                                |         |
|             | <i>Lipa</i>     | -1.59                                           |         |                            |         |                                |         |
|             | <i>Masp1</i>    |                                                 | -1.56   |                            | -1.35   |                                |         |
|             | <i>Mbp</i>      | -2.20                                           | -2.08   | -1.89                      | -1.89   | -1.95                          |         |
|             | <i>Mndal</i>    |                                                 | -1.66   | -2.29                      | -1.88   | -1.78                          |         |
|             | <i>Msh5</i>     |                                                 |         | -4.54                      |         | -9.06                          |         |
|             | <i>Mtor</i>     |                                                 |         | 1.63                       |         |                                |         |
|             | <i>Myl2</i>     |                                                 |         |                            |         |                                | 4.37    |
|             | <i>Nts</i>      | -2.19                                           |         |                            |         |                                |         |
|             | <i>Nlgn1</i>    |                                                 |         |                            | 1.41    | 1.59                           |         |
|             | <i>Nlgn2</i>    |                                                 |         | 1.89                       |         |                                |         |
|             | <i>Olfrl347</i> |                                                 |         | -5.85                      | -4.47   |                                |         |
| <i>Pax6</i> |                 |                                                 |         |                            | 1.51    |                                |         |
| <i>Per1</i> |                 |                                                 | 1.60    |                            |         |                                |         |

| Tissue        | Gene Symbol      | Age effect (19-27-day-old vs. 3-month-old mice) |         |                            |         |                                |         |
|---------------|------------------|-------------------------------------------------|---------|----------------------------|---------|--------------------------------|---------|
|               |                  | <i>Adnp</i> <sup>+/+</sup>                      |         | <i>Adnp</i> <sup>+/-</sup> |         | <i>Adnp</i> <sup>+/-</sup> NAP |         |
|               |                  | Males                                           | Females | Males                      | Females | Males                          | Females |
|               | <i>Psd95</i>     |                                                 |         | 2.36                       |         | 1.70                           | 2.52    |
|               | <i>Shank2</i>    |                                                 |         | 1.41                       |         |                                |         |
|               | <i>Shank3</i>    |                                                 |         | 1.74                       |         |                                |         |
|               | <i>Slc12a2</i>   | -1.86                                           | -1.60   |                            | -1.33   |                                |         |
|               | <i>Slc9a3</i>    |                                                 |         |                            | -1.54   |                                |         |
|               | <i>Snap25</i>    |                                                 | 1.38    | 1.84                       | 1.81    | 1.97                           |         |
|               | <i>Sox5</i>      |                                                 |         | 2.22                       |         | 1.77                           |         |
|               | <i>Srpx2</i>     |                                                 |         | 1.99                       |         |                                |         |
|               | <i>Tgfa</i>      |                                                 |         | 2.12                       |         |                                | 1.64    |
|               | <i>Tnfrsf11b</i> | 1.67                                            | 2.17    | 2.10                       | 1.89    | 2.63                           | 2.44    |
|               | <i>Vglut1</i>    |                                                 | -1.42   |                            | -1.45   |                                |         |
| Hippocampus   | <i>Abcf3</i>     |                                                 |         |                            |         | 1.81                           |         |
|               | <i>Adnp2</i>     |                                                 |         |                            |         | 1.80                           |         |
|               | <i>Akap6</i>     | 1.74                                            |         |                            |         | 2.36                           | 1.85    |
|               | <i>Akt1</i>      |                                                 |         |                            |         | 1.58                           |         |
|               | <i>ApoE</i>      | 1.84                                            |         |                            |         | 1.97                           | 1.47    |
|               | <i>Bmp1</i>      | 1.84                                            |         |                            |         | 1.89                           |         |
|               | <i>Bmp4</i>      | 6.27                                            | 8.23    | 3.64                       | 4.30    | 4.88                           | 4.01    |
|               | <i>Caspr2</i>    |                                                 |         |                            |         | 1.47                           |         |
|               | <i>Ccl5</i>      |                                                 | 1.68    |                            | 2.10    | 2.02                           |         |
|               | <i>Chat</i>      | 11.18                                           | 13.24   | 5.55                       |         |                                |         |
|               | <i>Chl1</i>      |                                                 |         |                            |         | 1.72                           |         |
|               | <i>Crb2</i>      |                                                 |         |                            |         | 2.78                           | 1.86    |
|               | <i>Dbn1</i>      |                                                 |         |                            |         | 2.03                           |         |
|               | <i>Eif4e</i>     |                                                 |         |                            |         |                                | -1.34   |
|               | <i>Foxp2</i>     | 4.93                                            | 8.45    | 4.43                       |         |                                |         |
|               | <i>Fpr-rs3</i>   | 4.20                                            | 3.43    | 3.89                       |         | 3.12                           |         |
|               | <i>Gad1 (67)</i> |                                                 |         |                            |         | 2.65                           | 2.05    |
|               | <i>Gdf15</i>     | 13.88                                           | 2.33    |                            |         | 3.96                           |         |
|               | <i>Glut</i>      |                                                 |         |                            |         | 2.21                           | 1.84    |
|               | <i>Gm21949</i>   | 2.34                                            |         |                            |         | 3.07                           | 1.97    |
|               | <i>Hist1h3b</i>  | 4.03                                            | 2.12    | 1.93                       | 2.56    | 2.38                           |         |
|               | <i>Hmx3</i>      |                                                 |         |                            | 6.11    |                                |         |
| <i>Il-12a</i> |                  |                                                 | -1.55   |                            |         |                                |         |
| <i>Il1b</i>   |                  | 5.13                                            |         | 4.10                       | 6.67    |                                |         |
| <i>Il-6</i>   |                  |                                                 |         | -2.09                      |         |                                |         |

| Tissue | Gene Symbol      | Age effect (19-27-day-old vs. 3-month-old mice) |         |                            |         |                                |         |
|--------|------------------|-------------------------------------------------|---------|----------------------------|---------|--------------------------------|---------|
|        |                  | <i>Adnp</i> <sup>+/+</sup>                      |         | <i>Adnp</i> <sup>+/-</sup> |         | <i>Adnp</i> <sup>+/-</sup> NAP |         |
|        |                  | Males                                           | Females | Males                      | Females | Males                          | Females |
|        | <i>Lipa</i>      | 1.81                                            |         |                            |         | 1.75                           | 1.39    |
|        | <i>Mac-2</i>     |                                                 |         | -1.97                      |         |                                |         |
|        | <i>Masp1</i>     | 1.85                                            | 2.82    |                            |         | 1.58                           |         |
|        | <i>Mbp</i>       | 2.59                                            | 3.10    | 1.58                       | 2.43    | 2.83                           | 2.32    |
|        | <i>Mecp2</i>     | 2.00                                            | 2.46    |                            | 1.81    | 2.34                           | 1.95    |
|        | <i>Mndal</i>     |                                                 |         |                            |         | 2.69                           | 2.40    |
|        | <i>Msh3</i>      |                                                 |         |                            |         | 7.97                           | 5.73    |
|        | <i>Mtor</i>      |                                                 |         |                            |         | 1.75                           |         |
|        | <i>MyI2</i>      | 2.00                                            |         |                            |         |                                |         |
|        | <i>MyI9</i>      | 1.96                                            |         |                            |         | 2.36                           | 1.74    |
|        | <i>Nts</i>       |                                                 | 1.72    |                            | 1.91    | 2.29                           |         |
|        | <i>Nlgn2</i>     |                                                 |         |                            |         | 1.81                           |         |
|        | <i>Nlgn3</i>     | 1.97                                            |         |                            |         | 2.50                           | 1.59    |
|        | <i>Olfir1347</i> | 4.38                                            | 2.39    |                            |         |                                |         |
|        | <i>Pax6</i>      |                                                 |         |                            |         | 1.98                           |         |
|        | <i>Shank2</i>    |                                                 |         |                            |         | 1.94                           | 1.67    |
|        | <i>Shank3</i>    |                                                 |         |                            |         | 2.48                           |         |
|        | <i>Slc12a2</i>   | 2.13                                            |         |                            | 1.99    | 2.16                           | 1.79    |
|        | <i>Slc9a3</i>    | 4.40                                            | 6.53    | 2.34                       | 2.86    | 7.58                           | 4.29    |
|        | <i>Snap25</i>    |                                                 |         | -1.73                      |         |                                | -1.34   |
|        | <i>Srpx2</i>     | 3.39                                            | 3.55    |                            |         |                                |         |
|        | <i>Syp</i>       | 2.73                                            |         |                            |         | 3.19                           | 1.96    |
|        | <i>Tgfa</i>      |                                                 |         |                            |         | 1.84                           |         |
|        | <i>Vglut1</i>    |                                                 |         |                            |         | 2.01                           | 1.87    |
|        | <i>Wfs1</i>      |                                                 |         |                            |         | 2.51                           |         |
| Spleen | <i>Abcf3</i>     |                                                 |         | -2.31                      | -2.63   |                                | -1.55   |
|        | <i>Adnp</i>      |                                                 | -1.91   | -4.52                      | -9.71   | -3.53                          | -4.91   |
|        | <i>Adnp2</i>     | -2.52                                           | -3.57   |                            | -3.79   |                                | -1.90   |
|        | <i>Akap6</i>     |                                                 | 3.55    |                            |         |                                |         |
|        | <i>Akt1</i>      |                                                 |         |                            | -2.73   |                                |         |
|        | <i>Akt3</i>      |                                                 |         | -2.01                      |         |                                |         |
|        | <i>ApoE</i>      |                                                 |         | -2.43                      | -2.77   | -2.77                          |         |
|        | <i>Becn1</i>     |                                                 | -2.17   | -2.22                      | -2.99   | -2.18                          | -2.72   |
|        | <i>Bmp4</i>      |                                                 |         | -2.68                      | -5.64   |                                |         |
|        | <i>Ccl5</i>      |                                                 |         |                            |         |                                | 1.79    |
|        | <i>Chat</i>      |                                                 |         |                            |         |                                | 4.22    |
|        | <i>Dbn1</i>      |                                                 |         |                            |         |                                | 1.88    |

| Tissue | Gene Symbol      | Age effect (19-27-day-old vs. 3-month-old mice) |         |                            |         |                                |         |
|--------|------------------|-------------------------------------------------|---------|----------------------------|---------|--------------------------------|---------|
|        |                  | <i>Adnp</i> <sup>+/+</sup>                      |         | <i>Adnp</i> <sup>+/-</sup> |         | <i>Adnp</i> <sup>+/-</sup> NAP |         |
|        |                  | Males                                           | Females | Males                      | Females | Males                          | Females |
|        | <i>Eif4e</i>     |                                                 | -1.30   | -1.72                      | -1.93   |                                |         |
|        | <i>Foxp1</i>     |                                                 |         |                            |         | -1.86                          |         |
|        | <i>Fpr-rs3</i>   |                                                 | 7.90    | 5.30                       |         | 9.85                           |         |
|        | <i>Gdf15</i>     | 26.14                                           | 7.47    | 6.39                       |         | 18.31                          |         |
|        | <i>Glut</i>      |                                                 |         |                            | -3.37   |                                |         |
|        | <i>Il1b</i>      |                                                 | 2.20    |                            |         | 2.19                           | 4.14    |
|        | <i>Mac-2</i>     | -3.44                                           | -1.99   | -4.14                      | -3.05   |                                | -6.05   |
|        | <i>Mecp2</i>     |                                                 |         |                            | -3.08   |                                |         |
|        | <i>Mef2c</i>     |                                                 |         |                            | -1.53   |                                |         |
|        | <i>Mndal</i>     |                                                 | 1.36    |                            |         |                                | 1.75    |
|        | <i>Msh5</i>      |                                                 |         |                            |         | 4.56                           | 7.31    |
|        | <i>Mtor</i>      |                                                 |         |                            | -2.31   |                                |         |
|        | <i>Nts</i>       |                                                 | 3.89    |                            |         |                                | 4.72    |
|        | <i>Nlgn1</i>     |                                                 | 4.52    |                            |         |                                |         |
|        | <i>Nlgn2</i>     |                                                 |         |                            | -4.37   |                                |         |
|        | <i>Olfir1347</i> |                                                 | 4.84    | 12.34                      |         | 8.09                           | 5.42    |
|        | <i>Per1</i>      |                                                 |         | -2.08                      | -4.51   |                                |         |
|        | <i>Shank3</i>    |                                                 | -3.45   | -3.71                      |         |                                |         |
|        | <i>Slc12a2</i>   |                                                 | -1.96   |                            | -1.95   |                                |         |
|        | <i>Slc9a3</i>    |                                                 | -2.06   | -3.03                      | -3.94   |                                | -3.15   |
|        | <i>Snap25</i>    | 8.07                                            |         |                            |         |                                |         |
|        | <i>Sox5</i>      |                                                 |         | -3.49                      | -4.29   |                                |         |
|        | <i>Syp</i>       |                                                 | 4.15    |                            |         | 5.57                           | 4.36    |
|        | <i>Tnfrsf11b</i> |                                                 |         |                            | -2.48   |                                |         |
|        | <i>Tubb1</i>     |                                                 |         |                            |         |                                | -2.55   |
|        | <i>Wfs1</i>      |                                                 |         | -3.13                      | -2.58   |                                |         |

Unpaired student's t-tests in vehicle-treated *Adnp*<sup>+/+</sup>, *Adnp*<sup>+/-</sup>, and NAP-treated *Adnp*<sup>+/-</sup> 19-27-day-old mice compared with 3-month-old mice (19-27-day-old mice: males: *Adnp*<sup>+/+</sup> N=5; *Adnp*<sup>+/-</sup> N=5; *Adnp*<sup>+/-</sup> NAP, N=5, females: *Adnp*<sup>+/+</sup> N=6; *Adnp*<sup>+/-</sup> N=4; *Adnp*<sup>+/-</sup> NAP, N=5. 3-month-old mice: males: *Adnp*<sup>+/+</sup> N=3; *Adnp*<sup>+/-</sup> N=4; *Adnp*<sup>+/-</sup> NAP, N=4, females: *Adnp*<sup>+/+</sup> N=6; *Adnp*<sup>+/-</sup> N=7; *Adnp*<sup>+/-</sup> NAP, N=8). Statistically significant age effect is presented as a fold-change of the level of relative gene expression for each group and sex. Upregulated genes are presented as plus fold changes, whereas downregulated genes are presented as minus values. Green-highlights

indicate significant gene expression differences observed in more than one tissue. Tables S14 and S15 (excel sheets) depict mouse and human functional enrichment analyses (STRING functional enrichment tool, performed on the genes listed in Table S13).

## Supplemental Figures:

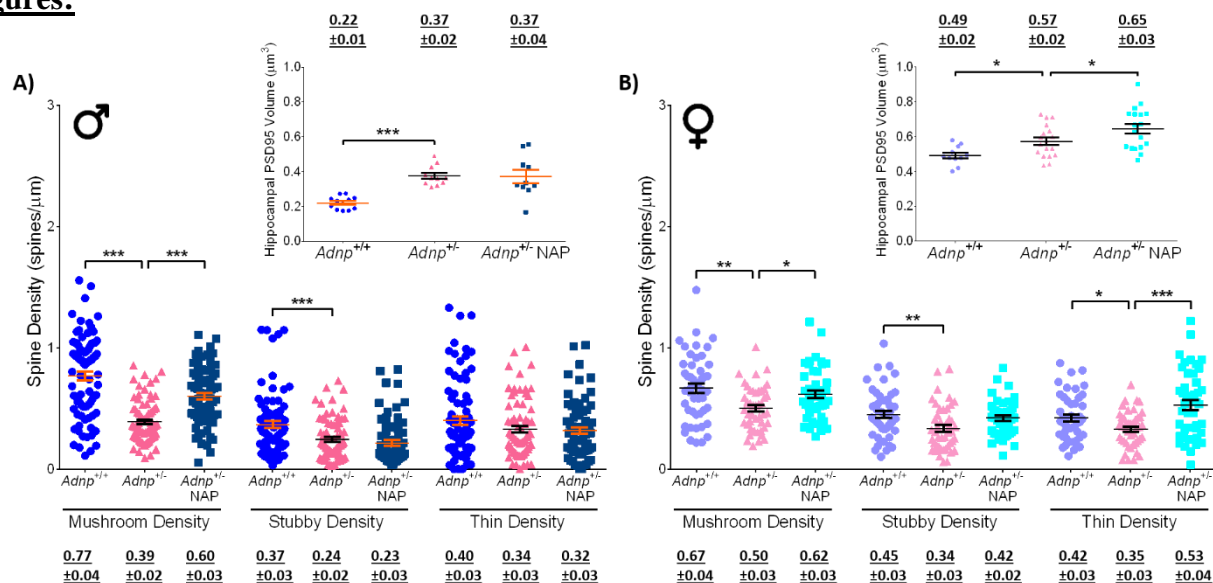

**Fig. S1. In the hippocampus, *Adnp*<sup>+/-</sup> mice display significant decreased mushroom, stubby and thin spine density, as compared to *Adnp*<sup>+/+</sup> mice, coupled with increased PSD95 volume: amelioration by NAP treatment.**

Average density of different dendritic spine subtypes (mushroom, stubby, and thin) is presented (males: *Adnp*<sup>+/+</sup> N=83-84; *Adnp*<sup>+/-</sup> N=74-75; *Adnp*<sup>+/-</sup> NAP, N=72-73, females: *Adnp*<sup>+/+</sup> N=47-48; *Adnp*<sup>+/-</sup> N=44-45; *Adnp*<sup>+/-</sup> NAP, N=44-45 dendrites/experimental group). Average hippocampal PSD95 volume (males: *Adnp*<sup>+/+</sup> N=12; *Adnp*<sup>+/-</sup> N=11; *Adnp*<sup>+/-</sup> NAP, N=10, females: *Adnp*<sup>+/+</sup> N=11; *Adnp*<sup>+/-</sup> N=18; *Adnp*<sup>+/-</sup> NAP, N=18 dendrites/experimental group) was significantly increased in *Adnp*<sup>+/-</sup> mice of both sexes, and further increased by NAP treatment in females. Two-way ANOVA with Tukey post hoc test was performed. Underlined numbers beneath and over the graphs represent mean (±SEM) values. (A) In males, for mushroom spine density, main genotype (F(1,290)=71.620, p<0.001), treatment (F(1,290)=8.474, p=0.004), and interaction (F(1,290)=17.294, p<0.001) effects were found. For stubby spine density, main genotype (F(1,289)=13.192, p<0.001) and treatment (F(1,289)=5.514, p=0.020) effects were found. For PSD95 volume (inset graph), main genotype effect was found (F(1,38)=32.485, p<0.001). Significant differences between *Adnp*<sup>+/+</sup> and *Adnp*<sup>+/-</sup> mice (\*\*\*p<0.001), and between NAP- and vehicle-treated *Adnp*<sup>+/-</sup> mice (\*\*\*p<0.001) were observed. (B) In females, for mushroom spine density, main genotype (F(1,183)=11.530, p<0.001) and treatment (F(1,183)=4.050, p=0.046) effects were found. For stubby spine density, main genotype effect was found (F(1,181)=8.627, p=0.004). For thin spine density, main treatment (F(1,181)=4.722, p=0.031) and interaction (F(1,181)=19.449, p<0.001) effects were found. For PSD95 volume (inset graph), main genotype (F(1,58)=9.322, p=0.003) and treatment (F(1,61)=9.151, p=0.004) effects were found. Significant differences between *Adnp*<sup>+/+</sup> and *Adnp*<sup>+/-</sup> mice (\*p<0.05, \*\*p<0.01), and between NAP- and vehicle-treated *Adnp*<sup>+/-</sup> mice (\*p<0.05, \*\*\*p<0.001) were observed. Scale bar: 2 μm.

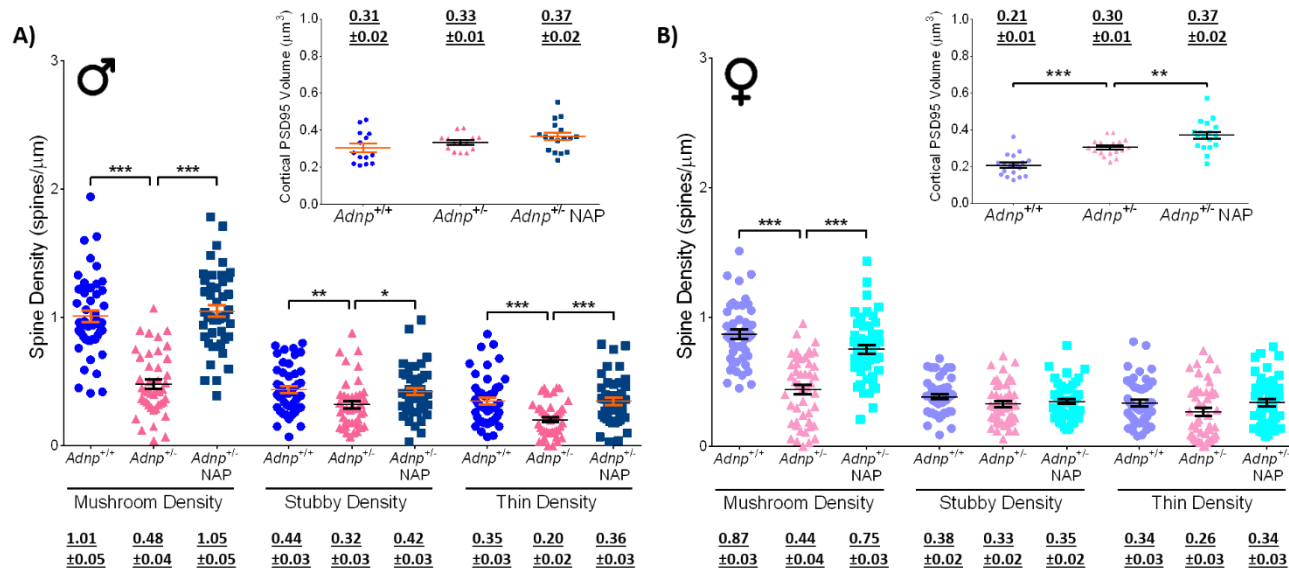

**Fig. S2. In the cortex, male *Adnp*<sup>+/-</sup> mice display significant decreased mushroom, stubby and thin spine density, whereas females present changes in mushroom density only. NAP treatment ameliorates. Female *Adnp*<sup>+/-</sup> mice also display increased PSD95 volume, further increased by NAP.**

Average density of different dendritic spine subtypes (mushroom, stubby, and thin) is presented (males: *Adnp*<sup>+/+</sup> N=46-47; *Adnp*<sup>+/-</sup> N=43; *Adnp*<sup>+/-</sup> NAP, N=44-45, females: *Adnp*<sup>+/+</sup> N=47; *Adnp*<sup>+/-</sup> N=47; *Adnp*<sup>+/-</sup> NAP, N=49 dendrites/experimental group). Average cortical PSD95 volume (males: *Adnp*<sup>+/+</sup> N=14; *Adnp*<sup>+/-</sup> N=14; *Adnp*<sup>+/-</sup> NAP, N=17, females: *Adnp*<sup>+/+</sup> N=18; *Adnp*<sup>+/-</sup> N=18; *Adnp*<sup>+/-</sup> NAP, N=18 dendrites/experimental group) was significantly increased in female *Adnp*<sup>+/-</sup> mice, and further increased by NAP treatment. Two-way ANOVA with Tukey post hoc test was performed. Underlined numbers beneath and over the graphs represent mean ( $\pm$ SEM) values. (A) In males, for mushroom spine density, main genotype ( $F(1,178)=17.707$ ,  $p<0.001$ ), treatment ( $F(1,178)=26.348$ ,  $p<0.001$ ), and interaction ( $F(1,178)=63.039$ ,  $p<0.001$ ) effects were found. For stubby spine density, main interaction effect was found ( $F(1,175)=11.172$ ,  $p=0.001$ ). For thin spine density, main genotype ( $F(1,177)=6.218$ ,  $p=0.014$ ), treatment ( $F(1,177)=5.814$ ,  $p=0.017$ ), and interaction ( $F(1,177)=8.616$ ,  $p=0.004$ ) effects were found. Significant differences between *Adnp*<sup>+/+</sup> and *Adnp*<sup>+/-</sup> mice (\*\* $p<0.01$ , \*\*\* $p<0.001$ ), and between NAP- and vehicle-treated *Adnp*<sup>+/-</sup> mice (\* $p<0.05$ , \*\*\* $p<0.001$ ) were observed. (B) In females, for mushroom spine density, main genotype ( $F(1,188)=85.518$ ,  $p<0.001$ ), treatment ( $F(1,188)=35.742$ ,  $p<0.001$ ), and interaction ( $F(1,188)=8.427$ ,  $p=0.004$ ) effects were found. For PSD95 volume (inset graph), main genotype ( $F(1,68)=37.581$ ,  $p<0.001$ ) and treatment ( $F(1,68)=21.971$ ,  $p<0.001$ ) effects were found. Significant differences between *Adnp*<sup>+/+</sup> and *Adnp*<sup>+/-</sup> mice (\*\*\* $p<0.001$ ), and between NAP- and vehicle-treated *Adnp*<sup>+/-</sup> mice (\*\* $p<0.01$ , \*\*\* $p<0.001$ ) were observed. Scale bar: 2  $\mu$ m.

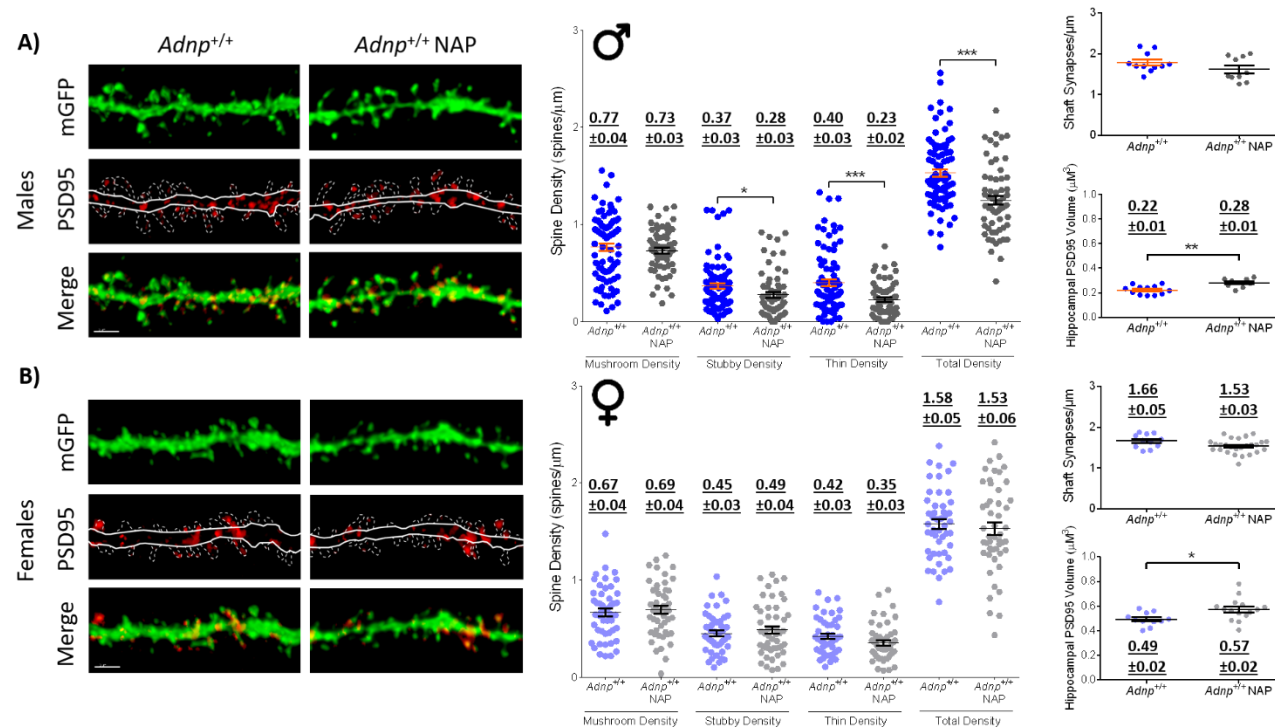

**Fig. S3. In the hippocampus, NAP-treated male  $Adnp^{+/+}$  mice display significant decreased dendritic spine density, without affecting mushroom spine density or shaft synapse density, coupled to increased PSD95 volume in both sexes.**

Average density of different dendritic spine subtypes (mushroom, stubby, and thin), as well as total spine density is presented (males:  $Adnp^{+/+}$  N=83-84;  $Adnp^{+/+}$  NAP, N=62-63, females:  $Adnp^{+/+}$  N=47-48;  $Adnp^{+/+}$  NAP, N=49 dendrites/experimental group). Shaft synapse density was not affected by NAP treatment in  $Adnp^{+/+}$  mice (males:  $Adnp^{+/+}$  N=11;  $Adnp^{+/+}$  NAP, N=10, females:  $Adnp^{+/+}$  N=11;  $Adnp^{+/+}$  NAP, N=26 dendrites/experimental group). Average hippocampal PSD95 volume was significantly increased by NAP treatment in  $Adnp^{+/+}$  mice of both sexes (males:  $Adnp^{+/+}$  N=12;  $Adnp^{+/+}$  NAP, N=9, females:  $Adnp^{+/+}$  N=11;  $Adnp^{+/+}$  NAP, N=15 dendrites/experimental group). Two-way ANOVA with Tukey post hoc test was performed. Underlined numbers over the graphs represent mean ( $\pm$ SEM) values. **(A)** In males, for total spine density, main genotype (F(1,290)=62.278,  $p < 0.001$ ) and interaction (F(1,290)=31.385,  $p < 0.001$ ) effects were found. For mushroom spine density, main genotype (F(1,290)=71.620,  $p < 0.001$ ), treatment (F(1,290)=8.474,  $p = 0.004$ ), and interaction (F(1,290)=17.294,  $p < 0.001$ ) effects were found. For stubby spine density, main genotype (F(1,289)=13.192,  $p < 0.001$ ) and treatment (F(1,289)=5.514,  $p = 0.020$ ) effects were found. For thin spine density, main treatment (F(1,290)=9.848,  $p = 0.002$ ) and interaction (F(1,290)=7.920,  $p = 0.005$ ) effects were found. For PSD95 volume, main genotype effect was found (F(1,38)=32.485,  $p < 0.001$ ). Significant differences between NAP- and vehicle-treated  $Adnp^{+/+}$  mice (\* $p < 0.05$ , \*\* $p < 0.01$ , \*\*\* $p < 0.001$ ) were observed. **(B)** In females, no significant differences were found for any spine subtype or shaft synapse density. For PSD95 volume, main genotype (F(1,58)=9.322,  $p = 0.003$ ) and treatment (F(1,58)=9.151,  $p = 0.004$ ) effects were found. Significant differences between NAP- and vehicle-treated  $Adnp^{+/+}$  mice (\* $p < 0.05$ ) were observed. **(A-B)**  $Adnp^{+/+}$  is reshown in Figure 1A-B. Scale bar: 2  $\mu\text{m}$ .



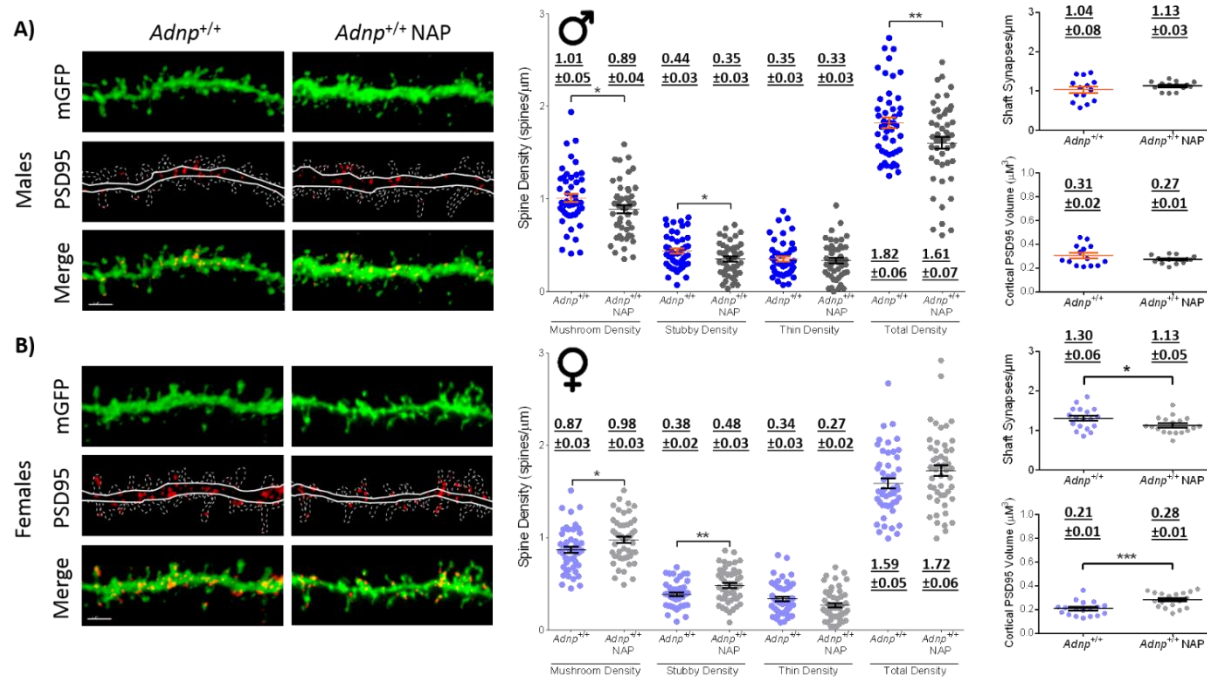

**Fig. S4. In the cortex, NAP-treated *Adnp*<sup>+/+</sup> mice display altered spine density, with females displaying decreased shaft synapse density, coupled to increased PSD95 volume.**

Average density of different dendritic spine subtypes (mushroom, stubby, and thin), as well as total spine density is presented (males: *Adnp*<sup>+/+</sup> N=46-47; *Adnp*<sup>+/+</sup> NAP, N=45-47, females: *Adnp*<sup>+/+</sup> N=47; *Adnp*<sup>+/+</sup> NAP, N=49 dendrites/experimental group). Shaft synapse density was not affected by NAP treatment in male *Adnp*<sup>+/+</sup> mice and was decreased in female NAP-treated *Adnp*<sup>+/+</sup> mice (males: *Adnp*<sup>+/+</sup> N=14; *Adnp*<sup>+/+</sup> NAP, N=14, females: *Adnp*<sup>+/+</sup> N=18; *Adnp*<sup>+/+</sup> NAP, N=18 dendrites/experimental group). Average cortical PSD95 volume was not affected by NAP treatment in male *Adnp*<sup>+/+</sup> mice and was increased in female NAP-treated *Adnp*<sup>+/+</sup> mice (Males: *Adnp*<sup>+/+</sup> N=14; *Adnp*<sup>+/+</sup> NAP, N=14, Females: *Adnp*<sup>+/+</sup> N=18; *Adnp*<sup>+/+</sup> NAP, N=18 dendrites/experimental group). Two-way ANOVA with Tukey post hoc test was performed. Underlined numbers over the graphs represent mean ( $\pm$ SEM) values. **(A)** In males, for total spine density, main genotype ( $F(1,178)=26.892$ ,  $p<0.001$ ), treatment ( $F(1,178)=29.250$ ,  $p<0.001$ ) and interaction ( $F(1,178)=82.876$ ,  $p<0.001$ ) effects were found. For mushroom spine density, main genotype ( $F(1,178)=17.707$ ,  $p<0.001$ ), treatment ( $F(1,178)=26.348$ ,  $p<0.001$ ), and interaction ( $F(1,178)=63.039$ ,  $p<0.001$ ) effects were found. For stubby spine density, main interaction effect was found ( $F(1,175)=11.172$ ,  $p=0.001$ ). Significant differences between NAP- and vehicle-treated *Adnp*<sup>+/+</sup> mice (\* $p<0.05$ , \*\* $p<0.01$ ) were observed. **(B)** In females, for mushroom spine density, main genotype ( $F(1,188)=85.518$ ,  $p<0.001$ ), treatment ( $F(1,188)=35.742$ ,  $p<0.001$ ), and interaction ( $F(1,188)=8.427$ ,  $p=0.004$ ) effects were found. For stubby spine density, main genotype ( $F(1,188)=17.509$ ,  $p<0.001$ ) and treatment ( $F(1,188)=6.653$ ,  $p=0.011$ ) effects were found. For shaft synapse density, main treatment effect was found ( $F(1,67)=12.743$ ,  $p<0.001$ ). For PSD95 volume, main genotype ( $F(1,68)=37.581$ ,  $p<0.001$ ) and treatment ( $F(1,68)=21.971$ ,  $p<0.001$ ) effects were found. Significant differences between NAP- and vehicle-treated *Adnp*<sup>+/+</sup> mice (\* $p<0.05$ , \*\* $p<0.01$ , \*\*\* $p<0.001$ ) were observed. **(A-B)** *Adnp*<sup>+/+</sup> is reshown in Figure 2A-B. Scale bar: 2  $\mu\text{m}$ .

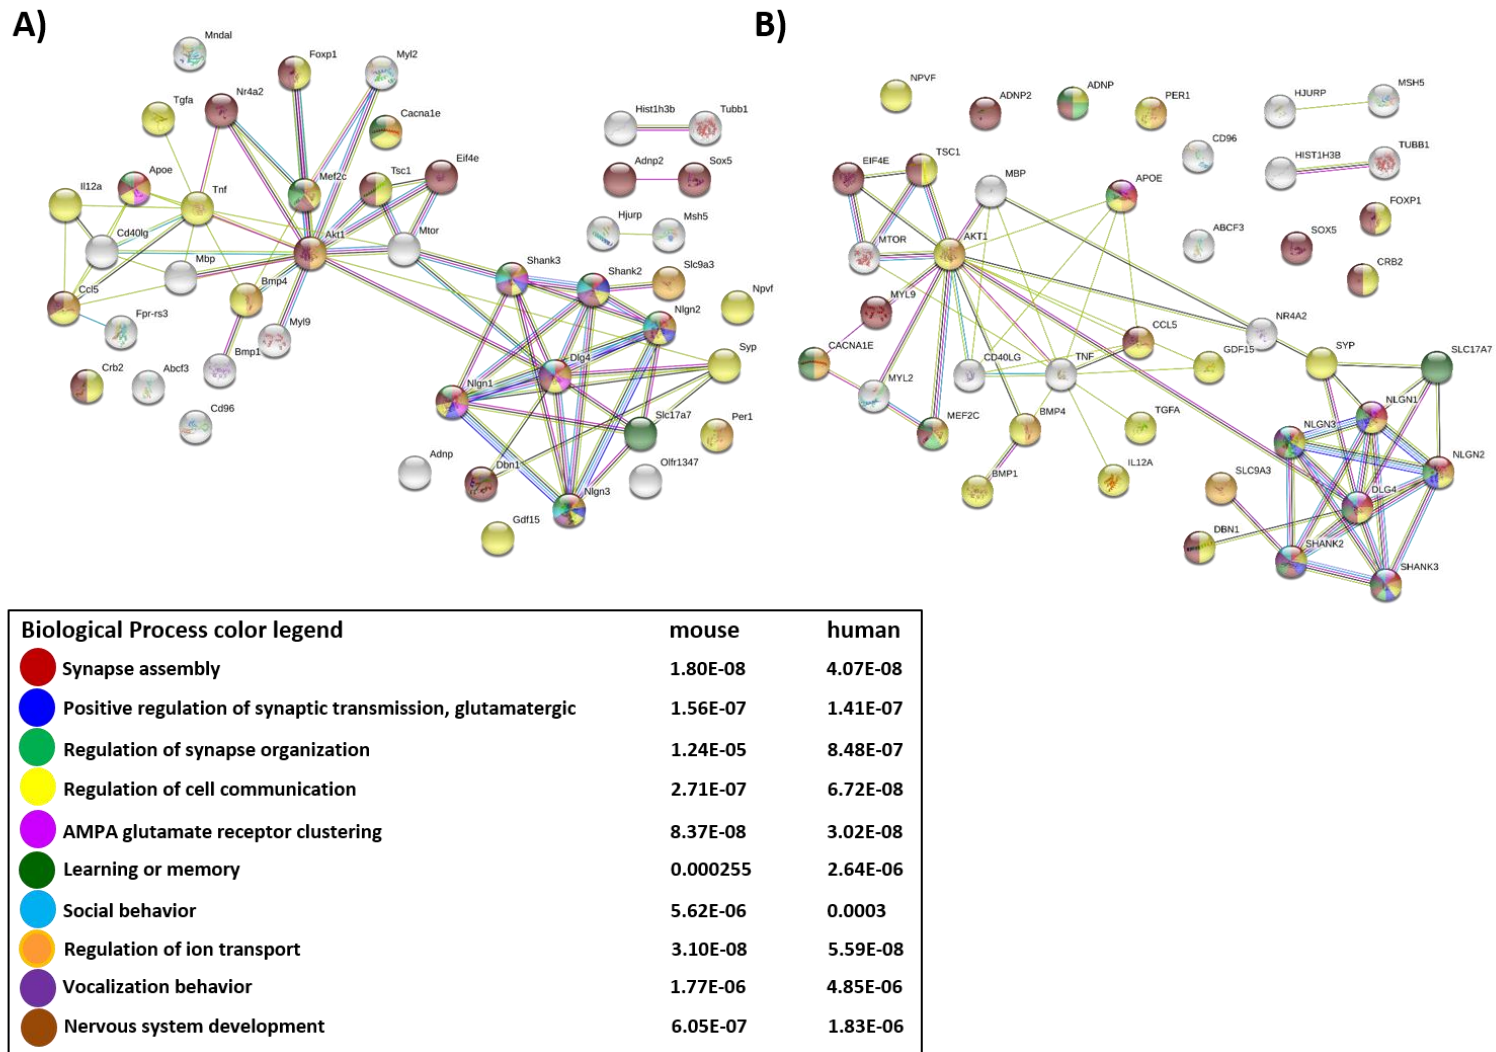

**Fig. S5. Function enrichment and network analysis in 19-27-day-old mice.**

STRING protein-protein interaction network (2) (<https://string-db.org>) was performed for the genes listed in Table S5, compared to either mouse (A) or human database (B). Enriched biological processes were marked on network according to color legend.

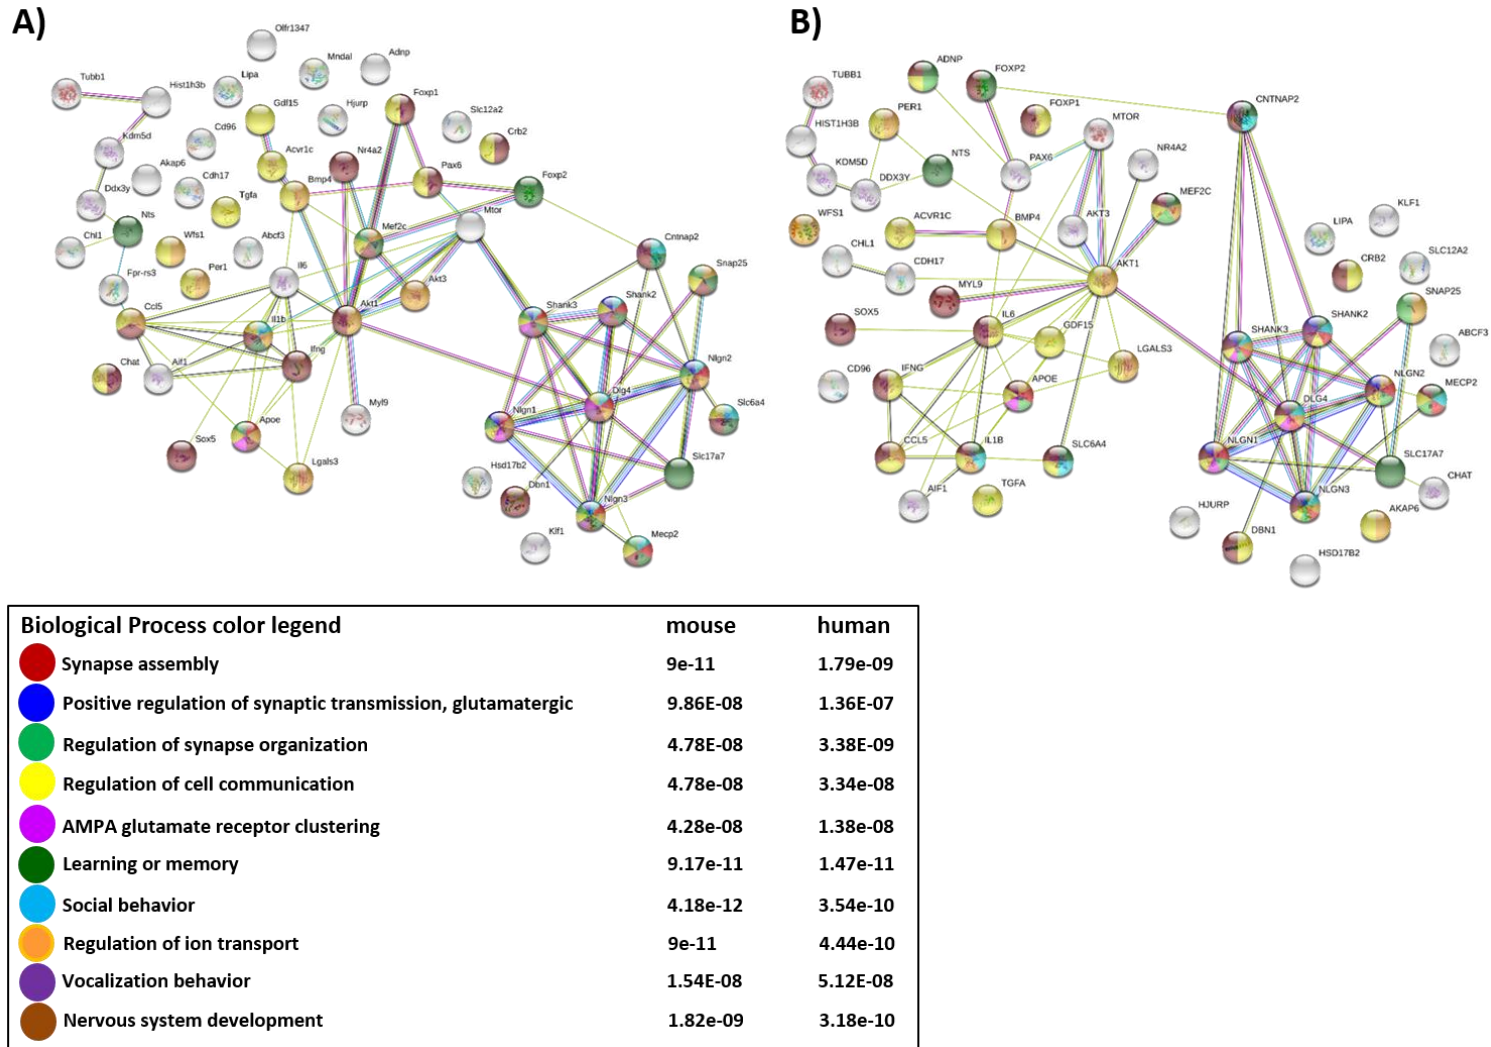

**Fig. S6. Function enrichment and network analysis in 3-month-old mice.**

STRING protein-protein interaction network (2) (<https://string-db.org>) was performed for the genes listed in Table S8, compared to either mouse (A) or human database (B). Enriched biological processes were marked on network according to color legend.

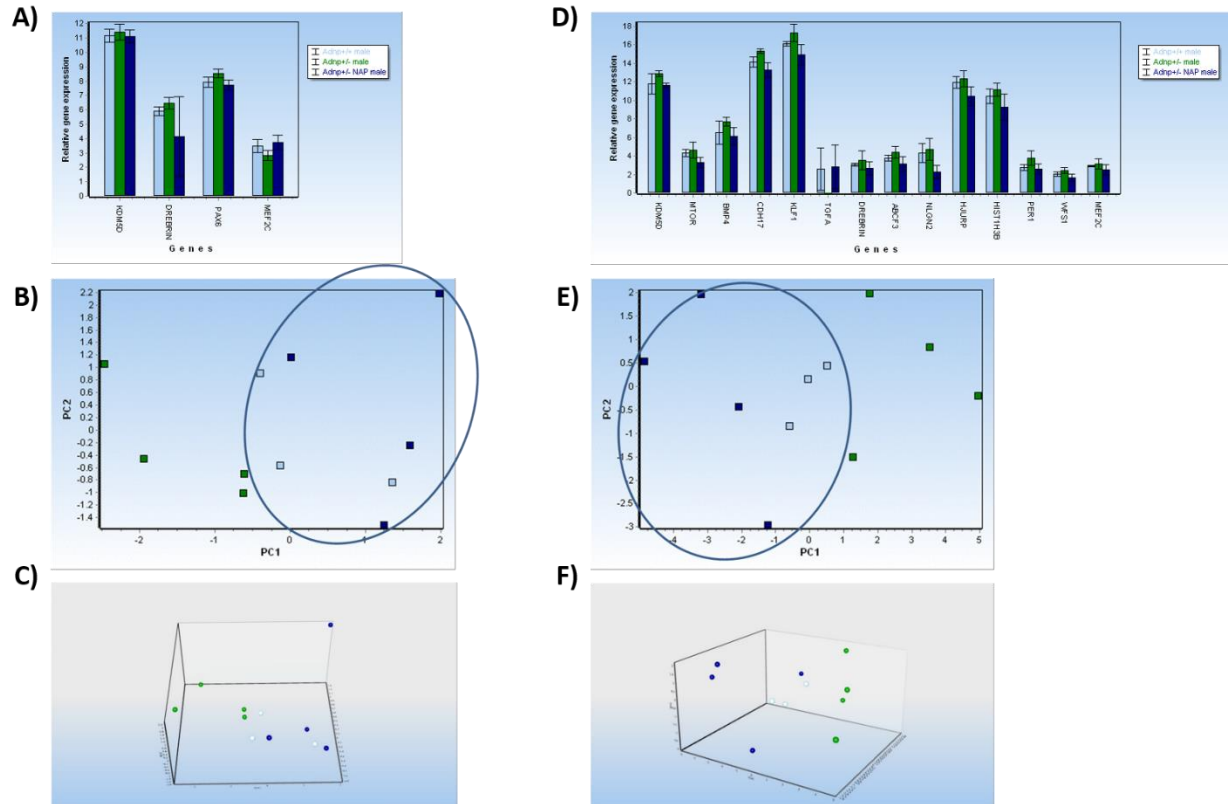

**Fig. S7. Principal Component Analysis (PCA) of selected genes in 3-month-old male hippocampus and spleen.**

High-throughput quantitative real-time PCR was performed on mRNA extracted from hippocampus, cortex, and spleen of 3-month-old male mice (*Adnp*<sup>+/+</sup> N=3; *Adnp*<sup>+/-</sup> N=4; *Adnp*<sup>+/-</sup> NAP, N=4). Results are shown as relative expression units. **(A)** Relative expression of genes displaying good separation of groups in male hippocampus. **(B-C)** PCA based on selected male hippocampal genes from figure S8A. Dark blue group of samples (*Adnp*<sup>+/-</sup> NAP) is clustered with light blue group (*Adnp*<sup>+/+</sup>), but not with green group of samples (*Adnp*<sup>+/-</sup>). **(D)** Relative expression of genes displaying good separation of groups in male spleen. **(E-F)** PCA based on selected male splenic genes from figure S8D. Dark blue group of samples (*Adnp*<sup>+/-</sup> NAP) is clustered with light blue group (*Adnp*<sup>+/+</sup>), but not to green group of samples (*Adnp*<sup>+/-</sup>). Data are expressed as mean ± Standard Deviation (SD).

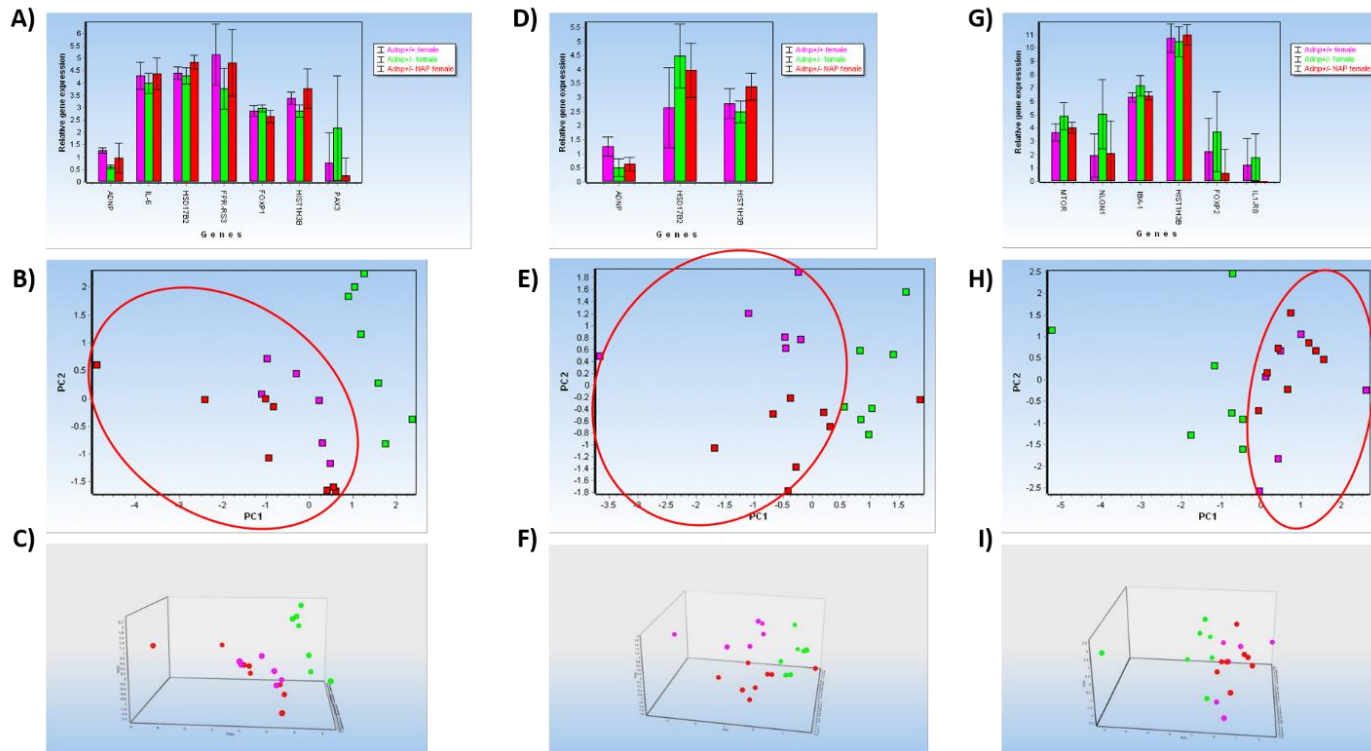

**Fig. S8. Principal Component Analysis (PCA) of selected genes in 3-month-old female cortex, hippocampus and spleen.**

High-throughput quantitative real-time PCR was performed on mRNA extracted from hippocampus, cortex, and spleen of 3-month-old female mice (*Adnp*<sup>+/+</sup> N=6; *Adnp*<sup>+/-</sup> N=7; *Adnp*<sup>+/-</sup> NAP, N=8). Results are shown as relative expression units. **(A)** Relative expression of genes displaying good separation of groups in female cortex. **(B-C)** PCA based on selected female cortical genes from figure S9A. Red group of samples (*Adnp*<sup>+/-</sup> NAP) is clustered with pink group (*Adnp*<sup>+/+</sup>), but not to green group of samples (*Adnp*<sup>+/-</sup>). **(D)** Relative expression of genes displaying good separation of groups in female hippocampus. **(E-F)** PCA based on selected female hippocampal genes from figure S9D. Red group of samples (*Adnp*<sup>+/-</sup> NAP) is clustered with pink group (*Adnp*<sup>+/+</sup>), but not to green group of samples (*Adnp*<sup>+/-</sup>). **(G)** Relative expression of genes displaying good separation of groups in female spleen. **(H-I)** PCA based on selected female splenic genes from figure S9G. Red group of samples (*Adnp*<sup>+/-</sup> NAP) is clustered with pink group (*Adnp*<sup>+/+</sup>), but not to green group of samples (*Adnp*<sup>+/-</sup>). Data are expressed as mean ± Standard Deviation (SD).

## Fold change (FC) of gene expression in LCLs

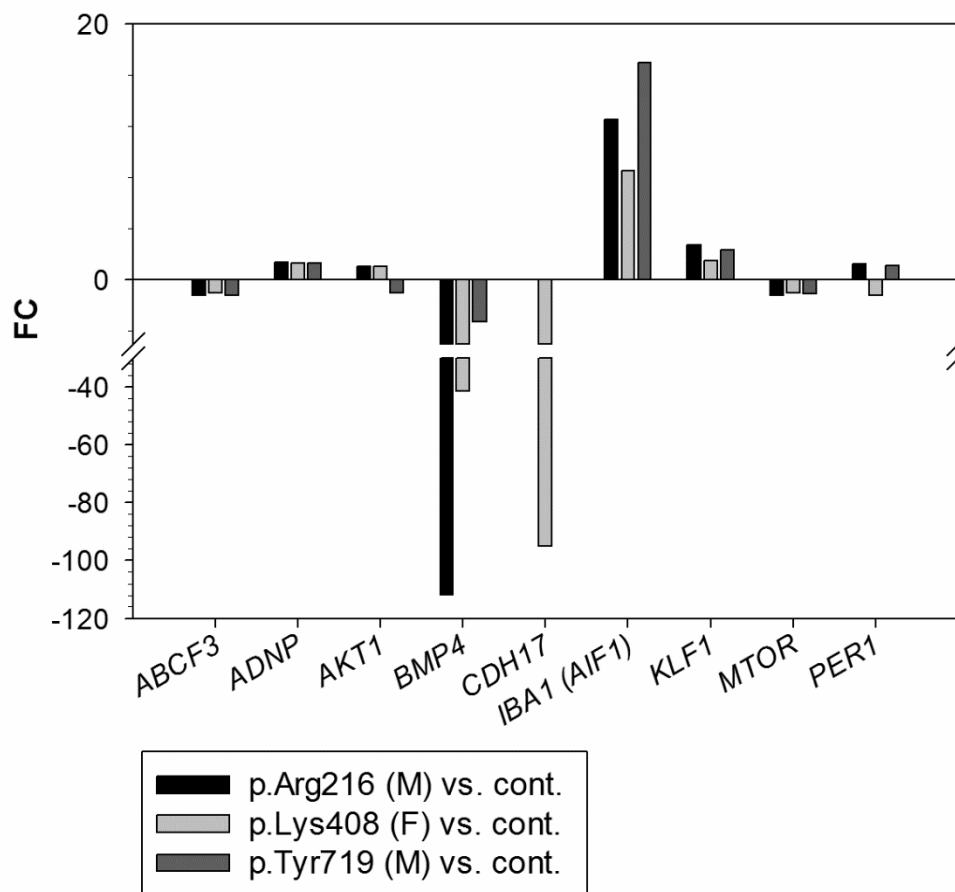

**Fig. S9. Gene expression patterns in *ADNP* mutated lymphoblastoid cells mimic the *Adnp* haploinsufficient mouse model.** RNA-seq and bioinformatics were performed as previously described on the lymphoblastoid cells (LCL lines; male (M), female (F)). The data have been uploaded to GEO, GSE81268 (described in our previous publications: references 6 and 18 in main text).



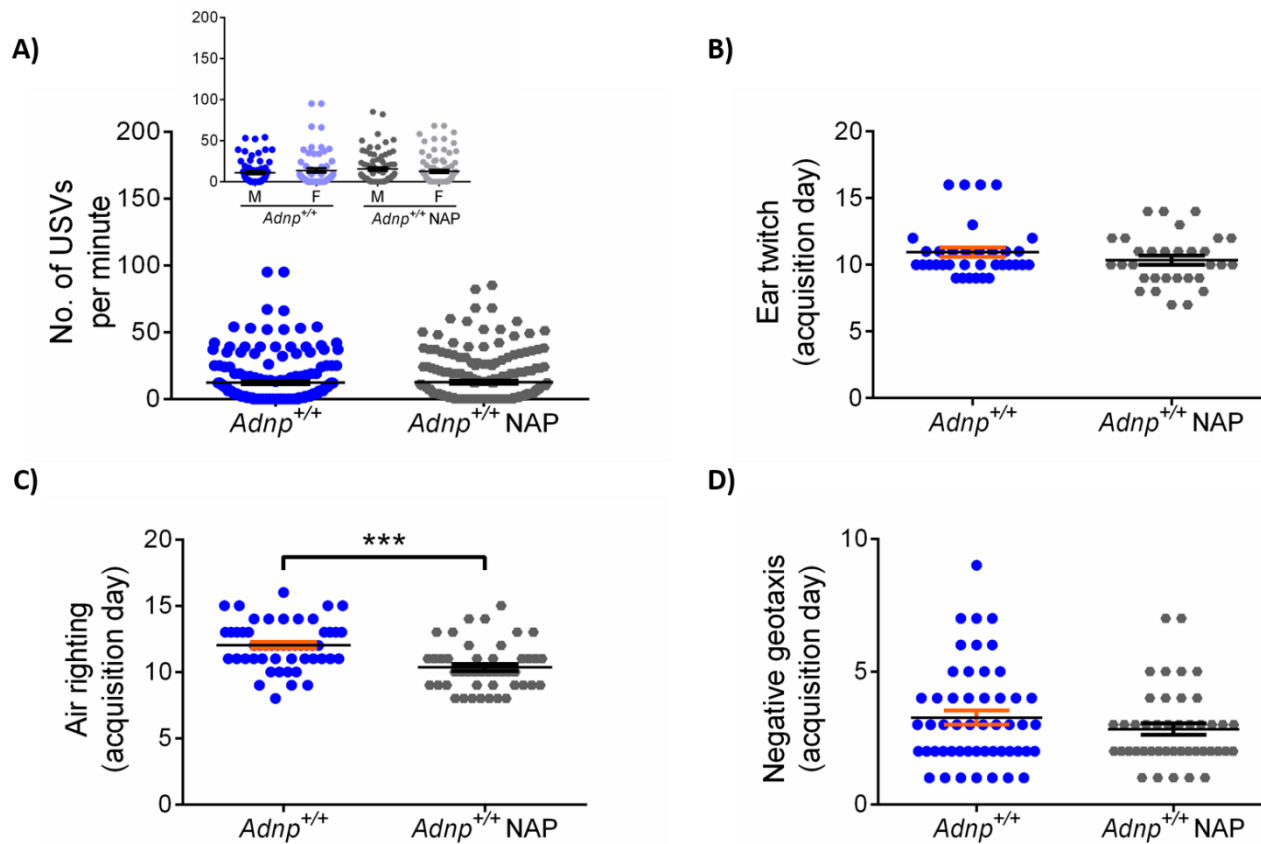

**Fig. S10. NAP treatment improves air righting reflex in *Adnp*<sup>+/+</sup> mice, without affecting ultrasonic vocalizations and other developmental milestones of *Adnp*<sup>+/+</sup> mice.**

(A) USVs from 8-day old *Adnp* pups were recorded for 6 minutes, following dam separation<sup>44</sup>, and daily subcutaneous injections of NAP (25µg/ml) (20µl and 40µl on postnatal days 1-4 and 5-7, accordingly)<sup>4, 43</sup>. Results are presented as mean (±SEM) number of ultrasonic vocalizations recorded per minute of the trial (males: *Adnp*<sup>+/+</sup> N=11; *Adnp*<sup>+/+</sup> NAP, N=13, females: *Adnp*<sup>+/+</sup> N=11; *Adnp*<sup>+/+</sup> NAP, N=15, 6 USV calls per mouse). No significant differences were observed between NAP- and vehicle-treated *Adnp*<sup>+/+</sup> mice. Additionally, no significant sex differences were found (males (M), females (F); inset graph). (B-D) For developmental milestone measurement, two-way ANOVA with Tukey post hoc test was performed, with data expressed as the mean (±SEM) of the first neonatal day of success in the test (*Adnp*<sup>+/+</sup> N=35-51; *Adnp*<sup>+/+</sup> NAP, N=31-45). **For air righting reflex:** a significant main treatment effect was found (F(1,164)=24.838, p<0.001), with NAP-treated *Adnp*<sup>+/+</sup> pups acquiring air righting reflex significantly earlier than *Adnp*<sup>+/+</sup> pups (\*\*\*)p<0.001). **For ear twitch and negative geotaxis reflexes:** no significant differences were observed between NAP- and vehicle-treated *Adnp*<sup>+/+</sup> mice. (A-D) *Adnp*<sup>+/+</sup> is reshown in Figure 5A-D.

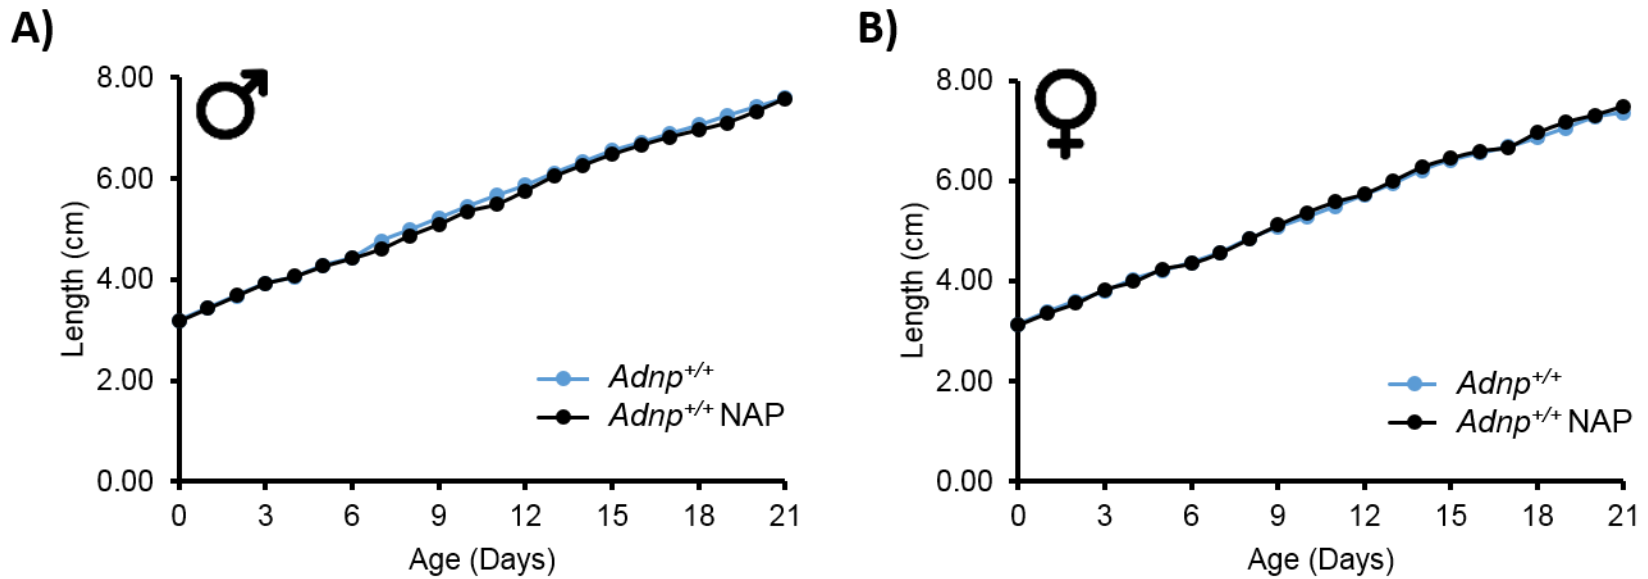

**Fig. S11. NAP treatment did not affect length acquisition in male and female  $Adnp^{+/+}$  pups.** (A-B) In both males and females, Two-way ANOVA repeated measures with Bonferroni's multiple comparisons test did not reveal significant differences in length acquisition between NAP- and vehicle-treated  $Adnp^{+/+}$  littermates (males:  $Adnp^{+/+}$  N=18;  $Adnp^{+/+}$  NAP, N=14, females:  $Adnp^{+/+}$  N=20;  $Adnp^{+/+}$  NAP, N=17). (A-B)  $Adnp^{+/+}$  is reshown in Figure 6A-B.



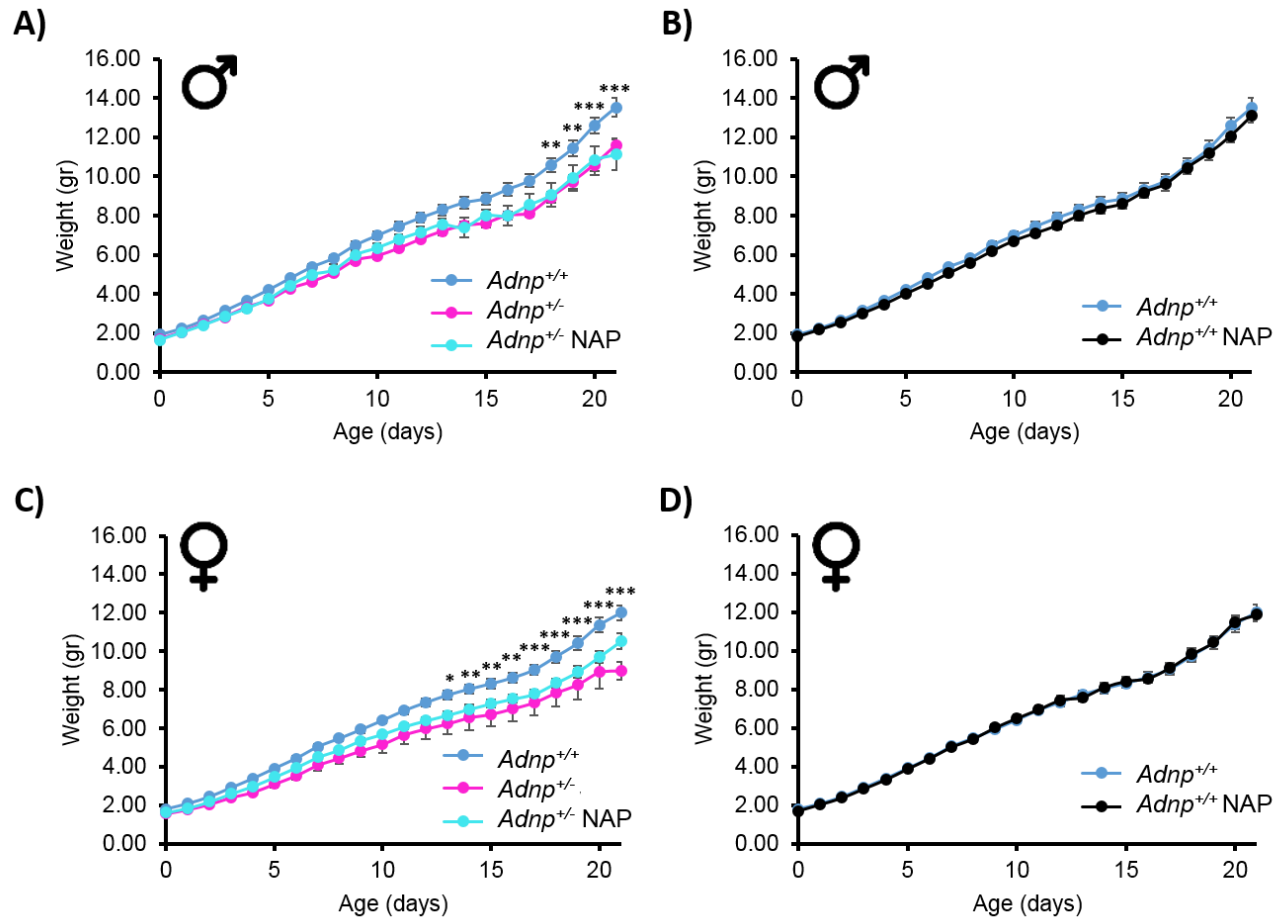

**Fig. S12. *Adnp*<sup>+/-</sup> pups exhibit significant delayed weight gain during developmental period.**

Two-way ANOVA repeated measures with Bonferroni's multiple comparisons test revealed significant differences in weight between *Adnp*<sup>+/+</sup> and *Adnp*<sup>+/-</sup> littermates (males: *Adnp*<sup>+/+</sup> N=18; *Adnp*<sup>+/+</sup> NAP, N=14; *Adnp*<sup>+/-</sup> N=12; *Adnp*<sup>+/-</sup> NAP, N=12, females: *Adnp*<sup>+/+</sup> N=20; *Adnp*<sup>+/+</sup> NAP, N=17; *Adnp*<sup>+/-</sup> N=9; *Adnp*<sup>+/-</sup> NAP, N=23). (A) For males, main effects for group ( $F(1,28)=11.925$ ,  $p=0.002$ ), day ( $F(21,565)=810.520$ ,  $p<0.001$ ) and interaction  $F(21,565)=6.898$ ,  $p<0.001$ ) were found, with significant differences between *Adnp*<sup>+/+</sup> and *Adnp*<sup>+/-</sup> mice, as indicated in graph (\*\* $p<0.01$ , \*\*\* $p<0.001$ ). (B) No significant differences were observed in weight gain between NAP- and vehicle-treated male *Adnp*<sup>+/+</sup> littermates. (C) For females, main effects for group ( $F(1,27)=23.069$ ,  $p<0.001$ ), day ( $F(21,545)=512.322$ ,  $p<0.001$ ) and interaction  $F(21,545)=13.476$ ,  $p<0.001$ ) were found, with significant differences between *Adnp*<sup>+/+</sup> and *Adnp*<sup>+/-</sup> mice, as indicated in graph (\* $p<0.05$ , \*\* $p<0.01$ , \*\*\* $p<0.001$ ). NAP treatment did not affect weight gain in male and female pups of both genotypes. (D) No significant differences were observed in weight gain between NAP- and vehicle-treated female *Adnp*<sup>+/+</sup> littermates.

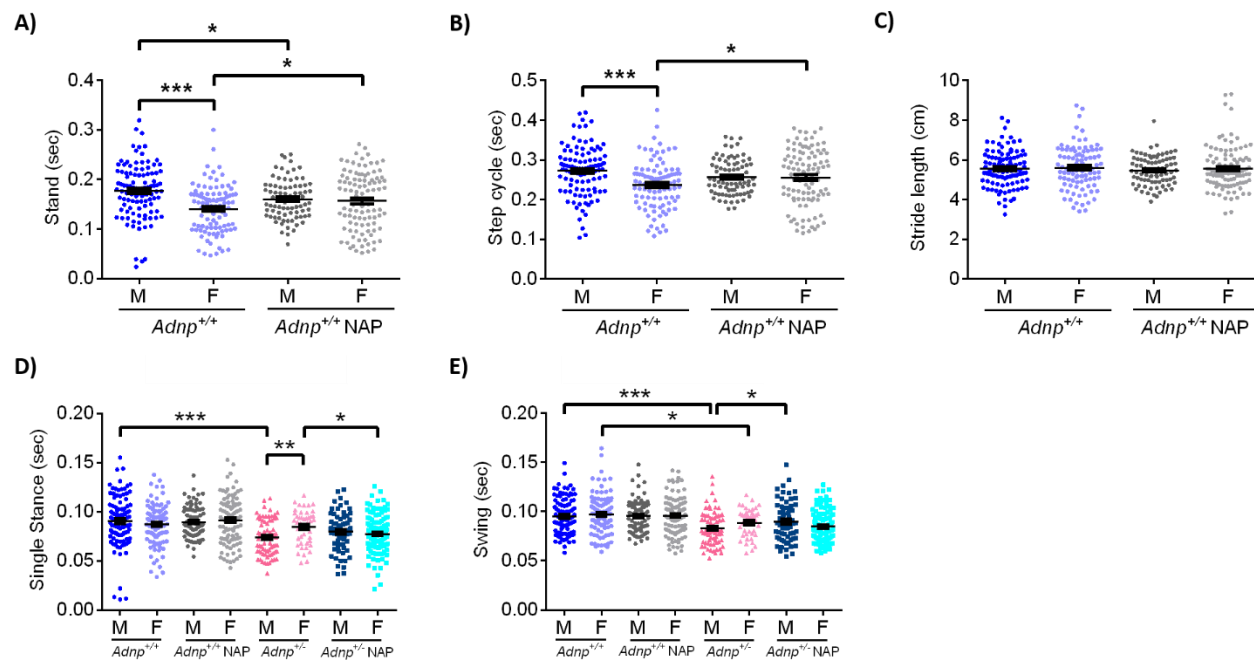

**Fig. S13. NAP treatment slightly affects stand and step cycle gait parameters of *Adnp*<sup>+/+</sup> mice. *Adnp*<sup>+/-</sup> mice exhibit impaired single stance and swing gait parameters at the age of 18-40 days, with significant improvement observed in swing.**

Two-way ANOVA with Tukey post hoc test was performed. Unpaired student's t-test or Mann-Whitney U test analyses were also used to determine sex differences (males: *Adnp*<sup>+/+</sup> N=104; *Adnp*<sup>+/+</sup> NAP, N=80; *Adnp*<sup>+/-</sup> N=72; *Adnp*<sup>+/-</sup> NAP, N=64, females: *Adnp*<sup>+/+</sup> N=96; *Adnp*<sup>+/+</sup> NAP, N=100; *Adnp*<sup>+/-</sup> N=44; *Adnp*<sup>+/-</sup> NAP, N=116 paw replicates/experimental group). **(A-C)** Sex differences in gait (\*\*\*)*p*<0.001, t-tests), as well as slight changes caused by NAP treatment were observed in *Adnp*<sup>+/+</sup> mice. **For stand (sec):** main genotype (F(1,316)=23.683, *p*<0.001) and interaction (F(1,316)=18.030, *p*<0.001) effects were found in males. In females, main interaction effect was found (F(1,352)=4.894, *p*=0.028). **For step cycle (sec):** a main interaction effect was found in females (F(1,352)=4.974, *p*=0.026). For stand and step cycle parameters, significant differences between NAP- and vehicle-treated *Adnp*<sup>+/+</sup> mice (\**p*<0.05) were found, as well as sex differences (\*\*\*)*p*<0.001, t-test). For stride length, no significant differences were observed between NAP- and vehicle-treated *Adnp*<sup>+/+</sup> mice. **(D-E)** Single stance time-period was significantly reduced in the *Adnp*<sup>+/-</sup> male, but not female mice and was not ameliorated by NAP treatment. Although the NAP-treated *Adnp*<sup>+/+</sup> mice did not differ from controls, in females, NAP treatment slightly reduced the single stance time. **For single stance:** main genotype effect was found in males (F(1,315)=31.494, *p*<0.001), with significant differences between *Adnp*<sup>+/+</sup> and *Adnp*<sup>+/-</sup> mice (\*\*\*)*p*<0.001). In females, main genotype (F(1,352)=12.520, *p*<0.001) and interaction (F(1,352)=5.850, *p*=0.016) effects were found. Significant differences between male *Adnp*<sup>+/+</sup> and *Adnp*<sup>+/-</sup> mice (\*\*\*)*p*<0.001), as well as NAP- vs. vehicle-treated female *Adnp*<sup>+/-</sup> mice were observed (\**p*<0.05), together with sex differences in *Adnp*<sup>+/-</sup> mice (\*\*)*p*<0.01, Mann-Whitney U test). **For swing:** main genotype effect was found in males (F(1,315)=18.686, *p*<0.001) and females (F(1,350)=23.403, *p*<0.001). Significant differences between *Adnp*<sup>+/+</sup> and *Adnp*<sup>+/-</sup> mice (\**p*<0.05, \*\*\*)*p*<0.001), as well as NAP- vs. vehicle male *Adnp*<sup>+/-</sup> mice (\**p*<0.05) were observed. **(A-C)** *Adnp*<sup>+/+</sup> is reshown in Figure 6C-E.

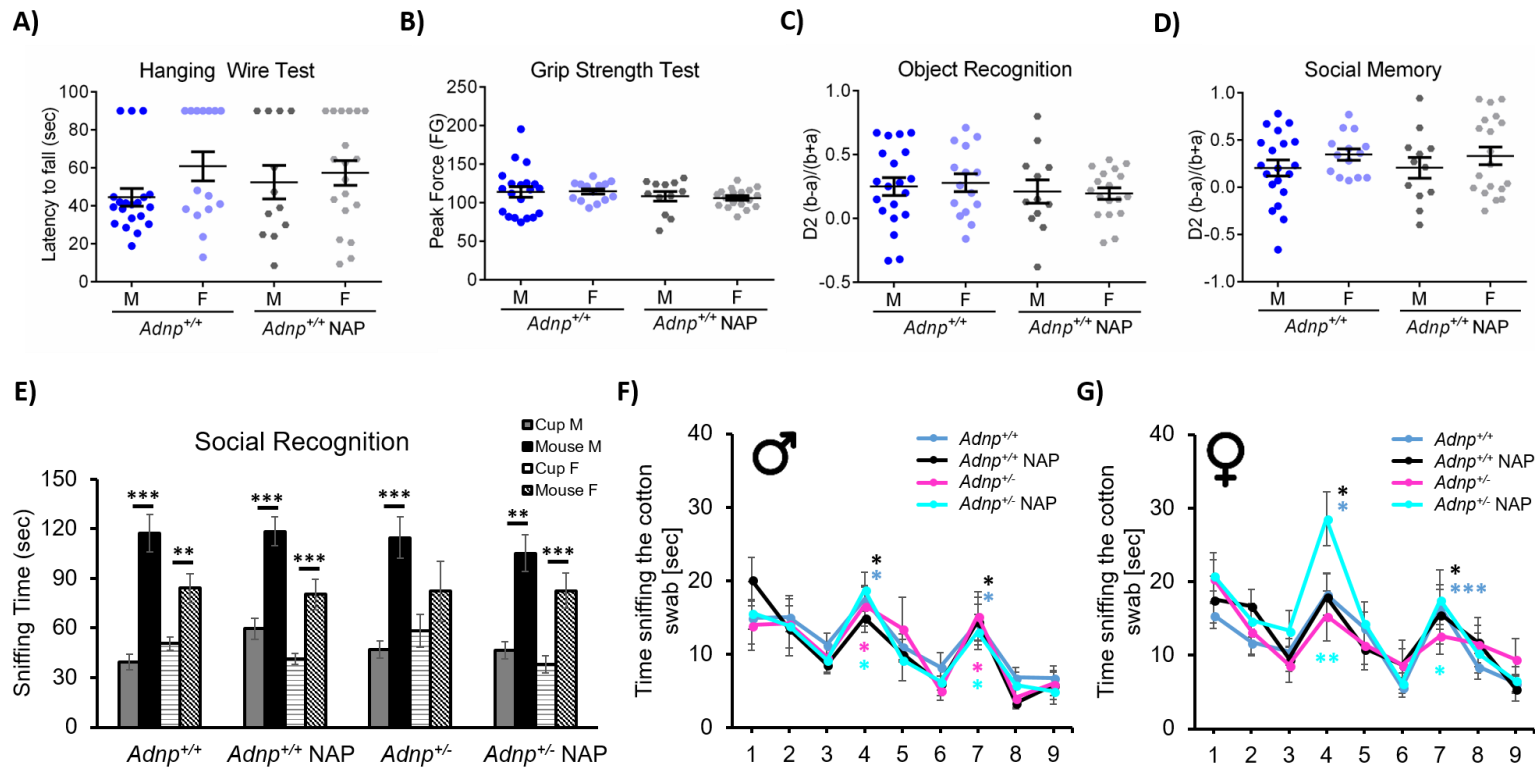

**Fig. S14. NAP treatment does not affect motor, memory, social aspects of *Adnp*<sup>+/+</sup> mice, but restores odor discrimination ability in female *Adnp*<sup>+/-</sup> mice.**

(A-D) In hanging wire, grip strength, novel object recognition and social memory behavioral tests, no significant differences were observed between NAP- and vehicle-treated *Adnp*<sup>+/+</sup> mice. Additionally, no significant sex differences were found (males (M): *Adnp*<sup>+/+</sup> N=20; *Adnp*<sup>+/+</sup> NAP, N=12, females (F): *Adnp*<sup>+/+</sup> N=14-15; *Adnp*<sup>+/+</sup> NAP, N=18-19). (E) Two-way repeated measures ANOVA with group as a fixed factor and sniffed item (e.g. mouse vs. cup) as repeated factor and Tukey post hoc test was performed (males: *Adnp*<sup>+/+</sup> N=20; *Adnp*<sup>+/+</sup> NAP, N=12; *Adnp*<sup>+/-</sup> N=12; *Adnp*<sup>+/-</sup> NAP, N=9, females: *Adnp*<sup>+/+</sup> N=15; *Adnp*<sup>+/+</sup> NAP, N=19; *Adnp*<sup>+/-</sup> N=7; *Adnp*<sup>+/-</sup> NAP, N=20). For males and females, a main effect for the sniffed item (F(1,47)=83.483, p<0.001; F(1,56)=30.447, p<0.001, accordingly), indicating a strong preference for the novel mouse over the pencil cup was found, with significant differences between sniffing time of the cup and mouse in vehicle- and NAP-treated *Adnp*<sup>+/+</sup> mice (\*\*p<0.01, \*\*\*p<0.001 vs. cup), as well as in vehicle-treated male *Adnp*<sup>+/-</sup> mice, and NAP-treated *Adnp*<sup>+/-</sup> mice (\*\*p<0.01, \*\*\*p<0.001 vs. cup). (F-G) Male mice display intact odor discrimination ability. \*p<0.05, vs. previous sniffing (novel vs. familiar odor), paired t-test. Female *Adnp*<sup>+/-</sup> mice exhibit impaired olfactory function, restored by NAP treatment. \*p<0.05, \*\*p<0.01, \*\*\*p<0.001 vs. previous sniffing (novel vs. familiar odor), paired t-test (males: *Adnp*<sup>+/+</sup> N=11; *Adnp*<sup>+/+</sup> NAP, N=7; *Adnp*<sup>+/-</sup> N=6; *Adnp*<sup>+/-</sup> NAP, N=6, females: *Adnp*<sup>+/+</sup> N=11; *Adnp*<sup>+/+</sup> NAP, N=10; *Adnp*<sup>+/-</sup> N=5; *Adnp*<sup>+/-</sup> NAP, N=15). (A-D) *Adnp*<sup>+/+</sup> is reshown in Figure 7A-C, F; (E, G) *Adnp*<sup>+/+</sup> is reshown in Figure 7D, E.

## **Supplemental Materials and Methods:**

**Table S16: Experimental group allocation (N = Number of animals per experimental group).**

| Experimental method / Behavioral test           | Age            | <i>Adnp</i> <sup>+/+</sup> |         | <i>Adnp</i> <sup>+/+</sup> NAP |         | <i>Adnp</i> <sup>+/-</sup> |         | <i>Adnp</i> <sup>+/-</sup> NAP |         |
|-------------------------------------------------|----------------|----------------------------|---------|--------------------------------|---------|----------------------------|---------|--------------------------------|---------|
|                                                 |                | Males                      | Females | Males                          | Females | Males                      | Females | Males                          | Females |
| Immunohistochemistry                            | 3 months       | 4                          | 4       | 4                              | 4       | 3                          | 4       | 3                              | 4       |
| High-throughput qRT-PCR                         | 19-27 days     | 5                          | 6       | NA                             | NA      | 5                          | 4       | 5                              | 5       |
|                                                 | 3 months       | 3                          | 6       | NA                             | NA      | 4                          | 7       | 4                              | 8       |
| Ultrasonic Vocalization (6 USV calls per mouse) | 8 days         | 11                         | 11      | 13                             | 15      | 9                          | 8       | 6                              | 5       |
| Ear twitch                                      | 7-15 days      | 20                         | 15      | 12                             | 19      | 12                         | 7       | 8                              | 20      |
| Air righting                                    | 8-21 days      | 27                         | 24      | 19                             | 26      | 18                         | 11      | 15                             | 28      |
| Negative geotaxis                               | 1-14 days      | 27                         | 24      | 19                             | 26      | 18                         | 11      | 15                             | 28      |
| Eye opening                                     | 1-21 days      | 27                         | 24      | 19                             | 26      | 18                         | 11      | 15                             | 28      |
| Gait analysis (CatWalk)                         | 18-40 days     | 26                         | 24      | 20                             | 25      | 18                         | 11      | 16                             | 29      |
| Hanging wire                                    | 1-4 months     | 20                         | 15      | 12                             | 19      | 12                         | 7       | 9                              | 20      |
| Forelimb grip strength                          | 1-4 months     | 20                         | 14      | 12                             | 19      | 12                         | 7       | 9                              | 20      |
| Object recognition                              | 1.5-4 months   | 20                         | 15      | 12                             | 18      | 12                         | 7       | 9                              | 20      |
| Social approach task                            | 1.5-4 months   | 20                         | 15      | 12                             | 19      | 12                         | 7       | 9                              | 20      |
| Odor discrimination                             | 2.5-5.5 months | 11                         | 11      | 7                              | 10      | 6                          | 5       | 6                              | 15      |

Immunohistochemistry: Mice were perfused transcardially under deep anesthesia with 4% paraformaldehyde (PFA) in 0.1M PBS, pH 7.4 and their brains were removed, post-fixed in the same fixative at 4°C overnight, and then transferred to 0.1M PBS for long-term preservation. Following brain sectioning, hippocampal and cortical brain slices were incubated overnight at 4°C in blocking solution: 1.5% normal horse serum (NHS), 0.4% Triton X-100 in 0.1M PB pH 7.4. Slices were then incubated overnight at 4 °C in blocking solution (1.5% NHS and 0.4% Triton X-100 in 0.1M PB) containing a monoclonal rabbit anti-GFP (1:250; Cat. No. G10362, Thermo Fisher Scientific, Burlington, ON, Canada), and in a randomly-chosen smaller subset, a monoclonal mouse anti-PSD95 (1:250; Cat. No. MA1-045, Thermo Fisher Scientific, Burlington, ON, Canada). Slices were washed 3 times in a solution of 0.1M PB containing 1.5%

NHS at 4 °C, with the third wash left for overnight duration. Subsequently, slices were incubated for 2 hours at RT with secondary antibodies: goat anti-rabbit Alexa Fluor 488 (1:250; Cat. No. A-11008, Life Technologies, Eugene, OR, United States), and goat anti-mouse Alexa Fluor 594 (1:250; Cat. No. A-11005, Invitrogen, Eugene, OR, United States). The slices were washed 3 times, with the third wash left for overnight duration. Then, the slices were flat mounted on glass slides and prepared for visualization and imaging.

Confocal Imaging: Mounted coronal sections were imaged using a Leica SP2 confocal microscope. Images were acquired using a 63X HCXPL APO oil-immersion objectives (NA 1.4). GFP was imaged using a 488 nm Ar laser line, and Alexa Fluor 594 was imaged using a 543 nm HeNe laser line. Channels were acquired sequentially to prevent spectral overlap of fluorophores. Optical sections of 300 nm were taken and frame averaged 3X to improve the signal-to-noise ratio. Once the images were captured, the area of interest was cropped and further processed for 3D reconstruction and analysis.

Three-dimensional reconstructions and spine quantification: Detailed numbers of dendrites/slices/slides/animals are described in Table S1. Three-dimensional images were first deconvolved with HUYGENS ESSENTIALS software (Scientific Volume Imaging, Hilversum, The Netherlands) by use of a full maximum likelihood extrapolation algorithm. Stacks were then imported and rendered with SURPASS function in Imaris (Bitplane AG). Imaris x64 8.1.2 (Bitplane AG) was used for semi-automated dendritic spine identification and quantification of all dendritic spines. The spine detection/classification program automatically detected the length of the spine head and neck. From the ratio of the diameter and the length of the head and the neck of the spines, it was possible to distinguish

the stubby, mushroom, long, thin spines, dendrite branches, and filopodia based on previously established criteria (3, 4). For analyses of shaft synapses and PSD95 volume, an isosurface was generated based on the fluorescence intensity of the 488-nm channel of the 3D confocal stack exclusively around the dendritic shaft, i.e. excluding dendritic spines. Based off this isosurface, a mask was performed on the 594-nm label to isolate puncta present only in the dendritic shaft. The “Spot” function of Imaris was then used to calculate the number of puncta present within each section of dendrite, as well as the mean volume of all puncta per section of dendrite in each image.

High-throughput qRT-PCR (HT qRT-PCR): Each cDNA sample was preamplified prior to the HT qRT-PCR. Preamplification reaction contained the following ingredients, 2  $\mu$ l of 5ng/ $\mu$ l cDNA, 2.5  $\mu$ l of assay pool (mix of 93 pairs of primes in final concentration 100 nM), 5  $\mu$ l of iQ supermix (Bio-Rad) and 0.5  $\mu$ l nuclease free water. Preamplification was performed at C1000 (Bio-Rad) as follows: 95°C for 3 min, 18 cycles of 95°C for 15 s and 60°C for 4 min. After preamplification, each reaction was diluted 10x, and the control of preamplification quality was assessed for all assays (selected assays are shown in Table S4).

Final qPCR was performed with the high-throughput platform BioMark™ HD System (Fluidigm) using 96.96 Dynamic Array™ IFC for Gene Expression (Fluidigm). 5 $\mu$ l of assay pre-mix was pipetted in assay inlets of the array, contained 2.5  $\mu$ l of 10  $\mu$ M forward and reverse primer mix and 2.5  $\mu$ l of 2 $\times$  assay loading reagent (Fluidigm). 5 $\mu$ l of sample premix for the sample inlets of the array contained: 1.15  $\mu$ l of 10 $\times$  diluted pre-amplified cDNA, 2.5  $\mu$ l of Sso Fast EvaGreen Mastermix (Bio-Rad), 0.25  $\mu$ l of 20 $\times$  SG loading reagent (Fluidigm), 0.1  $\mu$ l of ROX 4x diluted (Sigma-Aldrich) and 1  $\mu$ l of nuclease-free water. Thermal conditions for qPCR were 98 °C for 3 min, 35 cycles of 98 °C for 5 s and 60 °C for 5 s. Melting curve analysis followed.

Fluidigm Real-Time PCR Analysis software (Fluidigm), GenEx Enterprise (MultiD) were used for pre-processing of qPCR data. Baseline correction of the amplification curves was set as linear derivative, and Cq threshold was set as auto detectors. Failed reactions and bad amplification curves were removed (Fluidigm Real-Time PCR Analysis software). After the export of the csv file, data were further preprocessed in GenEx Enterprise (MultiD).

Ultrasonic vocalization (USV): On day 8, each pup was separated from the dam and placed in an empty cage for 6 minutes (5). USVs (40-70 kHz) were recorded using an ultrasonic vocalization detector ANL-973-1 microphone. At the end of each trial, the pup was marked with a tattoo for identification (Ketchum, Canada), and reunited back with its dam, placed in the far corner of the box, allowing the mother to retrieve the pup (5). Data were analyzed using Med USV viewer SOF-937-1 (Med associates, Vermont, USA). The minimal time distance between calls was set to 0.04 seconds and the volume threshold was set to 40dB (5-8). Results are presented as mean number of ultrasonic vocalizations recorded per minute of the trial, compared with saline-treated *Adnp* pup littermates (control). *Adnp* genotype of the pups was confirmed at the age of 30 days (Transnetyx, Memphis, Tennessee).

Developmental milestones: For ear twitch reflex, a cotton tip was gently brushed against the tip of the ear three times, between postnatal days 7-15 or until the pup responded correctly for two consecutive days (9). For air righting reflex, the pup was held up-side down and released ~10.5cm above the cage, containing 5 cm of shavings. The test was performed between postnatal days 8-21 or until the pup landed on the shavings with all four paws, for two consecutive days (9). For negative geotaxis, the pup was placed on a screen held at

an angle of 45° for a maximum duration of 30 seconds. The time required for the pup to turn around and climb up the screen was measured (seconds). The test was performed between postnatal days 1-14 or until the pup climbed up the screen (within the 30 seconds of the test), for two consecutive days (9-11). All tests were conducted between 10AM-4PM. For the first 5 postnatal days, each pup was put under a single 60-watt bulb during testing to assure the pups' warmth.

Gait analysis: The stand (sec) gait parameter represents the duration of contact with the glass plate of the print. The step cycle (sec) gait parameter represents the time in seconds between two consecutive initial contacts of the same paw. Step cycle is also equal to the sum of the stand and swing parameters. The single stance gait parameter represents the duration (in seconds) of ground contact for a single hind paw. It is used for gait analysis in pain models. In CatWalk XT, single stance is the part in the step cycle of a hind paw where the contralateral hind paw does not touch the glass plate. Swing (sec) or swing phase is the duration in seconds of no contact of a paw with the glass plate. Stride Length is the distance (in Distance Units) between successive placements of the same paw.

Object recognition: The test included two consecutive days of habituation (5 min per day) and the experimental day which consisted of the three phases. In phase 1 (habituation), the open field apparatus (50 × 50 cm) contained two identical objects (plastic or metal, 4 × 5 cm<sup>2</sup>) and a mouse was placed in the apparatus facing the wall and allowed to freely explore the objects (5 min). After 3 h in the home cage, the mouse was placed back into the apparatus for 3 min for phase 2 (short retention choice phase), during which one of the familiar objects was replaced with a novel object. Approximately 24 h after the completion of phase 2, the mouse was placed into the apparatus



for 3 min for phase 3 (long retention choice phase), during which one of the familiar objects was replaced with a novel object. The mouse was kept in its home cage between phases 2 and 3. The time spent sniffing/touching each object was measured. Mouse movement and exploratory behavior were tracked and recorded using the EthoVision XT video tracking system and software (Noldus Inc. Leesburg, VA). Data were analyzed using the discrimination capacity formula:  $D2 = (b-a)/(a+b)$ , where 'a' designated the time of exploration of the familiar object and 'b' designated the time of exploration of the novel object.

Social approach: A plexiglas box was divided into three adjacent chambers, each 20 cm (length) × 40.5 cm (width) × 22 cm (height), separated by two removable doors. Steel wire pencil cups (10.16 cm (diameter), 10.8 cm (height)), [www.kitchen-plus.com](http://www.kitchen-plus.com), were used as both containment for the target mice and as inanimate objects (weights prevented the mice from overturning the cups). Experiments were conducted in a dimly lit area during the light phase of the mouse. Target mice (males for males and females for females) were placed inside the wire cup in one of the side chambers for three 10-min sessions on the day before the test for habituation. The next day, each subject mouse was tested in an experiment with three phases, each 10-min long (measured with a simple timer): I and II, the habituation phases (ensuring no bias), and III, the experimental phase. No significant differences were noted between time periods spent in the different chambers in the habituation phase. In phase III, an empty wire cup (novel object) was placed in the center of the right or left chamber and the cup containing the target mouse was placed in the center of the other chamber. Location of the empty wire cup (novel object) and the novel mice were counterbalanced to avoid confounding side preference. The doors were then removed and a 10-min timer was initiated. The three-chamber apparatus was cleaned between mice. The social approach task was also used as habituation

for the social memory task, 3 h after the first phase (3-min exposure), the mouse was placed back into the apparatus for another 3 min (second phase), during which one cup contained the familiar mouse and the other contained a novel mouse. The positions of the familiar and novel mouse during phases 1 and 2 were counterbalanced within and between groups to exclude the possibility of positional effects but were kept the same for a given animal. Mouse movement and exploratory behavior were tracked and recorded using the EthoVision XT video tracking system and software (Noldus Inc. Leesburg, VA). The discrimination capacity (social memory) was analyzed using the formula:  $D2 = (b-a)/(b+a)$ .

Odor discrimination: Odors were presented on a suspended cotton swab to the test mouse placed into the clean cage with fresh shavings. Each mouse was tested during three consecutive 2-min periods for each odor, with 2-min intervals between presentations. The x axis indicates the consecutive number of the odor exposure period. The time that the mouse smelled the swab was recorded (beginning whenever the animal oriented its nostrils toward the cotton swab, within 2 cm or less).

**Table S17. Raw data for hippocampal spine subtype densities.**

**Spine columns are defined as follows:**

'Total' = Total density; 'Shaft' = Shaft synapse density

| Male <i>Adnp</i> <sup>+/+</sup> Saline |       | Female <i>Adnp</i> <sup>+/+</sup> Saline |       | Male <i>Adnp</i> <sup>+/+</sup> NAP |       | Female <i>Adnp</i> <sup>+/+</sup> NAP |       | Male <i>Adnp</i> <sup>+/-</sup> Saline |       | Female <i>Adnp</i> <sup>+/-</sup> Saline |       | Male <i>Adnp</i> <sup>+/-</sup> NAP |       | Female <i>Adnp</i> <sup>+/-</sup> NAP |       |
|----------------------------------------|-------|------------------------------------------|-------|-------------------------------------|-------|---------------------------------------|-------|----------------------------------------|-------|------------------------------------------|-------|-------------------------------------|-------|---------------------------------------|-------|
| Total                                  | Shaft | Total                                    | Shaft | Total                               | Shaft | Total                                 | Shaft | Total                                  | Shaft | Total                                    | Shaft | Total                               | Shaft | Total                                 | Shaft |
| 0.90                                   | 1.58  | 1.51                                     | 1.79  | 0.92                                | 1.94  | 2.42                                  | 1.64  | 1.24                                   | 2.59  | 0.94                                     | 1.58  | 1.37                                | 2.44  | 1.67                                  | 1.41  |
| 1.04                                   | 1.70  | 1.45                                     | 1.52  | 1.19                                | 1.53  | 2.23                                  | 1.57  | 0.92                                   | 2.94  | 1.35                                     | 1.72  | 0.65                                | 1.41  | 1.71                                  | 1.29  |
| 1.00                                   | 1.67  | 1.56                                     | 1.86  | 0.72                                | 1.96  | 1.28                                  | 1.47  | 1.12                                   | 2.54  | 0.91                                     | 1.71  | 1.34                                | 1.21  | 1.81                                  | 1.23  |
| 0.92                                   | 2.00  | 1.64                                     | 1.64  | 1.27                                | 1.44  | 0.66                                  | 1.83  | 0.72                                   | 2.70  | 1.09                                     | 1.30  | 0.91                                | 1.30  | 1.50                                  | 1.23  |
| 0.77                                   | 1.70  | 1.77                                     | 1.41  | 0.84                                | 1.43  | 1.75                                  | 1.58  | 0.92                                   | 2.74  | 1.55                                     | 1.26  | 1.25                                | 1.99  | 1.67                                  | 1.49  |
| 1.07                                   | 2.16  | 1.80                                     | 1.84  | 0.84                                | 1.46  | 1.93                                  | 1.74  | 1.36                                   | 2.51  | 1.48                                     | 1.41  | 0.92                                | 2.15  | 1.91                                  | 1.36  |
| 2.04                                   | 1.43  | 1.63                                     | 1.54  | 1.35                                | 1.86  | 0.88                                  | 1.64  | 0.47                                   | 2.61  | 1.12                                     | 2.17  | 0.77                                | 1.96  | 1.05                                  | 0.99  |
| 1.74                                   | 1.69  | 1.09                                     | 1.68  | 1.87                                | 1.30  | 1.39                                  | 1.56  | 1.10                                   | 2.09  | 0.54                                     | 1.71  | 0.69                                | 2.29  | 1.43                                  | 1.49  |
| 1.80                                   | 1.75  | 1.02                                     | 1.87  | 1.30                                | 1.26  | 0.43                                  | 1.38  | 0.70                                   | 2.38  | 1.13                                     | 1.56  | 0.66                                | 2.74  | 1.14                                  | 1.12  |
| 1.74                                   | 1.76  | 2.38                                     | 1.70  | 1.16                                | 2.01  | 1.39                                  | 1.09  | 0.95                                   | 3.54  | 1.21                                     | 2.09  | 0.85                                | 2.52  | 1.32                                  | 1.40  |
| 1.78                                   | 2.76  | 1.48                                     | 1.43  | 1.29                                |       | 1.74                                  | 1.50  | 0.95                                   | 3.61  | 0.83                                     | 1.90  | 0.89                                |       | 1.43                                  | 1.14  |
| 1.88                                   | 2.18  | 1.40                                     |       | 1.15                                |       | 1.54                                  | 1.78  | 0.78                                   | 2.96  | 1.28                                     | 1.98  | 0.87                                |       | 1.58                                  | 0.85  |
| 1.52                                   |       | 1.09                                     |       | 1.17                                |       | 1.79                                  | 1.73  | 0.51                                   | 1.99  | 1.41                                     | 2.49  | 0.74                                |       | 1.96                                  | 1.98  |
| 1.72                                   |       | 1.23                                     |       | 1.18                                |       | 1.38                                  | 1.32  | 0.67                                   | 1.72  | 0.68                                     | 2.42  | 1.08                                |       | 1.62                                  | 2.17  |
| 1.20                                   |       | 1.70                                     |       | 1.23                                |       | 1.41                                  | 1.28  | 0.82                                   | 2.45  | 1.40                                     | 2.12  | 1.58                                |       | 1.38                                  | 1.57  |
| 1.29                                   |       | 1.76                                     |       | 1.13                                |       | 1.47                                  | 1.32  | 0.93                                   |       | 1.79                                     | 2.07  | 1.47                                |       | 1.74                                  | 1.68  |
| 1.95                                   |       | 1.36                                     |       | 1.31                                |       | 1.82                                  | 1.54  | 0.80                                   |       | 1.49                                     | 2.31  | 1.11                                |       | 1.54                                  | 1.89  |
| 1.41                                   |       | 2.18                                     |       | 0.84                                |       | 1.54                                  | 1.45  | 0.95                                   |       | 1.06                                     | 1.30  | 1.05                                |       | 1.12                                  | 1.65  |
| 1.82                                   |       | 1.52                                     |       | 1.47                                |       | 1.26                                  | 1.63  | 0.66                                   |       | 0.75                                     | 1.99  | 0.67                                |       | 1.57                                  | 1.83  |
| 1.26                                   |       | 1.28                                     |       | 0.95                                |       | 1.40                                  | 1.85  | 0.51                                   |       | 0.93                                     |       | 0.81                                |       | 2.04                                  |       |
| 1.16                                   |       | 1.09                                     |       | 1.02                                |       | 1.37                                  | 1.57  | 0.62                                   |       | 1.07                                     |       | 0.69                                |       | 1.41                                  |       |
| 1.61                                   |       | 2.20                                     |       | 1.13                                |       | 1.45                                  | 1.44  | 0.59                                   |       | 0.94                                     |       | 0.78                                |       | 1.46                                  |       |
| 1.79                                   |       | 1.90                                     |       | 0.96                                |       | 0.63                                  | 1.51  | 0.60                                   |       | 1.55                                     |       | 0.63                                |       | 1.34                                  |       |
| 1.33                                   |       | 1.27                                     |       | 1.67                                |       | 1.56                                  | 1.39  | 0.62                                   |       | 0.74                                     |       | 0.93                                |       | 1.14                                  |       |
| 1.81                                   |       | 1.91                                     |       | 1.36                                |       | 1.69                                  | 1.57  | 0.97                                   |       | 2.14                                     |       | 0.69                                |       | 2.29                                  |       |
| 1.75                                   |       | 1.69                                     |       | 1.12                                |       | 1.13                                  | 1.45  | 0.89                                   |       | 1.63                                     |       | 1.54                                |       | 1.63                                  |       |

| Male <i>Adnp</i> <sup>+/+</sup> Saline |       | Female <i>Adnp</i> <sup>+/+</sup> Saline |       | Male <i>Adnp</i> <sup>+/+</sup> NAP |       | Female <i>Adnp</i> <sup>+/+</sup> NAP |       | Male <i>Adnp</i> <sup>+/-</sup> Saline |       | Female <i>Adnp</i> <sup>+/-</sup> Saline |       | Male <i>Adnp</i> <sup>+/-</sup> NAP |       | Female <i>Adnp</i> <sup>+/-</sup> NAP |       |
|----------------------------------------|-------|------------------------------------------|-------|-------------------------------------|-------|---------------------------------------|-------|----------------------------------------|-------|------------------------------------------|-------|-------------------------------------|-------|---------------------------------------|-------|
| Total                                  | Shaft | Total                                    | Shaft | Total                               | Shaft | Total                                 | Shaft | Total                                  | Shaft | Total                                    | Shaft | Total                               | Shaft | Total                                 | Shaft |
| 1.52                                   |       | 2.12                                     |       | 1.20                                |       | 1.40                                  |       | 0.72                                   |       | 1.59                                     |       | 1.15                                |       | 1.72                                  |       |
| 1.87                                   |       | 1.90                                     |       | 1.06                                |       | 1.31                                  |       | 0.52                                   |       | 0.89                                     |       | 1.24                                |       | 1.19                                  |       |
| 1.49                                   |       | 1.58                                     |       | 0.64                                |       | 1.22                                  |       | 1.05                                   |       | 0.73                                     |       | 0.90                                |       | 1.49                                  |       |
| 1.31                                   |       | 1.27                                     |       | 0.80                                |       | 1.31                                  |       | 0.78                                   |       | 1.55                                     |       | 1.51                                |       | 1.25                                  |       |
| 2.20                                   |       | 2.07                                     |       | 0.92                                |       | 1.66                                  |       | 0.33                                   |       | 0.49                                     |       | 1.27                                |       | 1.48                                  |       |
| 2.46                                   |       | 1.69                                     |       | 0.84                                |       | 2.03                                  |       | 0.72                                   |       | 0.52                                     |       | 1.32                                |       | 1.78                                  |       |
| 2.26                                   |       | 1.11                                     |       | 0.41                                |       | 1.32                                  |       | 0.80                                   |       | 1.37                                     |       | 1.21                                |       | 1.53                                  |       |
| 1.85                                   |       | 2.07                                     |       | 1.19                                |       | 0.81                                  |       | 0.84                                   |       | 1.06                                     |       | 0.98                                |       | 1.98                                  |       |
| 2.15                                   |       | 1.23                                     |       | 1.34                                |       | 2.01                                  |       | 1.05                                   |       | 1.48                                     |       | 0.71                                |       | 1.86                                  |       |
| 1.98                                   |       | 1.68                                     |       | 1.06                                |       | 1.08                                  |       | 0.66                                   |       | 1.10                                     |       | 1.01                                |       | 1.59                                  |       |
| 1.70                                   |       | 1.30                                     |       | 1.17                                |       | 0.93                                  |       | 1.03                                   |       | 1.11                                     |       | 0.82                                |       | 1.91                                  |       |
| 1.11                                   |       | 1.48                                     |       | 1.46                                |       | 2.13                                  |       | 0.83                                   |       | 1.11                                     |       | 1.07                                |       | 2.25                                  |       |
| 1.24                                   |       | 1.63                                     |       | 0.99                                |       | 2.01                                  |       | 1.22                                   |       | 1.46                                     |       | 1.08                                |       | 1.93                                  |       |
| 1.40                                   |       | 1.17                                     |       | 0.97                                |       | 2.27                                  |       | 0.64                                   |       | 1.12                                     |       | 0.80                                |       | 1.18                                  |       |
| 1.38                                   |       | 2.21                                     |       | 1.08                                |       | 2.15                                  |       | 0.58                                   |       | 1.08                                     |       | 1.27                                |       | 1.16                                  |       |
| 1.30                                   |       | 1.82                                     |       | 0.99                                |       | 2.11                                  |       | 0.66                                   |       | 1.11                                     |       | 1.11                                |       | 1.26                                  |       |
| 1.60                                   |       | 1.66                                     |       | 1.56                                |       | 2.16                                  |       | 1.75                                   |       | 1.66                                     |       | 1.02                                |       | 1.98                                  |       |
| 1.81                                   |       | 0.77                                     |       | 1.49                                |       | 1.81                                  |       | 1.22                                   |       | 1.37                                     |       | 1.12                                |       | 2.10                                  |       |
| 1.72                                   |       | 1.60                                     |       | 1.17                                |       | 1.77                                  |       | 1.23                                   |       | 1.35                                     |       | 1.54                                |       | 1.58                                  |       |
| 1.88                                   |       | 1.49                                     |       | 1.73                                |       | 1.44                                  |       | 1.29                                   |       |                                          |       | 1.36                                |       |                                       |       |
| 1.27                                   |       | 1.48                                     |       | 1.68                                |       | 1.32                                  |       | 0.60                                   |       |                                          |       | 1.31                                |       |                                       |       |
| 2.10                                   |       | 1.46                                     |       | 1.19                                |       | 1.99                                  |       | 1.03                                   |       |                                          |       | 1.30                                |       |                                       |       |
| 1.68                                   |       |                                          |       | 1.90                                |       | 1.28                                  |       | 1.61                                   |       |                                          |       | 1.51                                |       |                                       |       |
| 1.27                                   |       |                                          |       | 1.64                                |       |                                       |       | 1.41                                   |       |                                          |       | 1.14                                |       |                                       |       |
| 1.31                                   |       |                                          |       | 1.33                                |       |                                       |       | 1.94                                   |       |                                          |       | 1.31                                |       |                                       |       |
| 1.47                                   |       |                                          |       | 1.49                                |       |                                       |       | 1.39                                   |       |                                          |       | 1.22                                |       |                                       |       |
| 1.66                                   |       |                                          |       | 1.24                                |       |                                       |       | 1.32                                   |       |                                          |       | 1.08                                |       |                                       |       |
| 1.25                                   |       |                                          |       | 2.17                                |       |                                       |       | 1.62                                   |       |                                          |       | 1.41                                |       |                                       |       |
| 1.45                                   |       |                                          |       | 1.91                                |       |                                       |       | 1.55                                   |       |                                          |       | 1.77                                |       |                                       |       |
| 1.34                                   |       |                                          |       | 1.90                                |       |                                       |       | 0.53                                   |       |                                          |       | 1.73                                |       |                                       |       |

| Male <i>Adnp<sup>+/+</sup></i> Saline |       | Female <i>Adnp<sup>+/+</sup></i> Saline |       | Male <i>Adnp<sup>+/+</sup></i> NAP |       | Female <i>Adnp<sup>+/+</sup></i> NAP |       | Male <i>Adnp<sup>+/-</sup></i> Saline |       | Female <i>Adnp<sup>+/-</sup></i> Saline |       | Male <i>Adnp<sup>+/-</sup></i> NAP |       | Female <i>Adnp<sup>+/-</sup></i> NAP |       |
|---------------------------------------|-------|-----------------------------------------|-------|------------------------------------|-------|--------------------------------------|-------|---------------------------------------|-------|-----------------------------------------|-------|------------------------------------|-------|--------------------------------------|-------|
| Total                                 | Shaft | Total                                   | Shaft | Total                              | Shaft | Total                                | Shaft | Total                                 | Shaft | Total                                   | Shaft | Total                              | Shaft | Total                                | Shaft |
| 1.38                                  |       |                                         |       | 1.83                               |       |                                      |       | 1.34                                  |       |                                         |       | 1.31                               |       |                                      |       |
| 1.65                                  |       |                                         |       | 1.35                               |       |                                      |       | 1.17                                  |       |                                         |       | 0.98                               |       |                                      |       |
| 1.46                                  |       |                                         |       | 1.93                               |       |                                      |       | 1.46                                  |       |                                         |       | 1.17                               |       |                                      |       |
| 1.32                                  |       |                                         |       | 0.83                               |       |                                      |       | 1.61                                  |       |                                         |       | 0.94                               |       |                                      |       |
| 1.28                                  |       |                                         |       | 0.90                               |       |                                      |       | 1.14                                  |       |                                         |       | 0.91                               |       |                                      |       |
| 1.36                                  |       |                                         |       | 1.27                               |       |                                      |       | 0.79                                  |       |                                         |       | 0.99                               |       |                                      |       |
| 1.38                                  |       |                                         |       | 1.48                               |       |                                      |       | 1.21                                  |       |                                         |       | 1.28                               |       |                                      |       |
| 1.36                                  |       |                                         |       |                                    |       |                                      |       | 1.34                                  |       |                                         |       | 1.43                               |       |                                      |       |
| 1.48                                  |       |                                         |       |                                    |       |                                      |       | 0.42                                  |       |                                         |       | 1.61                               |       |                                      |       |
| 1.45                                  |       |                                         |       |                                    |       |                                      |       | 1.06                                  |       |                                         |       | 1.58                               |       |                                      |       |
| 1.39                                  |       |                                         |       |                                    |       |                                      |       | 0.98                                  |       |                                         |       | 0.74                               |       |                                      |       |
| 1.18                                  |       |                                         |       |                                    |       |                                      |       | 1.00                                  |       |                                         |       | 1.81                               |       |                                      |       |
| 1.19                                  |       |                                         |       |                                    |       |                                      |       | 1.02                                  |       |                                         |       | 1.42                               |       |                                      |       |
| 1.45                                  |       |                                         |       |                                    |       |                                      |       | 1.49                                  |       |                                         |       | 1.17                               |       |                                      |       |
| 1.42                                  |       |                                         |       |                                    |       |                                      |       | 0.76                                  |       |                                         |       | 2.27                               |       |                                      |       |
| 1.26                                  |       |                                         |       |                                    |       |                                      |       | 1.06                                  |       |                                         |       | 2.18                               |       |                                      |       |
| 1.28                                  |       |                                         |       |                                    |       |                                      |       | 0.86                                  |       |                                         |       | 1.21                               |       |                                      |       |
| 1.42                                  |       |                                         |       |                                    |       |                                      |       | 1.17                                  |       |                                         |       |                                    |       |                                      |       |
| 1.41                                  |       |                                         |       |                                    |       |                                      |       | 1.02                                  |       |                                         |       |                                    |       |                                      |       |
| 1.65                                  |       |                                         |       |                                    |       |                                      |       |                                       |       |                                         |       |                                    |       |                                      |       |
| 1.22                                  |       |                                         |       |                                    |       |                                      |       |                                       |       |                                         |       |                                    |       |                                      |       |
| 2.56                                  |       |                                         |       |                                    |       |                                      |       |                                       |       |                                         |       |                                    |       |                                      |       |
| 1.29                                  |       |                                         |       |                                    |       |                                      |       |                                       |       |                                         |       |                                    |       |                                      |       |
| 1.67                                  |       |                                         |       |                                    |       |                                      |       |                                       |       |                                         |       |                                    |       |                                      |       |
| 1.20                                  |       |                                         |       |                                    |       |                                      |       |                                       |       |                                         |       |                                    |       |                                      |       |
| 2.96                                  |       |                                         |       |                                    |       |                                      |       |                                       |       |                                         |       |                                    |       |                                      |       |
| 2.19                                  |       |                                         |       |                                    |       |                                      |       |                                       |       |                                         |       |                                    |       |                                      |       |
| 1.82                                  |       |                                         |       |                                    |       |                                      |       |                                       |       |                                         |       |                                    |       |                                      |       |

**Table S18. Raw data for hippocampal spine subtype densities.**

**Spine columns are defined as follows:**

'M' = Mushroom density; 'S' = Stubby density; 'Th' = Thin density; 'Vol' = PSD95 volume

| Male <i>Adnp</i> <sup>+/+</sup> Saline |      |      |      | Female <i>Adnp</i> <sup>+/+</sup> Saline |      |      |      | Male <i>Adnp</i> <sup>+/+</sup> NAP |      |      |      | Female <i>Adnp</i> <sup>+/+</sup> NAP |      |      |      | Male <i>Adnp</i> <sup>+/-</sup> Saline |      |      |      | Female <i>Adnp</i> <sup>+/-</sup> Saline |      |      |      | Male <i>Adnp</i> <sup>+/-</sup> NAP |      |      |      | Female <i>Adnp</i> <sup>+/-</sup> NAP |      |      |      |   |   |    |     |   |   |    |     |
|----------------------------------------|------|------|------|------------------------------------------|------|------|------|-------------------------------------|------|------|------|---------------------------------------|------|------|------|----------------------------------------|------|------|------|------------------------------------------|------|------|------|-------------------------------------|------|------|------|---------------------------------------|------|------|------|---|---|----|-----|---|---|----|-----|
| M                                      | S    | Th   | Vol  | M                                        | S    | Th   | Vol  | M                                   | S    | Th   | Vol  | M                                     | S    | Th   | Vol  | M                                      | S    | Th   | Vol  | M                                        | S    | Th   | Vol  | M                                   | S    | Th   | Vol  | M                                     | S    | Th   | Vol  | M | S | Th | Vol | M | S | Th | Vol |
| 0.52                                   | 0.21 | 0.17 | 0.24 | 0.34                                     | 0.45 | 0.72 | 0.49 | 0.52                                | 0.16 | 0.23 | 0.30 | 1.21                                  | 1.02 | 0.19 | 0.70 | 0.26                                   | 0.20 | 0.79 | 0.33 | 0.42                                     | 0.35 | 0.17 | 0.60 | 0.88                                | 0.11 | 0.39 | 0.30 | 0.87                                  | 0.50 | 0.30 | 0.53 |   |   |    |     |   |   |    |     |
| 0.45                                   | 0.14 | 0.45 | 0.25 | 0.46                                     | 0.19 | 0.80 | 0.47 | 0.80                                | 0.14 | 0.25 | 0.31 | 0.91                                  | 1.02 | 0.30 | 0.60 | 0.28                                   | 0.15 | 0.49 | 0.43 | 0.53                                     | 0.26 | 0.56 | 0.44 | 0.25                                | 0.22 | 0.18 | 0.17 | 0.65                                  | 0.52 | 0.55 | 0.47 |   |   |    |     |   |   |    |     |
| 0.51                                   | 0.22 | 0.26 | 0.22 | 0.37                                     | 0.37 | 0.81 | 0.48 | 0.58                                | 0.00 | 0.14 | 0.22 | 0.77                                  | 0.09 | 0.43 | 0.61 | 0.30                                   | 0.21 | 0.61 | 0.37 | 0.28                                     | 0.14 | 0.49 | 0.49 | 0.79                                | 0.12 | 0.43 | 0.33 | 0.89                                  | 0.30 | 0.63 | 0.53 |   |   |    |     |   |   |    |     |
| 0.44                                   | 0.18 | 0.29 | 0.24 | 0.92                                     | 0.41 | 0.32 | 0.40 | 0.92                                | 0.14 | 0.22 | 0.28 | 0.29                                  | 0.07 | 0.29 | 0.57 | 0.09                                   | 0.09 | 0.54 | 0.37 | 0.40                                     | 0.40 | 0.30 | 0.71 | 0.54                                | 0.13 | 0.23 | 0.31 | 0.81                                  | 0.44 | 0.26 | 0.50 |   |   |    |     |   |   |    |     |
| 0.33                                   | 0.18 | 0.26 | 0.28 | 0.66                                     | 0.51 | 0.59 | 0.55 | 0.59                                | 0.09 | 0.16 | 0.26 | 0.61                                  | 0.86 | 0.29 | 0.48 | 0.23                                   | 0.17 | 0.52 | 0.32 | 0.64                                     | 0.53 | 0.38 | 0.58 | 0.63                                | 0.09 | 0.54 | 0.32 | 0.87                                  | 0.47 | 0.33 | 0.63 |   |   |    |     |   |   |    |     |
| 0.55                                   | 0.29 | 0.22 | 0.20 | 0.81                                     | 0.33 | 0.66 | 0.56 | 0.67                                | 0.11 | 0.07 | 0.31 | 0.82                                  | 0.85 | 0.26 | 0.58 | 0.59                                   | 0.10 | 0.66 | 0.31 | 0.53                                     | 0.38 | 0.57 | 0.67 | 0.55                                | 0.16 | 0.21 | 0.34 | 0.71                                  | 0.41 | 0.79 | 0.73 |   |   |    |     |   |   |    |     |
| 1.06                                   | 0.37 | 0.62 | 0.18 | 0.95                                     | 0.26 | 0.42 | 0.48 | 1.06                                | 0.20 | 0.10 | 0.45 | 0.27                                  | 0.31 | 0.31 | 0.53 | 0.27                                   | 0.03 | 0.17 | 0.45 | 0.39                                     | 0.50 | 0.23 | 0.44 | 0.39                                | 0.09 | 0.30 | 0.44 | 0.59                                  | 0.21 | 0.24 | 0.60 |   |   |    |     |   |   |    |     |
| 1.04                                   | 0.40 | 0.30 | 0.18 | 0.74                                     | 0.16 | 0.19 | 0.50 | 1.55                                | 0.29 | 0.03 | 0.33 | 0.75                                  | 0.28 | 0.36 | 0.41 | 0.36                                   | 0.12 | 0.62 | 0.49 | 0.23                                     | 0.19 | 0.12 | 0.53 | 0.48                                | 0.12 | 0.09 | 0.55 | 0.51                                  | 0.44 | 0.48 | 0.73 |   |   |    |     |   |   |    |     |
| 0.61                                   | 0.36 | 0.83 | 0.19 | 0.24                                     | 0.63 | 0.16 | 0.42 | 1.02                                | 0.16 | 0.13 | 0.24 | 0.04                                  | 0.14 | 0.25 | 0.54 | 0.38                                   | 0.08 | 0.24 | 0.36 | 0.45                                     | 0.41 | 0.26 | 0.60 | 0.45                                | 0.06 | 0.15 | 0.43 | 0.57                                  | 0.24 | 0.34 | 0.56 |   |   |    |     |   |   |    |     |
| 1.04                                   | 0.30 | 0.40 | 0.18 | 0.58                                     | 0.54 | 1.26 | 0.58 | 0.84                                | 0.13 | 0.19 | 0.27 | 0.44                                  | 0.62 | 0.33 | 0.63 | 0.27                                   | 0.31 | 0.38 | 0.34 | 0.68                                     | 0.16 | 0.37 | 0.62 | 0.41                                | 0.15 | 0.29 | 0.56 | 0.42                                  | 0.63 | 0.27 | 0.90 |   |   |    |     |   |   |    |     |
| 0.90                                   | 0.27 | 0.60 | 0.23 | 0.22                                     | 0.85 | 0.41 | 0.51 | 0.86                                | 0.19 | 0.24 |      | 0.58                                  | 0.99 | 0.17 | 0.47 | 0.48                                   | 0.07 | 0.41 | 0.38 | 0.34                                     | 0.15 | 0.34 | 0.56 | 0.48                                | 0.24 | 0.17 |      | 0.43                                  | 0.47 | 0.54 | 0.67 |   |   |    |     |   |   |    |     |
| 1.20                                   | 0.25 | 0.43 | 0.27 | 0.30                                     | 0.58 | 0.52 |      | 0.86                                | 0.26 | 0.03 |      | 0.48                                  | 0.20 | 0.85 | 0.59 | 0.29                                   | 0.10 | 0.39 |      | 0.49                                     | 0.26 | 0.53 | 0.63 | 0.52                                | 0.17 | 0.17 |      | 0.56                                  | 0.11 | 0.90 | 0.54 |   |   |    |     |   |   |    |     |
| 0.90                                   | 0.38 | 0.24 |      | 0.26                                     | 0.42 | 0.42 |      | 0.99                                | 0.07 | 0.11 |      | 0.99                                  | 0.43 | 0.37 | 0.78 | 0.16                                   | 0.13 | 0.23 |      | 0.61                                     | 0.44 | 0.36 | 0.49 | 0.43                                | 0.06 | 0.25 |      | 0.92                                  | 0.42 | 0.61 | 0.73 |   |   |    |     |   |   |    |     |
| 0.96                                   | 0.34 | 0.41 |      | 0.48                                     | 0.48 | 0.26 |      | 0.89                                | 0.14 | 0.14 |      | 0.90                                  | 0.30 | 0.19 | 0.09 | 0.26                                   | 0.06 | 0.35 |      | 0.31                                     | 0.06 | 0.31 | 0.71 | 0.68                                | 0.07 | 0.34 |      | 0.50                                  | 0.47 | 0.65 | 0.79 |   |   |    |     |   |   |    |     |
| 0.78                                   | 0.24 | 0.18 |      | 0.74                                     | 0.57 | 0.39 |      | 0.95                                | 0.25 | 0.03 |      | 0.84                                  | 0.30 | 0.27 | 0.55 | 0.41                                   | 0.15 | 0.26 |      | 0.70                                     | 0.32 | 0.38 | 0.73 | 0.95                                | 0.11 | 0.53 |      | 0.46                                  | 0.46 | 0.46 | 0.77 |   |   |    |     |   |   |    |     |
| 0.41                                   | 0.58 | 0.31 |      | 1.01                                     | 0.36 | 0.40 |      | 0.86                                | 0.03 | 0.25 |      | 0.74                                  | 0.44 | 0.29 | 0.56 | 0.25                                   | 0.14 | 0.54 |      | 1.01                                     | 0.30 | 0.48 | 0.50 | 1.01                                | 0.17 | 0.29 |      | 0.76                                  | 0.84 | 0.15 | 0.54 |   |   |    |     |   |   |    |     |
| 0.31                                   | 1.08 | 0.56 |      | 0.69                                     | 0.32 | 0.35 |      | 0.79                                | 0.13 | 0.39 |      | 0.90                                  | 0.72 | 0.21 |      | 0.35                                   | 0.17 | 0.28 |      | 0.78                                     | 0.15 | 0.56 | 0.53 | 0.72                                | 0.09 | 0.30 |      | 0.31                                  | 0.59 | 0.63 | 0.67 |   |   |    |     |   |   |    |     |
| 0.74                                   | 0.56 | 0.11 |      | 1.48                                     | 0.33 | 0.37 |      | 0.27                                | 0.44 | 0.14 |      | 0.60                                  | 0.57 | 0.38 |      | 0.50                                   | 0.07 | 0.39 |      | 0.59                                     | 0.19 | 0.28 | 0.51 | 0.84                                | 0.14 | 0.07 |      | 0.63                                  | 0.28 | 0.21 | 0.73 |   |   |    |     |   |   |    |     |
| 0.64                                   | 0.37 | 0.81 |      | 0.76                                     | 0.34 | 0.42 |      | 0.95                                | 0.06 | 0.46 |      | 0.63                                  | 0.39 | 0.24 |      | 0.42                                   | 0.08 | 0.17 |      | 0.28                                     | 0.06 | 0.41 |      | 0.51                                | 0.10 | 0.06 |      | 0.52                                  | 0.69 | 0.36 |      |   |   |    |     |   |   |    |     |
| 0.60                                   | 0.28 | 0.39 |      | 0.59                                     | 0.26 | 0.44 |      | 0.66                                | 0.16 | 0.13 |      | 0.36                                  | 0.84 | 0.20 |      | 0.26                                   | 0.07 | 0.18 |      | 0.45                                     | 0.41 | 0.07 |      | 0.39                                | 0.24 | 0.18 |      | 0.53                                  | 1.48 | 0.04 |      |   |   |    |     |   |   |    |     |
| 0.61                                   | 0.13 | 0.42 |      | 0.35                                     | 0.39 | 0.35 |      | 0.80                                | 0.14 | 0.08 |      | 0.69                                  | 0.50 | 0.19 |      | 0.20                                   | 0.20 | 0.23 |      | 0.45                                     | 0.16 | 0.45 |      | 0.56                                | 0.10 | 0.03 |      | 0.33                                  | 0.48 | 0.60 |      |   |   |    |     |   |   |    |     |
| 0.92                                   | 0.37 | 0.33 |      | 0.71                                     | 0.62 | 0.87 |      | 0.53                                | 0.20 | 0.40 |      | 0.68                                  | 0.32 | 0.44 |      | 0.22                                   | 0.25 | 0.12 |      | 0.53                                     | 0.17 | 0.25 |      | 0.69                                | 0.09 | 0.00 |      | 0.87                                  | 0.40 | 0.20 |      |   |   |    |     |   |   |    |     |
| 0.99                                   | 0.22 | 0.58 |      | 0.45                                     | 0.84 | 0.62 |      | 0.69                                | 0.06 | 0.21 |      | 0.19                                  | 0.37 | 0.07 |      | 0.35                                   | 0.04 | 0.21 |      | 0.54                                     | 0.58 | 0.43 |      | 0.51                                | 0.09 | 0.03 |      | 0.65                                  | 0.47 | 0.22 |      |   |   |    |     |   |   |    |     |
| 0.88                                   | 0.14 | 0.31 |      | 0.49                                     | 0.19 | 0.59 |      | 1.18                                | 0.26 | 0.23 |      | 0.89                                  | 0.48 | 0.19 |      | 0.29                                   | 0.03 | 0.29 |      | 0.37                                     | 0.15 | 0.21 |      | 0.77                                | 0.13 | 0.03 |      | 0.66                                  | 0.29 | 0.18 |      |   |   |    |     |   |   |    |     |
| 1.12                                   | 0.41 | 0.27 |      | 0.94                                     | 0.41 | 0.56 |      | 0.99                                | 0.12 | 0.25 |      | 0.70                                  | 0.33 | 0.66 |      | 0.58                                   | 0.18 | 0.22 |      | 0.71                                     | 0.39 | 1.04 |      | 0.43                                | 0.10 | 0.17 |      | 1.21                                  | 0.54 | 0.54 |      |   |   |    |     |   |   |    |     |
| 0.99                                   | 0.49 | 0.26 |      | 0.86                                     | 0.52 | 0.31 |      | 0.52                                | 0.08 | 0.52 |      | 0.42                                  | 0.34 | 0.38 |      | 0.60                                   | 0.16 | 0.13 |      | 0.38                                     | 0.56 | 0.69 |      | 1.11                                | 0.07 | 0.37 |      | 0.63                                  | 0.43 | 0.57 |      |   |   |    |     |   |   |    |     |
| 0.95                                   | 0.22 | 0.35 |      | 1.08                                     | 0.66 | 0.39 |      | 0.73                                | 0.15 | 0.33 |      | 0.68                                  | 0.30 | 0.42 |      | 0.20                                   | 0.20 | 0.33 |      | 0.59                                     | 0.66 | 0.35 |      | 0.61                                | 0.07 | 0.47 |      | 0.70                                  | 0.56 | 0.46 |      |   |   |    |     |   |   |    |     |
| 0.95                                   | 0.37 | 0.54 |      | 0.76                                     | 0.53 | 0.61 |      | 0.44                                | 0.31 | 0.31 |      | 0.43                                  | 0.72 | 0.16 |      | 0.21                                   | 0.07 | 0.24 |      | 0.55                                     | 0.26 | 0.07 |      | 0.94                                | 0.12 | 0.18 |      | 0.60                                  | 0.35 | 0.25 |      |   |   |    |     |   |   |    |     |
| 1.05                                   | 0.27 | 0.17 |      | 0.86                                     | 0.38 | 0.34 |      | 0.46                                | 0.07 | 0.11 |      | 0.45                                  | 0.23 | 0.54 |      | 0.46                                   | 0.20 | 0.39 |      | 0.24                                     | 0.24 | 0.24 |      | 0.67                                | 0.06 | 0.16 |      | 0.88                                  | 0.27 | 0.34 |      |   |   |    |     |   |   |    |     |
| 0.92                                   | 0.18 | 0.21 |      | 0.65                                     | 0.42 | 0.20 |      | 0.47                                | 0.23 | 0.10 |      | 0.69                                  | 0.25 | 0.36 |      | 0.46                                   | 0.12 | 0.20 |      | 0.55                                     | 0.80 | 0.20 |      | 1.07                                | 0.13 | 0.30 |      | 0.53                                  | 0.38 | 0.34 |      |   |   |    |     |   |   |    |     |

| Male <i>Adnp</i> <sup>+/+</sup> Saline |      |      |     | Female <i>Adnp</i> <sup>+/+</sup> Saline |      |      |     | Male <i>Adnp</i> <sup>+/+</sup> NAP |      |      |     | Female <i>Adnp</i> <sup>+/+</sup> NAP |      |      |      | Male <i>Adnp</i> <sup>+/-</sup> Saline |      |      |     | Female <i>Adnp</i> <sup>+/-</sup> Saline |      |      |      | Male <i>Adnp</i> <sup>+/-</sup> NAP |      |      |     | Female <i>Adnp</i> <sup>+/-</sup> NAP |      |      |     |   |   |    |     |
|----------------------------------------|------|------|-----|------------------------------------------|------|------|-----|-------------------------------------|------|------|-----|---------------------------------------|------|------|------|----------------------------------------|------|------|-----|------------------------------------------|------|------|------|-------------------------------------|------|------|-----|---------------------------------------|------|------|-----|---|---|----|-----|
| M                                      | S    | Th   | Vol | M                                        | S    | Th   | Vol | M                                   | S    | Th   | Vol | M                                     | S    | Th   | Vol  | M                                      | S    | Th   | Vol | M                                        | S    | Th   | Vol  | M                                   | S    | Th   | Vol | M                                     | S    | Th   | Vol | M | S | Th | Vol |
| 0.60                                   | 0.33 | 1.27 |     | 0.64                                     | 0.74 | 0.69 |     | 0.56                                | 0.23 | 0.13 |     | 1.06                                  | 0.30 | 0.30 |      | 0.22                                   | 0.07 | 0.04 |     | 0.23                                     | 0.19 | 0.08 |      | 0.96                                | 0.18 | 0.14 |     | 0.56                                  | 0.56 | 0.37 |     |   |   |    |     |
| 0.53                                   | 0.67 | 1.26 |     | 1.13                                     | 0.28 | 0.28 |     | 0.68                                | 0.06 | 0.10 |     | 1.15                                  | 0.80 | 0.07 |      | 0.38                                   | 0.04 | 0.30 |     | 0.31                                     | 0.10 | 0.10 |      | 0.97                                | 0.10 | 0.24 |     | 0.65                                  | 0.48 | 0.65 |     |   |   |    |     |
| 0.46                                   | 0.46 | 1.33 |     | 0.64                                     | 0.18 | 0.29 |     | 0.28                                | 0.07 | 0.07 |     | 0.73                                  | 0.14 | 0.46 |      | 0.39                                   | 0.03 | 0.39 |     | 0.43                                     | 0.50 | 0.43 |      | 0.86                                | 0.07 | 0.28 |     | 0.33                                  | 0.33 | 0.87 |     |   |   |    |     |
| 0.53                                   | 0.37 | 0.95 |     | 0.77                                     | 1.04 | 0.27 |     | 0.64                                | 0.03 | 0.52 |     | 0.46                                  | 0.11 | 0.25 |      | 0.31                                   | 0.14 | 0.39 |     | 0.19                                     | 0.49 | 0.38 |      | 0.70                                | 0.05 | 0.23 |     | 0.34                                  | 0.42 | 1.22 |     |   |   |    |     |
| 0.62                                   | 0.56 | 0.97 |     | 0.51                                     | 0.47 | 0.25 |     | 1.18                                | 0.00 | 0.16 |     | 1.13                                  | 0.26 | 0.62 |      | 0.54                                   | 0.09 | 0.42 |     | 0.30                                     | 0.82 | 0.35 |      | 0.43                                | 0.12 | 0.15 |     | 0.61                                  | 0.30 | 0.94 |     |   |   |    |     |
| 0.50                                   | 0.45 | 1.04 |     | 0.79                                     | 0.79 | 0.11 |     | 0.80                                | 0.04 | 0.22 |     | 0.34                                  | 0.64 | 0.10 |      | 0.37                                   | 0.11 | 0.18 |     | 0.38                                     | 0.30 | 0.42 |      | 0.82                                | 0.06 | 0.12 |     | 0.39                                  | 0.32 | 0.88 |     |   |   |    |     |
| 0.11                                   | 0.66 | 0.93 |     | 0.76                                     | 0.15 | 0.38 |     | 0.71                                | 0.19 | 0.26 |     | 0.46                                  | 0.18 | 0.29 |      | 0.85                                   | 0.15 | 0.03 |     | 0.66                                     | 0.31 | 0.13 |      | 0.50                                | 0.04 | 0.28 |     | 0.52                                  | 0.28 | 1.11 |     |   |   |    |     |
| 0.26                                   | 0.37 | 0.48 |     | 0.48                                     | 0.34 | 0.67 |     | 0.95                                | 0.13 | 0.39 |     | 0.86                                  | 0.62 | 0.65 |      | 0.32                                   | 0.41 | 0.10 |     | 0.46                                     | 0.21 | 0.43 |      | 0.74                                | 0.03 | 0.30 |     | 0.80                                  | 0.55 | 0.90 |     |   |   |    |     |
| 0.20                                   | 0.40 | 0.64 |     | 1.06                                     | 0.39 | 0.18 |     | 0.45                                | 0.09 | 0.45 |     | 1.13                                  | 0.32 | 0.57 |      | 0.66                                   | 0.38 | 0.19 |     | 0.82                                     | 0.25 | 0.38 |      | 0.61                                | 0.11 | 0.36 |     | 0.89                                  | 0.32 | 0.71 |     |   |   |    |     |
| 0.19                                   | 0.43 | 0.77 |     | 0.22                                     | 0.47 | 0.47 |     | 0.60                                | 0.26 | 0.11 |     | 0.94                                  | 0.59 | 0.73 |      | 0.27                                   | 0.17 | 0.20 |     | 0.63                                     | 0.23 | 0.26 |      | 0.58                                | 0.16 | 0.06 |     | 0.27                                  | 0.24 | 0.67 |     |   |   |    |     |
| 0.28                                   | 0.37 | 0.74 |     | 0.58                                     | 1.40 | 0.23 |     | 0.68                                | 0.36 | 0.04 |     | 1.02                                  | 0.72 | 0.41 |      | 0.24                                   | 0.20 | 0.14 |     | 0.65                                     | 0.22 | 0.22 |      | 0.82                                | 0.10 | 0.34 |     | 0.50                                  | 0.29 | 0.37 |     |   |   |    |     |
| 0.15                                   | 0.41 | 0.75 |     | 0.54                                     | 0.74 | 0.54 |     | 0.67                                | 0.32 | 0.00 |     | 0.97                                  | 1.06 | 0.08 |      | 0.17                                   | 0.28 | 0.22 |     | 0.33                                     | 0.59 | 0.18 |      | 0.66                                | 0.10 | 0.35 |     | 0.52                                  | 0.48 | 0.26 |     |   |   |    |     |
| 0.18                                   | 0.53 | 0.89 |     | 0.87                                     | 0.36 | 0.43 |     | 0.74                                | 0.71 | 0.12 |     | 1.25                                  | 0.46 | 0.46 |      | 0.11                                   | 0.34 | 1.30 |     | 0.65                                     | 0.54 | 0.47 |      | 0.77                                | 0.04 | 0.21 |     | 0.40                                  | 0.74 | 0.84 |     |   |   |    |     |
| 0.34                                   | 0.68 | 0.79 |     | 0.34                                     | 0.10 | 0.34 |     | 0.98                                | 0.40 | 0.11 |     | 0.57                                  | 0.68 | 0.57 |      | 0.25                                   | 0.30 | 0.66 |     | 0.79                                     | 0.35 | 0.23 |      | 0.67                                | 0.13 | 0.32 |     | 1.13                                  | 0.19 | 0.79 |     |   |   |    |     |
| 0.31                                   | 0.42 | 0.99 |     | 1.02                                     | 0.40 | 0.18 |     | 0.81                                | 0.36 | 0.00 |     | 0.44                                  | 0.94 | 0.39 |      | 0.33                                   | 0.25 | 0.66 |     | 0.64                                     | 0.35 | 0.35 |      | 0.93                                | 0.07 | 0.54 |     | 0.37                                  | 0.37 | 0.83 |     |   |   |    |     |
| 0.36                                   | 0.56 | 0.97 |     | 0.63                                     | 0.63 | 0.22 |     | 1.09                                | 0.55 | 0.10 |     | 0.76                                  | 0.47 | 0.22 |      | 0.30                                   | 0.38 | 0.61 |     |                                          |      |      |      | 0.89                                | 0.07 | 0.39 |     |                                       |      |      |     |   |   |    |     |
| 0.27                                   | 0.46 | 0.54 |     | 0.35                                     | 0.60 | 0.54 |     | 0.77                                | 0.91 | 0.00 |     | 0.62                                  | 0.35 | 0.35 |      | 0.14                                   | 0.21 | 0.25 |     |                                          |      |      |      | 0.89                                | 0.06 | 0.35 |     |                                       |      |      |     |   |   |    |     |
| 1.51                                   | 0.18 | 0.40 |     | 1.01                                     | 0.22 | 0.22 |     | 0.87                                | 0.28 | 0.04 |     | 0.60                                  | 0.50 | 0.90 |      | 0.32                                   | 0.29 | 0.42 |     |                                          |      |      |      | 0.76                                | 0.19 | 0.35 |     |                                       |      |      |     |   |   |    |     |
| 1.22                                   | 0.17 | 0.28 |     |                                          |      |      |     | 1.16                                | 0.61 | 0.12 |     | 0.53                                  | 0.45 | 0.30 |      | 0.38                                   | 0.38 | 0.85 |     |                                          |      |      |      | 0.45                                | 0.30 | 0.75 |     |                                       |      |      |     |   |   |    |     |
| 1.02                                   | 0.13 | 0.13 |     |                                          |      |      |     | 0.96                                | 0.38 | 0.31 |     |                                       |      |      |      | 0.22                                   | 0.22 | 0.96 |     |                                          |      |      |      | 0.40                                | 0.34 | 0.40 |     |                                       |      |      |     |   |   |    |     |
| 1.13                                   | 0.14 | 0.03 |     |                                          |      |      |     | 0.77                                | 0.21 | 0.35 |     |                                       |      |      |      | 0.36                                   | 0.57 | 1.01 |     |                                          |      |      |      | 0.26                                | 0.31 | 0.73 |     |                                       |      |      |     |   |   |    |     |
| 1.04                                   | 0.31 | 0.12 |     |                                          |      |      |     | 0.73                                | 0.44 | 0.33 |     |                                       |      |      |      | 0.22                                   | 0.50 | 0.67 |     |                                          |      |      |      | 0.32                                | 0.27 | 0.63 |     |                                       |      |      |     |   |   |    |     |
| 1.28                                   | 0.10 | 0.28 |     |                                          |      |      |     | 0.58                                | 0.35 | 0.31 |     |                                       |      |      |      | 0.26                                   | 0.42 | 0.63 |     |                                          |      |      |      | 0.24                                | 0.36 | 0.48 |     |                                       |      |      |     |   |   |    |     |
| 0.97                                   | 0.11 | 0.18 |     |                                          |      |      |     | 0.66                                | 0.74 | 0.78 |     |                                       |      |      |      | 0.35                                   | 0.41 | 0.86 |     |                                          |      |      |      | 0.27                                | 0.35 | 0.78 |     |                                       |      |      |     |   |   |    |     |
| 0.93                                   | 0.14 | 0.38 |     |                                          |      |      |     | 0.64                                | 0.70 | 0.57 |     |                                       |      |      |      | 0.74                                   | 0.67 | 0.14 |     |                                          |      |      |      | 0.34                                | 0.42 | 1.01 |     |                                       |      |      |     |   |   |    |     |
| 1.09                                   | 0.07 | 0.18 |     |                                          |      |      |     | 0.57                                | 0.87 | 0.46 |     |                                       |      |      |      | 0.32                                   | 0.18 | 0.04 |     |                                          |      |      |      | 0.39                                | 0.47 | 0.86 |     |                                       |      |      |     |   |   |    |     |
| 1.02                                   | 0.10 | 0.26 |     |                                          |      |      |     | 0.74                                | 0.50 | 0.59 |     |                                       |      |      |      | 0.78                                   | 0.46 | 0.11 |     |                                          |      |      |      | 0.14                                | 0.55 | 0.62 |     |                                       |      |      |     |   |   |    |     |
| 1.41                                   | 0.21 | 0.03 |     |                                          |      |      |     | 0.69                                | 0.36 | 0.30 |     |                                       |      |      |      | 0.33                                   | 0.17 | 0.67 |     |                                          |      |      |      | 0.29                                | 0.25 | 0.44 |     |                                       |      |      |     |   |   |    |     |
| 1.13                                   | 0.07 | 0.26 |     |                                          |      |      |     | 0.77                                | 0.85 | 0.32 |     |                                       |      |      |      | 0.61                                   | 0.73 | 0.12 |     |                                          |      |      |      | 0.21                                | 0.38 | 0.59 |     |                                       |      |      |     |   |   |    |     |
| 0.98                                   | 0.07 | 0.27 |     |                                          |      |      |     | 0.19                                | 0.30 | 0.34 |     |                                       |      |      |      | 0.80                                   | 0.66 | 0.15 |     |                                          |      |      |      | 0.06                                | 0.33 | 0.55 |     |                                       |      |      |     |   |   |    |     |
| 0.88                                   | 0.24 | 0.16 |     |                                          |      |      |     | 0.34                                | 0.00 | 0.56 |     |                                       |      |      |      | 0.75                                   | 0.27 | 0.12 |     |                                          |      |      |      | 0.19                                | 0.19 | 0.52 |     |                                       |      |      |     |   |   |    |     |
| 0.94                                   | 0.15 | 0.27 |     |                                          |      |      |     | 0.35                                | 0.92 | 0.00 |     |                                       |      |      |      | 0.47                                   | 0.22 | 0.11 |     |                                          |      |      |      | 0.46                                | 0.38 | 0.15 |     |                                       |      |      |     |   |   |    |     |
| 0.93                                   | 0.19 | 0.26 |     |                                          |      |      |     | 0.77                                | 0.51 | 0.19 |     |                                       |      |      |      | 0.69                                   | 0.29 | 0.23 |     |                                          |      |      |      | 0.79                                | 0.41 | 0.08 |     |                                       |      |      |     |   |   |    |     |
| 1.17                                   | 0.03 | 0.15 |     |                                          |      |      |     |                                     |      |      |     |                                       |      |      | 0.51 | 0.54                                   | 0.29 |      |     |                                          |      |      | 0.43 | 0.82                                | 0.18 |      |     |                                       |      |      |     |   |   |    |     |
| 0.86                                   | 0.31 | 0.31 |     |                                          |      |      |     |                                     |      |      |     |                                       |      |      | 0.23 | 0.15                                   | 0.04 |      |     |                                          |      |      | 0.57 | 0.54                                | 0.49 |      |     |                                       |      |      |     |   |   |    |     |





**Table S19. Raw data for cortical spine subtype densities.**

**Spine columns are defined as follows:**

'Total' = Total density; 'Shaft' = Shaft synapse density

| Male <i>Adnp</i> <sup>+/+</sup> Saline |       | Female <i>Adnp</i> <sup>+/+</sup> Saline |       | Male <i>Adnp</i> <sup>+/+</sup> NAP |       | Female <i>Adnp</i> <sup>+/+</sup> NAP |       | Male <i>Adnp</i> <sup>+/-</sup> Saline |       | Female <i>Adnp</i> <sup>+/-</sup> Saline |       | Male <i>Adnp</i> <sup>+/-</sup> NAP |       | Female <i>Adnp</i> <sup>+/-</sup> NAP |       |
|----------------------------------------|-------|------------------------------------------|-------|-------------------------------------|-------|---------------------------------------|-------|----------------------------------------|-------|------------------------------------------|-------|-------------------------------------|-------|---------------------------------------|-------|
| Total                                  | Shaft | Total                                    | Shaft | Total                               | Shaft | Total                                 | Shaft | Total                                  | Shaft | Total                                    | Shaft | Total                               | Shaft | Total                                 | Shaft |
| 1.68                                   | 0.58  | 2.21                                     | 1.28  | 1.76                                | 0.94  | 1.84                                  | 0.74  | 1.25                                   | 0.91  | 0.98                                     | 1.37  | 1.86                                | 1.47  | 1.66                                  | 0.86  |
| 1.35                                   | 0.75  | 2.23                                     | 1.28  | 2.11                                | 1.24  | 1.85                                  | 0.94  | 1.08                                   | 1.18  | 1.85                                     | 1.40  | 1.37                                | 1.47  | 1.38                                  | 1.08  |
| 1.36                                   | 0.66  | 1.43                                     | 1.04  | 2.12                                | 1.26  | 1.76                                  | 1.09  | 0.26                                   | 1.13  | 1.56                                     | 1.25  | 1.42                                | 1.37  | 1.35                                  | 1.07  |
| 1.34                                   | 1.03  | 1.39                                     | 1.34  | 1.44                                | 1.12  | 2.75                                  | 1.06  | 1.28                                   | 1.30  | 0.63                                     | 1.36  | 1.52                                | 1.40  | 0.87                                  | 0.77  |
| 1.38                                   | 0.91  | 1.63                                     | 1.47  | 1.22                                | 0.95  | 2.92                                  | 1.64  | 1.28                                   | 1.16  | 0.28                                     | 1.31  | 1.29                                | 0.98  | 1.98                                  | 1.43  |
| 1.84                                   | 0.70  | 2.06                                     | 1.11  | 1.96                                | 1.16  | 1.24                                  | 1.11  | 0.50                                   | 1.28  | 0.44                                     | 1.54  | 1.56                                | 1.07  | 2.05                                  | 1.10  |
| 2.37                                   | 1.42  | 1.12                                     | 1.11  | 1.82                                | 1.09  | 1.88                                  | 1.20  | 0.86                                   | 1.56  | 1.39                                     | 0.99  | 1.54                                | 1.02  | 1.90                                  | 1.14  |
| 1.36                                   | 1.22  | 1.45                                     | 1.54  | 2.00                                | 0.95  | 1.56                                  | 1.10  | 0.92                                   | 1.36  | 0.95                                     | 1.16  | 2.23                                | 1.15  | 1.68                                  | 1.21  |
| 1.39                                   | 1.14  | 2.67                                     | 1.54  | 1.83                                | 1.15  | 2.19                                  | 1.04  | 1.22                                   | 0.95  | 1.22                                     | 1.17  | 1.63                                | 1.22  | 1.10                                  | 2.06  |
| 2.52                                   | 0.90  | 1.34                                     | 1.85  | 1.66                                | 1.19  | 1.97                                  | 1.00  | 1.07                                   | 1.69  | 0.89                                     | 1.16  | 2.10                                | 0.98  | 2.01                                  | 0.78  |
| 2.62                                   | 1.09  | 1.47                                     | 0.86  | 1.69                                | 1.23  | 1.67                                  | 0.96  | 0.91                                   | 1.71  | 1.37                                     | 0.84  | 1.83                                | 0.91  | 1.94                                  | 1.01  |
| 1.73                                   | 1.43  | 1.55                                     | 0.94  | 1.63                                | 1.32  | 1.74                                  | 0.95  | 1.09                                   | 1.55  | 0.72                                     | 1.23  | 2.78                                | 1.06  | 1.91                                  | 1.07  |
| 2.42                                   | 1.47  | 1.50                                     | 1.53  | 1.89                                | 1.08  | 2.03                                  | 1.27  | 1.59                                   | 1.64  | 1.32                                     | 1.24  | 1.98                                | 1.30  | 1.78                                  | 1.26  |
| 1.63                                   | 1.20  | 1.66                                     | 0.97  | 1.40                                | 1.16  | 1.95                                  | 1.30  | 0.89                                   | 1.22  | 1.16                                     | 1.09  | 1.98                                | 1.32  | 1.41                                  | 1.01  |
| 1.51                                   |       | 1.52                                     | 1.17  | 1.39                                |       | 1.65                                  | 1.32  | 0.43                                   |       | 0.98                                     | 1.06  | 2.12                                | 0.78  | 1.17                                  | 1.17  |
| 1.50                                   |       | 2.01                                     | 1.39  | 0.91                                |       | 1.94                                  | 0.94  | 0.94                                   |       | 0.96                                     | 1.96  | 2.76                                | 0.88  | 1.28                                  | 1.10  |
| 1.98                                   |       | 1.04                                     | 1.71  | 0.73                                |       | 1.78                                  | 1.41  | 0.95                                   |       | 0.50                                     | 1.86  | 1.77                                | 0.90  | 1.28                                  | 1.05  |
| 1.49                                   |       | 1.13                                     | 1.33  | 0.67                                |       | 1.94                                  | 1.25  | 1.05                                   |       | 1.49                                     | 1.29  | 1.96                                |       | 0.86                                  | 1.00  |
| 1.82                                   |       | 1.35                                     |       | 2.29                                |       | 2.24                                  |       | 0.48                                   |       | 0.44                                     |       | 2.14                                |       | 0.99                                  |       |
| 1.80                                   |       | 0.99                                     |       | 1.49                                |       | 2.28                                  |       | 0.97                                   |       | 1.73                                     |       | 1.20                                |       | 1.12                                  |       |
| 1.92                                   |       | 1.95                                     |       | 1.55                                |       | 2.06                                  |       | 1.12                                   |       | 1.64                                     |       | 0.88                                |       | 0.99                                  |       |
| 2.36                                   |       | 1.93                                     |       | 1.41                                |       | 2.05                                  |       | 0.71                                   |       | 0.55                                     |       | 1.59                                |       | 0.88                                  |       |
| 1.90                                   |       | 1.68                                     |       | 0.61                                |       | 2.00                                  |       | 1.38                                   |       | 1.65                                     |       | 1.50                                |       | 0.69                                  |       |
| 1.52                                   |       | 1.14                                     |       | 0.66                                |       | 2.26                                  |       | 0.80                                   |       | 0.16                                     |       | 1.60                                |       | 1.85                                  |       |
| 1.66                                   |       | 1.06                                     |       | 1.56                                |       | 1.80                                  |       | 0.65                                   |       | 0.44                                     |       | 1.61                                |       | 1.53                                  |       |
| 1.83                                   |       | 1.42                                     |       | 1.63                                |       | 1.55                                  |       | 0.88                                   |       | 0.45                                     |       | 1.96                                |       | 1.22                                  |       |

| Male <i>Adnp<sup>+/+</sup></i> Saline |       | Female <i>Adnp<sup>+/+</sup></i> Saline |       | Male <i>Adnp<sup>+/+</sup></i> NAP |       | Female <i>Adnp<sup>+/+</sup></i> NAP |       | Male <i>Adnp<sup>+/-</sup></i> Saline |       | Female <i>Adnp<sup>+/-</sup></i> Saline |       | Male <i>Adnp<sup>+/-</sup></i> NAP |       | Female <i>Adnp<sup>+/-</sup></i> NAP |       |
|---------------------------------------|-------|-----------------------------------------|-------|------------------------------------|-------|--------------------------------------|-------|---------------------------------------|-------|-----------------------------------------|-------|------------------------------------|-------|--------------------------------------|-------|
| Total                                 | Shaft | Total                                   | Shaft | Total                              | Shaft | Total                                | Shaft | Total                                 | Shaft | Total                                   | Shaft | Total                              | Shaft | Total                                | Shaft |
| 1.53                                  |       | 1.94                                    |       | 1.72                               |       | 1.07                                 |       | 0.97                                  |       | 0.33                                    |       | 2.06                               |       | 1.25                                 |       |
| 1.36                                  |       | 1.52                                    |       | 1.92                               |       | 1.35                                 |       | 1.21                                  |       | 1.33                                    |       | 1.65                               |       | 1.19                                 |       |
| 1.75                                  |       | 1.38                                    |       | 1.63                               |       | 1.16                                 |       | 1.52                                  |       | 1.62                                    |       | 1.58                               |       | 1.82                                 |       |
| 2.04                                  |       | 1.87                                    |       | 1.67                               |       | 1.16                                 |       | 1.08                                  |       | 1.29                                    |       | 1.47                               |       | 1.65                                 |       |
| 2.14                                  |       | 1.38                                    |       | 1.00                               |       | 1.50                                 |       | 1.08                                  |       | 1.55                                    |       | 1.61                               |       | 1.81                                 |       |
| 2.08                                  |       | 1.10                                    |       | 1.19                               |       | 1.42                                 |       | 1.36                                  |       | 0.54                                    |       | 1.52                               |       | 2.03                                 |       |
| 1.48                                  |       | 1.75                                    |       | 2.21                               |       | 1.13                                 |       | 0.18                                  |       | 0.84                                    |       | 2.22                               |       | 1.95                                 |       |
| 1.93                                  |       | 2.03                                    |       | 1.96                               |       | 1.46                                 |       | 0.91                                  |       | 1.13                                    |       | 1.86                               |       | 1.41                                 |       |
| 1.97                                  |       | 2.07                                    |       | 1.80                               |       | 1.49                                 |       | 0.63                                  |       | 0.84                                    |       | 2.32                               |       | 0.94                                 |       |
| 1.97                                  |       | 1.74                                    |       | 1.80                               |       | 1.75                                 |       | 1.52                                  |       | 1.23                                    |       | 2.40                               |       | 1.60                                 |       |
| 1.78                                  |       | 1.92                                    |       | 1.95                               |       | 2.21                                 |       | 1.30                                  |       | 1.20                                    |       | 2.07                               |       | 1.40                                 |       |
| 1.70                                  |       | 1.48                                    |       | 2.32                               |       | 1.73                                 |       | 1.29                                  |       | 1.00                                    |       | 1.99                               |       | 1.82                                 |       |
| 2.33                                  |       | 1.47                                    |       | 1.00                               |       | 1.44                                 |       | 1.42                                  |       | 0.58                                    |       | 1.76                               |       | 1.71                                 |       |
| 2.74                                  |       | 1.53                                    |       | 1.37                               |       | 1.46                                 |       | 0.78                                  |       | 1.03                                    |       | 1.99                               |       | 1.74                                 |       |
| 2.63                                  |       | 1.78                                    |       | 1.22                               |       | 1.26                                 |       | 1.10                                  |       | 1.19                                    |       | 1.96                               |       | 1.46                                 |       |
| 2.09                                  |       | 1.21                                    |       | 1.58                               |       | 0.99                                 |       | 0.53                                  |       | 0.58                                    |       | 1.99                               |       | 1.87                                 |       |
| 1.29                                  |       | 1.35                                    |       | 1.55                               |       | 1.86                                 |       | 1.14                                  |       | 1.05                                    |       | 1.81                               |       | 1.44                                 |       |
| 1.25                                  |       | 1.35                                    |       | 1.70                               |       | 1.40                                 |       |                                       |       | 1.06                                    |       | 2.14                               |       | 1.13                                 |       |
| 1.57                                  |       | 1.79                                    |       | 1.96                               |       | 1.54                                 |       |                                       |       | 1.52                                    |       | 1.92                               |       | 0.92                                 |       |
| 1.89                                  |       | 1.29                                    |       | 2.48                               |       | 1.64                                 |       |                                       |       | 1.25                                    |       |                                    |       | 0.91                                 |       |
| 1.79                                  |       | 1.70                                    |       | 2.04                               |       | 1.22                                 |       |                                       |       | 1.58                                    |       |                                    |       | 1.24                                 |       |
|                                       |       |                                         |       |                                    |       | 1.78                                 |       |                                       |       |                                         |       |                                    |       | 1.04                                 |       |
|                                       |       |                                         |       |                                    |       | 1.55                                 |       |                                       |       |                                         |       |                                    |       | 1.26                                 |       |

**Table S20. Raw data for cortical spine subtype densities.**

**Spine columns are defined as follows:**

'M' = Mushroom density; 'S' = Stubby density; 'Th' = Thin density; 'Vol' = PSD95 volume

| Male Adnp <sup>+/+</sup> Saline |      |      |      | Female Adnp <sup>+/+</sup> Saline |      |      |      | Male Adnp <sup>+/+</sup> NAP |      |      |      | Female Adnp <sup>+/+</sup> NAP |      |      |      | Male Adnp <sup>+/+</sup> Saline |      |      |      | Female Adnp <sup>+/+</sup> Saline |      |      |      | Male Adnp <sup>+/+</sup> NAP |      |      |      | Female Adnp <sup>+/+</sup> NAP |      |      |      |   |   |    |     |   |   |    |     |
|---------------------------------|------|------|------|-----------------------------------|------|------|------|------------------------------|------|------|------|--------------------------------|------|------|------|---------------------------------|------|------|------|-----------------------------------|------|------|------|------------------------------|------|------|------|--------------------------------|------|------|------|---|---|----|-----|---|---|----|-----|
| M                               | S    | Th   | Vol  | M                                 | S    | Th   | Vol  | M                            | S    | Th   | Vol  | M                              | S    | Th   | Vol  | M                               | S    | Th   | Vol  | M                                 | S    | Th   | Vol  | M                            | S    | Th   | Vol  | M                              | S    | Th   | Vol  | M | S | Th | Vol | M | S | Th | Vol |
| 0.86                            | 0.43 | 0.39 | 0.46 | 1.33                              | 0.44 | 0.44 | 0.22 | 1.03                         | 0.48 | 0.24 | 0.21 | 1.07                           | 0.61 | 0.15 | 0.27 | 0.51                            | 0.62 | 0.11 | 0.41 | 0.45                              | 0.34 | 0.19 | 0.27 | 1.24                         | 0.34 | 0.28 | 0.29 | 0.83                           | 0.44 | 0.39 | 0.46 |   |   |    |     |   |   |    |     |
| 0.67                            | 0.31 | 0.36 | 0.33 | 0.98                              | 0.62 | 0.62 | 0.28 | 0.42                         | 1.12 | 0.56 | 0.27 | 0.80                           | 0.46 | 0.59 | 0.33 | 0.37                            | 0.48 | 0.22 | 0.41 | 0.41                              | 0.70 | 0.74 | 0.24 | 0.51                         | 0.47 | 0.39 | 0.28 | 0.75                           | 0.38 | 0.25 | 0.45 |   |   |    |     |   |   |    |     |
| 0.59                            | 0.24 | 0.52 | 0.38 | 0.58                              | 0.54 | 0.31 | 0.22 | 0.57                         | 1.10 | 0.45 | 0.24 | 0.72                           | 0.50 | 0.55 | 0.31 | 0.04                            | 0.07 | 0.15 | 0.36 | 0.73                              | 0.51 | 0.32 | 0.29 | 0.99                         | 0.23 | 0.20 | 0.24 | 0.68                           | 0.24 | 0.44 | 0.41 |   |   |    |     |   |   |    |     |
| 0.45                            | 0.48 | 0.41 | 0.22 | 0.91                              | 0.26 | 0.22 | 0.18 | 0.69                         | 0.39 | 0.36 | 0.30 | 1.37                           | 0.75 | 0.62 | 0.19 | 0.34                            | 0.88 | 0.06 | 0.33 | 0.12                              | 0.47 | 0.04 | 0.33 | 1.00                         | 0.30 | 0.22 | 0.34 | 0.48                           | 0.22 | 0.17 | 0.57 |   |   |    |     |   |   |    |     |
| 0.56                            | 0.56 | 0.26 | 0.27 | 0.83                              | 0.27 | 0.53 | 0.23 | 0.49                         | 0.52 | 0.21 | 0.32 | 1.51                           | 0.73 | 0.68 | 0.21 | 0.44                            | 0.73 | 0.11 | 0.30 | 0.06                              | 0.22 | 0.00 | 0.22 | 0.85                         | 0.26 | 0.18 | 0.28 | 0.93                           | 0.27 | 0.77 | 0.38 |   |   |    |     |   |   |    |     |
| 0.83                            | 0.21 | 0.79 | 0.44 | 1.32                              | 0.39 | 0.34 | 0.17 | 0.69                         | 0.72 | 0.55 | 0.27 | 0.55                           | 0.34 | 0.34 | 0.23 | 0.50                            | 0.38 | 0.12 | 0.35 | 0.00                              | 0.40 | 0.04 | 0.28 | 0.63                         | 0.15 | 0.78 | 0.37 | 0.81                           | 0.53 | 0.72 | 0.30 |   |   |    |     |   |   |    |     |
| 0.41                            | 1.70 | 0.26 | 0.21 | 0.64                              | 0.16 | 0.32 | 0.14 | 0.67                         | 0.41 | 0.74 | 0.27 | 1.05                           | 0.59 | 0.23 | 0.17 | 0.32                            | 0.26 | 0.29 | 0.28 | 0.64                              | 0.32 | 0.44 | 0.38 | 0.98                         | 0.30 | 0.26 | 0.36 | 1.43                           | 0.32 | 0.14 | 0.30 |   |   |    |     |   |   |    |     |
| 0.93                            | 0.15 | 0.28 | 0.22 | 0.91                              | 0.27 | 0.27 | 0.14 | 1.03                         | 0.48 | 0.48 | 0.31 | 0.86                           | 0.65 | 0.04 | 0.34 | 0.33                            | 0.29 | 0.29 | 0.28 | 0.54                              | 0.35 | 0.06 | 0.28 | 1.06                         | 0.55 | 0.62 | 0.36 | 0.61                           | 0.38 | 0.69 | 0.32 |   |   |    |     |   |   |    |     |
| 0.82                            | 0.38 | 0.19 | 0.28 | 1.51                              | 0.39 | 0.78 | 0.19 | 0.72                         | 0.18 | 0.93 | 0.24 | 1.19                           | 0.62 | 0.38 | 0.35 | 0.85                            | 0.10 | 0.27 | 0.36 | 0.56                              | 0.52 | 0.14 | 0.33 | 0.95                         | 0.44 | 0.24 | 0.27 | 0.52                           | 0.26 | 0.31 | 0.21 |   |   |    |     |   |   |    |     |
| 1.63                            | 0.26 | 0.63 | 0.39 | 0.65                              | 0.53 | 0.16 | 0.26 | 0.83                         | 0.23 | 0.60 | 0.26 | 0.99                           | 0.86 | 0.12 | 0.36 | 0.42                            | 0.32 | 0.32 | 0.28 | 0.16                              | 0.12 | 0.61 | 0.33 | 0.79                         | 0.53 | 0.79 | 0.36 | 0.96                           | 0.60 | 0.44 | 0.37 |   |   |    |     |   |   |    |     |
| 1.60                            | 0.38 | 0.64 | 0.36 | 0.96                              | 0.42 | 0.08 | 0.27 | 0.75                         | 0.60 | 0.34 | 0.25 | 0.72                           | 0.72 | 0.23 | 0.34 | 0.40                            | 0.40 | 0.12 | 0.30 | 0.69                              | 0.27 | 0.42 | 0.30 | 1.33                         | 0.19 | 0.32 | 0.43 | 1.08                           | 0.48 | 0.38 | 0.38 |   |   |    |     |   |   |    |     |
| 1.09                            | 0.34 | 0.30 | 0.22 | 0.74                              | 0.34 | 0.47 | 0.36 | 1.12                         | 0.22 | 0.29 | 0.27 | 1.34                           | 0.32 | 0.08 | 0.37 | 0.45                            | 0.18 | 0.45 | 0.36 | 0.15                              | 0.31 | 0.27 | 0.31 | 1.78                         | 0.64 | 0.36 | 0.36 | 0.86                           | 0.53 | 0.53 | 0.39 |   |   |    |     |   |   |    |     |
| 1.23                            | 0.32 | 0.87 | 0.26 | 0.68                              | 0.36 | 0.46 | 0.21 | 1.09                         | 0.64 | 0.15 | 0.32 | 1.07                           | 0.50 | 0.46 | 0.21 | 0.74                            | 0.74 | 0.11 | 0.33 | 0.54                              | 0.24 | 0.54 | 0.33 | 1.34                         | 0.38 | 0.27 | 0.40 | 0.73                           | 0.50 | 0.55 | 0.26 |   |   |    |     |   |   |    |     |
| 0.96                            | 0.25 | 0.41 | 0.25 | 0.78                              | 0.61 | 0.26 | 0.22 | 1.00                         | 0.28 | 0.12 | 0.28 | 1.13                           | 0.74 | 0.09 | 0.27 | 0.32                            | 0.29 | 0.29 | 0.33 | 0.63                              | 0.38 | 0.16 | 0.30 | 1.43                         | 0.24 | 0.31 | 0.38 | 0.75                           | 0.35 | 0.31 | 0.35 |   |   |    |     |   |   |    |     |
| 0.76                            | 0.24 | 0.52 |      | 0.87                              | 0.36 | 0.29 | 0.21 | 0.93                         | 0.46 | 0.00 |      | 0.98                           | 0.46 | 0.21 | 0.30 | 0.12                            | 0.28 | 0.03 |      | 0.49                              | 0.39 | 0.11 | 0.38 | 1.35                         | 0.55 | 0.21 | 0.55 | 0.69                           | 0.36 | 0.12 | 0.32 |   |   |    |     |   |   |    |     |
| 1.03                            | 0.41 | 0.07 |      | 1.09                              | 0.61 | 0.31 | 0.15 | 0.60                         | 0.28 | 0.04 |      | 1.16                           | 0.50 | 0.27 | 0.33 | 0.34                            | 0.37 | 0.24 |      | 0.48                              | 0.32 | 0.16 | 0.25 | 1.56                         | 0.91 | 0.29 | 0.48 | 0.68                           | 0.36 | 0.24 | 0.37 |   |   |    |     |   |   |    |     |
| 0.90                            | 0.76 | 0.32 |      | 0.48                              | 0.24 | 0.32 | 0.13 | 0.35                         | 0.07 | 0.31 |      | 1.05                           | 0.48 | 0.24 | 0.24 | 0.49                            | 0.26 | 0.20 |      | 0.31                              | 0.12 | 0.08 | 0.29 | 0.94                         | 0.31 | 0.52 | 0.47 | 0.68                           | 0.27 | 0.32 | 0.44 |   |   |    |     |   |   |    |     |
| 0.71                            | 0.57 | 0.21 |      | 0.63                              | 0.38 | 0.13 | 0.16 | 0.57                         | 0.07 | 0.03 |      | 1.27                           | 0.40 | 0.28 | 0.26 | 0.28                            | 0.66 | 0.10 |      | 0.69                              | 0.48 | 0.33 | 0.35 | 0.88                         | 0.52 | 0.56 |      | 0.21                           | 0.25 | 0.39 | 0.39 |   |   |    |     |   |   |    |     |
| 1.26                            | 0.41 | 0.15 |      | 0.73                              | 0.46 | 0.15 |      | 1.42                         | 0.42 | 0.45 |      | 1.19                           | 0.63 | 0.41 |      | 0.29                            | 0.16 | 0.03 |      | 0.16                              | 0.16 | 0.13 |      | 0.80                         | 0.29 | 1.05 |      | 0.72                           | 0.15 | 0.11 |      |   |   |    |     |   |   |    |     |
| 0.96                            | 0.58 | 0.27 |      | 0.68                              | 0.09 | 0.23 |      | 0.91                         | 0.36 | 0.22 |      | 1.42                           | 0.53 | 0.32 |      | 0.43                            | 0.29 | 0.25 |      | 0.87                              | 0.48 | 0.38 |      | 0.51                         | 0.33 | 0.36 |      | 0.41                           | 0.47 | 0.24 |      |   |   |    |     |   |   |    |     |
| 0.98                            | 0.75 | 0.19 |      | 0.83                              | 0.61 | 0.51 |      | 0.95                         | 0.42 | 0.18 |      | 1.01                           | 0.84 | 0.21 |      | 0.61                            | 0.29 | 0.22 |      | 0.62                              | 0.53 | 0.50 |      | 0.39                         | 0.10 | 0.39 |      | 0.62                           | 0.25 | 0.12 |      |   |   |    |     |   |   |    |     |
| 1.28                            | 0.31 | 0.77 |      | 1.09                              | 0.58 | 0.26 |      | 0.95                         | 0.17 | 0.29 |      | 1.01                           | 0.50 | 0.54 |      | 0.41                            | 0.14 | 0.17 |      | 0.19                              | 0.32 | 0.03 |      | 1.04                         | 0.52 | 0.03 |      | 0.48                           | 0.22 | 0.18 |      |   |   |    |     |   |   |    |     |
| 0.97                            | 0.48 | 0.45 |      | 0.70                              | 0.49 | 0.49 |      | 0.37                         | 0.20 | 0.03 |      | 1.16                           | 0.41 | 0.43 |      | 0.55                            | 0.38 | 0.45 |      | 0.81                              | 0.24 | 0.60 |      | 1.01                         | 0.03 | 0.46 |      | 0.41                           | 0.14 | 0.14 |      |   |   |    |     |   |   |    |     |
| 0.95                            | 0.49 | 0.08 |      | 0.45                              | 0.24 | 0.45 |      | 0.46                         | 0.03 | 0.17 |      | 1.13                           | 0.65 | 0.48 |      | 0.35                            | 0.39 | 0.06 |      | 0.06                              | 0.06 | 0.03 |      | 1.00                         | 0.19 | 0.41 |      | 0.87                           | 0.40 | 0.58 |      |   |   |    |     |   |   |    |     |
| 0.90                            | 0.54 | 0.23 |      | 0.49                              | 0.38 | 0.19 |      | 0.98                         | 0.37 | 0.21 |      | 1.35                           | 0.34 | 0.11 |      | 0.15                            | 0.37 | 0.12 |      | 0.18                              | 0.18 | 0.09 |      | 1.20                         | 0.37 | 0.04 |      | 0.81                           | 0.27 | 0.45 |      |   |   |    |     |   |   |    |     |
| 1.21                            | 0.40 | 0.22 |      | 0.58                              | 0.26 | 0.58 |      | 0.90                         | 0.47 | 0.25 |      | 0.84                           | 0.55 | 0.16 |      | 0.21                            | 0.25 | 0.42 |      | 0.11                              | 0.30 | 0.04 |      | 1.02                         | 0.55 | 0.38 |      | 0.30                           | 0.30 | 0.61 |      |   |   |    |     |   |   |    |     |
| 1.27                            | 0.07 | 0.18 |      | 1.10                              | 0.39 | 0.45 |      | 1.33                         | 0.07 | 0.32 |      | 0.63                           | 0.26 | 0.18 |      | 0.42                            | 0.21 | 0.35 |      | 0.03                              | 0.30 | 0.00 |      | 1.29                         | 0.40 | 0.37 |      | 0.81                           | 0.22 | 0.22 |      |   |   |    |     |   |   |    |     |
| 0.83                            | 0.36 | 0.18 |      | 0.94                              | 0.40 | 0.18 |      | 1.22                         | 0.41 | 0.28 |      | 0.93                           | 0.08 | 0.35 |      | 0.62                            | 0.36 | 0.23 |      | 0.30                              | 0.60 | 0.43 |      | 0.77                         | 0.27 | 0.62 |      | 0.68                           | 0.18 | 0.32 |      |   |   |    |     |   |   |    |     |
| 0.94                            | 0.39 | 0.42 |      | 0.90                              | 0.26 | 0.22 |      | 0.85                         | 0.31 | 0.47 |      | 0.56                           | 0.22 | 0.37 |      | 0.69                            | 0.39 | 0.43 |      | 0.40                              | 0.65 | 0.57 |      | 0.77                         | 0.62 | 0.19 |      | 0.95                           | 0.37 | 0.50 |      |   |   |    |     |   |   |    |     |
| 1.22                            | 0.71 | 0.11 |      | 0.93                              | 0.34 | 0.60 |      | 1.02                         | 0.18 | 0.47 |      | 0.78                           | 0.34 | 0.04 |      | 0.90                            | 0.15 | 0.03 |      | 0.26                              | 0.63 | 0.40 |      | 0.85                         | 0.37 | 0.26 |      | 0.75                           | 0.45 | 0.45 |      |   |   |    |     |   |   |    |     |

| Male Adnp <sup>+/+</sup> Saline |      |      |     | Female Adnp <sup>+/+</sup> Saline |      |      |     | Male Adnp <sup>+/+</sup> NAP |      |      |     | Female Adnp <sup>+/+</sup> NAP |      |      |     | Male Adnp <sup>+/-</sup> Saline |      |      |     | Female Adnp <sup>+/-</sup> Saline |      |      |     | Male Adnp <sup>+/-</sup> NAP |      |      |     | Female Adnp <sup>+/-</sup> NAP |      |      |      |   |   |    |     |
|---------------------------------|------|------|-----|-----------------------------------|------|------|-----|------------------------------|------|------|-----|--------------------------------|------|------|-----|---------------------------------|------|------|-----|-----------------------------------|------|------|-----|------------------------------|------|------|-----|--------------------------------|------|------|------|---|---|----|-----|
| M                               | S    | Th   | Vol | M                                 | S    | Th   | Vol | M                            | S    | Th   | Vol | M                              | S    | Th   | Vol | M                               | S    | Th   | Vol | M                                 | S    | Th   | Vol | M                            | S    | Th   | Vol | M                              | S    | Th   | Vol  | M | S | Th | Vol |
| 0.94                            | 0.80 | 0.40 |     | 0.86                              | 0.22 | 0.30 |     | 0.58                         | 0.39 | 0.03 |     | 0.80                           | 0.28 | 0.42 |     | 0.68                            | 0.40 | 0.00 |     | 0.72                              | 0.41 | 0.41 |     | 0.60                         | 0.26 | 0.75 |     | 1.01                           | 0.35 | 0.44 |      |   |   |    |     |
| 1.19                            | 0.73 | 0.17 |     | 0.59                              | 0.34 | 0.17 |     | 0.79                         | 0.32 | 0.07 |     | 1.03                           | 0.24 | 0.15 |     | 1.07                            | 0.14 | 0.14 |     | 0.32                              | 0.18 | 0.04 |     | 0.72                         | 0.32 | 0.48 |     | 1.00                           | 0.78 | 0.26 |      |   |   |    |     |
| 0.85                            | 0.30 | 0.33 |     | 0.85                              | 0.41 | 0.50 |     | 0.93                         | 0.62 | 0.66 |     | 0.79                           | 0.19 | 0.15 |     | 0.07                            | 0.11 | 0.00 |     | 0.19                              | 0.23 | 0.42 |     | 1.33                         | 0.40 | 0.49 |     | 1.27                           | 0.44 | 0.24 |      |   |   |    |     |
| 1.13                            | 0.64 | 0.15 |     | 0.89                              | 0.33 | 0.81 |     | 1.45                         | 0.31 | 0.20 |     | 1.02                           | 0.34 | 0.10 |     | 0.30                            | 0.51 | 0.10 |     | 0.50                              | 0.22 | 0.41 |     | 0.98                         | 0.39 | 0.49 |     | 1.04                           | 0.19 | 0.19 |      |   |   |    |     |
| 1.40                            | 0.27 | 0.30 |     | 0.87                              | 0.68 | 0.52 |     | 1.12                         | 0.50 | 0.18 |     | 0.85                           | 0.60 | 0.04 |     | 0.37                            | 0.18 | 0.07 |     | 0.35                              | 0.40 | 0.09 |     | 1.12                         | 0.98 | 0.22 |     | 0.58                           | 0.13 | 0.22 |      |   |   |    |     |
| 1.06                            | 0.72 | 0.19 |     | 1.11                              | 0.35 | 0.29 |     | 1.20                         | 0.11 | 0.49 |     | 1.02                           | 0.60 | 0.14 |     | 0.90                            | 0.33 | 0.30 |     | 0.46                              | 0.40 | 0.37 |     | 1.71                         | 0.62 | 0.07 |     | 0.86                           | 0.62 | 0.12 |      |   |   |    |     |
| 0.89                            | 0.33 | 0.56 |     | 1.28                              | 0.44 | 0.20 |     | 1.01                         | 0.36 | 0.58 |     | 1.29                           | 0.75 | 0.17 |     | 0.88                            | 0.15 | 0.27 |     | 0.95                              | 0.19 | 0.06 |     | 1.48                         | 0.41 | 0.18 |     | 0.82                           | 0.19 | 0.39 |      |   |   |    |     |
| 1.11                            | 0.30 | 0.30 |     | 1.09                              | 0.27 | 0.12 |     | 1.59                         | 0.60 | 0.13 |     | 1.14                           | 0.37 | 0.22 |     | 0.78                            | 0.10 | 0.41 |     | 0.56                              | 0.20 | 0.24 |     | 1.31                         | 0.38 | 0.30 |     | 0.81                           | 0.57 | 0.45 |      |   |   |    |     |
| 1.23                            | 0.65 | 0.45 |     | 0.78                              | 0.45 | 0.24 |     | 0.54                         | 0.15 | 0.30 |     | 0.84                           | 0.35 | 0.25 |     | 0.75                            | 0.22 | 0.45 |     | 0.24                              | 0.31 | 0.03 |     | 0.89                         | 0.55 | 0.32 |     | 0.62                           | 0.39 | 0.70 |      |   |   |    |     |
| 1.94                            | 0.47 | 0.33 |     | 1.04                              | 0.40 | 0.09 |     | 0.60                         | 0.21 | 0.56 |     | 0.84                           | 0.44 | 0.18 |     | 0.42                            | 0.18 | 0.18 |     | 0.56                              | 0.19 | 0.28 |     | 1.23                         | 0.49 | 0.27 |     | 0.93                           | 0.40 | 0.40 |      |   |   |    |     |
| 1.46                            | 0.78 | 0.39 |     | 1.14                              | 0.36 | 0.29 |     | 0.61                         | 0.12 | 0.49 |     | 0.77                           | 0.42 | 0.07 |     | 0.72                            | 0.13 | 0.25 |     | 0.58                              | 0.51 | 0.10 |     | 1.17                         | 0.69 | 0.10 |     | 1.04                           | 0.33 | 0.08 |      |   |   |    |     |
| 1.33                            | 0.46 | 0.30 |     | 0.77                              | 0.26 | 0.18 |     | 0.98                         | 0.27 | 0.34 |     | 0.49                           | 0.25 | 0.25 |     | 0.23                            | 0.19 | 0.11 |     | 0.04                              | 0.38 | 0.15 |     | 1.28                         | 0.52 | 0.19 |     | 1.17                           | 0.22 | 0.48 |      |   |   |    |     |
| 0.82                            | 0.29 | 0.18 |     | 0.55                              | 0.46 | 0.34 |     | 0.84                         | 0.25 | 0.46 |     | 1.30                           | 0.37 | 0.19 |     | 0.52                            | 0.42 | 0.21 |     | 0.74                              | 0.24 | 0.07 |     | 1.16                         | 0.44 | 0.22 |     | 0.67                           | 0.26 | 0.51 |      |   |   |    |     |
| 0.42                            | 0.15 | 0.68 |     | 0.84                              | 0.14 | 0.37 |     | 0.74                         | 0.56 | 0.41 |     | 0.64                           | 0.39 | 0.36 |     |                                 |      |      |     | 0.73                              | 0.12 | 0.21 |     | 1.18                         | 0.56 | 0.40 |     | 0.68                           | 0.36 | 0.09 |      |   |   |    |     |
| 0.88                            | 0.38 | 0.31 |     | 1.05                              | 0.41 | 0.34 |     | 1.11                         | 0.51 | 0.34 |     | 0.88                           | 0.57 | 0.09 |     |                                 |      |      |     | 0.64                              | 0.23 | 0.64 |     | 0.83                         | 0.64 | 0.45 |     | 0.46                           | 0.28 | 0.18 |      |   |   |    |     |
| 0.83                            | 0.59 | 0.46 |     | 0.77                              | 0.25 | 0.28 |     | 1.43                         | 0.68 | 0.38 |     | 0.78                           | 0.30 | 0.56 |     |                                 |      |      |     | 0.68                              | 0.14 | 0.43 |     |                              |      |      |     | 0.59                           | 0.18 | 0.14 |      |   |   |    |     |
| 1.18                            | 0.42 | 0.19 |     | 0.95                              | 0.61 | 0.14 |     | 1.29                         | 0.42 | 0.34 |     | 0.71                           | 0.22 | 0.29 |     |                                 |      |      |     | 0.72                              | 0.18 | 0.68 |     |                              |      |      |     | 0.45                           | 0.49 | 0.30 |      |   |   |    |     |
|                                 |      |      |     |                                   |      |      |     |                              |      |      |     | 0.94                           | 0.68 | 0.16 |     |                                 |      |      |     |                                   |      |      |     |                              |      |      |     |                                | 0.54 | 0.36 | 0.14 |   |   |    |     |
|                                 |      |      |     |                                   |      |      |     |                              |      |      |     | 0.80                           | 0.56 | 0.19 |     |                                 |      |      |     |                                   |      |      |     |                              |      |      |     |                                | 0.78 | 0.34 | 0.15 |   |   |    |     |

**Table S21. Raw data for high-throughput quantitative real-time PCR gene expression results during developmental period in 19-27-day-old animals.**

| Mouse No. | Genotype                   | Treatment | Sex    | Gene expression |              |             |
|-----------|----------------------------|-----------|--------|-----------------|--------------|-------------|
|           |                            |           |        | <i>Fpr-rs3</i>  | <i>Tubb1</i> | <i>Adnp</i> |
| 7S1       | <i>Adnp</i> <sup>+/+</sup> | Saline/DD | Male   | 4.42            | 0.48         | 1.00        |
| 7S2       | <i>Adnp</i> <sup>+/+</sup> | Saline/DD | Male   | 4.87            | 2.44         | 1.31        |
| 8S1       | <i>Adnp</i> <sup>+/+</sup> | Saline/DD | Male   | 4.27            | 1.27         | 2.20        |
| 9S5       | <i>Adnp</i> <sup>+/+</sup> | Saline/DD | Male   | 4.34            | 1.19         | 2.98        |
| 11S3      | <i>Adnp</i> <sup>+/+</sup> | Saline/DD | Male   | 3.40            | 1.42         | 1.57        |
| 8S2       | <i>Adnp</i> <sup>+/+</sup> | Saline/DD | Female | 4.54            | 0.00         | 1.30        |
| 8S3       | <i>Adnp</i> <sup>+/+</sup> | Saline/DD | Female | 3.70            | 1.16         | 1.57        |
| 9S1       | <i>Adnp</i> <sup>+/+</sup> | Saline/DD | Female | 3.91            | 1.83         | 2.90        |
| 10S1      | <i>Adnp</i> <sup>+/+</sup> | Saline/DD | Female | 3.78            | 1.84         | 2.22        |
| 10S2      | <i>Adnp</i> <sup>+/+</sup> | Saline/DD | Female | 4.73            | 1.44         | 2.32        |
| 12S3      | <i>Adnp</i> <sup>+/+</sup> | Saline/DD | Female | 2.80            | 1.74         | 2.33        |
| 8S4       | <i>Adnp</i> <sup>+/-</sup> | Saline/DD | Male   | 3.14            | 1.43         | 1.49        |
| 9S2       | <i>Adnp</i> <sup>+/-</sup> | Saline/DD | Male   | 3.80            | 0.51         | 1.58        |
| 9S3       | <i>Adnp</i> <sup>+/-</sup> | Saline/DD | Male   | 3.69            | 2.90         | 1.56        |
| 9S4       | <i>Adnp</i> <sup>+/-</sup> | Saline/DD | Male   | 3.06            | 2.02         | 1.19        |
| 10S4      | <i>Adnp</i> <sup>+/-</sup> | Saline/DD | Male   | 2.41            | 0.83         | 1.25        |
| 8S5       | <i>Adnp</i> <sup>+/-</sup> | Saline/DD | Female | 4.89            | 3.63         | 0.39        |
| 10S3      | <i>Adnp</i> <sup>+/-</sup> | Saline/DD | Female | 4.57            | 2.55         | 1.00        |
| 10S5      | <i>Adnp</i> <sup>+/-</sup> | Saline/DD | Female | 3.87            |              | 0.00        |
| 12S4      | <i>Adnp</i> <sup>+/-</sup> | Saline/DD | Female | 2.17            | 2.33         | 0.92        |
| 7N2       | <i>Adnp</i> <sup>+/-</sup> | NAP       | Male   | 4.63            | 1.94         | 0.71        |
| 8N4       | <i>Adnp</i> <sup>+/-</sup> | NAP       | Male   | 3.74            | 0.69         | 1.26        |
| 8N5       | <i>Adnp</i> <sup>+/-</sup> | NAP       | Male   | 4.09            | 1.37         | 1.37        |
| 9N2       | <i>Adnp</i> <sup>+/-</sup> | NAP       | Male   | 4.20            | 2.40         | 1.10        |
| 10N4      | <i>Adnp</i> <sup>+/-</sup> | NAP       | Male   | 4.18            | 1.43         | 0.03        |
| 8N2       | <i>Adnp</i> <sup>+/-</sup> | NAP       | Female | 3.16            | 0.27         | 1.15        |
| 9N1       | <i>Adnp</i> <sup>+/-</sup> | NAP       | Female | 0.00            | 0.69         | 1.84        |
| 10N2      | <i>Adnp</i> <sup>+/-</sup> | NAP       | Female | 4.07            | 1.73         | 1.22        |
| 10N3      | <i>Adnp</i> <sup>+/-</sup> | NAP       | Female | 3.63            |              | 2.48        |
| 10N5      | <i>Adnp</i> <sup>+/-</sup> | NAP       | Female | 4.24            |              | 0.85        |

**Table S22. Raw data for high-throughput quantitative real-time PCR gene expression results in 3-month-old animals.**

| Mouse No. | Genotype                   | Treatment | Sex    | Gene expression |             |                |             |              |             |             |              |              |             |              |             |              |             |             |             |
|-----------|----------------------------|-----------|--------|-----------------|-------------|----------------|-------------|--------------|-------------|-------------|--------------|--------------|-------------|--------------|-------------|--------------|-------------|-------------|-------------|
|           |                            |           |        | <i>Hsd17b2</i>  | <i>Apoe</i> | <i>Gm21949</i> | <i>Lipa</i> | <i>Nlgn2</i> | <i>Pax6</i> | <i>Wfs1</i> | <i>Abcf3</i> | <i>Akt 1</i> | <i>Bmp4</i> | <i>Cdh17</i> | <i>Iba1</i> | <i>Kdm5d</i> | <i>Klf1</i> | <i>Mtor</i> | <i>Per1</i> |
| 2717      | <i>Adnp</i> <sup>+/+</sup> | Saline/DD | Male   | 0.81            | 2.84        | 3.66           | 3.39        | 4.18         | 5.39        | 3.53        | 0.76         | 0.81         | 2.09        | 1.19         | 0.30        | 1.48         | 1.40        | 0.99        | 2.55        |
| 2720      | <i>Adnp</i> <sup>+/+</sup> | Saline/DD | Male   | 1.23            | 3.49        | 3.77           | 4.42        | 5.11         | 5.97        | 3.93        | 0.95         | 1.87         | 1.97        | 2.37         | 0.05        | 0.00         | 2.10        | 1.08        | 2.39        |
| 2719      | <i>Adnp</i> <sup>+/+</sup> | Saline/DD | Male   | 0.67            | 2.61        | 2.73           | 3.28        | 3.97         | 5.09        | 3.12        | 1.46         | 2.51         | 0.00        | 2.40         | 1.03        | 2.03         | 1.95        | 1.87        | 3.09        |
| 2715      | <i>Adnp</i> <sup>+/+</sup> | Saline/DD | Female | 1.34            | 3.20        | 4.12           | 3.85        | 4.39         | 5.76        | 3.46        | 1.97         | 1.89         | 2.68        | 0.00         | 0.68        |              | 2.61        | 1.55        | 3.59        |
| 2718      | <i>Adnp</i> <sup>+/+</sup> | Saline/DD | Female | 1.44            | 2.70        | 3.51           | 3.62        | 3.89         | 4.98        | 3.41        | 1.34         | 1.83         | 3.06        | 2.97         | 1.03        |              | 2.11        | 1.38        | 4.33        |
| 2711      | <i>Adnp</i> <sup>+/+</sup> | Saline/DD | Female | 1.44            | 3.40        | 4.31           | 3.70        | 4.84         | 5.75        | 4.02        | 1.32         | 1.82         | 3.46        | 2.23         | 0.28        |              | 3.17        | 1.11        | 3.73        |
| 2735      | <i>Adnp</i> <sup>+/+</sup> | Saline/DD | Female | 0.61            | 0.00        | 0.00           | 0.00        | 0.00         | 0.00        | 0.00        | 0.63         | 0.47         | 1.78        | 2.11         | 0.45        |              | 2.62        | 0.49        | 2.59        |
| 2733      | <i>Adnp</i> <sup>+/+</sup> | Saline/DD | Female | 1.14            | 3.05        | 3.55           | 4.18        | 4.74         | 5.98        | 4.53        | 1.59         | 1.23         | 2.27        | 3.03         | 0.69        |              | 2.03        | 1.23        | 3.12        |
| 2731      | <i>Adnp</i> <sup>+/+</sup> | Saline/DD | Female | 0.87            | 4.31        | 5.14           | 4.71        | 5.76         | 6.43        | 4.83        | 1.02         | 1.10         | 1.39        | 2.83         | 0.25        |              | 1.57        | 0.00        | 2.53        |
| 2713      | <i>Adnp</i> <sup>+/-</sup> | Saline/DD | Male   | 0.40            | 4.00        | 5.03           | 5.03        | 5.84         | 6.87        | 4.62        | 2.06         | 2.10         | 2.99        | 3.96         | 0.98        | 3.07         | 2.57        | 2.13        | 4.52        |
| 2728      | <i>Adnp</i> <sup>+/-</sup> | Saline/DD | Male   | 0.00            | 3.71        | 4.52           | 4.73        | 5.64         | 6.53        | 4.34        | 1.46         | 1.77         | 2.63        | 3.34         | 0.49        | 2.31         | 3.56        | 1.10        | 3.08        |
| 2730      | <i>Adnp</i> <sup>+/-</sup> | Saline/DD | Male   | 1.26            | 3.47        | 4.13           | 4.46        | 4.93         | 6.44        | 4.11        | 1.98         | 2.22         | 3.24        | 3.59         | 0.83        | 2.75         | 3.10        | 1.92        | 4.40        |
| 2729      | <i>Adnp</i> <sup>+/-</sup> | Saline/DD | Male   | 1.28            | 3.56        | 4.21           | 4.54        | 5.30         | 6.06        | 4.25        | 2.51         | 2.83         | 2.94        | 3.15         | 0.81        | 2.41         | 4.19        | 2.83        | 4.34        |
| 2721      | <i>Adnp</i> <sup>+/-</sup> | Saline/DD | Female | 1.23            | 4.41        | 5.04           | 5.32        | 6.04         | 6.78        | 5.09        | 2.65         | 3.42         | 4.22        | 4.76         | 1.12        |              | 2.91        | 2.35        | 4.58        |
| 2714      | <i>Adnp</i> <sup>+/-</sup> | Saline/DD | Female | 1.10            | 2.49        | 2.74           | 2.72        | 3.54         | 5.53        | 2.81        | 1.76         | 2.31         | 3.46        | 2.25         | 1.29        |              | 2.02        | 2.08        | 3.41        |
| 2716      | <i>Adnp</i> <sup>+/-</sup> | Saline/DD | Female | 0.80            | 3.04        | 3.87           | 3.66        | 4.42         | 5.44        | 4.11        | 1.98         | 2.56         | 4.02        | 4.39         | 1.29        |              | 3.57        | 1.93        | 4.95        |
| 2712      | <i>Adnp</i> <sup>+/-</sup> | Saline/DD | Female | 1.40            | 3.35        | 4.24           | 3.81        | 5.03         | 5.25        | 3.95        | 1.48         | 1.59         | 1.08        | 2.99         | 1.37        |              | 1.20        | 1.08        | 4.03        |
| 2732      | <i>Adnp</i> <sup>+/-</sup> | Saline/DD | Female | 1.42            | 3.78        | 4.94           | 4.41        | 5.38         | 6.44        | 4.73        | 2.51         | 3.24         | 5.00        | 4.91         | 1.64        |              | 2.92        | 2.51        | 4.24        |
| 2734      | <i>Adnp</i> <sup>+/-</sup> | Saline/DD | Female | 0.97            | 3.21        | 3.38           | 3.85        | 4.17         | 5.12        | 3.27        | 1.83         | 2.17         | 2.78        | 3.21         | 0.91        |              | 1.23        | 2.06        | 5.00        |
| 2737      | <i>Adnp</i> <sup>+/-</sup> | Saline/DD | Female | 0.48            | 3.11        | 4.16           | 3.91        | 5.04         | 5.96        | 3.96        | 0.55         | 2.27         | 3.03        | 0.59         | 0.54        |              | 2.39        | 1.47        | 2.02        |
| 2726      | <i>Adnp</i> <sup>+/-</sup> | NAP       | Male   | 0.31            | 3.00        | 3.82           | 3.83        | 4.89         | 5.48        | 3.63        | 1.52         | 1.19         | 0.58        | 1.13         | 0.09        | 1.76         | 0.32        | 1.31        | 3.58        |
| 2739      | <i>Adnp</i> <sup>+/-</sup> | NAP       | Male   | 1.10            | 2.99        | 3.16           | 3.86        | 4.16         | 5.01        | 3.86        | 0.00         | 0.00         | 1.12        | 1.21         | 0.44        | 1.37         | 0.00        | 0.11        | 3.40        |
| 2753      | <i>Adnp</i> <sup>+/-</sup> | NAP       | Male   |                 | 2.88        | 3.45           | 3.56        | 3.90         | 4.62        | 2.92        | 0.09         | 0.25         | 1.08        | 2.37         | 0.35        | 0.91         | 1.59        | 0.19        | 2.17        |
| 2754      | <i>Adnp</i> <sup>+/-</sup> | NAP       | Male   | 1.24            | 3.62        | 3.95           | 4.62        | 4.91         | 6.20        | 3.07        | 1.22         | 1.70         | 2.69        | 0.98         | 0.98        | 1.44         | 2.09        | 0.98        | 2.39        |
| 2743      | <i>Adnp</i> <sup>+/-</sup> | NAP       | Female | 1.79            | 3.26        | 3.45           | 4.05        | 4.63         | 5.65        | 2.19        | 1.02         | 1.42         | 2.52        | 2.84         | 0.18        |              | 1.14        | 1.15        | 3.64        |
| 2749      | <i>Adnp</i> <sup>+/-</sup> | NAP       | Female | 1.60            | 3.65        | 4.87           | 3.99        | 5.20         | 6.01        | 4.59        | 1.32         | 2.03         | 2.75        | 2.42         | 0.50        |              | 1.84        | 1.46        | 3.23        |
| 2748      | <i>Adnp</i> <sup>+/-</sup> | NAP       | Female | 0.88            | 4.01        | 4.68           | 4.78        | 5.53         | 6.42        | 4.48        | 1.82         | 1.84         | 3.63        | 3.88         | 0.77        |              | 2.49        | 1.52        | 4.35        |
| 2741      | <i>Adnp</i> <sup>+/-</sup> | NAP       | Female | 2.19            | 3.67        | 3.97           | 4.52        | 4.63         | 6.41        | 3.74        | 0.47         | 1.62         | 1.77        | 2.45         | 0.80        |              | 2.06        | 0.62        | 3.01        |
| 2746      | <i>Adnp</i> <sup>+/-</sup> | NAP       | Female | 1.54            | 3.01        | 3.21           | 3.66        | 4.79         | 5.48        | 3.65        | 1.25         | 1.97         | 1.84        | 4.04         | 0.34        |              | 3.47        | 0.77        | 2.58        |

## Gene expression

| Mouse No. | Genotype                   | Treatment | Sex    | <i>Hsd17b2</i> | <i>ApoE</i> | <i>Gm21949</i> | <i>Lipa</i> | <i>Nlgn2</i> | <i>Pax6</i> | <i>Wfs1</i> | <i>Abcf3</i> | <i>Akt 1</i> | <i>Bmp4</i> | <i>Cdh17</i> | <i>Iba1</i> | <i>Kdm5d</i> | <i>Klf1</i> | <i>Mtor</i> | <i>Per1</i> |
|-----------|----------------------------|-----------|--------|----------------|-------------|----------------|-------------|--------------|-------------|-------------|--------------|--------------|-------------|--------------|-------------|--------------|-------------|-------------|-------------|
| 2758      | <i>Adnp</i> <sup>+/-</sup> | NAP       | Female | 1.47           | 3.13        | 3.56           | 3.87        | 4.20         | 4.47        | 4.35        | 1.44         | 1.37         | 0.11        |              | 0.00        |              | 3.09        | 0.63        | 1.89        |
| 2756      | <i>Adnp</i> <sup>+/-</sup> | NAP       | Female | 1.68           | 3.06        | 3.54           | 3.75        | 4.53         | 4.63        | 4.00        | 1.70         | 1.90         | 2.48        | 4.41         | 0.75        |              | 0.50        | 1.19        | 0.00        |
| 2750      | <i>Adnp</i> <sup>+/-</sup> | NAP       | Female | 1.70           | 3.56        | 4.24           | 4.15        | 4.70         | 6.13        | 3.97        | 1.73         | 2.60         | 4.99        | 3.74         | 0.78        |              | 3.03        | 1.92        | 5.15        |

**Table S23. Raw data for Ultrasonic Vocalization test results.**

| Number of USV per minute                      |                                                 |                                            |                                              |                                               |                                                 |                                            |                                              |
|-----------------------------------------------|-------------------------------------------------|--------------------------------------------|----------------------------------------------|-----------------------------------------------|-------------------------------------------------|--------------------------------------------|----------------------------------------------|
| <i>Adnp</i> <sup>+/+</sup><br>Male<br>+Saline | <i>Adnp</i> <sup>+/+</sup><br>Female<br>+Saline | <i>Adnp</i> <sup>+/+</sup><br>Male<br>+NAP | <i>Adnp</i> <sup>+/+</sup><br>Female<br>+NAP | <i>Adnp</i> <sup>+/-</sup><br>Male<br>+Saline | <i>Adnp</i> <sup>+/-</sup><br>Female<br>+Saline | <i>Adnp</i> <sup>+/-</sup><br>Male<br>+NAP | <i>Adnp</i> <sup>+/-</sup><br>Female<br>+NAP |
| 11                                            | 42                                              | 1                                          | 0                                            | 0                                             | 3                                               | 108                                        | 21                                           |
| 1                                             | 2                                               | 21                                         | 0                                            | 3                                             | 7                                               | 123                                        | 14                                           |
| 24                                            | 42                                              | 6                                          | 2                                            | 0                                             | 4                                               | 38                                         | 0                                            |
| 52                                            | 0                                               | 7                                          | 4                                            | 3                                             | 21                                              | 1                                          | 51                                           |
| 6                                             | 0                                               | 4                                          | 12                                           | 2                                             | 24                                              | 18                                         | 19                                           |
| 11                                            | 0                                               | 37                                         | 3                                            | 19                                            | 4                                               | 3                                          | 6                                            |
| 2                                             | 24                                              | 58                                         | 10                                           | 11                                            | 0                                               | 34                                         | 13                                           |
| 4                                             | 9                                               | 11                                         | 10                                           | 2                                             | 14                                              | 39                                         | 0                                            |
| 37                                            | 95                                              | 34                                         | 4                                            | 4                                             | 1                                               | 48                                         | 8                                            |
| 1                                             | 34                                              | 7                                          | 4                                            | 0                                             | 11                                              | 36                                         | 35                                           |
| 17                                            | 8                                               | 0                                          | 2                                            | 22                                            | 3                                               | 13                                         | 13                                           |
| 12                                            | 9                                               | 6                                          | 0                                            | 0                                             | 7                                               | 2                                          | 35                                           |
| 0                                             | 15                                              | 50                                         | 58                                           | 0                                             | 0                                               | 40                                         | 5                                            |
| 2                                             | 39                                              | 12                                         | 52                                           | 4                                             | 0                                               | 0                                          | 1                                            |
| 14                                            | 0                                               | 25                                         | 25                                           | 31                                            | 3                                               | 101                                        | 25                                           |
| 4                                             | 9                                               | 9                                          | 3                                            | 17                                            | 13                                              | 46                                         | 0                                            |
| 10                                            | 1                                               | 4                                          | 4                                            | 1                                             | 12                                              | 4                                          | 23                                           |
| 0                                             | 7                                               | 0                                          | 26                                           | 23                                            | 0                                               | 42                                         | 6                                            |
| 17                                            | 5                                               | 42                                         | 17                                           | 0                                             | 2                                               | 95                                         | 6                                            |
| 35                                            | 67                                              | 15                                         | 14                                           | 27                                            | 2                                               | 39                                         | 33                                           |
| 3                                             | 19                                              | 5                                          | 36                                           | 0                                             | 7                                               | 66                                         | 9                                            |
| 6                                             | 3                                               | 48                                         | 15                                           | 2                                             | 0                                               | 27                                         | 33                                           |
| 0                                             | 6                                               | 24                                         | 31                                           | 10                                            | 0                                               | 15                                         | 0                                            |
| 2                                             | 37                                              | 33                                         | 0                                            | 15                                            | 8                                               | 57                                         | 0                                            |
| 54                                            | 40                                              | 13                                         | 20                                           | 34                                            | 0                                               | 48                                         | 26                                           |
| 0                                             | 0                                               | 10                                         | 24                                           | 3                                             | 13                                              | 34                                         | 5                                            |
| 6                                             | 35                                              | 33                                         | 0                                            | 11                                            | 18                                              | 4                                          | 25                                           |
| 25                                            | 0                                               | 23                                         | 0                                            | 0                                             | 0                                               | 26                                         | 0                                            |
| 4                                             | 6                                               | 4                                          | 37                                           | 20                                            | 9                                               | 8                                          | 0                                            |
| 0                                             | 2                                               | 3                                          | 12                                           | 0                                             | 0                                               | 21                                         | 45                                           |
| 25                                            | 66                                              | 1                                          | 1                                            | 4                                             | 8                                               | 0                                          |                                              |
| 0                                             | 34                                              | 1                                          | 10                                           | 2                                             | 13                                              | 0                                          |                                              |
| 12                                            | 18                                              | 0                                          | 0                                            | 9                                             | 3                                               | 40                                         |                                              |
| 0                                             | 0                                               | 7                                          | 8                                            | 6                                             | 0                                               | 7                                          |                                              |
| 1                                             | 4                                               | 82                                         | 0                                            | 10                                            | 28                                              | 0                                          |                                              |
| 39                                            | 3                                               | 10                                         | 17                                           | 38                                            | 0                                               | 22                                         |                                              |
| 0                                             | 0                                               | 31                                         | 12                                           | 0                                             | 0                                               |                                            |                                              |



| Number of USV per minute                      |                                                 |                                            |                                              |                                               |                                                 |                                            |                                              |
|-----------------------------------------------|-------------------------------------------------|--------------------------------------------|----------------------------------------------|-----------------------------------------------|-------------------------------------------------|--------------------------------------------|----------------------------------------------|
| <i>Adnp</i> <sup>+/+</sup><br>Male<br>+Saline | <i>Adnp</i> <sup>+/+</sup><br>Female<br>+Saline | <i>Adnp</i> <sup>+/+</sup><br>Male<br>+NAP | <i>Adnp</i> <sup>+/+</sup><br>Female<br>+NAP | <i>Adnp</i> <sup>-/-</sup><br>Male<br>+Saline | <i>Adnp</i> <sup>-/-</sup><br>Female<br>+Saline | <i>Adnp</i> <sup>-/-</sup><br>Male<br>+NAP | <i>Adnp</i> <sup>-/-</sup><br>Female<br>+NAP |
| 0                                             | 25                                              | 4                                          | 12                                           | 29                                            | 0                                               |                                            |                                              |
| 9                                             | 13                                              | 0                                          | 3                                            | 0                                             | 15                                              |                                            |                                              |
| 16                                            | 0                                               | 4                                          | 24                                           | 0                                             | 16                                              |                                            |                                              |
| 0                                             | 19                                              | 19                                         | 39                                           | 1                                             | 0                                               |                                            |                                              |
| 19                                            | 95                                              | 0                                          | 0                                            | 2                                             | 0                                               |                                            |                                              |
| 2                                             | 0                                               | 21                                         | 0                                            | 0                                             | 24                                              |                                            |                                              |
| 14                                            | 4                                               | 20                                         | 60                                           | 0                                             | 0                                               |                                            |                                              |
| 1                                             | 0                                               | 14                                         | 52                                           | 60                                            | 3                                               |                                            |                                              |
| 1                                             | 0                                               | 0                                          | 0                                            | 2                                             | 0                                               |                                            |                                              |
| 53                                            | 0                                               | 19                                         | 0                                            | 27                                            | 16                                              |                                            |                                              |
| 39                                            | 0                                               | 38                                         | 23                                           | 0                                             | 11                                              |                                            |                                              |
| 0                                             | 0                                               | 1                                          | 9                                            | 0                                             |                                                 |                                            |                                              |
| 3                                             | 4                                               | 12                                         | 0                                            | 0                                             |                                                 |                                            |                                              |
| 39                                            | 0                                               | 21                                         | 10                                           | 6                                             |                                                 |                                            |                                              |
| 0                                             | 1                                               | 0                                          | 0                                            | 0                                             |                                                 |                                            |                                              |
| 26                                            | 1                                               | 20                                         | 0                                            | 0                                             |                                                 |                                            |                                              |
| 0                                             | 10                                              | 0                                          | 0                                            | 22                                            |                                                 |                                            |                                              |
| 0                                             | 6                                               | 0                                          | 26                                           |                                               |                                                 |                                            |                                              |
| 4                                             | 0                                               | 35                                         | 2                                            |                                               |                                                 |                                            |                                              |
| 0                                             | 0                                               | 27                                         | 2                                            |                                               |                                                 |                                            |                                              |
| 8                                             | 6                                               | 4                                          | 68                                           |                                               |                                                 |                                            |                                              |
| 32                                            | 0                                               | 0                                          | 35                                           |                                               |                                                 |                                            |                                              |
| 2                                             | 0                                               | 19                                         | 8                                            |                                               |                                                 |                                            |                                              |
| 5                                             | 3                                               | 85                                         | 0                                            |                                               |                                                 |                                            |                                              |
| 12                                            | 12                                              | 42                                         | 0                                            |                                               |                                                 |                                            |                                              |
| 0                                             | 9                                               | 2                                          | 12                                           |                                               |                                                 |                                            |                                              |
| 1                                             | 441                                             | 0                                          | 0                                            |                                               |                                                 |                                            |                                              |
| 0                                             | 0                                               | 0                                          | 7                                            |                                               |                                                 |                                            |                                              |
| 0                                             | 2                                               | 1                                          | 13                                           |                                               |                                                 |                                            |                                              |
|                                               |                                                 | 0                                          | 0                                            |                                               |                                                 |                                            |                                              |
|                                               |                                                 | 4                                          | 0                                            |                                               |                                                 |                                            |                                              |
|                                               |                                                 | 0                                          | 1                                            |                                               |                                                 |                                            |                                              |
|                                               |                                                 | 51                                         | 68                                           |                                               |                                                 |                                            |                                              |
|                                               |                                                 | 0                                          | 0                                            |                                               |                                                 |                                            |                                              |
|                                               |                                                 | 37                                         | 10                                           |                                               |                                                 |                                            |                                              |
|                                               |                                                 | 7                                          | 39                                           |                                               |                                                 |                                            |                                              |
|                                               |                                                 | 94                                         | 19                                           |                                               |                                                 |                                            |                                              |
|                                               |                                                 | 2                                          | 0                                            |                                               |                                                 |                                            |                                              |
|                                               |                                                 | 0                                          | 0                                            |                                               |                                                 |                                            |                                              |

| Number of USV per minute                      |                                                 |                                            |                                              |                                               |                                                 |                                            |                                              |
|-----------------------------------------------|-------------------------------------------------|--------------------------------------------|----------------------------------------------|-----------------------------------------------|-------------------------------------------------|--------------------------------------------|----------------------------------------------|
| <i>Adnp</i> <sup>+/+</sup><br>Male<br>+Saline | <i>Adnp</i> <sup>+/+</sup><br>Female<br>+Saline | <i>Adnp</i> <sup>+/+</sup><br>Male<br>+NAP | <i>Adnp</i> <sup>+/+</sup><br>Female<br>+NAP | <i>Adnp</i> <sup>+/-</sup><br>Male<br>+Saline | <i>Adnp</i> <sup>+/-</sup><br>Female<br>+Saline | <i>Adnp</i> <sup>+/-</sup><br>Male<br>+NAP | <i>Adnp</i> <sup>+/-</sup><br>Female<br>+NAP |
|                                               |                                                 | 8                                          | 0                                            |                                               |                                                 |                                            |                                              |
|                                               |                                                 | 0                                          | 1                                            |                                               |                                                 |                                            |                                              |
|                                               |                                                 |                                            | 49                                           |                                               |                                                 |                                            |                                              |
|                                               |                                                 |                                            | 1                                            |                                               |                                                 |                                            |                                              |
|                                               |                                                 |                                            | 17                                           |                                               |                                                 |                                            |                                              |
|                                               |                                                 |                                            | 0                                            |                                               |                                                 |                                            |                                              |
|                                               |                                                 |                                            | 0                                            |                                               |                                                 |                                            |                                              |
|                                               |                                                 |                                            | 5                                            |                                               |                                                 |                                            |                                              |
|                                               |                                                 |                                            | 47                                           |                                               |                                                 |                                            |                                              |
|                                               |                                                 |                                            | 0                                            |                                               |                                                 |                                            |                                              |
|                                               |                                                 |                                            | 1                                            |                                               |                                                 |                                            |                                              |
|                                               |                                                 |                                            | 0                                            |                                               |                                                 |                                            |                                              |
|                                               |                                                 |                                            | 0                                            |                                               |                                                 |                                            |                                              |
|                                               |                                                 |                                            | 0                                            |                                               |                                                 |                                            |                                              |

**Table S24. Raw data for developmental milestone test results.**

| Mouse No. | Genotype                   | Treatment | Sex  | Developmental Milestones |              |                   |
|-----------|----------------------------|-----------|------|--------------------------|--------------|-------------------|
|           |                            |           |      | Ear twitch               | Air righting | Negative geotaxis |
| 2973      | <i>Adnp</i> <sup>+/+</sup> | Saline/DD | Male | 13                       | 15           | 3                 |
| 2984      | <i>Adnp</i> <sup>+/+</sup> | Saline/DD | Male | 16                       | 12           | 5                 |
| 2983      | <i>Adnp</i> <sup>+/+</sup> | Saline/DD | Male | 11                       | 12           | 1                 |
| 2996      | <i>Adnp</i> <sup>+/+</sup> | Saline/DD | Male | 11                       | 9            | 5                 |
| 2994      | <i>Adnp</i> <sup>+/+</sup> | Saline/DD | Male | 11                       | 16           | 5                 |
| 2993      | <i>Adnp</i> <sup>+/+</sup> | Saline/DD | Male | 16                       | 13           | 1                 |
| 2992      | <i>Adnp</i> <sup>+/+</sup> | Saline/DD | Male | 12                       | 13           | 7                 |
| 3003      | <i>Adnp</i> <sup>+/+</sup> | Saline/DD | Male | 10                       | 12           | 9                 |
| 3019      | <i>Adnp</i> <sup>+/+</sup> | Saline/DD | Male | 9                        | 10           | 1                 |
| 3020      | <i>Adnp</i> <sup>+/+</sup> | Saline/DD | Male | 10                       | 11           | 4                 |
| 3021      | <i>Adnp</i> <sup>+/+</sup> | Saline/DD | Male | 10                       | 8            | 4                 |
| 3295      | <i>Adnp</i> <sup>+/+</sup> | Saline/DD | Male | 11                       | 12           | 3                 |
| 3296      | <i>Adnp</i> <sup>+/+</sup> | Saline/DD | Male | 9                        | 11           | 2                 |
| 3299      | <i>Adnp</i> <sup>+/+</sup> | Saline/DD | Male | 10                       | 11           | 3                 |
| 3307      | <i>Adnp</i> <sup>+/+</sup> | Saline/DD | Male | 9                        | 13           | 2                 |
| 3308      | <i>Adnp</i> <sup>+/+</sup> | Saline/DD | Male | 10                       | 11           | 2                 |
| 3315      | <i>Adnp</i> <sup>+/+</sup> | Saline/DD | Male | 10                       | 13           | 2                 |
| 3317      | <i>Adnp</i> <sup>+/+</sup> | Saline/DD | Male | 10                       | 13           | 3                 |
| 3324      | <i>Adnp</i> <sup>+/+</sup> | Saline/DD | Male | 10                       | 12           | 2                 |
| 3334      | <i>Adnp</i> <sup>+/+</sup> | Saline/DD | Male | 10                       | 9            | 2                 |
| 7S1       | <i>Adnp</i> <sup>+/+</sup> | Saline/DD | Male | N/A                      | 11           | 1                 |

| Mouse No. | Genotype                   | Treatment | Sex    | Developmental Milestones |              |                   |
|-----------|----------------------------|-----------|--------|--------------------------|--------------|-------------------|
|           |                            |           |        | Ear twitch               | Air righting | Negative geotaxis |
| 7S2       | <i>Adnp</i> <sup>+/+</sup> | Saline/DD | Male   | N/A                      | 11           | 2                 |
| 8S1       | <i>Adnp</i> <sup>+/+</sup> | Saline/DD | Male   | N/A                      | 13           | 2                 |
| 9S5       | <i>Adnp</i> <sup>+/+</sup> | Saline/DD | Male   | N/A                      | 12           | 1                 |
| 11S3      | <i>Adnp</i> <sup>+/+</sup> | Saline/DD | Male   | N/A                      | 14           | 6                 |
| 12S1      | <i>Adnp</i> <sup>+/+</sup> | Saline/DD | Male   | N/A                      | 14           | 3                 |
| 12S2      | <i>Adnp</i> <sup>+/+</sup> | Saline/DD | Male   | N/A                      | 13           | 2                 |
| 2963      | <i>Adnp</i> <sup>+/+</sup> | Saline/DD | Female | 16                       | 11           | 6                 |
| 2968      | <i>Adnp</i> <sup>+/+</sup> | Saline/DD | Female | 16                       | 14           | 4                 |
| 2981      | <i>Adnp</i> <sup>+/+</sup> | Saline/DD | Female | 11                       | 11           | 3                 |
| 2977      | <i>Adnp</i> <sup>+/+</sup> | Saline/DD | Female | 10                       | 14           | 6                 |
| 2990      | <i>Adnp</i> <sup>+/+</sup> | Saline/DD | Female | 10                       | 12           | 7                 |
| 3001      | <i>Adnp</i> <sup>+/+</sup> | Saline/DD | Female | 12                       | 12           | 1                 |
| 3002      | <i>Adnp</i> <sup>+/+</sup> | Saline/DD | Female | 11                       | 15           | 7                 |
| 3055      | <i>Adnp</i> <sup>+/+</sup> | Saline/DD | Female | 9                        | 11           | 4                 |
| 3070      | <i>Adnp</i> <sup>+/+</sup> | Saline/DD | Female | 9                        | 10           | 2                 |
| 3066      | <i>Adnp</i> <sup>+/+</sup> | Saline/DD | Female | 9                        | 11           | 3                 |
| 3071      | <i>Adnp</i> <sup>+/+</sup> | Saline/DD | Female | 10                       | 11           | 2                 |
| 3309      | <i>Adnp</i> <sup>+/+</sup> | Saline/DD | Female | 11                       | 12           | 1                 |
| 3323      | <i>Adnp</i> <sup>+/+</sup> | Saline/DD | Female | 10                       | 9            | 4                 |
| 3327      | <i>Adnp</i> <sup>+/+</sup> | Saline/DD | Female | 11                       | 14           | 5                 |
| 3329      | <i>Adnp</i> <sup>+/+</sup> | Saline/DD | Female | 10                       | 12           | 4                 |
| 8S2       | <i>Adnp</i> <sup>+/+</sup> | Saline/DD | Female | N/A                      | 12           | 2                 |
| 8S3       | <i>Adnp</i> <sup>+/+</sup> | Saline/DD | Female | N/A                      | 12           | 2                 |
| 9S1       | <i>Adnp</i> <sup>+/+</sup> | Saline/DD | Female | N/A                      | 10           | 4                 |
| 10S1      | <i>Adnp</i> <sup>+/+</sup> | Saline/DD | Female | N/A                      | 13           | 2                 |
| 10S2      | <i>Adnp</i> <sup>+/+</sup> | Saline/DD | Female | N/A                      | 11           | 4                 |
| 10S6      | <i>Adnp</i> <sup>+/+</sup> | Saline/DD | Female | N/A                      | 10           | 3                 |
| 11S1      | <i>Adnp</i> <sup>+/+</sup> | Saline/DD | Female | N/A                      | 15           | 3                 |
| 11S4      | <i>Adnp</i> <sup>+/+</sup> | Saline/DD | Female | N/A                      | 15           | 3                 |
| 12S3      | <i>Adnp</i> <sup>+/+</sup> | Saline/DD | Female | N/A                      | 13           | 2                 |
| 2970      | <i>Adnp</i> <sup>+/-</sup> | Saline/DD | Male   | 13                       | 16           | 11                |
| 2969      | <i>Adnp</i> <sup>+/-</sup> | Saline/DD | Male   | 11                       | 15           | 4                 |
| 2985      | <i>Adnp</i> <sup>+/-</sup> | Saline/DD | Male   | 10                       | 13           | 7                 |
| 3004      | <i>Adnp</i> <sup>+/-</sup> | Saline/DD | Male   | 9                        | 13           | 8                 |
| 3056      | <i>Adnp</i> <sup>+/-</sup> | Saline/DD | Male   | 8                        | 11           | 6                 |
| 3069      | <i>Adnp</i> <sup>+/-</sup> | Saline/DD | Male   | 9                        | 9            | 3                 |
| 3298      | <i>Adnp</i> <sup>+/-</sup> | Saline/DD | Male   | 10                       | 11           | 7                 |
| 3301      | <i>Adnp</i> <sup>+/-</sup> | Saline/DD | Male   | 10                       | 13           | 7                 |
| 3305      | <i>Adnp</i> <sup>+/-</sup> | Saline/DD | Male   | 10                       | 13           | 6                 |
| 3311      | <i>Adnp</i> <sup>+/-</sup> | Saline/DD | Male   | 8                        | 9            | 1                 |
| 3330      | <i>Adnp</i> <sup>+/-</sup> | Saline/DD | Male   | 9                        | 9            | 4                 |
| 3336      | <i>Adnp</i> <sup>+/-</sup> | Saline/DD | Male   | 9                        | 9            | 7                 |

| Mouse No. | Genotype                   | Treatment | Sex    | Developmental Milestones |              |                   |
|-----------|----------------------------|-----------|--------|--------------------------|--------------|-------------------|
|           |                            |           |        | Ear twitch               | Air righting | Negative geotaxis |
| 8S4       | <i>Adnp</i> <sup>+/-</sup> | Saline/DD | Male   | N/A                      | 9            | 8                 |
| 9S2       | <i>Adnp</i> <sup>+/-</sup> | Saline/DD | Male   | N/A                      | 9            | 1                 |
| 9S3       | <i>Adnp</i> <sup>+/-</sup> | Saline/DD | Male   | N/A                      | 13           | 6                 |
| 9S4       | <i>Adnp</i> <sup>+/-</sup> | Saline/DD | Male   | N/A                      | 11           | 2                 |
| 10S4      | <i>Adnp</i> <sup>+/-</sup> | Saline/DD | Male   | N/A                      | 9            | 3                 |
| 11S2      | <i>Adnp</i> <sup>+/-</sup> | Saline/DD | Male   | N/A                      | 16           | 5                 |
| 2974      | <i>Adnp</i> <sup>+/-</sup> | Saline/DD | Female | 12                       | 13           | 7                 |
| 3024      | <i>Adnp</i> <sup>+/-</sup> | Saline/DD | Female | 12                       | 11           | 3                 |
| 3023      | <i>Adnp</i> <sup>+/-</sup> | Saline/DD | Female | 11                       | 11           | 8                 |
| 3146      | <i>Adnp</i> <sup>+/-</sup> | Saline/DD | Female | 8                        | 11           | 7                 |
| 3074      | <i>Adnp</i> <sup>+/-</sup> | Saline/DD | Female | 8                        | 13           | 8                 |
| 3314      | <i>Adnp</i> <sup>+/-</sup> | Saline/DD | Female | 8                        | 15           | 8                 |
| 3321      | <i>Adnp</i> <sup>+/-</sup> | Saline/DD | Female | 8                        | 12           | 2                 |
| 8S5       | <i>Adnp</i> <sup>+/-</sup> | Saline/DD | Female | N/A                      | 14           | 9                 |
| 10S3      | <i>Adnp</i> <sup>+/-</sup> | Saline/DD | Female | N/A                      | 11           | 6                 |
| 10S5      | <i>Adnp</i> <sup>+/-</sup> | Saline/DD | Female | N/A                      | 16           | 7                 |
| 12S4      | <i>Adnp</i> <sup>+/-</sup> | Saline/DD | Female | N/A                      | 14           | 5                 |
| 2971      | <i>Adnp</i> <sup>+/+</sup> | NAP       | Male   | 13                       | 14           | 3                 |
| 2972      | <i>Adnp</i> <sup>+/+</sup> | NAP       | Male   | 14                       | 13           | 8                 |
| 2986      | <i>Adnp</i> <sup>+/+</sup> | NAP       | Male   | 12                       | 14           | 7                 |
| 3005      | <i>Adnp</i> <sup>+/+</sup> | NAP       | Male   | 12                       | 13           | 5                 |
| 3053      | <i>Adnp</i> <sup>+/+</sup> | NAP       | Male   | 9                        | 10           | 4                 |
| 3073      | <i>Adnp</i> <sup>+/+</sup> | NAP       | Male   | 8                        | 8            | 1                 |
| 3147      | <i>Adnp</i> <sup>+/+</sup> | NAP       | Male   | 9                        | 11           | 1                 |
| 3294      | <i>Adnp</i> <sup>+/+</sup> | NAP       | Male   | 11                       | 11           | 3                 |
| 3297      | <i>Adnp</i> <sup>+/+</sup> | NAP       | Male   | 9                        | 10           | 2                 |
| 3303      | <i>Adnp</i> <sup>+/+</sup> | NAP       | Male   | 10                       | 10           | 3                 |
| 3312      | <i>Adnp</i> <sup>+/+</sup> | NAP       | Male   | 11                       | 9            | 2                 |
| 3333      | <i>Adnp</i> <sup>+/+</sup> | NAP       | Male   | 10                       | 11           | 4                 |
| 7N1       | <i>Adnp</i> <sup>+/+</sup> | NAP       | Male   | N/A                      | 11           | 2                 |
| 7N3       | <i>Adnp</i> <sup>+/+</sup> | NAP       | Male   | N/A                      | 9            | 2                 |
| 8N3       | <i>Adnp</i> <sup>+/+</sup> | NAP       | Male   | N/A                      | 10           | 2                 |
| 9N3       | <i>Adnp</i> <sup>+/+</sup> | NAP       | Male   | N/A                      | 8            | 2                 |
| 9N4       | <i>Adnp</i> <sup>+/+</sup> | NAP       | Male   | N/A                      | 8            | 2                 |
| 10N1      | <i>Adnp</i> <sup>+/+</sup> | NAP       | Male   | N/A                      | 9            | 1                 |
| 11N5      | <i>Adnp</i> <sup>+/+</sup> | NAP       | Male   | N/A                      | 11           | 2                 |
| 2966      | <i>Adnp</i> <sup>+/+</sup> | NAP       | Female | 14                       | 12           | 5                 |
| 2975      | <i>Adnp</i> <sup>+/+</sup> | NAP       | Female | 11                       | 11           | 5                 |
| 2980      | <i>Adnp</i> <sup>+/+</sup> | NAP       | Female | 14                       | 15           | 5                 |
| 2991      | <i>Adnp</i> <sup>+/+</sup> | NAP       | Female | 12                       | 11           | 2                 |
| 2988      | <i>Adnp</i> <sup>+/+</sup> | NAP       | Female | 11                       | 13           | 3                 |
| 2999      | <i>Adnp</i> <sup>+/+</sup> | NAP       | Female | 12                       | 13           | 7                 |

| Mouse No. | Genotype                   | Treatment | Sex    | Developmental Milestones |              |                   |
|-----------|----------------------------|-----------|--------|--------------------------|--------------|-------------------|
|           |                            |           |        | Ear twitch               | Air righting | Negative geotaxis |
| 3054      | <i>Adnp</i> <sup>+/+</sup> | NAP       | Female | 9                        | 8            | 2                 |
| 3025      | <i>Adnp</i> <sup>+/+</sup> | NAP       | Female | 9                        | 10           | 3                 |
| 3018      | <i>Adnp</i> <sup>+/+</sup> | NAP       | Female | 8                        | 10           | 3                 |
| 3068      | <i>Adnp</i> <sup>+/+</sup> | NAP       | Female | 7                        | 11           | 1                 |
| 3302      | <i>Adnp</i> <sup>+/+</sup> | NAP       | Female | 11                       | 12           | 2                 |
| 3304      | <i>Adnp</i> <sup>+/+</sup> | NAP       | Female | 10                       | 9            | 2                 |
| 3306      | <i>Adnp</i> <sup>+/+</sup> | NAP       | Female | 10                       | 11           | 4                 |
| 3313      | <i>Adnp</i> <sup>+/+</sup> | NAP       | Female | 8                        | 9            | 2                 |
| 3318      | <i>Adnp</i> <sup>+/+</sup> | NAP       | female | 7                        | 9            | 2                 |
| 3319      | <i>Adnp</i> <sup>+/+</sup> | NAP       | female | 10                       | 10           | 2                 |
| 3331      | <i>Adnp</i> <sup>+/+</sup> | NAP       | Female | 10                       | 9            | 4                 |
| 3332      | <i>Adnp</i> <sup>+/+</sup> | NAP       | Female | 11                       | 11           | 3                 |
| 3335      | <i>Adnp</i> <sup>+/+</sup> | NAP       | Female | 9                        | 10           | 2                 |
| 8N1       | <i>Adnp</i> <sup>+/+</sup> | NAP       | Female | N/A                      | 9            | 2                 |
| 9N5       | <i>Adnp</i> <sup>+/+</sup> | NAP       | Female | N/A                      | 8            | 1                 |
| 10N6      | <i>Adnp</i> <sup>+/+</sup> | NAP       | Female | N/A                      | 10           | 3                 |
| 11N1      | <i>Adnp</i> <sup>+/+</sup> | NAP       | Female | N/A                      | 10           | 3                 |
| 11N2      | <i>Adnp</i> <sup>+/+</sup> | NAP       | Female | N/A                      | 8            | 3                 |
| 12N1      | <i>Adnp</i> <sup>+/+</sup> | NAP       | Female | N/A                      | 8            | 3                 |
| 12N3      | <i>Adnp</i> <sup>+/+</sup> | NAP       | Female | N/A                      | 9            | 3                 |
| 2995      | <i>Adnp</i> <sup>+/-</sup> | NAP       | Male   | 9                        | 13           | 7                 |
| 2982      | <i>Adnp</i> <sup>+/-</sup> | NAP       | Male   | 11                       | 11           | 5                 |
| 3065      | <i>Adnp</i> <sup>+/-</sup> | NAP       | Male   | 8                        | 10           | 6                 |
| 3017      | <i>Adnp</i> <sup>+/-</sup> | NAP       | Male   | 8                        | 10           | 3                 |
| 3067      | <i>Adnp</i> <sup>+/-</sup> | NAP       | Male   | 7                        | 11           | 4                 |
| 3300      | <i>Adnp</i> <sup>+/-</sup> | NAP       | Male   | 9                        | 12           | 3                 |
| 3316      | <i>Adnp</i> <sup>+/-</sup> | NAP       | Male   | 7                        | 11           | 5                 |
| 3328      | <i>Adnp</i> <sup>+/-</sup> | NAP       | Male   | 8                        | 12           | 7                 |
| 7N2       | <i>Adnp</i> <sup>+/-</sup> | NAP       | Male   | N/A                      | 10           | 2                 |
| 8N4       | <i>Adnp</i> <sup>+/-</sup> | NAP       | Male   | N/A                      | 8            | 1                 |
| 8N5       | <i>Adnp</i> <sup>+/-</sup> | NAP       | Male   | N/A                      | 9            | 6                 |
| 9N2       | <i>Adnp</i> <sup>+/-</sup> | NAP       | Male   | N/A                      | 11           | 5                 |
| 10N4      | <i>Adnp</i> <sup>+/-</sup> | NAP       | Male   | N/A                      | 10           | 5                 |
| 12N4      | <i>Adnp</i> <sup>+/-</sup> | NAP       | Male   | N/A                      | 8            | 2                 |
| 12N5      | <i>Adnp</i> <sup>+/-</sup> | NAP       | Male   | N/A                      | 8            | 2                 |
| 2964      | <i>Adnp</i> <sup>+/-</sup> | NAP       | Female | 13                       | 13           | 10                |
| 2965      | <i>Adnp</i> <sup>+/-</sup> | NAP       | Female | 12                       | 11           | 8                 |
| 2967      | <i>Adnp</i> <sup>+/-</sup> | NAP       | Female | 8                        | 12           | 9                 |
| 2976      | <i>Adnp</i> <sup>+/-</sup> | NAP       | Female | 12                       | 8            | 7                 |
| 2978      | <i>Adnp</i> <sup>+/-</sup> | NAP       | Female | 11                       | 12           | 2                 |
| 2979      | <i>Adnp</i> <sup>+/-</sup> | NAP       | Female | 12                       | 13           | 6                 |
| 2989      | <i>Adnp</i> <sup>+/-</sup> | NAP       | Female | 8                        | 11           | 9                 |

| Mouse No. | Genotype                   | Treatment | Sex    | Developmental Milestones |              |                   |
|-----------|----------------------------|-----------|--------|--------------------------|--------------|-------------------|
|           |                            |           |        | Ear twitch               | Air righting | Negative geotaxis |
| 2987      | <i>Adnp</i> <sup>+/-</sup> | NAP       | Female | 10                       | 10           | 2                 |
| 2998      | <i>Adnp</i> <sup>+/-</sup> | NAP       | Female | 9                        | 14           | 4                 |
| 3000      | <i>Adnp</i> <sup>+/-</sup> | NAP       | Female | 9                        | 13           | 6                 |
| 2997      | <i>Adnp</i> <sup>+/-</sup> | NAP       | Female | 10                       | 15           | 8                 |
| 3057      | <i>Adnp</i> <sup>+/-</sup> | NAP       | Female | 8                        | 11           | 6                 |
| 3148      | <i>Adnp</i> <sup>+/-</sup> | NAP       | Female | 8                        | 11           | 2                 |
| 3072      | <i>Adnp</i> <sup>+/-</sup> | NAP       | Female | 7                        | 9            | 3                 |
| 3075      | <i>Adnp</i> <sup>+/-</sup> | NAP       | Female | 7                        | 10           | 3                 |
| 3310      | <i>Adnp</i> <sup>+/-</sup> | NAP       | Female | 10                       | 10           | 2                 |
| 3320      | <i>Adnp</i> <sup>+/-</sup> | NAP       | Female | 9                        | 12           | 1                 |
| 3322      | <i>Adnp</i> <sup>+/-</sup> | NAP       | Female | 7                        | 12           | 2                 |
| 3325      | <i>Adnp</i> <sup>+/-</sup> | NAP       | Female | 10                       | 12           | 6                 |
| 3326      | <i>Adnp</i> <sup>+/-</sup> | NAP       | Female | 10                       | 13           | 3                 |
| 8N2       | <i>Adnp</i> <sup>+/-</sup> | NAP       | Female | N/A                      | 10           | 2                 |
| 9N1       | <i>Adnp</i> <sup>+/-</sup> | NAP       | Female | N/A                      | 11           | 1                 |
| 10N2      | <i>Adnp</i> <sup>+/-</sup> | NAP       | Female | N/A                      | 8            | 7                 |
| 10N3      | <i>Adnp</i> <sup>+/-</sup> | NAP       | Female | N/A                      | 10           | 3                 |
| 10N5      | <i>Adnp</i> <sup>+/-</sup> | NAP       | Female | N/A                      | 10           | 2                 |
| 11N3      | <i>Adnp</i> <sup>+/-</sup> | NAP       | Female | N/A                      | 8            | 4                 |
| 11N4      | <i>Adnp</i> <sup>+/-</sup> | NAP       | Female | N/A                      | 11           | 4                 |
| 12N2      | <i>Adnp</i> <sup>+/-</sup> | NAP       | Female | N/A                      | 10           | 2                 |

**Table S25. Raw data for Weight measurement results.**

| Number | Genotype                  | Treatment | Weight (gr) |      |      |      |      |      |      |      |      |      |      |      |      |       |       |       |       |       |       |       |       |       |
|--------|---------------------------|-----------|-------------|------|------|------|------|------|------|------|------|------|------|------|------|-------|-------|-------|-------|-------|-------|-------|-------|-------|
|        |                           |           | 0           | 1    | 2    | 3    | 4    | 5    | 6    | 7    | 8    | 9    | 10   | 11   | 12   | 13    | 14    | 15    | 16    | 17    | 18    | 19    | 20    | 21    |
| 2973   | <i>Adnp<sup>+/+</sup></i> | Saline/DD | 1.80        | 2.10 | 2.60 | 2.90 | 3.50 | 4.00 | 4.70 | 5.00 | 5.50 | 6.10 | 6.50 | 6.90 | 7.30 | 7.80  | 8.00  | 8.30  | 8.80  | 9.20  | 10.10 | 10.80 | 11.90 | 13.43 |
| 2984   | <i>Adnp<sup>+/+</sup></i> | Saline/DD | 2.02        | 2.20 | 2.40 | 3.00 | 3.20 | 3.80 | 4.30 | 5.00 | 5.10 | 5.60 | 5.90 | 6.20 | 6.70 | 6.90  | 7.10  | 7.10  | 7.70  | 8.20  | 8.40  | 9.10  | 10.20 | 11.27 |
| 2983   | <i>Adnp<sup>+/+</sup></i> | Saline/DD | 2.06        | 2.30 | 2.50 | 2.90 | 3.20 | 3.60 | 4.20 | 4.80 | 5.20 | 5.30 | 5.70 | 5.50 | 6.00 | 6.00  | 6.30  | 6.60  | 7.10  | 7.30  | 7.40  | 7.60  | 8.80  | 9.44  |
| 2996   | <i>Adnp<sup>+/+</sup></i> | Saline/DD | 2.17        | 2.40 | 2.90 | 3.60 | 3.90 | 4.70 | 5.40 | 6.00 | 6.60 | 7.20 | 7.90 | 8.40 | 8.90 | 9.20  | 9.70  | 9.50  | 9.60  | 9.90  | 11.20 | 12.50 | 14.16 | 15.76 |
| 2994   | <i>Adnp<sup>+/+</sup></i> | Saline/DD | 1.92        | 2.10 | 2.60 | 3.30 | 3.80 | 4.60 | 5.30 | 5.90 | 6.20 | 6.90 | 7.50 | 7.90 | 8.20 | 8.60  | 8.60  | 8.60  | 8.60  | 8.70  | 9.90  | 11.00 | 12.32 | 13.88 |
| 2993   | <i>Adnp<sup>+/+</sup></i> | Saline/DD | 1.95        | 2.20 | 2.60 | 3.20 | 3.70 | 4.40 | 4.90 | 5.60 | 6.00 | 6.90 | 7.40 | 8.00 | 8.50 | 8.90  | 9.20  | 9.40  | 9.40  | 9.60  | 10.90 | 11.90 | 13.30 | 14.72 |
| 2992   | <i>Adnp<sup>+/+</sup></i> | Saline/DD | 2.05        | 2.30 | 2.80 | 3.40 | 4.00 | 4.70 | 5.30 | 5.90 | 6.10 | 7.00 | 7.30 | 8.00 | 8.30 | 8.70  | 8.80  | 9.20  | 9.10  | 9.30  | 10.60 | 11.60 | 13.20 | 14.50 |
| 3003   | <i>Adnp<sup>+/+</sup></i> | Saline/DD | 1.63        | 1.90 | 2.20 | 2.70 | 3.20 | 3.70 | 4.30 | 5.00 | 5.40 | 6.40 | 6.90 | 7.60 | 8.20 | 8.20  | 8.80  | 9.10  | 9.60  | 9.80  | 10.30 | 11.70 | 13.10 | 14.50 |
| 3019   | <i>Adnp<sup>+/+</sup></i> | Saline/DD | 1.70        | 2.08 | 2.45 | 3.00 | 3.46 | 3.70 | 4.05 | 4.50 | 5.01 | 5.19 | 5.91 | 6.18 | 6.40 | 6.88  | 7.17  | 7.54  | 8.24  | 9.01  | 9.50  | 10.38 | 11.11 | 12.20 |
| 3020   | <i>Adnp<sup>+/+</sup></i> | Saline/DD | 1.80        | 2.06 | 2.50 | 3.11 | 3.53 | 3.88 | 4.44 | 4.53 | 4.91 | 5.77 | 6.04 | 6.65 | 6.79 | 7.07  | 7.67  | 7.90  | 8.41  | 9.33  | 10.04 | 10.63 | 11.62 | 12.44 |
| 3021   | <i>Adnp<sup>+/+</sup></i> | Saline/DD | 1.80        | 2.11 | 2.43 | 2.45 | 3.64 | 3.74 | 4.26 | 5.10 | 5.50 | 6.28 | 6.32 | 6.81 | 7.07 | 7.31  | 7.31  | 7.62  | 8.28  | 8.84  | 9.71  | 9.96  | 11.03 | 12.09 |
| 7S1    | <i>Adnp<sup>+/+</sup></i> | Saline/DD | 2.10        | 2.68 | 3.24 | 3.69 | 4.35 | 4.97 | 5.52 | 6.13 | 6.63 | 7.32 | 8.02 | 8.49 | 9.25 | 9.94  | 10.51 | 10.70 | 11.45 | 12.17 | 13.05 | 13.06 | 14.60 | 15.80 |
| 7S2    | <i>Adnp<sup>+/+</sup></i> | Saline/DD | 2.01        | 2.66 | 3.12 | 3.74 | 4.19 | 4.76 | 5.61 | 6.08 | 6.66 | 7.42 | 8.09 | 8.51 | 9.22 | 10.15 | 10.74 | 10.85 | 12.00 | 12.40 | 13.12 | 14.11 | 14.53 | 15.82 |
| 8S1    | <i>Adnp<sup>+/+</sup></i> | Saline/DD | 1.91        | 2.22 | 2.69 | 3.18 | 3.81 | 4.56 | 5.12 | 5.90 | 6.15 | 6.65 | 7.00 | 7.71 | 8.06 | 8.46  | 8.90  | 9.21  | 9.74  | 10.31 | 11.20 | 12.51 | 13.50 | 14.38 |
| 9S5    | <i>Adnp<sup>+/+</sup></i> | Saline/DD |             | 2.26 | 2.68 | 3.14 | 3.64 | 4.16 | 4.61 | 4.91 | 5.46 | 6.15 | 6.93 | 7.11 | 7.42 | 7.81  | 8.08  | 8.44  | 8.76  | 9.31  | 9.84  | 10.63 | 11.97 | 12.83 |
| 11S3   | <i>Adnp<sup>+/+</sup></i> | Saline/DD |             | 1.96 | 2.34 | 2.82 | 3.29 | 3.72 | 4.13 | 4.60 | 5.11 | 5.50 | 6.12 | 6.69 | 7.14 | 7.57  | 7.90  | 8.24  | 8.86  | 9.36  | 9.93  | 10.72 |       |       |
| 12S1   | <i>Adnp<sup>+/+</sup></i> | Saline/DD |             | 2.40 | 2.71 | 3.21 | 3.77 | 4.39 | 5.13 | 6.07 | 6.69 | 7.69 | 8.13 | 8.69 | 9.00 | 9.57  | 10.10 | 10.85 | 10.72 | 11.34 | 12.21 | 13.44 | 14.09 |       |
| 12S2   | <i>Adnp<sup>+/+</sup></i> | Saline/DD |             | 2.37 | 2.81 | 3.27 | 3.76 | 4.41 | 5.14 | 5.82 | 6.65 | 7.44 | 8.07 | 8.88 | 9.57 | 10.17 | 11.08 | 10.65 | 11.77 | 12.10 | 13.14 | 14.17 | 14.62 |       |
| 2963   | <i>Adnp<sup>+/+</sup></i> | Saline/DD | 1.84        | 2.22 | 2.60 | 3.10 | 3.80 | 4.30 | 4.70 | 5.40 | 6.10 | 6.60 | 6.80 | 7.40 | 7.90 | 8.40  | 8.60  | 9.00  | 9.50  | 10.00 | 10.90 | 11.50 | 12.10 | 13.25 |
| 2968   | <i>Adnp<sup>+/+</sup></i> | Saline/DD | 1.78        | 2.22 | 2.60 | 3.00 | 3.60 | 4.10 | 4.90 | 5.40 | 6.00 | 6.50 | 7.00 | 7.60 | 7.80 | 8.30  | 8.50  | 9.10  | 9.40  | 9.80  | 10.70 | 11.50 | 11.90 | 12.89 |
| 2981   | <i>Adnp<sup>+/+</sup></i> | Saline/DD | 1.80        | 2.10 | 2.40 | 2.90 | 3.10 | 3.60 | 4.20 | 4.80 | 5.00 | 4.90 | 5.20 | 5.70 | 6.10 | 6.00  | 6.30  | 6.30  | 6.60  | 6.70  | 7.30  | 7.60  | 9.20  | 10.03 |
| 2977   | <i>Adnp<sup>+/+</sup></i> | Saline/DD | 1.97        | 2.20 | 2.60 | 2.90 | 3.20 | 3.80 | 3.90 | 4.50 | 4.70 | 5.20 | 5.60 | 6.10 | 6.40 | 6.70  | 6.80  | 6.80  | 7.10  | 7.40  | 7.80  | 8.80  | 10.00 | 11.01 |
| 2990   | <i>Adnp<sup>+/+</sup></i> | Saline/DD | 2.13        | 2.30 | 2.90 | 3.50 | 3.90 | 4.60 | 5.20 | 6.00 | 6.50 | 7.10 | 7.70 | 8.40 | 8.70 | 9.00  | 9.30  | 9.40  | 9.40  | 9.60  | 10.70 | 11.70 | 13.20 | 14.31 |
| 3001   | <i>Adnp<sup>+/+</sup></i> | Saline/DD | 1.70        | 1.90 | 2.10 | 2.70 | 3.20 | 3.80 | 4.40 | 5.00 | 5.40 | 6.10 | 6.90 | 7.10 | 7.70 | 8.10  | 8.90  | 9.20  | 9.40  | 9.70  | 10.40 | 11.10 | 12.50 | 13.32 |
| 3002   | <i>Adnp<sup>+/+</sup></i> | Saline/DD | 1.76        | 1.90 | 2.20 | 2.60 | 3.00 | 3.80 | 4.30 | 5.00 | 5.50 | 6.20 | 6.60 | 7.50 | 8.00 | 8.30  | 9.00  | 9.20  | 9.50  | 9.70  | 10.20 | 11.20 | 12.30 | 13.38 |
| 3055   | <i>Adnp<sup>+/+</sup></i> | Saline/DD | 1.61        | 1.79 | 2.02 | 2.51 | 2.97 | 3.16 | 3.72 | 4.24 | 4.42 | 4.70 | 5.21 | 5.59 | 5.81 | 6.03  | 6.27  | 6.67  | 7.02  | 7.57  | 8.09  | 9.11  | 9.77  | 10.59 |
| 3066   | <i>Adnp<sup>+/+</sup></i> | Saline/DD | 1.75        | 2.06 | 2.48 | 2.95 | 3.56 | 4.03 | 4.88 | 5.39 | 5.60 | 6.05 | 6.74 | 7.08 | 7.23 | 7.93  | 7.86  | 8.09  | 8.73  | 9.15  | 10.00 | 10.39 | 11.57 | 12.13 |
| 3070   | <i>Adnp<sup>+/+</sup></i> | Saline/DD | 1.59        | 1.76 | 2.26 | 2.78 | 3.10 | 3.67 | 4.09 | 4.58 | 5.03 | 5.55 | 6.10 | 6.57 | 6.69 | 7.28  | 7.65  | 7.61  | 7.86  | 8.28  | 8.65  | 8.53  | 8.98  | 9.57  |

| Weight (gr) |                            |           |      |      |      |      |      |      |      |      |      |      |      |      |      |      |       |       |       |       |       |       |       |       |
|-------------|----------------------------|-----------|------|------|------|------|------|------|------|------|------|------|------|------|------|------|-------|-------|-------|-------|-------|-------|-------|-------|
| Number      | Genotype                   | Treatment | 0    | 1    | 2    | 3    | 4    | 5    | 6    | 7    | 8    | 9    | 10   | 11   | 12   | 13   | 14    | 15    | 16    | 17    | 18    | 19    | 20    | 21    |
| 3071        | <i>Adnp</i> <sup>+/+</sup> | Saline/DD | 1.71 | 1.89 | 2.41 | 2.86 | 3.10 | 3.54 | 4.25 | 4.62 | 5.05 | 5.60 | 6.08 | 6.53 | 6.71 | 6.99 | 7.46  | 7.74  | 7.65  | 7.76  | 7.94  | 8.11  | 8.75  | 9.26  |
| 8S2         | <i>Adnp</i> <sup>+/+</sup> | Saline/DD | 1.93 | 2.32 | 2.77 | 3.24 | 3.98 | 4.71 | 5.25 | 5.90 | 6.60 | 6.83 | 7.09 | 7.54 | 8.06 | 8.38 | 8.92  | 9.43  | 9.75  | 10.33 | 11.16 | 12.44 | 12.92 | 13.63 |
| 8S3         | <i>Adnp</i> <sup>+/+</sup> | Saline/DD | 1.86 | 2.15 | 2.61 | 3.04 | 3.56 | 4.34 | 4.82 | 5.51 | 6.37 | 6.47 | 6.93 | 7.60 | 8.12 | 8.31 | 9.06  | 9.39  | 9.88  | 10.17 | 11.48 | 12.28 | 12.84 | 13.49 |
| 9S1         | <i>Adnp</i> <sup>+/+</sup> | Saline/DD |      | 2.17 | 2.33 | 2.98 | 3.37 | 3.85 | 4.23 | 4.77 | 5.30 | 6.02 | 6.59 | 7.04 | 7.19 | 7.68 | 7.87  | 8.34  | 8.40  | 9.07  | 10.20 | 10.87 | 12.03 | 13.02 |
| 10S1        | <i>Adnp</i> <sup>+/+</sup> | Saline/DD | 1.94 | 2.23 | 2.63 | 3.03 | 3.43 | 4.08 | 4.30 | 4.92 | 5.36 | 5.56 | 6.31 | 6.41 | 7.01 | 7.71 | 7.50  | 7.68  | 8.33  | 8.82  | 9.50  | 10.48 | 11.25 | 11.95 |
| 10S2        | <i>Adnp</i> <sup>+/+</sup> | Saline/DD | 1.59 | 2.06 | 2.32 | 2.82 | 3.32 | 3.74 | 4.07 | 4.56 | 4.79 | 5.40 | 5.53 | 6.13 | 6.75 | 7.13 | 6.90  | 7.03  | 7.22  | 7.71  | 8.15  | 8.61  | 9.84  | 10.52 |
| 10S6        | <i>Adnp</i> <sup>+/+</sup> | Saline/DD | 1.82 | 2.07 | 2.36 | 2.91 | 3.49 | 3.77 | 4.48 | 5.00 | 5.24 | 5.75 | 6.01 | 6.40 | 6.95 | 7.42 | 7.47  | 7.98  | 8.11  | 8.75  | 9.20  | 10.39 | 10.83 | 11.67 |
| 11S1        | <i>Adnp</i> <sup>+/+</sup> | Saline/DD |      | 1.83 | 2.14 | 2.37 | 2.92 | 3.14 | 3.64 | 4.13 | 4.47 | 4.92 | 5.46 | 6.16 | 6.59 | 6.94 | 7.32  | 7.71  | 8.15  | 8.66  | 9.29  | 9.40  |       |       |
| 11S4        | <i>Adnp</i> <sup>+/+</sup> | Saline/DD |      | 2.05 | 2.28 | 2.74 | 3.28 | 3.77 | 4.21 | 5.01 | 5.31 | 5.85 | 6.48 | 7.17 | 7.55 | 8.12 | 8.58  | 9.12  | 9.33  | 9.90  | 10.36 | 10.91 |       |       |
| 12S3        | <i>Adnp</i> <sup>+/+</sup> | Saline/DD |      | 2.29 | 2.67 | 3.20 | 3.76 | 4.41 | 5.08 | 5.98 | 6.59 | 7.20 | 7.92 | 8.46 | 9.49 | 9.76 | 10.44 | 10.53 | 11.13 | 11.79 | 12.49 | 13.51 | 14.50 |       |
| 2970        | <i>Adnp</i> <sup>+/-</sup> | Saline/DD | 1.70 | 1.97 | 2.30 | 2.70 | 3.20 | 3.70 | 4.40 | 4.60 | 5.40 | 5.60 | 6.10 | 6.10 | 6.60 | 6.60 | 6.90  | 6.90  | 7.50  | 7.50  | 8.40  | 9.40  | 10.30 | 11.48 |
| 2969        | <i>Adnp</i> <sup>+/-</sup> | Saline/DD | 1.64 | 1.94 | 2.20 | 2.60 | 3.30 | 3.70 | 4.10 | 4.70 | 4.90 | 5.00 | 5.50 | 5.80 | 6.50 | 6.80 | 7.60  | 7.80  | 8.10  | 8.00  | 8.40  | 9.30  | 9.60  | 10.97 |
| 2985        | <i>Adnp</i> <sup>+/-</sup> | Saline/DD | 1.92 | 2.10 | 2.50 | 2.80 | 3.20 | 3.70 | 4.40 | 5.00 | 5.10 | 5.30 | 5.70 | 6.00 | 6.40 | 6.30 | 6.30  | 6.50  | 6.90  | 7.00  | 7.30  | 7.50  | 8.70  | 9.60  |
| 3004        | <i>Adnp</i> <sup>+/-</sup> | Saline/DD | 1.50 | 1.70 | 2.00 | 2.50 | 2.90 | 3.50 | 4.00 | 4.80 | 5.10 | 5.80 | 6.20 | 6.70 | 7.30 | 7.80 | 8.20  | 8.60  | 8.90  | 8.70  | 9.00  | 9.90  | 11.00 | 12.00 |
| 3056        | <i>Adnp</i> <sup>+/-</sup> | Saline/DD | 1.70 | 2.04 | 2.40 | 2.86 | 3.37 | 3.58 | 4.36 | 4.53 | 5.24 | 5.43 | 5.64 | 6.24 | 6.80 | 7.24 | 7.43  | 7.77  | 8.29  | 8.72  | 9.78  | 10.62 | 11.57 | 12.32 |
| 3069        | <i>Adnp</i> <sup>+/-</sup> | Saline/DD | 1.64 | 1.85 | 2.57 | 2.69 | 3.11 | 3.49 | 4.03 | 4.37 | 4.87 | 5.36 | 5.48 | 6.09 | 6.43 | 6.87 | 6.82  | 6.86  | 7.43  | 8.01  | 8.48  | 8.53  | 9.45  | 10.30 |
| 8S4         | <i>Adnp</i> <sup>+/-</sup> | Saline/DD | 1.81 | 2.23 | 2.80 | 3.32 | 3.88 | 4.54 | 5.04 | 5.76 | 6.38 | 7.09 | 7.79 | 8.02 | 8.33 | 8.74 | 8.78  | 9.18  | 9.54  | 10.56 | 11.07 | 12.13 | 12.60 | 13.37 |
| 9S2         | <i>Adnp</i> <sup>+/-</sup> | Saline/DD |      | 1.99 | 2.25 | 2.65 | 3.09 | 3.36 | 3.72 | 4.09 | 4.61 | 5.51 | 5.70 | 6.04 | 6.36 | 6.83 | 7.22  | 7.10  | 7.34  | 7.57  | 8.32  | 9.52  | 10.59 | 11.55 |
| 9S3         | <i>Adnp</i> <sup>+/-</sup> | Saline/DD |      | 2.16 | 2.48 | 2.92 | 3.50 | 3.84 | 4.25 | 4.61 | 5.44 | 6.51 | 6.85 | 7.03 | 7.38 | 7.61 | 8.01  | 8.11  | 8.32  | 8.76  | 9.79  | 11.09 | 12.23 | 13.16 |
| 9S4         | <i>Adnp</i> <sup>+/-</sup> | Saline/DD |      | 2.26 | 2.80 | 3.10 | 3.60 | 4.09 | 4.45 | 4.78 | 5.30 | 6.09 | 6.56 | 6.78 | 7.03 | 7.48 | 7.93  | 7.98  | 8.07  | 8.48  | 8.93  | 9.43  | 10.50 | 11.89 |
| 10S4        | <i>Adnp</i> <sup>+/-</sup> | Saline/DD | 1.50 | 2.07 | 2.36 | 2.82 | 3.26 | 3.71 | 4.18 | 4.63 | 4.72 | 5.40 | 5.64 | 6.21 | 6.85 | 6.55 | 6.95  | 6.80  | 7.45  | 7.84  | 8.35  | 9.03  | 10.02 | 10.99 |
| 11S2        | <i>Adnp</i> <sup>+/-</sup> | Saline/DD |      | 1.97 | 2.34 | 2.70 | 3.20 | 3.56 | 4.00 | 4.52 | 4.86 | 5.24 | 5.75 | 6.43 | 6.89 | 7.41 | 7.57  | 7.73  | 8.19  | 8.74  | 9.28  | 10.28 |       |       |
| 2974        | <i>Adnp</i> <sup>+/-</sup> | Saline/DD | 1.77 | 2.00 | 2.30 | 2.60 | 3.00 | 3.50 | 3.70 | 4.60 | 4.90 | 5.20 | 5.70 | 5.50 | 5.80 | 6.20 | 6.00  | 6.30  | 6.50  | 6.60  | 7.00  | 7.20  | 8.00  | 8.64  |
| 3023        | <i>Adnp</i> <sup>+/-</sup> | Saline/DD | 1.40 | 1.64 | 1.84 | 1.97 | 2.61 | 2.69 | 3.15 | 3.97 | 4.43 | 4.64 | 4.75 | 5.17 | 5.31 | 5.42 | 5.90  | 6.30  | 6.60  | 7.08  | 7.45  | 7.93  | 8.55  | 9.37  |
| 3024        | <i>Adnp</i> <sup>+/-</sup> | Saline/DD | 1.40 | 1.55 | 1.76 | 2.08 | 2.09 | 2.25 | 2.79 | 2.98 | 3.19 | 3.57 | 3.96 | 4.15 | 4.22 | 4.30 | 4.51  | 4.75  | 5.18  | 5.53  | 6.08  | 6.47  | 7.13  | 7.91  |
| 3074        | <i>Adnp</i> <sup>+/-</sup> | Saline/DD | 1.54 | 1.77 | 2.11 | 2.52 | 2.75 | 3.28 | 3.90 | 4.18 | 4.47 | 4.97 | 5.24 | 6.26 | 6.49 | 6.49 | 6.85  | 6.63  | 6.80  | 7.39  | 7.49  | 7.99  | 8.10  | 8.72  |
| 3146        | <i>Adnp</i> <sup>+/-</sup> | Saline/DD | 1.54 | 1.81 | 2.02 | 2.31 | 2.53 | 3.18 | 3.59 | 3.98 | 4.35 | 4.42 | 4.68 | 5.32 | 6.05 | 6.42 | 6.66  | 6.95  | 7.14  | 7.46  | 7.87  | 8.12  | 9.05  | 9.60  |
| 8S5         | <i>Adnp</i> <sup>+/-</sup> | Saline/DD | 1.62 | 1.90 | 2.25 | 2.63 | 2.85 | 3.53 | 3.95 | 4.55 | 4.71 | 5.07 | 5.41 | 6.08 | 6.49 | 6.67 | 7.08  | 7.37  | 7.89  | 8.22  | 9.16  | 10.02 | 10.46 | 11.45 |
| 10S3        | <i>Adnp</i> <sup>+/-</sup> | Saline/DD | 1.70 | 1.95 | 2.19 | 2.73 | 2.90 | 3.24 | 3.58 | 4.17 | 4.29 | 4.92 | 4.85 | 5.30 | 5.44 | 6.17 | 5.83  | 6.22  | 6.31  | 6.61  | 7.33  | 7.57  | 8.44  | 9.32  |
| 10S5        | <i>Adnp</i> <sup>+/-</sup> | Saline/DD | 1.59 | 1.36 | 1.46 | 1.82 | 1.97 | 2.15 | 2.40 | 2.69 | 3.23 | 3.60 | 3.80 | 4.41 | 4.55 | 4.72 | 5.08  | 5.03  | 5.19  | 5.37  | 5.55  | 5.82  | 6.00  | 7.02  |



| Weight (gr) |                            |           |      |      |      |      |      |      |      |      |      |      |      |      |      |      |       |       |       |       |       |       |       |       |
|-------------|----------------------------|-----------|------|------|------|------|------|------|------|------|------|------|------|------|------|------|-------|-------|-------|-------|-------|-------|-------|-------|
| Number      | Genotype                   | Treatment | 0    | 1    | 2    | 3    | 4    | 5    | 6    | 7    | 8    | 9    | 10   | 11   | 12   | 13   | 14    | 15    | 16    | 17    | 18    | 19    | 20    | 21    |
| 12S4        | <i>Adnp</i> <sup>+/-</sup> | Saline/DD |      | 2.06 | 2.56 | 2.99 | 3.40 | 4.14 | 4.84 | 5.65 | 6.47 | 7.17 | 8.22 | 8.80 | 9.42 | 9.74 | 11.09 | 11.06 | 11.60 | 11.86 | 12.68 | 13.35 | 14.46 |       |
| 2971        | <i>Adnp</i> <sup>+/+</sup> | NAP       | 1.80 | 2.20 | 2.60 | 3.00 | 3.50 | 4.20 | 4.60 | 5.10 | 5.60 | 5.90 | 6.40 | 6.80 | 7.20 | 7.70 | 7.80  | 8.20  | 8.60  | 9.10  | 10.10 | 10.80 | 11.60 | 12.90 |
| 2972        | <i>Adnp</i> <sup>+/+</sup> | NAP       | 1.90 | 2.57 | 2.60 | 2.90 | 3.50 | 4.10 | 4.80 | 5.30 | 6.00 | 6.40 | 6.80 | 7.20 | 7.50 | 7.70 | 8.20  | 8.50  | 9.30  | 9.50  | 10.70 | 11.40 | 12.30 | 13.73 |
| 2986        | <i>Adnp</i> <sup>+/+</sup> | NAP       | 1.81 | 2.00 | 2.40 | 2.70 | 3.00 | 3.60 | 3.90 | 4.70 | 5.10 | 5.70 | 6.00 | 6.10 | 6.10 | 6.30 | 6.50  | 6.80  | 7.10  | 7.30  | 7.70  | 8.10  | 9.24  | 9.95  |
| 3005        | <i>Adnp</i> <sup>+/+</sup> | NAP       | 1.72 | 2.00 | 2.20 | 2.80 | 3.20 | 3.90 | 4.40 | 5.10 | 5.50 | 6.40 | 7.10 | 7.50 | 8.10 | 8.50 | 9.30  | 9.40  | 10.00 | 10.00 | 10.80 | 11.70 | 12.80 | 14.36 |
| 3053        | <i>Adnp</i> <sup>+/+</sup> | NAP       | 1.70 | 1.96 | 2.38 | 2.86 | 3.57 | 3.91 | 4.49 | 4.88 | 5.33 | 5.75 | 6.52 | 7.01 | 7.31 | 7.93 | 8.22  | 8.40  | 8.90  | 10.09 | 10.82 | 11.57 | 12.50 | 13.46 |
| 3073        | <i>Adnp</i> <sup>+/+</sup> | NAP       | 1.71 | 2.01 | 2.43 | 2.93 | 3.22 | 3.81 | 4.29 | 4.70 | 5.40 | 6.07 | 6.77 | 7.25 | 7.39 | 7.84 | 8.02  | 8.24  | 9.34  | 9.53  | 10.46 | 11.13 | 12.04 | 12.70 |
| 3147        | <i>Adnp</i> <sup>+/+</sup> | NAP       | 1.77 | 2.05 | 2.50 | 3.13 | 3.41 | 3.91 | 4.52 | 4.81 | 5.30 | 6.20 | 6.57 | 7.00 | 7.24 | 7.98 | 8.21  | 8.67  | 9.03  | 9.66  | 10.64 | 11.08 | 12.13 | 13.01 |
| 7N1         | <i>Adnp</i> <sup>+/+</sup> | NAP       | 1.32 | 1.72 | 2.18 | 2.73 | 3.17 | 3.87 | 4.56 | 5.01 | 5.71 | 6.56 | 7.32 | 7.59 | 8.44 | 9.19 | 9.76  | 10.25 | 10.96 | 11.89 | 12.43 | 13.04 | 13.49 | 14.72 |
| 7N3         | <i>Adnp</i> <sup>+/+</sup> | NAP       | 1.92 | 2.41 | 2.96 | 3.48 | 4.13 | 4.63 | 5.06 | 5.88 | 6.52 | 7.14 | 7.68 | 8.26 | 9.00 | 9.78 | 10.13 | 10.52 | 11.43 | 12.07 | 12.32 | 12.99 | 13.56 | 14.67 |
| 8N3         | <i>Adnp</i> <sup>+/+</sup> | NAP       | 1.97 | 2.34 | 2.76 | 3.20 | 3.80 | 4.50 | 5.12 | 5.77 | 6.41 | 6.54 | 6.81 | 7.65 | 8.16 | 8.43 | 8.91  | 9.16  | 9.56  |       | 11.12 | 11.78 | 12.52 | 13.18 |
| 9N3         | <i>Adnp</i> <sup>+/+</sup> | NAP       |      | 2.34 | 2.78 | 3.20 | 3.43 | 3.93 | 4.41 | 4.85 | 5.30 | 6.15 | 6.73 | 7.01 | 7.25 | 7.71 | 7.96  | 8.15  | 8.49  | 9.21  | 10.22 | 11.49 | 12.54 | 13.68 |
| 9N4         | <i>Adnp</i> <sup>+/+</sup> | NAP       |      | 2.18 | 2.60 | 3.05 | 3.46 | 3.84 | 4.31 | 4.74 | 5.22 | 6.01 | 6.30 | 6.62 | 6.91 | 7.25 | 7.75  | 8.15  | 8.48  | 8.76  | 9.90  | 11.14 | 11.89 | 12.85 |
| 10N1        | <i>Adnp</i> <sup>+/+</sup> | NAP       | 1.80 | 2.29 | 2.56 | 3.09 | 3.51 | 3.88 | 4.32 | 4.95 | 5.82 | 6.14 | 6.85 | 6.70 | 6.98 | 7.84 | 8.02  | 7.61  | 8.21  | 8.08  | 8.74  | 9.46  | 10.15 | 11.27 |
| 11N5        | <i>Adnp</i> <sup>+/+</sup> | NAP       |      | 2.10 | 2.41 | 2.91 | 3.41 | 3.83 | 4.21 | 4.84 | 5.11 | 5.57 | 6.07 | 6.71 | 7.17 | 7.67 | 8.03  | 8.32  | 9.21  | 9.67  | 10.33 | 10.73 |       |       |
| 2966        | <i>Adnp</i> <sup>+/+</sup> | NAP       | 1.38 | 1.68 | 2.00 | 2.30 | 2.80 | 3.20 | 3.90 | 4.20 | 4.50 | 5.00 | 5.60 | 5.90 | 6.30 | 6.50 | 7.10  | 7.20  | 7.60  | 7.70  | 8.40  | 8.80  | 9.50  | 10.44 |
| 2975        | <i>Adnp</i> <sup>+/+</sup> | NAP       | 1.89 | 2.10 | 2.50 | 2.90 | 3.30 | 3.80 | 4.30 | 4.70 | 5.30 | 6.20 | 6.40 | 7.00 | 7.50 | 7.60 | 7.90  | 8.30  | 8.40  | 8.60  | 8.90  | 10.20 | 11.40 | 12.20 |
| 2980        | <i>Adnp</i> <sup>+/+</sup> | NAP       | 1.97 | 2.10 | 2.50 | 2.90 | 3.30 | 4.00 | 4.40 | 5.00 | 5.40 | 6.20 | 6.30 | 6.30 | 7.00 | 6.90 | 7.30  | 7.50  | 7.80  | 8.00  | 8.20  | 8.70  | 10.20 | 10.70 |
| 2991        | <i>Adnp</i> <sup>+/+</sup> | NAP       | 1.92 | 2.20 | 2.70 | 3.30 | 3.80 | 4.60 | 5.10 | 5.90 | 6.30 | 6.90 | 7.40 | 7.90 | 8.30 | 8.40 | 8.70  | 9.00  | 8.90  | 9.20  | 10.40 | 11.30 | 12.60 | 13.60 |
| 2988        | <i>Adnp</i> <sup>+/+</sup> | NAP       | 2.05 | 2.30 | 2.70 | 3.30 | 3.90 | 4.60 | 5.00 | 5.70 | 6.30 | 7.00 | 7.40 | 7.90 | 8.50 | 8.90 | 9.10  | 9.20  | 9.20  | 9.00  | 10.60 | 11.50 | 12.66 | 13.76 |
| 2999        | <i>Adnp</i> <sup>+/+</sup> | NAP       | 1.63 | 1.90 | 2.20 | 2.70 | 3.30 | 3.90 | 4.40 | 5.20 | 5.50 | 6.30 | 7.10 | 7.60 | 8.10 | 8.40 | 9.10  | 9.30  | 9.50  | 9.70  | 10.80 | 11.60 | 12.60 | 13.69 |
| 3018        | <i>Adnp</i> <sup>+/+</sup> | NAP       | 1.50 | 1.84 | 2.21 | 2.68 | 3.24 | 3.64 | 4.40 | 4.80 | 5.36 | 5.58 | 6.50 | 6.79 | 7.27 | 7.55 | 7.75  | 8.37  | 8.52  | 9.22  | 10.10 | 10.69 | 11.50 | 11.64 |
| 3025        | <i>Adnp</i> <sup>+/+</sup> | NAP       | 1.60 | 1.92 | 2.20 | 2.90 | 3.14 | 3.55 | 4.15 | 4.59 | 4.72 | 5.29 | 5.50 | 6.15 | 6.65 | 6.95 | 7.27  | 7.58  | 8.02  | 8.34  | 9.45  | 10.10 | 10.85 | 11.63 |
| 3054        | <i>Adnp</i> <sup>+/+</sup> | NAP       | 1.51 | 1.82 | 2.18 | 2.49 | 3.10 | 3.40 | 4.02 | 4.52 | 4.68 | 5.05 | 5.55 | 6.00 | 6.31 | 6.71 | 6.81  | 7.23  | 7.82  | 8.01  | 9.13  | 9.54  | 10.50 | 10.85 |
| 3068        | <i>Adnp</i> <sup>+/+</sup> | NAP       | 1.60 | 1.76 | 2.30 | 2.77 | 3.06 | 3.69 | 4.32 | 4.84 | 5.32 | 6.15 | 6.44 | 6.51 | 6.97 | 7.32 | 7.77  | 8.05  | 7.90  | 8.47  | 8.81  | 9.08  | 9.54  | 10.32 |
| 8N1         | <i>Adnp</i> <sup>+/+</sup> | NAP       | 1.73 | 2.12 | 2.44 | 2.92 | 3.56 | 4.27 | 4.71 | 5.32 | 5.46 | 5.24 | 5.76 | 6.59 | 7.23 | 7.44 | 8.10  | 8.46  | 9.01  | 9.77  | 10.57 | 11.38 | 12.07 | 12.69 |
| 9N5         | <i>Adnp</i> <sup>+/+</sup> | NAP       |      | 2.17 | 2.60 | 2.99 | 3.58 | 3.96 | 4.40 | 4.92 | 5.33 | 6.26 | 6.46 | 6.82 | 7.05 | 7.05 | 7.73  | 8.22  | 8.32  | 8.59  | 9.20  | 10.40 | 11.26 | 11.76 |
| 10N6        | <i>Adnp</i> <sup>+/+</sup> | NAP       | 1.62 | 1.97 | 2.20 | 2.70 | 3.01 | 3.40 | 3.64 | 4.37 | 5.28 | 5.60 | 6.10 | 6.22 | 6.48 | 7.15 | 7.29  | 7.48  | 7.85  | 8.02  | 8.45  | 8.93  | 9.98  | 10.96 |
| 11N1        | <i>Adnp</i> <sup>+/+</sup> | NAP       |      | 2.07 | 2.28 | 2.80 | 3.22 | 3.74 | 4.43 | 4.94 | 5.28 | 5.72 | 6.27 | 6.91 | 7.31 | 7.74 | 8.39  | 8.71  | 9.41  | 10.13 | 10.72 | 11.10 |       |       |
| 11N2        | <i>Adnp</i> <sup>+/+</sup> | NAP       |      | 1.93 | 2.14 | 2.52 | 2.92 | 3.43 | 3.77 | 4.20 | 4.59 | 5.16 | 5.70 | 6.32 | 6.74 | 7.26 | 7.55  | 7.97  | 8.18  | 8.66  | 8.58  | 8.57  |       |       |

| Weight (gr) |                            |           |      |      |      |      |      |      |      |      |      |      |      |      |      |       |       |       |       |       |       |       |       |       |
|-------------|----------------------------|-----------|------|------|------|------|------|------|------|------|------|------|------|------|------|-------|-------|-------|-------|-------|-------|-------|-------|-------|
| Number      | Genotype                   | Treatment | 0    | 1    | 2    | 3    | 4    | 5    | 6    | 7    | 8    | 9    | 10   | 11   | 12   | 13    | 14    | 15    | 16    | 17    | 18    | 19    | 20    | 21    |
| 12N1        | <i>Adnp</i> <sup>+/+</sup> | NAP       |      | 2.38 | 2.71 | 3.27 | 3.78 | 4.47 | 5.21 | 5.94 | 6.78 | 7.44 | 8.18 | 9.06 | 9.93 | 10.57 | 10.29 | 10.88 | 11.69 | 12.11 | 12.69 | 12.95 | 13.82 |       |
| 12N3        | <i>Adnp</i> <sup>+/+</sup> | NAP       |      | 2.16 | 2.43 | 2.92 | 3.34 | 4.20 | 4.82 | 5.74 | 6.22 | 7.05 | 7.83 | 8.22 | 8.77 | 9.38  | 9.57  | 9.60  | 10.58 | 11.22 | 11.80 | 12.46 | 13.57 |       |
| 2995        | <i>Adnp</i> <sup>+/-</sup> | NAP       | 1.95 | 2.20 | 2.60 | 3.10 | 3.60 | 4.30 | 4.80 | 5.40 | 5.80 | 6.40 | 6.70 | 7.20 | 7.40 | 7.70  | 8.00  | 8.30  | 8.10  | 7.90  | 8.10  | 10.20 | 11.62 | 12.57 |
| 2982        | <i>Adnp</i> <sup>+/-</sup> | NAP       | 1.91 | 2.20 | 2.50 | 2.90 | 3.10 | 3.80 | 4.40 | 4.80 | 5.30 | 5.70 | 6.20 | 6.70 | 6.90 | 7.20  | 7.20  | 7.50  | 7.50  | 7.80  | 8.00  | 8.50  | 9.60  | 10.50 |
| 3017        | <i>Adnp</i> <sup>+/-</sup> | NAP       | 1.60 | 1.98 | 2.22 | 2.72 | 3.17 | 3.39 | 4.06 | 4.70 | 5.18 | 5.54 | 5.71 | 6.27 | 6.66 | 7.19  | 7.35  | 7.44  | 8.04  | 8.28  | 9.24  | 9.85  | 11.26 | 11.97 |
| 3065        | <i>Adnp</i> <sup>+/-</sup> | NAP       | 1.10 | 1.46 | 1.65 | 1.94 | 2.17 | 2.20 | 2.49 | 2.93 | 2.99 | 3.05 | 2.88 | 3.31 | 3.13 | 3.36  | 3.38  | 3.65  | 3.84  | 3.90  | 4.31  | 4.62  | 4.86  | 5.16  |
| 3067        | <i>Adnp</i> <sup>+/-</sup> | NAP       | 1.31 | 1.52 | 1.95 | 2.31 | 2.59 | 3.06 | 3.69 | 4.14 | 4.40 | 5.11 | 5.34 | 5.43 | 5.62 | 6.02  | 5.94  | 6.20  | 6.60  | 7.08  | 7.50  | 7.71  | 8.31  | 9.20  |
| 7N2         | <i>Adnp</i> <sup>+/-</sup> | NAP       | 1.87 | 2.30 | 2.83 | 3.40 | 3.88 | 4.35 | 4.89 | 5.47 | 6.22 | 6.80 | 7.44 | 7.78 | 8.44 | 8.99  | 9.38  | 9.64  | 10.28 | 11.28 | 11.86 | 13.12 | 13.76 | 14.81 |
| 8N4         | <i>Adnp</i> <sup>+/-</sup> | NAP       | 1.76 | 2.15 | 2.65 | 3.08 | 3.65 | 4.11 | 4.57 | 5.00 | 5.02 | 5.59 | 5.84 | 6.55 | 7.00 | 6.95  | 7.55  | 8.05  | 8.39  | 10.08 | 9.83  | 11.08 | 11.93 | 12.56 |
| 8N5         | <i>Adnp</i> <sup>+/-</sup> | NAP       | 1.69 | 2.08 | 2.52 | 2.96 | 3.44 | 4.12 | 4.53 | 5.04 | 5.64 | 6.31 | 6.48 | 7.07 | 7.45 | 7.64  | 7.72  | 8.17  | 8.77  | 9.12  | 10.12 | 11.11 | 11.99 | 12.45 |
| 9N2         | <i>Adnp</i> <sup>+/-</sup> | NAP       |      | 2.15 | 2.63 | 2.95 | 3.53 | 3.90 | 4.37 | 4.66 | 5.06 | 5.67 | 6.15 | 6.48 | 6.70 | 6.92  | 7.36  | 7.57  | 7.82  | 8.71  | 9.73  | 11.00 | 11.95 | 13.18 |
| 10N4        | <i>Adnp</i> <sup>+/-</sup> | NAP       | 1.60 | 1.78 | 2.04 | 2.49 | 2.90 | 3.23 | 3.88 | 4.44 | 4.26 | 4.82 | 5.03 | 5.44 | 6.00 | 6.42  | 6.26  | 6.60  | 6.72  | 7.30  | 7.64  | 8.23  | 8.56  | 8.79  |
| 12N4        | <i>Adnp</i> <sup>+/-</sup> | NAP       |      | 2.29 | 2.63 | 3.04 | 3.62 | 4.21 | 4.88 | 5.71 | 6.43 | 7.11 | 7.62 | 7.88 | 8.48 | 9.08  | 9.55  | 9.68  | 10.22 | 11.01 | 11.54 | 12.04 | 13.28 |       |
| 12N5        | <i>Adnp</i> <sup>+/-</sup> | NAP       |      | 2.05 | 2.48 | 2.95 | 3.37 | 4.11 | 4.61 | 5.44 | 6.31 | 6.73 | 7.26 | 7.82 | 8.10 | 8.81  | 9.03  | 8.76  | 9.65  | 10.01 | 10.67 | 11.65 | 12.70 |       |
| 2964        | <i>Adnp</i> <sup>+/-</sup> | NAP       | 1.52 | 1.92 | 2.20 | 2.60 | 3.30 | 3.60 | 4.10 | 4.50 | 5.20 | 5.40 | 5.90 | 6.00 | 6.60 | 6.80  | 7.30  | 7.40  | 7.50  | 7.70  | 8.20  | 9.00  | 9.60  | 10.73 |
| 2965        | <i>Adnp</i> <sup>+/-</sup> | NAP       | 1.46 | 1.74 | 1.90 | 2.30 | 2.80 | 3.30 | 3.60 | 4.10 | 4.40 | 5.00 | 5.60 | 5.60 | 5.90 | 6.20  | 6.60  | 7.10  | 7.20  | 7.40  | 8.10  | 8.90  | 9.40  | 10.59 |
| 2967        | <i>Adnp</i> <sup>+/-</sup> | NAP       | 1.64 | 2.02 | 2.40 | 2.80 | 3.30 | 3.70 | 4.20 | 4.50 | 5.00 | 5.30 | 5.90 | 6.20 | 6.50 | 6.70  | 7.00  | 7.40  | 7.60  | 7.80  | 8.60  | 9.30  | 9.90  | 10.58 |
| 2976        | <i>Adnp</i> <sup>+/-</sup> | NAP       | 1.64 | 1.80 | 2.10 | 2.40 | 2.60 | 3.10 | 3.50 | 4.00 | 4.20 | 5.00 | 5.20 | 5.30 | 5.30 | 5.30  | 5.40  | 5.70  | 5.90  | 5.90  | 6.00  | 6.20  | 7.00  | 7.36  |
| 2978        | <i>Adnp</i> <sup>+/-</sup> | NAP       | 1.66 | 1.90 | 2.20 | 2.60 | 2.90 | 3.50 | 3.80 | 4.60 | 4.70 | 5.60 | 5.70 | 6.30 | 6.00 | 6.00  | 6.20  | 6.70  | 6.90  | 7.30  | 7.60  | 8.20  | 9.40  | 10.07 |
| 2979        | <i>Adnp</i> <sup>+/-</sup> | NAP       | 1.65 | 1.80 | 2.10 | 2.50 | 2.70 | 3.30 | 3.60 | 4.20 | 4.60 | 4.90 | 5.00 | 5.20 | 5.70 | 5.30  | 5.50  | 5.70  | 5.90  | 5.90  | 6.40  | 6.50  | 7.56  | 7.76  |
| 2989        | <i>Adnp</i> <sup>+/-</sup> | NAP       | 1.76 | 1.90 | 2.40 | 2.90 | 3.40 | 4.00 | 4.40 | 5.20 | 5.60 | 6.30 | 6.60 | 7.20 | 7.40 | 7.80  | 8.10  | 8.50  | 8.10  | 8.40  | 9.20  | 10.10 | 11.20 | 12.40 |
| 2987        | <i>Adnp</i> <sup>+/-</sup> | NAP       | 1.74 | 2.00 | 2.40 | 3.00 | 3.50 | 4.30 | 4.70 | 5.40 | 5.80 | 6.40 | 6.70 | 7.30 | 7.80 | 8.40  | 8.50  | 8.70  | 8.60  | 8.50  | 9.60  | 10.50 | 11.60 | 12.86 |
| 2998        | <i>Adnp</i> <sup>+/-</sup> | NAP       | 1.47 | 1.70 | 1.90 | 2.40 | 2.90 | 3.50 | 3.90 | 4.60 | 5.00 | 5.80 | 6.10 | 6.60 | 7.00 | 7.30  | 8.20  | 8.40  | 8.70  | 8.80  | 9.40  | 10.30 | 11.20 | 12.46 |
| 3000        | <i>Adnp</i> <sup>+/-</sup> | NAP       | 1.50 | 1.70 | 1.90 | 2.40 | 2.70 | 3.50 | 4.00 | 4.60 | 5.10 | 5.70 | 6.10 | 6.90 | 7.30 | 7.80  | 8.40  | 8.60  | 8.80  | 8.90  | 9.80  | 10.50 | 11.63 | 12.57 |
| 2997        | <i>Adnp</i> <sup>+/-</sup> | NAP       | 1.53 | 1.80 | 2.10 | 2.60 | 3.00 | 3.70 | 4.20 | 5.00 | 5.30 | 5.90 | 6.40 | 6.90 | 7.50 | 7.80  | 8.40  | 8.70  | 8.90  | 8.90  | 9.60  | 10.40 | 11.30 | 12.22 |
| 3057        | <i>Adnp</i> <sup>+/-</sup> | NAP       | 1.60 | 1.57 | 1.84 | 2.26 | 2.54 | 2.65 | 3.42 | 3.62 | 3.84 | 4.24 | 4.50 | 4.87 | 5.30 | 5.82  | 5.85  | 6.05  | 6.26  | 6.64  | 7.51  | 7.93  | 8.60  | 9.63  |
| 3072        | <i>Adnp</i> <sup>+/-</sup> | NAP       | 1.57 | 1.76 | 2.03 | 2.57 | 2.86 | 3.21 | 3.98 | 4.42 | 4.97 | 5.41 | 5.77 | 5.96 | 6.37 | 6.71  | 6.70  | 7.17  | 7.57  | 8.01  | 8.51  | 8.96  | 9.78  | 10.39 |
| 3075        | <i>Adnp</i> <sup>+/-</sup> | NAP       | 1.38 | 1.53 | 2.03 | 2.36 | 2.56 | 3.15 | 3.67 | 4.23 | 4.45 | 5.13 | 5.81 | 5.86 | 6.15 | 6.33  | 6.32  | 6.43  | 6.80  | 7.06  | 7.78  | 8.00  | 8.80  | 9.43  |
| 3148        | <i>Adnp</i> <sup>+/-</sup> | NAP       | 1.42 | 1.56 | 1.99 | 2.36 | 2.55 | 3.17 | 3.61 | 3.94 | 4.21 | 4.21 | 4.53 | 5.12 | 5.00 | 5.31  | 5.80  | 6.45  | 6.63  | 6.95  | 7.03  | 7.33  | 7.95  | 8.94  |
| 8N2         | <i>Adnp</i> <sup>+/-</sup> | NAP       | 1.86 | 2.24 | 2.72 | 3.14 | 3.66 | 4.36 | 4.79 | 5.50 | 5.59 | 6.23 | 6.34 | 7.12 | 7.52 | 7.74  | 8.09  | 8.48  | 9.00  | 9.34  | 10.10 | 10.83 | 11.46 | 12.17 |

| Weight (gr) |                           |           |      |      |      |      |      |      |      |      |      |      |      |      |      |      |      |      |      |      |      |       |       |       |
|-------------|---------------------------|-----------|------|------|------|------|------|------|------|------|------|------|------|------|------|------|------|------|------|------|------|-------|-------|-------|
| Number      | Genotype                  | Treatment | 0    | 1    | 2    | 3    | 4    | 5    | 6    | 7    | 8    | 9    | 10   | 11   | 12   | 13   | 14   | 15   | 16   | 17   | 18   | 19    | 20    | 21    |
| 9N1         | <i>Adnp<sup>+/-</sup></i> | NAP       |      | 1.83 | 2.30 | 2.62 | 2.86 | 3.21 | 3.61 | 4.09 | 4.59 | 5.25 | 5.74 | 6.15 | 6.43 | 6.93 | 7.03 | 7.26 | 7.57 | 8.36 | 9.13 | 10.42 | 11.34 | 12.52 |
| 10N2        | <i>Adnp<sup>+/-</sup></i> | NAP       | 1.75 | 2.01 | 2.24 | 2.68 | 3.05 | 3.37 | 3.80 | 4.40 | 5.12 | 5.33 | 5.57 | 5.67 | 6.26 | 6.18 | 6.53 | 6.65 | 7.11 | 7.36 | 7.72 | 8.43  | 9.48  | 10.35 |
| 10N3        | <i>Adnp<sup>+/-</sup></i> | NAP       | 1.80 | 1.93 | 2.29 | 2.67 | 3.03 | 3.37 | 3.97 | 4.50 | 4.71 | 4.87 | 4.95 | 5.75 | 5.79 | 6.23 | 6.66 | 6.66 | 6.90 | 7.28 | 7.57 | 7.64  | 8.99  | 9.96  |
| 10N5        | <i>Adnp<sup>+/-</sup></i> | NAP       | 1.75 | 1.89 | 2.12 | 2.53 | 2.77 | 2.56 | 3.59 | 3.80 | 4.39 | 4.98 | 4.98 | 5.24 | 5.43 | 5.94 | 5.82 | 6.10 | 6.39 | 6.61 | 6.90 | 7.13  | 7.12  | 7.45  |
| 11N3        | <i>Adnp<sup>+/-</sup></i> | NAP       |      | 2.03 | 2.34 | 2.67 | 3.17 | 3.60 | 4.06 | 4.62 | 5.10 | 5.26 | 5.76 | 6.30 | 6.57 | 7.09 | 7.56 | 7.83 | 8.29 | 8.58 | 9.04 | 10.00 |       |       |
| 11N4        | <i>Adnp<sup>+/-</sup></i> | NAP       |      | 1.87 | 2.33 | 2.65 | 3.20 | 3.50 | 3.91 | 4.33 | 4.65 | 4.98 | 5.51 | 6.06 | 6.53 | 7.05 | 7.42 | 7.88 | 8.19 | 8.54 | 8.94 | 9.04  |       |       |
| 12N2        | <i>Adnp<sup>+/-</sup></i> | NAP       |      | 1.95 | 2.28 | 2.75 | 3.19 | 3.83 | 4.42 | 5.10 | 5.60 | 6.02 | 6.21 | 6.45 | 6.71 | 6.96 | 7.41 | 7.53 | 8.28 | 8.69 | 9.24 | 9.76  | 10.53 |       |

**Table S26. Raw data for length measurement results.**

| Length (cm) |                           |           |     |     |     |     |     |     |     |     |     |     |     |     |     |     |     |     |     |     |     |     |     |     |
|-------------|---------------------------|-----------|-----|-----|-----|-----|-----|-----|-----|-----|-----|-----|-----|-----|-----|-----|-----|-----|-----|-----|-----|-----|-----|-----|
| Number      | Genotype                  | Treatment | 0   | 1   | 2   | 3   | 4   | 5   | 6   | 7   | 8   | 9   | 10  | 11  | 12  | 13  | 14  | 15  | 16  | 17  | 18  | 19  | 20  | 21  |
| 2973        | <i>Adnp<sup>+/+</sup></i> | Saline/DD | 3.1 | 3.4 | 3.8 | 3.8 | 4.0 | 4.2 | 4.3 | 4.9 | 5.0 | 5.2 | 5.4 | 5.7 | 5.8 | 6.2 | 6.2 | 6.9 | 6.9 | 7.0 | 7.0 | 7.0 | 7.5 | 7.5 |
| 2984        | <i>Adnp<sup>+/+</sup></i> | Saline/DD | 3.1 | 3.3 | 3.7 | 3.8 | 4.0 | 4.0 | 4.5 | 4.6 | 4.7 | 4.8 | 5.4 | 5.4 | 5.5 | 6.0 | 6.2 | 6.2 | 6.5 | 6.5 | 6.5 | 7.0 | 7.0 | 7.0 |
| 2983        | <i>Adnp<sup>+/+</sup></i> | Saline/DD | 3.2 | 3.3 | 3.6 | 3.7 | 4.0 | 4.2 | 4.3 | 4.7 | 4.7 | 4.9 | 5.2 | 5.2 | 5.3 | 5.8 | 5.8 | 5.9 | 6.2 | 6.5 | 6.5 | 6.7 | 6.7 | 6.8 |
| 2996        | <i>Adnp<sup>+/+</sup></i> | Saline/DD | 3.3 | 3.6 | 3.8 | 4.1 | 4.1 | 4.5 | 4.4 | 5.0 | 5.2 | 5.5 | 5.8 | 5.9 | 6.1 | 6.5 | 6.5 | 6.8 | 6.8 | 7.0 | 7.0 | 7.5 | 7.8 | 7.9 |
| 2994        | <i>Adnp<sup>+/+</sup></i> | Saline/DD | 3.1 | 3.5 | 3.7 | 4.1 | 4.1 | 4.5 | 4.6 | 4.8 | 5.0 | 5.4 | 5.4 | 5.8 | 6.1 | 6.1 | 6.5 | 6.5 | 6.5 | 7.0 | 7.0 | 7.3 | 7.3 | 7.8 |
| 2993        | <i>Adnp<sup>+/+</sup></i> | Saline/DD | 3.2 | 3.5 | 3.7 | 4.0 | 4.0 | 4.3 | 4.4 | 4.8 | 5.2 | 5.2 | 5.4 | 5.6 | 6.1 | 6.1 | 6.1 | 6.5 | 6.5 | 6.8 | 7.0 | 7.4 | 7.6 | 8.0 |
| 2992        | <i>Adnp<sup>+/+</sup></i> | Saline/DD | 3.3 | 3.5 | 3.7 | 4.2 | 4.2 | 4.2 | 4.5 | 4.8 | 5.1 | 5.3 | 5.4 | 5.8 | 6.4 | 6.4 | 6.4 | 6.5 | 6.7 | 7.0 | 7.0 | 7.3 | 7.5 | 7.5 |
| 3003        | <i>Adnp<sup>+/+</sup></i> | Saline/DD | 2.9 | 3.2 | 3.6 | 3.7 | 4.0 | 4.2 | 4.6 | 5.0 | 5.0 | 5.3 | 5.4 | 5.8 | 5.8 | 6.0 | 6.5 | 6.5 | 6.9 | 6.9 | 7.0 | 7.5 | 7.5 | 8.0 |
| 3019        | <i>Adnp<sup>+/+</sup></i> | Saline/DD | 3.1 | 3.6 | 3.8 | 4.1 | 4.2 | 4.2 | 4.4 | 4.7 | 4.7 | 4.9 | 5.2 | 5.5 | 5.5 | 5.8 | 6.2 | 6.3 | 6.5 | 6.7 | 7.0 | 7.2 | 7.4 | 7.6 |
| 3020        | <i>Adnp<sup>+/+</sup></i> | Saline/DD | 3.0 | 3.6 | 3.8 | 3.9 | 3.9 | 4.3 | 4.3 | 4.6 | 4.6 | 5.0 | 5.3 | 5.6 | 5.6 | 6.0 | 6.2 | 6.4 | 6.5 | 6.7 | 7.0 | 7.1 | 7.3 | 7.6 |
| 3021        | <i>Adnp<sup>+/+</sup></i> | Saline/DD | 3.3 | 3.3 | 3.6 | 3.8 | 3.9 | 4.2 | 4.4 | 4.7 | 5.0 | 5.2 | 5.3 | 5.5 | 5.5 | 6.0 | 6.2 | 6.5 | 6.7 | 6.9 | 7.2 | 7.2 | 7.5 | 7.7 |
| 7S1         | <i>Adnp<sup>+/+</sup></i> | Saline/DD | 3.4 | 3.6 | 3.9 | 4.1 | 4.1 | 4.5 | 4.6 | 4.8 | 5.2 | 5.5 | 5.7 | 5.8 | 6.0 | 6.2 | 6.5 | 6.9 | 7.1 | 7.3 | 7.5 | 7.5 | 7.5 | 7.8 |
| 7S2         | <i>Adnp<sup>+/+</sup></i> | Saline/DD | 3.3 | 3.6 | 3.9 | 4.1 | 4.1 | 4.4 | 4.6 | 4.8 | 5.1 | 5.4 | 5.7 | 5.7 | 6.0 | 6.3 | 6.6 | 6.8 | 7.0 | 7.2 | 7.4 | 7.4 | 7.6 | 7.7 |
| 8S1         | <i>Adnp<sup>+/+</sup></i> | Saline/DD | 3.3 | 3.5 | 3.5 | 3.8 | 4.0 | 4.3 | 4.5 | 4.7 | 5.0 | 5.0 | 5.3 | 5.6 | 5.8 | 6.1 | 6.4 | 6.6 | 6.9 | 6.9 | 7.2 | 7.2 | 7.5 | 7.8 |
| 9S5         | <i>Adnp<sup>+/+</sup></i> | Saline/DD |     | 3.5 | 3.5 | 3.8 | 4.0 | 4.2 | 4.2 | 4.5 | 4.8 | 5.1 | 5.3 | 5.5 | 5.8 | 5.8 | 6.1 | 6.5 | 6.7 | 6.7 | 7.0 | 7.0 | 7.0 | 7.2 |
| 11S3        | <i>Adnp<sup>+/+</sup></i> | Saline/DD |     | 3.3 | 3.5 | 3.7 | 4.0 | 4.2 | 4.3 | 4.6 | 5.0 | 5.2 | 5.5 | 5.7 | 5.8 | 6.0 | 6.3 | 6.5 | 6.7 | 7.0 | 7.0 | 7.2 |     |     |
| 12S1        | <i>Adnp<sup>+/+</sup></i> | Saline/DD |     | 3.1 | 3.5 | 3.9 | 4.1 | 4.3 | 4.4 | 4.7 | 5.1 | 5.4 | 5.6 | 5.9 | 6.2 | 6.5 | 6.5 | 6.7 | 6.8 | 7.0 | 7.5 | 7.6 | 7.8 |     |
| 12S2        | <i>Adnp<sup>+/+</sup></i> | Saline/DD |     | 3.4 | 3.6 | 3.9 | 4.2 | 4.3 | 4.6 | 5.0 | 5.3 | 5.6 | 5.8 | 6.0 | 6.3 | 6.3 | 6.8 | 7.0 | 7.0 | 7.0 | 7.3 | 7.5 | 7.8 |     |
| 2963        | <i>Adnp<sup>+/+</sup></i> | Saline/DD | 3.2 | 3.5 | 3.7 | 3.7 | 4.1 | 4.2 | 4.2 | 4.4 | 5.0 | 5.0 | 5.3 | 5.3 | 5.6 | 6.0 | 6.2 | 6.4 | 6.5 | 6.5 | 6.8 | 6.8 | 7.4 | 7.4 |
| 2968        | <i>Adnp<sup>+/+</sup></i> | Saline/DD | 3.2 | 3.4 | 3.6 | 3.7 | 4.2 | 4.2 | 4.5 | 4.5 | 5.0 | 5.4 | 5.5 | 5.6 | 5.9 | 6.2 | 6.3 | 6.5 | 6.5 | 6.9 | 7.0 | 7.0 | 7.4 | 7.6 |
| 2981        | <i>Adnp<sup>+/+</sup></i> | Saline/DD | 3.1 | 3.2 | 3.6 | 3.6 | 4.0 | 4.1 | 4.4 | 4.4 | 4.7 | 5.0 | 5.0 | 5.3 | 5.3 | 5.3 | 5.7 | 5.8 | 6.0 | 6.0 | 6.2 | 6.3 | 6.7 | 6.8 |
| 2977        | <i>Adnp<sup>+/+</sup></i> | Saline/DD | 3.1 | 3.3 | 3.6 | 3.9 | 4.1 | 4.3 | 4.3 | 4.5 | 4.7 | 5.0 | 5.0 | 5.3 | 5.5 | 5.5 | 6.2 | 6.2 | 6.2 | 6.5 | 6.5 | 6.8 | 7.0 | 7.0 |
| 2990        | <i>Adnp<sup>+/+</sup></i> | Saline/DD | 3.4 | 3.6 | 3.7 | 4.0 | 4.2 | 4.4 | 4.4 | 5.0 | 5.2 | 5.4 | 5.5 | 5.9 | 6.4 | 6.4 | 6.6 | 6.6 | 6.8 | 6.8 | 7.3 | 7.5 | 7.6 | 7.6 |
| 3001        | <i>Adnp<sup>+/+</sup></i> | Saline/DD | 3.2 | 3.2 | 3.7 | 3.7 | 3.8 | 4.2 | 4.3 | 4.8 | 4.8 | 5.1 | 5.3 | 6.0 | 6.0 | 6.2 | 6.3 | 6.6 | 6.6 | 7.0 | 7.0 | 7.5 | 7.6 | 7.7 |
| 3002        | <i>Adnp<sup>+/+</sup></i> | Saline/DD | 3.0 | 3.3 | 3.5 | 3.7 | 3.8 | 4.2 | 4.5 | 4.6 | 5.0 | 5.0 | 5.4 | 5.7 | 6.1 | 6.4 | 6.7 | 7.0 | 7.0 | 7.3 | 7.3 | 7.3 | 7.5 | 7.5 |
| 3055        | <i>Adnp<sup>+/+</sup></i> | Saline/DD | 2.9 | 3.2 | 3.6 | 4.1 | 4.1 | 4.1 | 4.1 | 4.5 | 4.5 | 4.8 | 5.1 | 5.3 | 5.4 | 5.6 | 6.0 | 6.2 | 6.5 | 6.6 | 6.7 | 6.8 | 7.0 | 7.3 |
| 3066        | <i>Adnp<sup>+/+</sup></i> | Saline/DD | 3.1 | 3.5 | 3.7 | 3.7 | 4.0 | 4.1 | 4.5 | 4.5 | 4.9 | 5.1 | 5.3 | 5.4 | 5.6 | 5.9 | 6.2 | 6.5 | 6.6 | 6.8 | 6.9 | 7.1 | 7.4 | 7.5 |
| 3070        | <i>Adnp<sup>+/+</sup></i> | Saline/DD | 3.2 | 3.3 | 3.5 | 3.5 | 3.9 | 4.0 | 4.2 | 4.3 | 4.6 | 4.9 | 5.2 | 5.2 | 5.5 | 5.8 | 6.0 | 6.2 | 6.5 | 6.6 | 6.9 | 7.1 | 7.3 | 7.3 |

| Length (cm) |                            |           |     |     |     |     |     |     |     |     |     |     |     |     |     |     |     |     |     |     |     |     |     |     |
|-------------|----------------------------|-----------|-----|-----|-----|-----|-----|-----|-----|-----|-----|-----|-----|-----|-----|-----|-----|-----|-----|-----|-----|-----|-----|-----|
| Number      | Genotype                   | Treatment | 0   | 1   | 2   | 3   | 4   | 5   | 6   | 7   | 8   | 9   | 10  | 11  | 12  | 13  | 14  | 15  | 16  | 17  | 18  | 19  | 20  | 21  |
| 3071        | <i>Adnp</i> <sup>+/+</sup> | Saline/DD | 3.1 | 3.5 | 3.5 | 3.5 | 3.9 | 4.1 | 4.3 | 4.5 | 4.8 | 5.1 | 5.2 | 5.3 | 5.5 | 5.9 | 6.2 | 6.3 | 6.6 | 6.6 | 6.8 | 6.9 | 7.0 | 7.0 |
| 8S2         | <i>Adnp</i> <sup>+/+</sup> | Saline/DD | 3.2 | 3.5 | 3.7 | 4.0 | 4.3 | 4.4 | 4.6 | 4.9 | 5.1 | 5.2 | 5.5 | 5.7 | 6.0 | 6.2 | 6.5 | 6.5 | 6.6 | 6.6 | 7.0 | 7.0 | 7.4 | 7.6 |
| 8S3         | <i>Adnp</i> <sup>+/+</sup> | Saline/DD | 3.1 | 3.4 | 3.5 | 3.8 | 4.0 | 4.2 | 4.4 | 4.6 | 4.9 | 5.0 | 5.2 | 5.5 | 5.9 | 6.2 | 6.3 | 6.5 | 6.5 | 6.5 | 6.8 | 7.2 | 7.5 | 7.5 |
| 9S1         | <i>Adnp</i> <sup>+/+</sup> | Saline/DD |     | 3.5 | 3.6 | 3.9 | 4.2 | 4.4 | 4.4 | 4.4 | 4.8 | 5.2 | 5.5 | 5.7 | 6.0 | 6.0 | 6.2 | 6.5 | 6.7 | 6.9 | 7.0 | 7.3 | 7.4 | 7.5 |
| 10S1        | <i>Adnp</i> <sup>+/+</sup> | Saline/DD | 3.3 | 3.5 | 3.7 | 3.9 | 4.0 | 4.2 | 4.5 | 4.6 | 4.7 | 4.9 | 5.0 | 5.2 | 5.5 | 5.7 | 6.0 | 6.2 | 6.5 | 6.5 | 6.7 | 7.0 | 7.1 | 7.3 |
| 10S2        | <i>Adnp</i> <sup>+/+</sup> | Saline/DD | 3.0 | 3.3 | 3.6 | 3.8 | 3.8 | 4.1 | 4.2 | 4.5 | 4.7 | 5.0 | 5.2 | 5.3 | 5.5 | 5.7 | 5.9 | 6.2 | 6.2 | 6.5 | 6.6 | 7.0 | 7.0 | 7.1 |
| 10S6        | <i>Adnp</i> <sup>+/+</sup> | Saline/DD | 3.0 | 3.3 | 3.6 | 3.9 | 4.0 | 4.2 | 4.5 | 4.7 | 4.8 | 5.0 | 5.2 | 5.3 | 5.5 | 5.8 | 6.0 | 6.4 | 6.5 | 6.5 | 6.8 | 7.0 | 7.0 | 7.4 |
| 11S1        | <i>Adnp</i> <sup>+/+</sup> | Saline/DD |     | 3.2 | 3.5 | 3.7 | 4.0 | 4.0 | 4.1 | 4.4 | 4.7 | 4.9 | 5.0 | 5.4 | 5.6 | 5.8 | 6.0 | 6.2 | 6.4 | 6.6 | 6.6 | 7.0 |     |     |
| 11S4        | <i>Adnp</i> <sup>+/+</sup> | Saline/DD |     | 3.4 | 3.5 | 3.8 | 4.1 | 4.3 | 4.3 | 4.7 | 5.0 | 5.2 | 5.5 | 5.5 | 5.5 | 5.9 | 6.1 | 6.4 | 6.6 | 6.6 | 6.7 | 7.0 |     |     |
| 12S3        | <i>Adnp</i> <sup>+/+</sup> | Saline/DD |     | 3.5 | 3.6 | 3.9 | 4.2 | 4.3 | 4.6 | 4.6 | 4.9 | 5.2 | 5.5 | 5.8 | 6.0 | 6.3 | 6.8 | 7.0 | 7.1 | 7.2 | 7.5 | 7.5 | 7.5 |     |
| 2970        | <i>Adnp</i> <sup>+/-</sup> | Saline/DD | 3.1 | 3.3 | 3.6 | 3.7 | 4.0 | 4.0 | 4.2 | 4.3 | 5.0 | 5.5 | 5.5 | 5.5 | 5.3 | 6.0 | 6.0 | 6.0 | 6.3 | 6.5 | 6.7 | 6.9 | 7.1 |     |
| 2969        | <i>Adnp</i> <sup>+/-</sup> | Saline/DD | 2.9 | 3.2 | 3.4 | 3.7 | 4.0 | 4.0 | 4.1 | 4.5 | 4.6 | 4.9 | 5.1 | 5.1 | 5.5 | 5.8 | 5.9 | 6.2 | 6.2 | 6.3 | 6.8 | 6.8 | 6.8 | 7.0 |
| 2985        | <i>Adnp</i> <sup>+/-</sup> | Saline/DD | 3.0 | 3.3 | 3.4 | 3.7 | 4.1 | 4.3 | 4.3 | 5.0 | 5.0 | 5.0 | 5.2 | 5.3 | 5.4 | 5.6 | 5.6 | 6.1 | 6.1 | 6.5 | 6.5 | 6.5 | 7.0 | 7.0 |
| 3004        | <i>Adnp</i> <sup>+/-</sup> | Saline/DD | 2.9 | 3.1 | 3.4 | 3.5 | 3.8 | 4.1 | 4.5 | 4.6 | 5.0 | 5.2 | 5.3 | 5.7 | 5.7 | 5.8 | 6.1 | 6.1 | 6.6 | 6.6 | 6.7 | 7.2 | 7.2 | 7.5 |
| 3056        | <i>Adnp</i> <sup>+/-</sup> | Saline/DD | 3.2 | 3.5 | 3.7 | 4.0 | 4.0 | 4.3 | 4.3 | 4.6 | 4.7 | 5.0 | 5.3 | 5.4 | 5.5 | 5.9 | 6.1 | 6.3 | 6.5 | 6.6 | 7.0 | 7.2 | 7.4 | 7.6 |
| 3069        | <i>Adnp</i> <sup>+/-</sup> | Saline/DD | 3.2 | 3.3 | 3.5 | 3.6 | 3.9 | 4.0 | 4.2 | 4.2 | 4.6 | 4.9 | 5.0 | 5.2 | 5.5 | 5.8 | 6.0 | 6.1 | 6.2 | 6.5 | 6.8 | 7.0 | 7.2 | 7.2 |
| 8S4         | <i>Adnp</i> <sup>+/-</sup> | Saline/DD | 3.0 | 3.3 | 3.6 | 3.9 | 4.1 | 4.2 | 4.4 | 4.6 | 4.9 | 5.0 | 5.3 | 5.6 | 5.9 | 6.1 | 6.4 | 6.5 | 6.5 | 6.9 | 7.0 | 7.2 | 7.3 | 7.4 |
| 9S2         | <i>Adnp</i> <sup>+/-</sup> | Saline/DD |     | 3.4 | 3.4 | 3.7 | 3.9 | 4.0 | 4.1 | 4.1 | 4.5 | 4.8 | 5.2 | 5.5 | 5.7 | 5.7 | 6.0 | 6.3 | 6.4 | 6.5 | 6.5 | 6.6 | 6.9 | 7.1 |
| 9S3         | <i>Adnp</i> <sup>+/-</sup> | Saline/DD |     | 3.4 | 3.6 | 3.9 | 4.1 | 4.3 | 4.5 | 4.5 | 4.8 | 5.0 | 5.3 | 5.5 | 5.6 | 5.6 | 6.0 | 6.2 | 6.6 | 6.7 | 7.0 | 7.2 | 7.3 | 7.4 |
| 9S4         | <i>Adnp</i> <sup>+/-</sup> | Saline/DD |     | 3.4 | 3.6 | 3.9 | 4.0 | 4.1 | 4.2 | 4.4 | 4.8 | 5.0 | 5.3 | 5.6 | 5.8 | 5.8 | 6.1 | 6.2 | 6.3 | 6.5 | 6.5 | 6.6 | 6.9 | 7.0 |
| 10S4        | <i>Adnp</i> <sup>+/-</sup> | Saline/DD | 3.1 | 3.4 | 3.6 | 3.9 | 4.0 | 4.3 | 4.5 | 4.5 | 4.6 | 4.8 | 5.1 | 5.1 | 5.4 | 5.7 | 5.8 | 6.0 | 6.0 | 6.2 | 6.5 | 6.5 | 6.6 | 6.9 |
| 11S2        | <i>Adnp</i> <sup>+/-</sup> | Saline/DD |     | 3.4 | 3.6 | 3.9 | 4.0 | 4.2 | 4.2 | 4.5 | 4.7 | 5.0 | 5.3 | 5.5 | 5.6 | 5.9 | 6.1 | 6.4 | 6.6 | 6.7 | 6.8 | 7.0 |     |     |
| 2974        | <i>Adnp</i> <sup>+/-</sup> | Saline/DD | 3.0 | 3.2 | 3.5 | 3.7 | 3.9 | 4.2 | 4.3 | 4.5 | 4.7 | 5.0 | 5.2 | 5.2 | 5.4 | 5.5 | 5.5 | 6.0 | 6.0 | 6.0 | 6.2 | 6.5 | 6.6 | 6.8 |
| 3023        | <i>Adnp</i> <sup>+/-</sup> | Saline/DD | 3.0 | 3.2 | 3.5 | 3.6 | 3.6 | 3.9 | 4.0 | 4.2 | 4.5 | 4.8 | 5.0 | 5.0 | 5.2 | 5.4 | 5.7 | 6.0 | 6.1 | 6.3 | 6.5 | 6.6 | 6.6 | 6.8 |
| 3024        | <i>Adnp</i> <sup>+/-</sup> | Saline/DD | 3.0 | 3.3 | 3.3 | 3.5 | 3.7 | 3.8 | 3.8 | 3.9 | 4.2 | 4.5 | 4.7 | 4.8 | 4.8 | 5.0 | 5.3 | 5.5 | 5.6 | 5.7 | 6.0 | 6.1 | 6.1 | 6.3 |
| 3074        | <i>Adnp</i> <sup>+/-</sup> | Saline/DD | 3.0 | 3.3 | 3.5 | 3.8 | 4.0 | 4.0 | 4.3 | 4.3 | 4.5 | 4.7 | 5.0 | 5.0 | 5.5 | 5.8 | 6.0 | 6.1 | 6.3 | 6.5 | 6.5 | 6.6 | 6.7 | 6.8 |
| 3146        | <i>Adnp</i> <sup>+/-</sup> | Saline/DD | 3.1 | 3.5 | 3.5 | 3.6 | 3.9 | 4.0 | 4.1 | 4.4 | 4.6 | 4.6 | 4.9 | 5.5 | 5.6 | 5.7 | 6.0 | 6.2 | 6.3 | 6.4 | 6.5 | 6.6 | 6.6 | 6.7 |
| 8S5         | <i>Adnp</i> <sup>+/-</sup> | Saline/DD | 3.0 | 3.2 | 3.4 | 3.6 | 3.9 | 4.2 | 4.2 | 4.4 | 4.6 | 4.7 | 5.0 | 5.4 | 5.6 | 5.8 | 6.0 | 6.1 | 6.1 | 6.1 | 6.4 | 6.7 | 6.8 | 7.0 |
| 10S3        | <i>Adnp</i> <sup>+/-</sup> | Saline/DD | 3.0 | 3.3 | 3.5 | 3.7 | 3.7 | 4.0 | 4.2 | 4.5 | 4.5 | 4.6 | 4.7 | 5.0 | 5.2 | 5.5 | 5.5 | 5.9 | 6.1 | 6.2 | 6.3 | 6.5 | 6.6 | 6.7 |
| 10S5        | <i>Adnp</i> <sup>+/-</sup> | Saline/DD | 2.8 | 3.1 | 3.1 | 3.4 | 3.4 | 3.6 | 3.6 | 3.7 | 3.8 | 4.0 | 4.2 | 4.4 | 4.6 | 4.7 | 4.9 | 5.2 | 5.5 | 5.5 | 5.6 | 5.8 | 6.0 | 6.1 |

| Length (cm) |                            |           |     |     |     |     |     |     |     |     |     |     |     |     |     |     |     |     |     |     |     |     |     |     |
|-------------|----------------------------|-----------|-----|-----|-----|-----|-----|-----|-----|-----|-----|-----|-----|-----|-----|-----|-----|-----|-----|-----|-----|-----|-----|-----|
| Number      | Genotype                   | Treatment | 0   | 1   | 2   | 3   | 4   | 5   | 6   | 7   | 8   | 9   | 10  | 11  | 12  | 13  | 14  | 15  | 16  | 17  | 18  | 19  | 20  | 21  |
| 12S4        | <i>Adnp</i> <sup>+/-</sup> | Saline/DD |     | 3.4 | 3.5 | 3.9 | 4.1 | 4.1 | 4.4 | 4.7 | 5.0 | 5.4 | 5.5 | 5.9 | 6.2 | 6.5 | 6.5 | 6.6 | 7.0 | 7.0 | 7.4 | 7.5 | 7.6 |     |
| 2971        | <i>Adnp</i> <sup>+/+</sup> | NAP       | 3.0 | 3.4 | 3.6 | 3.7 | 4.1 | 4.4 | 4.5 | 4.7 | 4.9 | 5.0 | 5.5 | 5.5 | 6.0 | 6.0 | 6.3 | 6.3 | 6.5 | 6.8 | 7.0 | 7.0 | 7.3 | 7.5 |
| 2972        | <i>Adnp</i> <sup>+/+</sup> | NAP       | 3.1 | 3.4 | 3.7 | 3.8 | 4.2 | 4.3 | 4.3 | 4.5 | 5.0 | 5.3 | 5.5 | 5.5 | 5.7 | 6.0 | 6.2 | 6.2 | 6.5 | 6.5 | 6.8 | 7.0 | 7.0 | 7.6 |
| 2986        | <i>Adnp</i> <sup>+/+</sup> | NAP       | 3.1 | 3.3 | 3.5 | 3.8 | 4.0 | 4.2 | 4.3 | 4.6 | 4.9 | 5.2 | 5.2 | 5.2 | 5.2 | 5.5 | 5.8 | 6.2 | 6.2 | 6.4 | 6.5 | 6.5 | 7.0 | 7.0 |
| 3005        | <i>Adnp</i> <sup>+/+</sup> | NAP       | 3.0 | 3.2 | 3.5 | 3.9 | 4.0 | 4.3 | 4.5 | 4.8 | 4.9 | 5.1 | 5.5 | 6.0 | 6.0 | 6.2 | 6.4 | 6.5 | 6.8 | 6.9 | 7.0 | 7.3 | 7.5 | 7.5 |
| 3053        | <i>Adnp</i> <sup>+/+</sup> | NAP       | 3.5 | 3.5 | 3.8 | 4.2 | 4.2 | 4.5 | 4.5 | 4.8 | 4.8 | 5.1 | 5.3 | 5.5 | 5.6 | 6.1 | 6.4 | 6.6 | 6.7 | 6.9 | 7.2 | 7.5 | 7.6 | 7.7 |
| 3073        | <i>Adnp</i> <sup>+/+</sup> | NAP       | 3.2 | 3.4 | 3.8 | 3.8 | 4.1 | 4.3 | 4.5 | 4.5 | 4.8 | 5.0 | 5.3 | 5.5 | 5.8 | 6.1 | 6.4 | 6.6 | 6.8 | 7.0 | 7.1 | 7.3 | 7.5 | 7.7 |
| 3147        | <i>Adnp</i> <sup>+/+</sup> | NAP       | 3.2 | 3.6 | 3.7 | 3.9 | 4.1 | 4.2 | 4.5 | 4.5 | 4.8 | 5.0 | 5.3 | 5.3 | 5.6 | 6.0 | 6.4 | 6.6 | 6.9 | 7.1 | 7.2 | 7.5 | 7.6 | 7.7 |
| 7N1         | <i>Adnp</i> <sup>+/+</sup> | NAP       | 2.9 | 3.2 | 3.5 | 3.7 | 3.8 | 4.1 | 4.3 | 4.5 | 4.7 | 5.0 | 5.3 | 5.4 | 5.6 | 6.0 | 6.3 | 6.6 | 6.9 | 7.1 | 7.3 | 7.3 | 7.4 | 7.6 |
| 7N3         | <i>Adnp</i> <sup>+/+</sup> | NAP       | 3.5 | 3.7 | 4.0 | 4.2 | 4.2 | 4.5 | 4.7 | 4.8 | 5.1 | 5.2 | 5.5 | 5.7 | 6.0 | 6.4 | 6.6 | 6.8 | 7.0 | 7.2 | 7.4 |     | 7.7 | 7.9 |
| 8N3         | <i>Adnp</i> <sup>+/+</sup> | NAP       | 3.2 | 3.5 | 3.6 | 3.9 | 4.1 | 4.1 | 4.4 | 4.7 | 5.0 | 5.1 | 5.2 | 5.6 | 6.0 | 6.1 | 6.4 | 6.5 | 6.5 | 6.5 | 6.5 | 6.8 | 7.1 | 7.4 |
| 9N3         | <i>Adnp</i> <sup>+/+</sup> | NAP       |     | 3.5 | 3.8 | 4.1 | 4.1 | 4.3 | 4.3 | 4.5 | 4.8 | 5.1 | 5.4 | 5.6 | 5.9 | 5.9 | 6.2 | 6.5 | 6.6 | 6.7 | 6.7 | 7.0 | 7.1 | 7.4 |
| 9N4         | <i>Adnp</i> <sup>+/+</sup> | NAP       |     | 3.5 | 3.6 | 4.0 | 4.0 | 4.2 | 4.3 | 4.4 | 4.7 | 5.0 | 5.3 | 5.6 | 5.8 | 5.8 | 6.1 | 6.4 | 6.6 | 7.0 | 7.1 | 7.2 | 7.5 | 7.6 |
| 10N1        | <i>Adnp</i> <sup>+/+</sup> | NAP       | 3.3 | 3.5 | 3.8 | 4.0 | 4.0 | 4.1 | 4.5 | 4.7 | 5.0 | 5.1 | 5.4 | 5.5 | 5.7 | 6.0 | 6.1 | 6.5 | 6.5 | 6.6 | 6.8 | 7.0 | 7.0 | 7.4 |
| 11N5        | <i>Adnp</i> <sup>+/+</sup> | NAP       |     | 3.3 | 3.6 | 3.9 | 4.0 | 4.2 | 4.3 | 4.5 | 4.8 | 5.1 | 5.2 | 5.5 | 5.7 | 6.0 | 6.1 | 6.4 | 6.7 | 6.8 | 6.8 | 7.0 |     |     |
| 2966        | <i>Adnp</i> <sup>+/+</sup> | NAP       | 2.8 | 3.2 | 3.3 | 3.5 | 3.7 | 3.7 | 4.1 | 4.4 | 4.5 | 4.6 | 5.3 | 5.3 | 5.3 | 5.5 | 5.5 | 6.0 | 6.0 | 6.2 | 6.8 | 6.8 | 6.8 | 7.1 |
| 2975        | <i>Adnp</i> <sup>+/+</sup> | NAP       | 3.1 | 3.3 | 3.5 | 3.8 | 4.1 | 4.5 | 4.5 | 4.5 | 5.0 | 5.5 | 5.5 | 5.7 | 5.7 | 6.2 | 6.3 | 6.5 | 6.5 | 6.5 | 6.5 | 7.0 | 7.2 | 7.2 |
| 2980        | <i>Adnp</i> <sup>+/+</sup> | NAP       | 3.2 | 3.4 | 3.6 | 3.9 | 4.2 | 4.3 | 4.5 | 4.5 | 4.7 | 5.3 | 5.5 | 5.6 | 5.6 | 6.0 | 6.0 | 6.0 | 6.2 | 6.4 | 6.8 | 7.0 | 7.0 | 7.2 |
| 2991        | <i>Adnp</i> <sup>+/+</sup> | NAP       | 3.2 | 3.5 | 3.6 | 4.0 | 4.0 | 4.4 | 4.5 | 5.0 | 5.2 | 5.2 | 5.5 | 5.6 | 6.1 | 6.2 | 6.5 | 6.5 | 6.7 | 6.7 | 7.3 | 7.7 | 7.7 | 7.7 |
| 2988        | <i>Adnp</i> <sup>+/+</sup> | NAP       | 3.4 | 3.4 | 3.7 | 3.9 | 3.9 | 4.3 | 4.4 | 4.7 | 5.0 | 5.4 | 5.5 | 5.7 | 6.0 | 6.2 | 6.5 | 6.7 | 6.7 | 6.7 | 7.1 | 7.6 | 7.6 | 8.0 |
| 2999        | <i>Adnp</i> <sup>+/+</sup> | NAP       | 3.1 | 3.2 | 3.6 | 3.8 | 4.0 | 4.1 | 4.6 | 4.8 | 4.8 | 5.1 | 5.2 | 5.8 | 5.8 | 6.1 | 6.4 | 6.8 | 6.9 | 6.9 | 7.3 | 7.5 | 7.7 | 8.2 |
| 3018        | <i>Adnp</i> <sup>+/+</sup> | NAP       | 3.3 | 3.4 | 3.6 | 3.7 | 3.8 | 4.2 | 4.2 | 4.5 | 4.8 | 5.2 | 5.3 | 5.6 | 5.7 | 6.0 | 6.4 | 6.6 | 6.8 | 6.9 | 7.2 | 7.3 | 7.5 | 7.5 |
| 3025        | <i>Adnp</i> <sup>+/+</sup> | NAP       | 3.0 | 3.1 | 3.5 | 4.0 | 4.0 | 4.3 | 4.3 | 4.6 | 4.7 | 5.0 | 5.3 | 5.6 | 5.7 | 6.0 | 6.3 | 6.4 | 6.5 | 6.6 | 7.0 | 7.1 | 7.2 | 7.4 |
| 3054        | <i>Adnp</i> <sup>+/+</sup> | NAP       | 3.1 | 3.4 | 3.7 | 3.7 | 3.9 | 4.2 | 4.2 | 4.6 | 4.6 | 4.9 | 5.2 | 5.4 | 5.6 | 5.8 | 6.1 | 6.3 | 6.5 | 6.6 | 7.0 | 7.1 | 7.3 | 7.5 |
| 3068        | <i>Adnp</i> <sup>+/+</sup> | NAP       | 3.1 | 3.2 | 3.5 | 3.9 | 4.1 | 4.1 | 4.3 | 4.5 | 4.8 | 5.0 | 5.3 | 5.3 | 5.5 | 5.7 | 6.0 | 6.2 | 6.5 | 6.6 | 6.6 | 6.8 | 7.0 | 7.2 |
| 8N1         | <i>Adnp</i> <sup>+/+</sup> | NAP       | 3.1 | 3.4 | 3.5 | 3.8 | 3.9 | 4.1 | 4.3 | 4.5 | 4.8 | 4.8 | 5.1 | 5.4 | 5.7 | 6.0 | 6.3 | 6.4 | 6.6 | 6.6 | 6.9 | 7.2 | 7.3 | 7.5 |
| 9N5         | <i>Adnp</i> <sup>+/+</sup> | NAP       |     | 3.5 | 3.8 | 4.0 | 4.2 | 4.3 | 4.3 | 4.5 | 4.7 | 5.0 | 5.4 | 5.6 | 5.8 | 5.8 | 6.2 | 6.5 | 6.7 | 6.7 | 7.0 | 7.0 | 7.2 | 7.5 |
| 10N6        | <i>Adnp</i> <sup>+/+</sup> | NAP       | 3.1 | 3.4 | 3.5 | 3.8 | 3.8 | 4.0 | 4.3 | 4.5 | 4.8 | 5.0 | 5.3 | 5.4 | 5.5 | 5.8 | 6.0 | 6.3 | 6.5 | 6.6 | 6.7 | 6.8 | 7.0 | 7.3 |
| 11N1        | <i>Adnp</i> <sup>+/+</sup> | NAP       |     | 3.5 | 3.5 | 3.7 | 4.0 | 4.3 | 4.3 | 4.5 | 4.9 | 5.1 | 5.3 | 5.5 | 5.7 | 6.0 | 6.3 | 6.5 | 6.5 | 6.7 | 6.7 | 7.0 |     |     |
| 11N2        | <i>Adnp</i> <sup>+/+</sup> | NAP       |     | 3.3 | 3.6 | 3.8 | 4.0 | 4.1 | 4.1 | 4.4 | 4.7 | 5.0 | 5.3 | 5.5 | 5.6 | 6.0 | 6.1 | 6.4 | 6.7 | 6.7 | 6.7 | 6.9 |     |     |

| Length (cm) |                           |           |     |     |     |     |     |     |     |     |     |     |     |     |     |     |     |     |     |     |     |     |     |     |
|-------------|---------------------------|-----------|-----|-----|-----|-----|-----|-----|-----|-----|-----|-----|-----|-----|-----|-----|-----|-----|-----|-----|-----|-----|-----|-----|
| Number      | Genotype                  | Treatment | 0   | 1   | 2   | 3   | 4   | 5   | 6   | 7   | 8   | 9   | 10  | 11  | 12  | 13  | 14  | 15  | 16  | 17  | 18  | 19  | 20  | 21  |
| 12N1        | <i>Adnp<sup>+/+</sup></i> | NAP       |     | 3.5 | 3.5 | 3.9 | 4.1 | 4.3 | 4.5 | 4.7 | 5.1 | 5.5 | 5.6 | 5.8 | 6.0 | 6.4 | 6.5 | 6.8 | 6.9 | 7.0 | 7.4 | 7.5 | 7.5 |     |
| 12N3        | <i>Adnp<sup>+/+</sup></i> | NAP       |     | 3.4 | 3.5 | 3.9 | 4.1 | 4.3 | 4.5 | 4.7 | 5.1 | 5.3 | 5.6 | 6.0 | 6.2 | 6.2 | 6.4 | 6.7 | 6.8 | 7.0 | 7.2 | 7.5 | 7.6 |     |
| 2982        | <i>Adnp<sup>+/-</sup></i> | NAP       | 3.0 | 3.0 | 3.5 | 3.6 | 3.8 | 4.2 | 4.3 | 4.5 | 5.0 | 5.0 | 5.3 | 5.7 | 5.7 | 6.1 | 6.1 | 6.1 | 6.3 | 6.3 | 6.3 | 6.5 | 6.8 | 7.0 |
| 2995        | <i>Adnp<sup>+/-</sup></i> | NAP       | 3.1 | 3.5 | 3.9 | 4.1 | 4.1 | 4.3 | 4.3 | 4.9 | 4.9 | 5.1 | 5.4 | 5.7 | 6.2 | 6.2 | 6.2 | 6.3 | 6.4 | 6.5 | 6.8 | 7.0 | 7.0 | 7.4 |
| 3017        | <i>Adnp<sup>+/-</sup></i> | NAP       | 3.0 | 3.5 | 3.8 | 3.8 | 3.9 | 4.2 | 4.3 | 4.5 | 4.7 | 5.1 | 5.3 | 5.5 | 5.5 | 5.9 | 6.2 | 6.4 | 6.5 | 6.7 | 7.0 | 7.1 | 7.4 | 7.6 |
| 3065        | <i>Adnp<sup>+/-</sup></i> | NAP       | 2.9 | 3.1 | 3.3 | 3.9 | 3.9 | 3.9 | 3.9 | 4.1 | 4.1 | 4.1 | 4.3 | 4.4 | 4.4 | 4.6 | 4.7 | 4.9 | 5.1 | 5.2 | 5.5 | 5.6 | 5.6 | 5.7 |
| 3067        | <i>Adnp<sup>+/-</sup></i> | NAP       | 3.0 | 3.2 | 3.5 | 3.5 | 3.7 | 3.8 | 4.2 | 4.2 | 4.5 | 4.8 | 5.0 | 5.0 | 5.3 | 5.5 | 5.7 | 6.0 | 6.2 | 6.2 | 6.4 | 6.5 | 6.7 | 6.8 |
| 7N2         | <i>Adnp<sup>+/-</sup></i> | NAP       | 3.4 | 3.5 | 3.7 | 4.0 | 4.1 | 4.3 | 4.5 | 4.6 | 4.9 | 5.2 | 5.5 | 5.5 | 5.8 | 6.1 | 6.4 | 6.7 | 6.9 | 7.1 | 7.2 | 7.2 | 7.4 | 7.5 |
| 8N4         | <i>Adnp<sup>+/-</sup></i> | NAP       | 3.1 | 3.4 | 3.5 | 3.8 | 3.9 | 4.1 | 4.3 | 4.6 | 4.8 | 5.0 | 5.2 | 5.5 | 5.8 | 5.8 | 6.0 | 6.3 | 6.4 | 6.4 | 7.0 | 7.2 | 7.5 | 7.5 |
| 8N5         | <i>Adnp<sup>+/-</sup></i> | NAP       | 3.0 | 3.2 | 3.4 | 3.7 | 4.0 | 4.3 | 4.5 | 4.7 | 5.0 | 5.0 | 5.2 | 5.6 | 5.8 | 6.0 | 6.2 | 6.5 | 6.7 | 6.7 | 7.0 | 7.3 | 7.4 | 7.5 |
| 9N2         | <i>Adnp<sup>+/-</sup></i> | NAP       |     | 3.4 | 3.6 | 3.9 | 4.1 | 4.2 | 4.4 | 4.5 | 4.7 | 5.0 | 5.3 | 5.5 | 5.7 | 5.8 | 6.1 | 6.3 | 6.4 | 6.5 | 6.6 | 6.7 | 7.0 | 7.2 |
| 10N4        | <i>Adnp<sup>+/-</sup></i> | NAP       | 3.0 | 3.2 | 3.3 | 3.4 | 3.7 | 3.9 | 4.2 | 4.5 | 4.5 | 4.7 | 5.0 | 5.1 | 5.4 | 5.7 | 5.8 | 6.1 | 6.1 | 6.2 | 6.5 | 6.5 | 6.6 | 6.9 |
| 12N4        | <i>Adnp<sup>+/-</sup></i> | NAP       |     | 3.4 | 3.6 | 3.9 | 4.1 | 4.3 | 4.7 | 5.0 | 5.1 | 5.4 | 5.6 | 5.9 | 6.1 | 6.2 | 6.5 | 6.7 | 7.0 | 7.0 | 7.0 | 7.2 | 7.5 |     |
| 12N5        | <i>Adnp<sup>+/-</sup></i> | NAP       |     | 3.2 | 3.5 | 3.9 | 4.1 | 4.2 | 4.4 | 4.7 | 5.1 | 5.5 | 5.6 | 5.8 | 6.0 | 6.4 | 6.4 | 6.5 | 6.6 | 6.6 | 6.8 | 6.8 | 7.0 |     |
| 2964        | <i>Adnp<sup>+/-</sup></i> | NAP       | 2.9 | 3.2 | 3.5 | 3.7 | 3.8 | 4.0 | 4.2 | 4.4 | 4.7 | 5.0 | 5.0 | 5.4 | 5.4 | 6.0 | 6.1 | 6.3 | 6.3 | 6.3 | 6.5 | 6.7 | 7.0 | 7.0 |
| 2965        | <i>Adnp<sup>+/-</sup></i> | NAP       | 3.0 | 3.2 | 3.3 | 3.5 | 3.9 | 4.2 | 4.2 | 4.5 | 4.6 | 4.9 | 5.1 | 5.1 | 5.5 | 5.5 | 5.8 | 6.1 | 6.1 | 6.5 | 6.6 | 6.7 | 6.9 | 7.1 |
| 2967        | <i>Adnp<sup>+/-</sup></i> | NAP       | 3.0 | 3.2 | 3.5 | 3.8 | 4.0 | 4.0 | 4.2 | 4.2 | 4.8 | 5.0 | 5.3 | 5.3 | 5.4 | 5.5 | 5.8 | 5.8 | 6.0 | 6.4 | 6.8 | 7.0 | 7.0 | 7.0 |
| 2976        | <i>Adnp<sup>+/-</sup></i> | NAP       | 2.9 | 3.3 | 3.3 | 3.8 | 3.8 | 4.1 | 4.1 | 4.7 | 4.7 | 5.0 | 5.0 | 5.0 | 5.2 | 5.2 | 5.2 | 5.2 | 6.0 | 6.0 | 6.0 | 6.0 | 6.2 | 6.7 |
| 2978        | <i>Adnp<sup>+/-</sup></i> | NAP       | 3.1 | 3.2 | 3.6 | 3.8 | 4.0 | 4.0 | 4.5 | 4.5 | 4.6 | 5.0 | 5.5 | 5.6 | 5.6 | 5.6 | 5.6 | 5.8 | 6.1 | 6.1 | 6.5 | 6.5 | 7.0 | 7.0 |
| 2979        | <i>Adnp<sup>+/-</sup></i> | NAP       | 3.2 | 3.2 | 3.2 | 3.7 | 3.8 | 4.0 | 4.5 | 4.5 | 4.6 | 4.8 | 5.1 | 5.2 | 5.5 | 5.5 | 5.5 | 5.6 | 5.6 | 6.0 | 6.0 | 6.0 | 6.5 | 6.5 |
| 2989        | <i>Adnp<sup>+/-</sup></i> | NAP       | 3.1 | 3.2 | 3.4 | 3.8 | 4.0 | 4.1 | 4.1 | 4.5 | 5.0 | 5.0 | 5.3 | 5.5 | 5.7 | 5.9 | 6.1 | 6.4 | 6.4 | 6.5 | 7.0 | 7.3 | 7.3 | 7.3 |
| 2987        | <i>Adnp<sup>+/-</sup></i> | NAP       | 3.1 | 3.4 | 3.6 | 4.0 | 4.0 | 4.2 | 4.5 | 4.6 | 4.9 | 5.3 | 5.3 | 5.9 | 5.9 | 6.0 | 6.2 | 6.5 | 6.6 | 6.6 | 6.8 | 7.0 | 7.4 | 8.0 |
| 2998        | <i>Adnp<sup>+/-</sup></i> | NAP       | 2.9 | 3.2 | 3.3 | 3.5 | 3.8 | 4.1 | 4.4 | 4.6 | 4.8 | 5.2 | 5.2 | 5.6 | 5.6 | 6.0 | 6.2 | 6.2 | 6.5 | 6.8 | 6.9 | 7.0 | 7.5 | 7.5 |
| 3000        | <i>Adnp<sup>+/-</sup></i> | NAP       | 2.7 | 3.2 | 3.3 | 3.5 | 3.8 | 4.1 | 4.5 | 4.5 | 4.7 | 5.1 | 5.3 | 5.7 | 5.8 | 5.8 | 6.1 | 6.4 | 6.5 | 6.6 | 7.0 | 7.2 | 7.5 | 7.5 |
| 2997        | <i>Adnp<sup>+/-</sup></i> | NAP       | 3.1 | 3.3 | 3.5 | 3.8 | 3.8 | 4.2 | 4.3 | 4.8 | 4.8 | 5.3 | 5.3 | 5.6 | 5.6 | 6.0 | 6.1 | 5.8 | 6.3 | 6.8 | 7.0 | 7.0 | 7.1 | 7.5 |
| 3057        | <i>Adnp<sup>+/-</sup></i> | NAP       | 2.8 | 3.2 | 3.5 | 3.7 | 3.7 | 3.9 | 3.9 | 4.1 | 4.2 | 4.5 | 4.7 | 5.0 | 5.1 | 5.4 | 5.6 | 5.9 | 6.0 | 6.2 | 6.4 | 6.5 | 6.6 | 6.8 |
| 3072        | <i>Adnp<sup>+/-</sup></i> | NAP       | 3.1 | 3.3 | 3.4 | 3.6 | 3.9 | 4.0 | 4.3 | 4.4 | 4.6 | 4.9 | 5.0 | 5.2 | 5.5 | 5.8 | 6.1 | 6.2 | 6.3 | 6.5 | 6.7 | 6.8 | 7.0 | 7.1 |
| 3075        | <i>Adnp<sup>+/-</sup></i> | NAP       | 3.0 | 3.3 | 3.4 | 3.7 | 3.7 | 4.0 | 4.2 | 4.2 | 4.5 | 4.6 | 4.9 | 5.0 | 5.3 | 5.6 | 5.8 | 6.0 | 6.1 | 6.2 | 6.4 | 6.4 | 6.6 | 6.8 |
| 3148        | <i>Adnp<sup>+/-</sup></i> | NAP       | 2.9 | 3.2 | 3.4 | 3.5 | 3.8 | 3.8 | 4.0 | 4.3 | 4.5 | 4.5 | 4.7 | 4.8 | 5.0 | 5.2 | 5.4 | 5.7 | 5.8 | 6.0 | 6.0 | 6.1 | 6.4 | 6.6 |
| 8N2         | <i>Adnp<sup>+/-</sup></i> | NAP       | 3.1 | 3.4 | 3.5 | 3.8 | 4.1 | 4.1 | 4.3 | 4.6 | 4.9 | 5.0 | 5.3 | 5.6 | 5.8 | 6.0 | 6.3 | 6.4 | 6.5 | 6.6 | 6.9 | 7.1 | 7.2 | 7.4 |

| Length (cm) |                            |           |     |     |     |     |     |     |     |     |     |     |     |     |     |     |     |     |     |     |     |     |     |     |
|-------------|----------------------------|-----------|-----|-----|-----|-----|-----|-----|-----|-----|-----|-----|-----|-----|-----|-----|-----|-----|-----|-----|-----|-----|-----|-----|
| Number      | Genotype                   | Treatment | 0   | 1   | 2   | 3   | 4   | 5   | 6   | 7   | 8   | 9   | 10  | 11  | 12  | 13  | 14  | 15  | 16  | 17  | 18  | 19  | 20  | 21  |
| 9N1         | <i>Adnp</i> <sup>+/-</sup> | NAP       |     | 3.0 | 3.5 | 3.8 | 4.0 | 4.1 | 4.1 | 4.2 | 4.6 | 4.8 | 5.2 | 5.3 | 5.6 | 5.7 | 6.0 | 6.2 | 6.5 | 6.6 | 6.6 | 6.7 | 7.0 | 7.1 |
| 10N2        | <i>Adnp</i> <sup>+/-</sup> | NAP       | 3.2 | 3.5 | 3.5 | 3.7 | 3.7 | 4.0 | 4.2 | 4.3 | 4.6 | 5.0 | 5.3 | 5.3 | 5.6 | 6.0 | 6.0 | 6.2 | 6.3 | 6.3 | 6.5 | 6.6 | 6.6 | 6.7 |
| 10N3        | <i>Adnp</i> <sup>+/-</sup> | NAP       | 3.0 | 3.3 | 3.6 | 3.7 | 3.7 | 4.0 | 4.2 | 4.5 | 4.6 | 4.7 | 5.0 | 5.2 | 5.3 | 5.6 | 5.7 | 6.0 | 6.1 | 6.2 | 6.5 | 6.6 | 6.6 | 6.7 |
| 10N5        | <i>Adnp</i> <sup>+/-</sup> | NAP       | 3.1 | 3.4 | 3.5 | 3.7 | 3.7 | 4.0 | 4.2 | 4.3 | 4.5 | 4.7 | 5.0 | 5.1 | 5.1 | 5.5 | 5.5 | 5.8 | 6.2 | 6.2 | 6.4 | 6.4 | 6.5 | 6.5 |
| 11N3        | <i>Adnp</i> <sup>+/-</sup> | NAP       |     | 3.2 | 3.4 | 3.7 | 4.1 | 4.3 | 4.3 | 4.6 | 5.0 | 5.2 | 5.3 | 5.5 | 5.7 | 6.0 | 6.0 | 6.2 | 6.5 | 6.6 | 6.6 | 6.9 |     |     |
| 11N4        | <i>Adnp</i> <sup>+/-</sup> | NAP       |     | 3.3 | 3.6 | 3.7 | 4.0 | 4.1 | 4.1 | 4.5 | 4.9 | 5.0 | 5.2 | 5.5 | 5.7 | 6.0 | 6.0 | 6.2 | 6.6 | 6.7 | 6.7 | 6.8 |     |     |
| 12N2        | <i>Adnp</i> <sup>+/-</sup> | NAP       |     | 3.2 | 3.4 | 3.8 | 4.0 | 4.1 | 4.2 | 4.5 | 4.7 | 5.0 | 5.3 | 5.5 | 5.6 | 5.6 | 5.6 | 6.0 | 6.3 | 6.3 | 6.6 | 6.7 | 6.8 |     |



**Table S27. Raw data for gait analysis.**

| Mouse No. | Genotype                  | Treatment | RF Stand (s) Mean | RF Swing (s) Mean | RF Stride Length (cm) Mean | RF Step Cycle (s) Mean | RF Single Stance (s) Mean | RH Stand (s) Mean | RH Swing (s) Mean | RH Stride Length (cm) Mean | RH Step Cycle (s) Mean | RH Single Stance (s) Mean | LF Stand (s) Mean | LF Swing (s) Mean | LF Stride Length (cm) Mean | LF Step Cycle (s) Mean | LF Single Stance (s) Mean | LH Stand (s) Mean | LH Swing (s) Mean | LH Stride Length (cm) Mean | LH Step Cycle (s) Mean | LH Single Stance (s) Mean |
|-----------|---------------------------|-----------|-------------------|-------------------|----------------------------|------------------------|---------------------------|-------------------|-------------------|----------------------------|------------------------|---------------------------|-------------------|-------------------|----------------------------|------------------------|---------------------------|-------------------|-------------------|----------------------------|------------------------|---------------------------|
| 12S1 M    | <i>Adnp<sup>+/+</sup></i> | Saline/DD | 0.22              | 0.10              | 6.29                       | 0.33                   | 0.12                      | 0.21              | 0.07              | 5.88                       | 0.29                   | 0.07                      | 0.17              | 0.11              | 5.48                       | 0.28                   | 0.08                      | 0.24              | 0.07              | 6.28                       | 0.32                   | 0.08                      |
| 12S2 M    | <i>Adnp<sup>+/+</sup></i> | Saline/DD | 0.12              | 0.10              | 6.92                       | 0.22                   | 0.10                      | 0.11              | 0.09              | 6.02                       | 0.19                   | 0.07                      | 0.13              | 0.10              | 6.90                       | 0.22                   | 0.10                      | 0.14              | 0.08              | 6.92                       | 0.22                   | 0.09                      |
| 7S1 M     | <i>Adnp<sup>+/+</sup></i> | Saline/DD | 0.13              | 0.09              | 5.14                       | 0.22                   | 0.09                      | 0.12              | 0.06              | 4.42                       | 0.19                   | 0.06                      | 0.12              | 0.09              | 4.88                       | 0.21                   | 0.08                      | 0.13              | 0.07              | 4.60                       | 0.21                   | 0.07                      |
| 7S2 M     | <i>Adnp<sup>+/+</sup></i> | Saline/DD | 0.19              | 0.12              | 4.57                       | 0.30                   | 0.12                      | 0.24              | 0.09              | 4.26                       | 0.31                   | 0.08                      | 0.18              | 0.12              | 4.50                       | 0.29                   | 0.11                      | 0.23              | 0.08              | 4.00                       | 0.28                   | 0.08                      |
| 8S1 M     | <i>Adnp<sup>+/+</sup></i> | Saline/DD | 0.19              | 0.09              | 4.50                       | 0.29                   | 0.10                      | 0.14              | 0.07              | 3.25                       | 0.21                   | 0.07                      | 0.18              | 0.10              | 4.51                       | 0.29                   | 0.09                      | 0.17              | 0.09              | 3.93                       | 0.26                   | 0.08                      |
| 9S5 M     | <i>Adnp<sup>+/+</sup></i> | Saline/DD | 0.10              | 0.08              | 6.52                       | 0.18                   | 0.07                      | 0.10              | 0.07              | 6.17                       | 0.17                   | 0.06                      | 0.11              | 0.08              | 6.87                       | 0.19                   | 0.08                      | 0.11              | 0.06              | 5.89                       | 0.16                   | 0.06                      |
| 11S3 M    | <i>Adnp<sup>+/+</sup></i> | Saline/DD | 0.02              | 0.10              | 6.97                       | 0.13                   | 0.01                      | 0.03              | 0.07              | 7.94                       | 0.10                   | 0.01                      | 0.04              | 0.07              | 6.17                       | 0.11                   | 0.02                      | 0.04              | 0.11              | 8.12                       | 0.15                   | 0.01                      |
| 3295M     | <i>Adnp<sup>+/+</sup></i> | Saline/DD | 0.24              | 0.11              | 5.49                       | 0.35                   | 0.13                      | 0.23              | 0.11              | 5.00                       | 0.35                   | 0.08                      | 0.18              | 0.11              | 4.76                       | 0.29                   | 0.10                      | 0.29              | 0.09              | 5.66                       | 0.38                   | 0.12                      |
| 3296M     | <i>Adnp<sup>+/+</sup></i> | Saline/DD | 0.20              | 0.13              | 5.73                       | 0.33                   | 0.12                      | 0.23              | 0.09              | 5.71                       | 0.32                   | 0.10                      | 0.20              | 0.12              | 5.81                       | 0.33                   | 0.13                      | 0.23              | 0.10              | 5.73                       | 0.33                   | 0.09                      |
| 3299M     | <i>Adnp<sup>+/+</sup></i> | Saline/DD | 0.19              | 0.13              | 5.22                       | 0.32                   | 0.12                      | 0.22              | 0.09              | 5.29                       | 0.31                   | 0.08                      | 0.19              | 0.12              | 5.27                       | 0.32                   | 0.13                      | 0.21              | 0.08              | 4.78                       | 0.28                   | 0.08                      |
| 3307M     | <i>Adnp<sup>+/+</sup></i> | Saline/DD | 0.23              | 0.11              | 4.41                       | 0.36                   | 0.13                      | 0.16              | 0.12              | 3.66                       | 0.29                   | 0.06                      | 0.21              | 0.17              | 4.94                       | 0.39                   | 0.11                      | 0.27              | 0.10              | 5.16                       | 0.39                   | 0.16                      |
| 3308M     | <i>Adnp<sup>+/+</sup></i> | Saline/DD | 0.19              | 0.12              | 5.29                       | 0.28                   | 0.10                      | 0.21              | 0.08              | 5.20                       | 0.28                   | 0.10                      | 0.19              | 0.10              | 5.15                       | 0.29                   | 0.11                      | 0.18              | 0.11              | 4.93                       | 0.27                   | 0.08                      |
| 3317M     | <i>Adnp<sup>+/+</sup></i> | Saline/DD | 0.22              | 0.12              | 5.39                       | 0.34                   | 0.12                      | 0.18              | 0.09              | 4.04                       | 0.27                   | 0.10                      | 0.21              | 0.12              | 5.07                       | 0.32                   | 0.12                      | 0.16              | 0.10              | 3.82                       | 0.25                   | 0.08                      |
| 3324M     | <i>Adnp<sup>+/+</sup></i> | Saline/DD | 0.12              | 0.09              | 5.82                       | 0.21                   | 0.09                      | 0.14              | 0.09              | 6.12                       | 0.22                   | 0.08                      | 0.12              | 0.10              | 6.24                       | 0.22                   | 0.10                      | 0.15              | 0.08              | 6.26                       | 0.22                   | 0.09                      |
| 3334M     | <i>Adnp<sup>+/+</sup></i> | Saline/DD | 0.18              | 0.09              | 4.48                       | 0.28                   | 0.09                      | 0.23              | 0.07              | 4.81                       | 0.30                   | 0.09                      | 0.19              | 0.10              | 4.83                       | 0.30                   | 0.10                      | 0.21              | 0.09              | 4.71                       | 0.30                   | 0.07                      |
| 3019M     | <i>Adnp<sup>+/+</sup></i> | Saline/DD | 0.16              | 0.11              | 6.43                       | 0.27                   | 0.12                      | 0.13              | 0.10              | 5.74                       | 0.24                   | 0.09                      | 0.16              | 0.12              | 6.42                       | 0.27                   | 0.11                      | 0.14              | 0.09              | 5.69                       | 0.22                   | 0.10                      |
| 3020M     | <i>Adnp<sup>+/+</sup></i> | Saline/DD | 0.15              | 0.12              | 6.43                       | 0.28                   | 0.12                      | 0.17              | 0.09              | 5.68                       | 0.25                   | 0.08                      | 0.16              | 0.12              | 6.47                       | 0.28                   | 0.12                      | 0.19              | 0.09              | 6.43                       | 0.28                   | 0.10                      |
| 3021M     | <i>Adnp<sup>+/+</sup></i> | Saline/DD | 0.16              | 0.09              | 5.21                       | 0.25                   | 0.09                      | 0.17              | 0.09              | 5.22                       | 0.26                   | 0.10                      | 0.17              | 0.09              | 5.23                       | 0.26                   | 0.09                      | 0.16              | 0.11              | 5.46                       | 0.26                   | 0.09                      |
| 2973M     | <i>Adnp<sup>+/+</sup></i> | Saline/DD | 0.19              | 0.10              | 5.88                       | 0.28                   | 0.11                      | 0.22              | 0.08              | 6.08                       | 0.28                   | 0.08                      | 0.19              | 0.11              | 5.88                       | 0.30                   | 0.10                      | 0.22              | 0.08              | 6.06                       | 0.29                   | 0.08                      |
| 2983M     | <i>Adnp<sup>+/+</sup></i> | Saline/DD | 0.21              | 0.10              | 5.30                       | 0.33                   | 0.10                      | 0.19              | 0.08              | 4.44                       | 0.28                   | 0.06                      | 0.16              | 0.09              | 4.35                       | 0.25                   | 0.07                      | 0.23              | 0.08              | 5.13                       | 0.31                   | 0.08                      |
| 2984M     | <i>Adnp<sup>+/+</sup></i> | Saline/DD | 0.11              | 0.08              | 6.80                       | 0.19                   | 0.08                      | 0.12              | 0.08              | 7.14                       | 0.19                   | 0.07                      | 0.11              | 0.09              | 7.61                       | 0.20                   | 0.09                      | 0.13              | 0.07              | 7.16                       | 0.19                   | 0.07                      |
| 2992M     | <i>Adnp<sup>+/+</sup></i> | Saline/DD | 0.26              | 0.14              | 5.34                       | 0.40                   | 0.14                      | 0.30              | 0.10              | 5.34                       | 0.40                   | 0.09                      | 0.27              | 0.15              | 5.47                       | 0.42                   | 0.14                      | 0.32              | 0.09              | 5.46                       | 0.42                   | 0.10                      |
| 2993M     | <i>Adnp<sup>+/+</sup></i> | Saline/DD | 0.15              | 0.09              | 5.77                       | 0.24                   | 0.12                      | 0.18              | 0.10              | 6.10                       | 0.27                   | 0.07                      | 0.12              | 0.12              | 5.73                       | 0.25                   | 0.09                      | 0.17              | 0.07              | 5.64                       | 0.25                   | 0.09                      |
| 2994M     | <i>Adnp<sup>+/+</sup></i> | Saline/DD | 0.17              | 0.12              | 6.66                       | 0.28                   | 0.11                      | 0.15              | 0.08              | 5.34                       | 0.23                   | 0.07                      | 0.16              | 0.11              | 6.06                       | 0.27                   | 0.11                      | 0.18              | 0.08              | 6.09                       | 0.27                   | 0.08                      |
| 2996M     | <i>Adnp<sup>+/+</sup></i> | Saline/DD | 0.17              | 0.10              | 5.45                       | 0.27                   | 0.10                      | 0.18              | 0.08              | 5.35                       | 0.23                   | 0.07                      | 0.18              | 0.12              | 6.27                       | 0.28                   | 0.12                      | 0.21              | 0.09              | 6.49                       | 0.30                   | 0.09                      |
| 3003M     | <i>Adnp<sup>+/+</sup></i> | Saline/DD | 0.23              | 0.10              | 5.15                       | 0.34                   | 0.10                      | 0.25              | 0.08              | 4.61                       | 0.30                   | 0.07                      | 0.22              | 0.12              | 5.42                       | 0.35                   | 0.10                      | 0.27              | 0.07              | 4.97                       | 0.34                   | 0.08                      |

| Mouse No. | Genotype                  | Treatment | RF Stand (s) Mean | RF Swing (s) Mean | RF Stride Length (cm) Mean | RF Step Cycle (s) Mean | RF Single Stance (s) Mean | RH Stand (s) Mean | RH Swing (s) Mean | RH Stride Length (cm) Mean | RH Step Cycle (s) Mean | RH Single Stance (s) Mean | LF Stand (s) Mean | LF Swing (s) Mean | LF Stride Length (cm) Mean | LF Step Cycle (s) Mean | LF Single Stance (s) Mean | LH Stand (s) Mean | LH Swing (s) Mean | LH Stride Length (cm) Mean | LH Step Cycle (s) Mean | LH Single Stance (s) Mean |
|-----------|---------------------------|-----------|-------------------|-------------------|----------------------------|------------------------|---------------------------|-------------------|-------------------|----------------------------|------------------------|---------------------------|-------------------|-------------------|----------------------------|------------------------|---------------------------|-------------------|-------------------|----------------------------|------------------------|---------------------------|
| 12S3 F    | <i>Adnp<sup>+/+</sup></i> | Saline/DD | 0.11              | 0.09              | 6.67                       | 0.20                   | 0.08                      | 0.10              | 0.07              | 5.18                       | 0.16                   | 0.05                      | 0.11              | 0.09              | 6.44                       | 0.19                   | 0.08                      | 0.14              | 0.07              | 6.58                       | 0.21                   | 0.09                      |
| 8S2 F     | <i>Adnp<sup>+/+</sup></i> | Saline/DD | 0.13              | 0.13              | 4.46                       | 0.27                   | 0.12                      | 0.09              | 0.13              | 3.59                       | 0.23                   | 0.06                      | 0.10              | 0.10              | 3.46                       | 0.21                   | 0.08                      | 0.11              | 0.11              | 3.73                       | 0.22                   | 0.08                      |
| 8S3 F     | <i>Adnp<sup>+/+</sup></i> | Saline/DD | 0.12              | 0.11              | 4.99                       | 0.23                   | 0.10                      | 0.13              | 0.12              | 5.07                       | 0.24                   | 0.11                      | 0.10              | 0.10              | 4.20                       | 0.21                   | 0.09                      | 0.11              | 0.12              | 4.71                       | 0.23                   | 0.09                      |
| 9S1 F     | <i>Adnp<sup>+/+</sup></i> | Saline/DD | 0.13              | 0.10              | 6.18                       | 0.23                   | 0.09                      | 0.16              | 0.10              | 6.54                       | 0.25                   | 0.09                      | 0.15              | 0.09              | 6.08                       | 0.24                   | 0.09                      | 0.12              | 0.08              | 4.96                       | 0.19                   | 0.07                      |
| 10S1 F    | <i>Adnp<sup>+/+</sup></i> | Saline/DD | 0.05              | 0.07              | 8.21                       | 0.12                   | 0.03                      | 0.05              | 0.06              | 7.64                       | 0.11                   | 0.04                      | 0.05              | 0.07              | 8.74                       | 0.12                   | 0.04                      | 0.06              | 0.06              | 7.48                       | 0.12                   | 0.04                      |
| 10S2 F    | <i>Adnp<sup>+/+</sup></i> | Saline/DD | 0.09              | 0.09              | 6.52                       | 0.18                   | 0.09                      | 0.08              | 0.09              | 6.20                       | 0.17                   | 0.07                      | 0.09              | 0.09              | 6.57                       | 0.19                   | 0.09                      | 0.09              | 0.08              | 6.06                       | 0.17                   | 0.08                      |
| 10S6 F    | <i>Adnp<sup>+/+</sup></i> | Saline/DD | 0.14              | 0.09              | 4.41                       | 0.23                   | 0.10                      | 0.12              | 0.11              | 4.41                       | 0.23                   | 0.11                      | 0.17              | 0.10              | 5.39                       | 0.28                   | 0.11                      | 0.10              | 0.16              | 5.14                       | 0.26                   | 0.06                      |
| 11S1 F    | <i>Adnp<sup>+/+</sup></i> | Saline/DD | 0.06              | 0.09              | 6.53                       | 0.15                   | 0.06                      | 0.06              | 0.08              | 6.11                       | 0.13                   | 0.05                      | 0.06              | 0.08              | 5.77                       | 0.13                   | 0.06                      | 0.07              | 0.07              | 5.83                       | 0.13                   | 0.07                      |
| 11S4 F    | <i>Adnp<sup>+/+</sup></i> | Saline/DD | 0.08              | 0.10              | 7.13                       | 0.18                   | 0.07                      | 0.10              | 0.06              | 6.46                       | 0.17                   | 0.07                      | 0.08              | 0.09              | 6.60                       | 0.17                   | 0.07                      | 0.09              | 0.08              | 6.18                       | 0.16                   | 0.05                      |
| 3309F     | <i>Adnp<sup>+/+</sup></i> | Saline/DD | 0.17              | 0.10              | 5.43                       | 0.25                   | 0.10                      | 0.11              | 0.11              | 4.29                       | 0.22                   | 0.07                      | 0.16              | 0.11              | 5.37                       | 0.25                   | 0.09                      | 0.18              | 0.08              | 5.07                       | 0.24                   | 0.13                      |
| 3323F     | <i>Adnp<sup>+/+</sup></i> | Saline/DD | 0.16              | 0.10              | 5.54                       | 0.25                   | 0.10                      | 0.15              | 0.09              | 5.02                       | 0.24                   | 0.08                      | 0.15              | 0.10              | 5.56                       | 0.25                   | 0.10                      | 0.17              | 0.08              | 5.19                       | 0.24                   | 0.09                      |
| 3327F     | <i>Adnp<sup>+/+</sup></i> | Saline/DD | 0.14              | 0.09              | 5.04                       | 0.23                   | 0.08                      | 0.15              | 0.07              | 4.65                       | 0.21                   | 0.06                      | 0.15              | 0.08              | 4.90                       | 0.23                   | 0.09                      | 0.15              | 0.07              | 4.68                       | 0.22                   | 0.07                      |
| 3329F     | <i>Adnp<sup>+/+</sup></i> | Saline/DD | 0.23              | 0.10              | 5.38                       | 0.33                   | 0.11                      | 0.15              | 0.11              | 4.23                       | 0.27                   | 0.08                      | 0.22              | 0.11              | 5.35                       | 0.34                   | 0.10                      | 0.19              | 0.09              | 4.43                       | 0.27                   | 0.11                      |
| 3055F     | <i>Adnp<sup>+/+</sup></i> | Saline/DD | 0.21              | 0.13              | 5.99                       | 0.36                   | 0.13                      | 0.17              | 0.11              | 4.88                       | 0.28                   | 0.09                      | 0.20              | 0.12              | 5.73                       | 0.33                   | 0.13                      | 0.19              | 0.11              | 5.46                       | 0.30                   | 0.11                      |
| 3066F     | <i>Adnp<sup>+/+</sup></i> | Saline/DD | 0.11              | 0.10              | 7.03                       | 0.20                   | 0.09                      | 0.11              | 0.07              | 6.12                       | 0.18                   | 0.08                      | 0.10              | 0.09              | 6.66                       | 0.20                   | 0.09                      | 0.10              | 0.08              | 6.23                       | 0.18                   | 0.07                      |
| 3070F     | <i>Adnp<sup>+/+</sup></i> | Saline/DD | 0.10              | 0.09              | 5.80                       | 0.19                   | 0.09                      | 0.10              | 0.10              | 5.34                       | 0.18                   | 0.07                      | 0.10              | 0.11              | 6.14                       | 0.21                   | 0.09                      | 0.11              | 0.10              | 6.13                       | 0.20                   | 0.09                      |
| 3071F     | <i>Adnp<sup>+/+</sup></i> | Saline/DD | 0.17              | 0.14              | 3.84                       | 0.32                   | 0.10                      | 0.26              | 0.11              | 4.00                       | 0.38                   | 0.09                      | 0.17              | 0.13              | 3.41                       | 0.29                   | 0.10                      | 0.30              | 0.11              | 4.02                       | 0.43                   | 0.12                      |
| 2963F     | <i>Adnp<sup>+/+</sup></i> | Saline/DD | 0.17              | 0.09              | 5.54                       | 0.27                   | 0.10                      | 0.19              | 0.08              | 5.11                       | 0.28                   | 0.09                      | 0.17              | 0.10              | 5.53                       | 0.26                   | 0.09                      | 0.18              | 0.08              | 5.11                       | 0.26                   | 0.08                      |
| 2968F     | <i>Adnp<sup>+/+</sup></i> | Saline/DD | 0.17              | 0.11              | 7.01                       | 0.26                   | 0.10                      | 0.15              | 0.16              | 8.58                       | 0.31                   | 0.09                      | 0.16              | 0.10              | 6.63                       | 0.26                   | 0.09                      | 0.17              | 0.09              | 6.61                       | 0.26                   | 0.10                      |
| 2977F     | <i>Adnp<sup>+/+</sup></i> | Saline/DD | 0.15              | 0.10              | 6.51                       | 0.26                   | 0.10                      | 0.16              | 0.08              | 6.29                       | 0.24                   | 0.08                      | 0.16              | 0.11              | 6.76                       | 0.26                   | 0.11                      | 0.17              | 0.09              | 6.75                       | 0.26                   | 0.09                      |
| 2981F     | <i>Adnp<sup>+/+</sup></i> | Saline/DD | 0.13              | 0.09              | 5.81                       | 0.25                   | 0.08                      | 0.10              | 0.07              | 3.82                       | 0.16                   | 0.05                      | 0.17              | 0.10              | 6.44                       | 0.28                   | 0.09                      | 0.16              | 0.09              | 6.51                       | 0.25                   | 0.13                      |
| 2990F     | <i>Adnp<sup>+/+</sup></i> | Saline/DD | 0.16              | 0.10              | 5.19                       | 0.26                   | 0.10                      | 0.19              | 0.09              | 5.98                       | 0.28                   | 0.09                      | 0.16              | 0.11              | 5.55                       | 0.26                   | 0.10                      | 0.18              | 0.09              | 5.64                       | 0.27                   | 0.08                      |
| 3001F     | <i>Adnp<sup>+/+</sup></i> | Saline/DD | 0.22              | 0.11              | 5.36                       | 0.33                   | 0.14                      | 0.16              | 0.10              | 4.01                       | 0.27                   | 0.09                      | 0.19              | 0.13              | 5.22                       | 0.32                   | 0.11                      | 0.18              | 0.12              | 4.73                       | 0.30                   | 0.10                      |
| 3002F     | <i>Adnp<sup>+/+</sup></i> | Saline/DD | 0.19              | 0.10              | 4.78                       | 0.29                   | 0.09                      | 0.16              | 0.10              | 4.51                       | 0.24                   | 0.08                      | 0.20              | 0.11              | 5.31                       | 0.33                   | 0.11                      | 0.21              | 0.12              | 5.56                       | 0.33                   | 0.11                      |
| 7N1 M     | <i>Adnp<sup>+/+</sup></i> | NAP       | 0.16              | 0.11              | 5.11                       | 0.27                   | 0.11                      | 0.18              | 0.11              | 5.39                       | 0.29                   | 0.11                      | 0.16              | 0.11              | 4.90                       | 0.27                   | 0.10                      | 0.14              | 0.10              | 4.48                       | 0.23                   | 0.09                      |
| 7N3 M     | <i>Adnp<sup>+/+</sup></i> | NAP       | 0.14              | 0.12              | 5.72                       | 0.26                   | 0.11                      | 0.15              | 0.08              | 5.17                       | 0.23                   | 0.07                      | 0.14              | 0.11              | 5.71                       | 0.25                   | 0.12                      | 0.16              | 0.08              | 5.45                       | 0.24                   | 0.08                      |
| 8N3 M     | <i>Adnp<sup>+/+</sup></i> | NAP       | 0.10              | 0.10              | 4.32                       | 0.19                   | 0.07                      | 0.12              | 0.08              | 5.17                       | 0.20                   | 0.08                      | 0.12              | 0.10              | 5.29                       | 0.24                   | 0.09                      | 0.11              | 0.11              | 4.71                       | 0.21                   | 0.08                      |

| Mouse No. | Genotype                  | Treatment | RF Stand (s) Mean | RF Swing (s) Mean | RF Stride Length (cm) Mean | RF Step Cycle (s) Mean | RF Single Stance (s) Mean | RH Stand (s) Mean | RH Swing (s) Mean | RH Stride Length (cm) Mean | RH Step Cycle (s) Mean | RH Single Stance (s) Mean | LF Stand (s) Mean | LF Swing (s) Mean | LF Stride Length (cm) Mean | LF Step Cycle (s) Mean | LF Single Stance (s) Mean | LH Stand (s) Mean | LH Swing (s) Mean | LH Stride Length (cm) Mean | LH Step Cycle (s) Mean | LH Single Stance (s) Mean |
|-----------|---------------------------|-----------|-------------------|-------------------|----------------------------|------------------------|---------------------------|-------------------|-------------------|----------------------------|------------------------|---------------------------|-------------------|-------------------|----------------------------|------------------------|---------------------------|-------------------|-------------------|----------------------------|------------------------|---------------------------|
| 9N3 M     | <i>Adnp<sup>+/+</sup></i> | NAP       | 0.14              | 0.10              | 6.46                       | 0.24                   | 0.09                      | 0.13              | 0.07              | 5.47                       | 0.19                   | 0.08                      | 0.14              | 0.09              | 6.45                       | 0.24                   | 0.10                      | 0.14              | 0.09              | 6.41                       | 0.24                   | 0.08                      |
| 9N4 M     | <i>Adnp<sup>+/+</sup></i> | NAP       | 0.11              | 0.10              | 6.75                       | 0.21                   | 0.08                      | 0.13              | 0.08              | 6.65                       | 0.22                   | 0.09                      | 0.13              | 0.13              | 7.96                       | 0.24                   | 0.09                      | 0.11              | 0.08              | 6.04                       | 0.20                   | 0.07                      |
| 10N1 M    | <i>Adnp<sup>+/+</sup></i> | NAP       | 0.09              | 0.11              | 4.40                       | 0.20                   | 0.08                      | 0.12              | 0.08              | 4.36                       | 0.22                   | 0.08                      | 0.10              | 0.11              | 4.16                       | 0.21                   | 0.12                      | 0.11              | 0.10              | 4.54                       | 0.22                   | 0.08                      |
| 11N5 M    | <i>Adnp<sup>+/+</sup></i> | NAP       | 0.13              | 0.09              | 5.97                       | 0.22                   | 0.08                      | 0.07              | 0.11              | 4.73                       | 0.18                   | 0.05                      | 0.12              | 0.09              | 5.85                       | 0.21                   | 0.07                      | 0.09              | 0.09              | 4.99                       | 0.18                   | 0.07                      |
| 3294M     | <i>Adnp<sup>+/+</sup></i> | NAP       | 0.12              | 0.09              | 5.91                       | 0.21                   | 0.09                      | 0.14              | 0.07              | 6.15                       | 0.21                   | 0.08                      | 0.13              | 0.10              | 6.12                       | 0.22                   | 0.09                      | 0.15              | 0.08              | 6.12                       | 0.22                   | 0.07                      |
| 3297M     | <i>Adnp<sup>+/+</sup></i> | NAP       | 0.12              | 0.09              | 5.03                       | 0.21                   | 0.09                      | 0.12              | 0.07              | 4.55                       | 0.19                   | 0.06                      | 0.12              | 0.09              | 5.00                       | 0.21                   | 0.09                      | 0.14              | 0.07              | 4.97                       | 0.21                   | 0.08                      |
| 3303M     | <i>Adnp<sup>+/+</sup></i> | NAP       | 0.15              | 0.11              | 5.56                       | 0.26                   | 0.11                      | 0.17              | 0.08              | 5.24                       | 0.25                   | 0.08                      | 0.14              | 0.10              | 5.30                       | 0.24                   | 0.10                      | 0.15              | 0.08              | 4.89                       | 0.24                   | 0.07                      |
| 3312M     | <i>Adnp<sup>+/+</sup></i> | NAP       | 0.15              | 0.09              | 4.65                       | 0.25                   | 0.08                      | 0.18              | 0.07              | 4.85                       | 0.26                   | 0.08                      | 0.18              | 0.10              | 5.23                       | 0.27                   | 0.10                      | 0.17              | 0.08              | 4.78                       | 0.25                   | 0.07                      |
| 3315M     | <i>Adnp<sup>+/+</sup></i> | NAP       | 0.17              | 0.11              | 6.22                       | 0.29                   | 0.10                      | 0.19              | 0.09              | 6.28                       | 0.28                   | 0.09                      | 0.17              | 0.10              | 6.18                       | 0.29                   | 0.11                      | 0.16              | 0.08              | 5.23                       | 0.23                   | 0.08                      |
| 3333M     | <i>Adnp<sup>+/+</sup></i> | NAP       | 0.24              | 0.10              | 4.67                       | 0.35                   | 0.11                      | 0.21              | 0.08              | 3.91                       | 0.30                   | 0.08                      | 0.24              | 0.11              | 4.59                       | 0.36                   | 0.10                      | 0.25              | 0.08              | 4.88                       | 0.34                   | 0.08                      |
| 3053M     | <i>Adnp<sup>+/+</sup></i> | NAP       | 0.22              | 0.13              | 6.34                       | 0.35                   | 0.12                      | 0.17              | 0.15              | 6.04                       | 0.31                   | 0.12                      | 0.19              | 0.10              | 5.56                       | 0.29                   | 0.11                      | 0.20              | 0.14              | 6.27                       | 0.33                   | 0.15                      |
| 3073M     | <i>Adnp<sup>+/+</sup></i> | NAP       | 0.13              | 0.10              | 5.52                       | 0.23                   | 0.09                      | 0.15              | 0.07              | 5.51                       | 0.22                   | 0.07                      | 0.13              | 0.10              | 5.78                       | 0.24                   | 0.10                      | 0.16              | 0.07              | 5.87                       | 0.24                   | 0.08                      |
| 3147M     | <i>Adnp<sup>+/+</sup></i> | NAP       | 0.19              | 0.10              | 5.39                       | 0.30                   | 0.10                      | 0.25              | 0.09              | 6.09                       | 0.34                   | 0.10                      | 0.18              | 0.10              | 5.20                       | 0.28                   | 0.10                      | 0.19              | 0.08              | 5.03                       | 0.28                   | 0.07                      |
| 2971M     | <i>Adnp<sup>+/+</sup></i> | NAP       | 0.19              | 0.11              | 5.81                       | 0.30                   | 0.11                      | 0.20              | 0.08              | 5.14                       | 0.27                   | 0.08                      | 0.19              | 0.10              | 5.57                       | 0.29                   | 0.10                      | 0.20              | 0.07              | 4.99                       | 0.28                   | 0.08                      |
| 2972M     | <i>Adnp<sup>+/+</sup></i> | NAP       | 0.20              | 0.11              | 6.09                       | 0.31                   | 0.14                      | 0.22              | 0.09              | 6.02                       | 0.31                   | 0.09                      | 0.17              | 0.13              | 5.81                       | 0.31                   | 0.10                      | 0.22              | 0.09              | 5.87                       | 0.31                   | 0.08                      |
| 2986M     | <i>Adnp<sup>+/+</sup></i> | NAP       | 0.17              | 0.10              | 4.53                       | 0.26                   | 0.09                      | 0.19              | 0.08              | 5.10                       | 0.27                   | 0.09                      | 0.15              | 0.09              | 4.24                       | 0.24                   | 0.08                      | 0.18              | 0.10              | 5.70                       | 0.29                   | 0.06                      |
| 3005M     | <i>Adnp<sup>+/+</sup></i> | NAP       | 0.21              | 0.11              | 6.35                       | 0.30                   | 0.12                      | 0.22              | 0.09              | 5.97                       | 0.32                   | 0.10                      | 0.18              | 0.12              | 6.38                       | 0.30                   | 0.10                      | 0.20              | 0.11              | 6.27                       | 0.31                   | 0.09                      |
| 12N1 F    | <i>Adnp<sup>+/+</sup></i> | NAP       | 0.15              | 0.10              | 5.35                       | 0.25                   | 0.10                      | 0.20              | 0.07              | 5.56                       | 0.28                   | 0.07                      | 0.14              | 0.11              | 5.45                       | 0.25                   | 0.09                      | 0.20              | 0.07              | 5.69                       | 0.28                   | 0.07                      |
| 12N3 F    | <i>Adnp<sup>+/+</sup></i> | NAP       | 0.19              | 0.11              | 5.52                       | 0.32                   | 0.12                      | 0.20              | 0.10              | 5.30                       | 0.32                   | 0.08                      | 0.20              | 0.13              | 5.56                       | 0.33                   | 0.11                      | 0.23              | 0.09              | 5.22                       | 0.32                   | 0.10                      |
| 8N1 F     | <i>Adnp<sup>+/+</sup></i> | NAP       | 0.10              | 0.11              | 5.21                       | 0.20                   | 0.09                      | 0.11              | 0.09              | 5.28                       | 0.20                   | 0.07                      | 0.10              | 0.11              | 5.53                       | 0.21                   | 0.10                      | 0.13              | 0.08              | 5.23                       | 0.20                   | 0.09                      |
| 9N5 F     | <i>Adnp<sup>+/+</sup></i> | NAP       | 0.05              | 0.07              | 9.28                       | 0.12                   | 0.05                      | 0.06              | 0.06              | 9.32                       | 0.12                   | 0.06                      | 0.05              | 0.07              | 8.83                       | 0.12                   | 0.05                      | 0.06              | 0.07              | 8.57                       | 0.13                   | 0.05                      |
| 10N6 F    | <i>Adnp<sup>+/+</sup></i> | NAP       | 0.08              | 0.07              | 6.78                       | 0.15                   | 0.07                      | 0.07              | 0.06              | 6.01                       | 0.13                   | 0.06                      | 0.07              | 0.07              | 6.61                       | 0.14                   | 0.07                      | 0.09              | 0.06              | 7.00                       | 0.15                   | 0.07                      |
| 11N1 F    | <i>Adnp<sup>+/+</sup></i> | NAP       | 0.06              | 0.08              | 6.91                       | 0.14                   | 0.05                      | 0.07              | 0.06              | 6.51                       | 0.13                   | 0.05                      | 0.06              | 0.07              | 6.56                       | 0.13                   | 0.06                      | 0.07              | 0.07              | 6.75                       | 0.14                   | 0.05                      |
| 11N2 F    | <i>Adnp<sup>+/+</sup></i> | NAP       | 0.15              | 0.13              | 6.23                       | 0.29                   | 0.12                      | 0.10              | 0.10              | 4.04                       | 0.20                   | 0.07                      | 0.14              | 0.12              | 5.37                       | 0.27                   | 0.11                      | 0.19              | 0.10              | 5.37                       | 0.31                   | 0.12                      |
| 3302F     | <i>Adnp<sup>+/+</sup></i> | NAP       | 0.24              | 0.12              | 5.00                       | 0.37                   | 0.13                      | 0.12              | 0.11              | 3.32                       | 0.24                   | 0.12                      | 0.24              | 0.13              | 5.01                       | 0.38                   | 0.12                      | 0.07              | 0.25              | 5.22                       | 0.32                   | 0.04                      |
| 3304F     | <i>Adnp<sup>+/+</sup></i> | NAP       | 0.08              | 0.08              | 6.63                       | 0.16                   | 0.07                      | 0.08              | 0.06              | 6.22                       | 0.15                   | 0.06                      | 0.08              | 0.08              | 6.68                       | 0.16                   | 0.07                      | 0.09              | 0.06              | 6.27                       | 0.15                   | 0.06                      |
| 3306F     | <i>Adnp<sup>+/+</sup></i> | NAP       | 0.10              | 0.09              | 4.90                       | 0.20                   | 0.07                      | 0.10              | 0.09              | 4.33                       | 0.18                   | 0.07                      | 0.11              | 0.09              | 5.20                       | 0.20                   | 0.08                      | 0.09              | 0.09              | 4.67                       | 0.18                   | 0.08                      |

| Mouse No. | Genotype                   | Treatment | RF Stand (s) Mean | RF Swing (s) Mean | RF Stride Length (cm) Mean | RF Step Cycle (s) Mean | RF Single Stance (s) Mean | RH Stand (s) Mean | RH Swing (s) Mean | RH Stride Length (cm) Mean | RH Step Cycle (s) Mean | RH Single Stance (s) Mean | LF Stand (s) Mean | LF Swing (s) Mean | LF Stride Length (cm) Mean | LF Step Cycle (s) Mean | LF Single Stance (s) Mean | LH Stand (s) Mean | LH Swing (s) Mean | LH Stride Length (cm) Mean | LH Step Cycle (s) Mean | LH Single Stance (s) Mean |
|-----------|----------------------------|-----------|-------------------|-------------------|----------------------------|------------------------|---------------------------|-------------------|-------------------|----------------------------|------------------------|---------------------------|-------------------|-------------------|----------------------------|------------------------|---------------------------|-------------------|-------------------|----------------------------|------------------------|---------------------------|
| 3313F     | <i>Adnp</i> <sup>+/+</sup> | NAP       | 0.19              | 0.10              | 4.35                       | 0.28                   | 0.11                      | 0.23              | 0.09              | 4.90                       | 0.33                   | 0.11                      | 0.21              | 0.13              | 5.16                       | 0.34                   | 0.12                      | 0.18              | 0.09              | 4.29                       | 0.26                   | 0.08                      |
| 3318F     | <i>Adnp</i> <sup>+/+</sup> | NAP       | 0.24              | 0.12              | 4.95                       | 0.37                   | 0.12                      | 0.26              | 0.10              | 4.77                       | 0.37                   | 0.11                      | 0.22              | 0.11              | 4.53                       | 0.33                   | 0.11                      | 0.18              | 0.08              | 3.38                       | 0.25                   | 0.07                      |
| 3319F     | <i>Adnp</i> <sup>+/+</sup> | NAP       | 0.11              | 0.11              | 6.03                       | 0.22                   | 0.09                      | 0.11              | 0.09              | 5.43                       | 0.20                   | 0.08                      | 0.13              | 0.10              | 6.04                       | 0.22                   | 0.11                      | 0.13              | 0.08              | 5.99                       | 0.22                   | 0.09                      |
| 3331F     | <i>Adnp</i> <sup>+/+</sup> | NAP       | 0.20              | 0.11              | 4.70                       | 0.31                   | 0.11                      | 0.20              | 0.08              | 4.65                       | 0.27                   | 0.08                      | 0.18              | 0.11              | 4.69                       | 0.29                   | 0.09                      | 0.21              | 0.08              | 4.30                       | 0.29                   | 0.07                      |
| 3332F     | <i>Adnp</i> <sup>+/+</sup> | NAP       | 0.18              | 0.11              | 5.00                       | 0.30                   | 0.11                      | 0.21              | 0.08              | 4.74                       | 0.29                   | 0.08                      | 0.18              | 0.10              | 4.84                       | 0.29                   | 0.11                      | 0.19              | 0.08              | 4.37                       | 0.27                   | 0.08                      |
| 3018F     | <i>Adnp</i> <sup>+/+</sup> | NAP       | 0.14              | 0.11              | 5.33                       | 0.24                   | 0.10                      | 0.19              | 0.07              | 5.46                       | 0.26                   | 0.11                      | 0.16              | 0.10              | 5.61                       | 0.26                   | 0.11                      | 0.12              | 0.08              | 4.07                       | 0.20                   | 0.05                      |
| 3025F     | <i>Adnp</i> <sup>+/+</sup> | NAP       | 0.25              | 0.11              | 5.33                       | 0.34                   | 0.11                      | 0.18              | 0.14              | 4.69                       | 0.33                   | 0.08                      | 0.23              | 0.11              | 5.43                       | 0.34                   | 0.11                      | 0.25              | 0.09              | 5.07                       | 0.35                   | 0.15                      |
| 3054F     | <i>Adnp</i> <sup>+/+</sup> | NAP       | 0.13              | 0.10              | 6.53                       | 0.23                   | 0.10                      | 0.13              | 0.08              | 6.11                       | 0.21                   | 0.07                      | 0.13              | 0.10              | 6.48                       | 0.23                   | 0.10                      | 0.15              | 0.08              | 6.50                       | 0.23                   | 0.09                      |
| 3068F     | <i>Adnp</i> <sup>+/+</sup> | NAP       | 0.22              | 0.14              | 5.23                       | 0.35                   | 0.14                      | 0.18              | 0.18              | 4.97                       | 0.36                   | 0.11                      | 0.17              | 0.11              | 4.09                       | 0.28                   | 0.11                      | 0.21              | 0.10              | 4.24                       | 0.31                   | 0.15                      |
| 2966F     | <i>Adnp</i> <sup>+/+</sup> | NAP       | 0.11              | 0.10              | 7.28                       | 0.21                   | 0.09                      | 0.14              | 0.09              | 7.22                       | 0.21                   | 0.08                      | 0.12              | 0.10              | 7.15                       | 0.21                   | 0.10                      | 0.14              | 0.08              | 7.10                       | 0.22                   | 0.09                      |
| 2975F     | <i>Adnp</i> <sup>+/+</sup> | NAP       | 0.21              | 0.13              | 5.78                       | 0.35                   | 0.14                      | 0.24              | 0.10              | 5.36                       | 0.34                   | 0.09                      | 0.19              | 0.13              | 5.39                       | 0.33                   | 0.12                      | 0.27              | 0.10              | 6.00                       | 0.38                   | 0.11                      |
| 2980F     | <i>Adnp</i> <sup>+/+</sup> | NAP       | 0.17              | 0.10              | 5.87                       | 0.28                   | 0.11                      | 0.19              | 0.10              | 5.77                       | 0.28                   | 0.09                      | 0.16              | 0.11              | 5.97                       | 0.27                   | 0.10                      | 0.20              | 0.09              | 6.07                       | 0.29                   | 0.10                      |
| 2988F     | <i>Adnp</i> <sup>+/+</sup> | NAP       | 0.20              | 0.11              | 5.36                       | 0.30                   | 0.12                      | 0.23              | 0.08              | 4.84                       | 0.30                   | 0.09                      | 0.20              | 0.12              | 5.27                       | 0.32                   | 0.11                      | 0.20              | 0.09              | 4.29                       | 0.28                   | 0.07                      |
| 2991F     | <i>Adnp</i> <sup>+/+</sup> | NAP       | 0.12              | 0.09              | 5.34                       | 0.22                   | 0.08                      | 0.12              | 0.11              | 5.30                       | 0.22                   | 0.06                      | 0.14              | 0.09              | 5.38                       | 0.23                   | 0.09                      | 0.17              | 0.09              | 5.88                       | 0.25                   | 0.10                      |
| 2999F     | <i>Adnp</i> <sup>+/+</sup> | NAP       | 0.21              | 0.11              | 4.85                       | 0.33                   | 0.10                      | 0.22              | 0.10              | 4.73                       | 0.31                   | 0.10                      | 0.21              | 0.10              | 4.57                       | 0.32                   | 0.12                      | 0.23              | 0.11              | 4.85                       | 0.34                   | 0.10                      |
| 8S4       | <i>Adnp</i> <sup>+/+</sup> | Saline/DD | 0.10              | 0.10              | 4.76                       | 0.20                   | 0.09                      | 0.09              | 0.10              | 4.43                       | 0.18                   | 0.06                      | 0.09              | 0.11              | 5.05                       | 0.21                   | 0.10                      | 0.12              | 0.07              | 4.78                       | 0.20                   | 0.09                      |
| 9S2       | <i>Adnp</i> <sup>+/+</sup> | Saline/DD | 0.18              | 0.08              | 5.73                       | 0.28                   | 0.09                      | 0.14              | 0.08              | 4.88                       | 0.23                   | 0.07                      | 0.18              | 0.09              | 5.45                       | 0.27                   | 0.07                      | 0.15              | 0.09              | 4.84                       | 0.24                   | 0.08                      |
| 9S3       | <i>Adnp</i> <sup>+/+</sup> | Saline/DD | 0.06              | 0.08              | 7.28                       | 0.15                   | 0.07                      | 0.08              | 0.06              | 6.75                       | 0.13                   | 0.05                      | 0.07              | 0.08              | 7.09                       | 0.15                   | 0.06                      | 0.08              | 0.06              | 6.45                       | 0.14                   | 0.05                      |
| 9S4       | <i>Adnp</i> <sup>+/+</sup> | Saline/DD | 0.07              | 0.09              | 7.09                       | 0.16                   | 0.06                      | 0.09              | 0.06              | 6.59                       | 0.15                   | 0.06                      | 0.08              | 0.06              | 6.23                       | 0.13                   | 0.07                      | 0.08              | 0.05              | 5.63                       | 0.13                   | 0.05                      |
| 10S4      | <i>Adnp</i> <sup>+/+</sup> | Saline/DD | 0.10              | 0.08              | 4.93                       | 0.19                   | 0.09                      | 0.13              | 0.07              | 5.34                       | 0.20                   | 0.07                      | 0.10              | 0.08              | 4.62                       | 0.18                   | 0.08                      | 0.13              | 0.07              | 5.28                       | 0.20                   | 0.07                      |
| 11S2      | <i>Adnp</i> <sup>+/+</sup> | Saline/DD | 0.17              | 0.10              | 4.50                       | 0.27                   | 0.11                      | 0.18              | 0.08              | 4.48                       | 0.27                   | 0.10                      | 0.16              | 0.11              | 4.47                       | 0.27                   | 0.10                      | 0.16              | 0.09              | 4.31                       | 0.26                   | 0.08                      |
| 3298M     | <i>Adnp</i> <sup>+/+</sup> | Saline/DD | 0.06              | 0.06              | 6.84                       | 0.13                   | 0.06                      | 0.07              | 0.06              | 7.07                       | 0.13                   | 0.06                      | 0.06              | 0.08              | 7.32                       | 0.14                   | 0.06                      | 0.07              | 0.06              | 6.87                       | 0.13                   | 0.06                      |
| 3301M     | <i>Adnp</i> <sup>+/+</sup> | Saline/DD | 0.09              | 0.08              | 4.51                       | 0.17                   | 0.08                      | 0.11              | 0.06              | 4.44                       | 0.16                   | 0.06                      | 0.09              | 0.08              | 4.83                       | 0.17                   | 0.07                      | 0.13              | 0.07              | 5.09                       | 0.19                   | 0.07                      |
| 3305M     | <i>Adnp</i> <sup>+/+</sup> | Saline/DD | 0.10              | 0.08              | 5.67                       | 0.18                   | 0.08                      | 0.10              | 0.07              | 5.57                       | 0.18                   | 0.06                      | 0.09              | 0.10              | 6.12                       | 0.20                   | 0.06                      | 0.10              | 0.08              | 5.93                       | 0.19                   | 0.06                      |
| 3311M     | <i>Adnp</i> <sup>+/+</sup> | Saline/DD | 0.18              | 0.12              | 4.57                       | 0.30                   | 0.11                      | 0.13              | 0.10              | 3.47                       | 0.24                   | 0.09                      | 0.18              | 0.11              | 4.63                       | 0.30                   | 0.11                      | 0.12              | 0.09              | 3.18                       | 0.21                   | 0.08                      |
| 3330M     | <i>Adnp</i> <sup>+/+</sup> | Saline/DD | 0.10              | 0.08              | 5.13                       | 0.18                   | 0.08                      | 0.11              | 0.06              | 4.69                       | 0.16                   | 0.06                      | 0.10              | 0.08              | 5.15                       | 0.18                   | 0.08                      | 0.12              | 0.06              | 5.14                       | 0.18                   | 0.07                      |
| 3336M     | <i>Adnp</i> <sup>+/+</sup> | Saline/DD | 0.16              | 0.10              | 4.76                       | 0.27                   | 0.09                      | 0.17              | 0.07              | 4.31                       | 0.24                   | 0.06                      | 0.16              | 0.09              | 4.59                       | 0.25                   | 0.10                      | 0.18              | 0.07              | 4.49                       | 0.25                   | 0.08                      |

| Mouse No. | Genotype                   | Treatment | RF Stand (s) Mean | RF Swing (s) Mean | RF Stride Length (cm) Mean | RF Step Cycle (s) Mean | RF Single Stance (s) Mean | RH Stand (s) Mean | RH Swing (s) Mean | RH Stride Length (cm) Mean | RH Step Cycle (s) Mean | RH Single Stance (s) Mean | LF Stand (s) Mean | LF Swing (s) Mean | LF Stride Length (cm) Mean | LF Step Cycle (s) Mean | LF Single Stance (s) Mean | LH Stand (s) Mean | LH Swing (s) Mean | LH Stride Length (cm) Mean | LH Step Cycle (s) Mean | LH Single Stance (s) Mean |
|-----------|----------------------------|-----------|-------------------|-------------------|----------------------------|------------------------|---------------------------|-------------------|-------------------|----------------------------|------------------------|---------------------------|-------------------|-------------------|----------------------------|------------------------|---------------------------|-------------------|-------------------|----------------------------|------------------------|---------------------------|
| 3056M     | <i>Adnp</i> <sup>+/+</sup> | Saline/DD | 0.25              | 0.09              | 4.86                       | 0.36                   | 0.10                      | 0.24              | 0.07              | 4.98                       | 0.29                   | 0.08                      | 0.22              | 0.10              | 4.30                       | 0.31                   | 0.09                      | 0.16              | 0.06              | 3.61                       | 0.22                   | 0.05                      |
| 3069M     | <i>Adnp</i> <sup>+/+</sup> | Saline/DD | 0.18              | 0.09              | 4.54                       | 0.28                   | 0.10                      | 0.20              | 0.09              | 4.64                       | 0.29                   | 0.09                      | 0.18              | 0.10              | 4.52                       | 0.28                   | 0.09                      | 0.17              | 0.08              | 3.95                       | 0.25                   | 0.08                      |
| 2969M     | <i>Adnp</i> <sup>+/+</sup> | Saline/DD | 0.16              | 0.10              | 5.18                       | 0.26                   | 0.09                      | 0.17              | 0.07              | 4.51                       | 0.24                   | 0.06                      | 0.17              | 0.09              | 5.19                       | 0.26                   | 0.10                      | 0.20              | 0.07              | 4.99                       | 0.27                   | 0.08                      |
| 2970M     | <i>Adnp</i> <sup>+/+</sup> | Saline/DD | 0.14              | 0.10              | 5.52                       | 0.24                   | 0.10                      | 0.17              | 0.07              | 5.57                       | 0.24                   | 0.08                      | 0.14              | 0.10              | 5.54                       | 0.24                   | 0.10                      | 0.14              | 0.07              | 4.84                       | 0.21                   | 0.06                      |
| 2985M     | <i>Adnp</i> <sup>+/+</sup> | Saline/DD | 0.06              | 0.08              | 4.33                       | 0.15                   | 0.04                      | 0.09              | 0.07              | 5.09                       | 0.16                   | 0.05                      | 0.07              | 0.09              | 4.64                       | 0.17                   | 0.05                      | 0.09              | 0.08              | 4.84                       | 0.16                   | 0.05                      |
| 3004M     | <i>Adnp</i> <sup>+/+</sup> | Saline/DD | 0.11              | 0.14              | 4.30                       | 0.25                   | 0.07                      | 0.11              | 0.10              | 3.87                       | 0.20                   | 0.05                      | 0.09              | 0.13              | 3.92                       | 0.21                   | 0.05                      | 0.11              | 0.10              | 3.76                       | 0.20                   | 0.05                      |
| 12S4 F    | <i>Adnp</i> <sup>+/+</sup> | Saline/DD | 0.20              | 0.10              | 4.51                       | 0.28                   | 0.09                      | 0.28              | 0.07              | 4.53                       | 0.33                   | 0.07                      | 0.21              | 0.09              | 4.78                       | 0.30                   | 0.10                      | 0.21              | 0.06              | 3.57                       | 0.27                   | 0.05                      |
| 8S5 F     | <i>Adnp</i> <sup>+/+</sup> | Saline/DD | 0.15              | 0.09              | 4.04                       | 0.24                   | 0.09                      | 0.15              | 0.11              | 4.31                       | 0.26                   | 0.09                      | 0.15              | 0.10              | 4.23                       | 0.25                   | 0.09                      | 0.16              | 0.09              | 4.21                       | 0.25                   | 0.10                      |
| 10S3      | <i>Adnp</i> <sup>+/+</sup> | Saline/DD | 0.09              | 0.08              | 6.20                       | 0.17                   | 0.07                      | 0.09              | 0.06              | 5.66                       | 0.15                   | 0.06                      | 0.08              | 0.07              | 5.83                       | 0.16                   | 0.07                      | 0.09              | 0.06              | 5.62                       | 0.15                   | 0.06                      |
| 10S5      | <i>Adnp</i> <sup>+/+</sup> | Saline/DD | 0.07              | 0.08              | 5.18                       | 0.15                   | 0.06                      | 0.08              | 0.09              | 5.59                       | 0.17                   | 0.07                      | 0.06              | 0.08              | 5.61                       | 0.15                   | 0.06                      | 0.06              | 0.07              | 4.95                       | 0.13                   | 0.06                      |
| 3314F     | <i>Adnp</i> <sup>+/+</sup> | Saline/DD | 0.15              | 0.09              | 4.73                       | 0.25                   | 0.10                      | 0.11              | 0.07              | 3.33                       | 0.18                   | 0.07                      | 0.15              | 0.10              | 4.70                       | 0.25                   | 0.09                      | 0.15              | 0.09              | 4.49                       | 0.24                   | 0.10                      |
| 3321F     | <i>Adnp</i> <sup>+/+</sup> | Saline/DD | 0.19              | 0.10              | 5.19                       | 0.29                   | 0.11                      | 0.14              | 0.09              | 4.01                       | 0.22                   | 0.07                      | 0.18              | 0.11              | 5.17                       | 0.29                   | 0.10                      | 0.15              | 0.07              | 3.76                       | 0.23                   | 0.08                      |
| 3023F     | <i>Adnp</i> <sup>+/+</sup> | Saline/DD | 0.17              | 0.10              | 5.64                       | 0.26                   | 0.11                      | 0.15              | 0.09              | 5.09                       | 0.24                   | 0.09                      | 0.15              | 0.10              | 5.30                       | 0.26                   | 0.09                      | 0.16              | 0.10              | 5.33                       | 0.25                   | 0.09                      |
| 3024F     | <i>Adnp</i> <sup>+/+</sup> | Saline/DD | 0.18              | 0.10              | 4.37                       | 0.29                   | 0.09                      | 0.12              | 0.08              | 2.92                       | 0.20                   | 0.05                      | 0.18              | 0.10              | 4.36                       | 0.28                   | 0.10                      | 0.20              | 0.10              | 4.34                       | 0.31                   | 0.11                      |
| 3074F     | <i>Adnp</i> <sup>+/+</sup> | Saline/DD | 0.14              | 0.10              | 4.49                       | 0.25                   | 0.09                      | 0.19              | 0.08              | 4.96                       | 0.27                   | 0.08                      | 0.16              | 0.10              | 4.74                       | 0.26                   | 0.10                      | 0.16              | 0.08              | 4.79                       | 0.24                   | 0.07                      |
| 3146F     | <i>Adnp</i> <sup>+/+</sup> | Saline/DD | 0.19              | 0.12              | 5.38                       | 0.31                   | 0.11                      | 0.20              | 0.09              | 4.76                       | 0.29                   | 0.11                      | 0.20              | 0.11              | 5.38                       | 0.31                   | 0.12                      | 0.18              | 0.10              | 4.60                       | 0.28                   | 0.09                      |
| 2974F     | <i>Adnp</i> <sup>+/+</sup> | Saline/DD | 0.17              | 0.11              | 4.76                       | 0.27                   | 0.09                      | 0.19              | 0.08              | 4.82                       | 0.27                   | 0.07                      | 0.17              | 0.09              | 4.52                       | 0.27                   | 0.10                      | 0.20              | 0.08              | 4.93                       | 0.28                   | 0.08                      |
| 12N4 M    | <i>Adnp</i> <sup>+/+</sup> | NAP       | 0.08              | 0.07              | 6.93                       | 0.16                   | 0.06                      | 0.10              | 0.06              | 6.94                       | 0.17                   | 0.05                      | 0.08              | 0.08              | 7.70                       | 0.16                   | 0.06                      | 0.11              | 0.05              | 7.05                       | 0.18                   | 0.06                      |
| 12N5 M    | <i>Adnp</i> <sup>+/+</sup> | NAP       | 0.13              | 0.08              | 4.89                       | 0.22                   | 0.09                      | 0.18              | 0.06              | 5.35                       | 0.25                   | 0.08                      | 0.13              | 0.09              | 4.91                       | 0.22                   | 0.08                      | 0.16              | 0.07              | 5.08                       | 0.23                   | 0.06                      |
| 7N2 M     | <i>Adnp</i> <sup>+/+</sup> | NAP       | 0.14              | 0.09              | 4.95                       | 0.24                   | 0.10                      | 0.14              | 0.08              | 4.54                       | 0.22                   | 0.08                      | 0.12              | 0.10              | 4.35                       | 0.22                   | 0.09                      | 0.13              | 0.08              | 4.36                       | 0.21                   | 0.07                      |
| 8N4 M     | <i>Adnp</i> <sup>+/+</sup> | NAP       | 0.15              | 0.15              | 3.95                       | 0.31                   | 0.09                      | 0.15              | 0.12              | 3.31                       | 0.28                   | 0.04                      | 0.14              | 0.13              | 3.64                       | 0.28                   | 0.08                      | 0.23              | 0.06              | 3.66                       | 0.30                   | 0.11                      |
| 8N5 M     | <i>Adnp</i> <sup>+/+</sup> | NAP       | 0.15              | 0.10              | 4.62                       | 0.26                   | 0.10                      | 0.14              | 0.10              | 4.11                       | 0.23                   | 0.09                      | 0.14              | 0.11              | 4.60                       | 0.26                   | 0.10                      | 0.12              | 0.09              | 3.63                       | 0.21                   | 0.08                      |
| 9N2 M     | <i>Adnp</i> <sup>+/+</sup> | NAP       | 0.11              | 0.07              | 5.47                       | 0.18                   | 0.06                      | 0.12              | 0.06              | 5.55                       | 0.18                   | 0.05                      | 0.11              | 0.07              | 5.59                       | 0.18                   | 0.07                      | 0.11              | 0.06              | 5.10                       | 0.17                   | 0.05                      |
| 10N4 M    | <i>Adnp</i> <sup>+/+</sup> | NAP       | 0.17              | 0.10              | 3.87                       | 0.28                   | 0.09                      | 0.13              | 0.10              | 3.16                       | 0.23                   | 0.08                      | 0.21              | 0.12              | 4.83                       | 0.31                   | 0.12                      | 0.14              | 0.13              | 3.96                       | 0.28                   | 0.09                      |
| 3300M     | <i>Adnp</i> <sup>+/+</sup> | NAP       | 0.11              | 0.09              | 4.26                       | 0.20                   | 0.09                      | 0.14              | 0.08              | 4.53                       | 0.22                   | 0.08                      | 0.12              | 0.10              | 4.74                       | 0.23                   | 0.08                      | 0.12              | 0.08              | 4.77                       | 0.20                   | 0.07                      |
| 3316M     | <i>Adnp</i> <sup>+/+</sup> | NAP       | 0.20              | 0.09              | 4.46                       | 0.30                   | 0.08                      | 0.21              | 0.07              | 4.43                       | 0.28                   | 0.08                      | 0.20              | 0.08              | 4.41                       | 0.29                   | 0.09                      | 0.15              | 0.06              | 3.29                       | 0.21                   | 0.05                      |
| 3328M     | <i>Adnp</i> <sup>+/+</sup> | NAP       | 0.15              | 0.09              | 4.62                       | 0.25                   | 0.07                      | 0.18              | 0.06              | 4.71                       | 0.26                   | 0.08                      | 0.15              | 0.07              | 4.16                       | 0.22                   | 0.08                      | 0.14              | 0.07              | 4.07                       | 0.22                   | 0.05                      |

| Mouse No. | Genotype                   | Treatment | RF Stand (s) Mean | RF Swing (s) Mean | RF Stride Length (cm) Mean | RF Step Cycle (s) Mean | RF Single Stance (s) Mean | RH Stand (s) Mean | RH Swing (s) Mean | RH Stride Length (cm) Mean | RH Step Cycle (s) Mean | RH Single Stance (s) Mean | LF Stand (s) Mean | LF Swing (s) Mean | LF Stride Length (cm) Mean | LF Step Cycle (s) Mean | LF Single Stance (s) Mean | LH Stand (s) Mean | LH Swing (s) Mean | LH Stride Length (cm) Mean | LH Step Cycle (s) Mean | LH Single Stance (s) Mean |
|-----------|----------------------------|-----------|-------------------|-------------------|----------------------------|------------------------|---------------------------|-------------------|-------------------|----------------------------|------------------------|---------------------------|-------------------|-------------------|----------------------------|------------------------|---------------------------|-------------------|-------------------|----------------------------|------------------------|---------------------------|
| 3022M     | <i>Adnp</i> <sup>+/+</sup> | NAP       | 0.19              | 0.09              | 4.52                       | 0.28                   | 0.09                      | 0.21              | 0.07              | 4.27                       | 0.27                   | 0.07                      | 0.19              | 0.09              | 4.56                       | 0.28                   | 0.09                      | 0.22              | 0.08              | 4.77                       | 0.30                   | 0.07                      |
| 3017M     | <i>Adnp</i> <sup>+/+</sup> | NAP       | 0.21              | 0.11              | 5.69                       | 0.33                   | 0.10                      | 0.20              | 0.08              | 4.98                       | 0.29                   | 0.06                      | 0.20              | 0.09              | 5.35                       | 0.30                   | 0.10                      | 0.21              | 0.07              | 4.99                       | 0.28                   | 0.08                      |
| 3065M     | <i>Adnp</i> <sup>+/+</sup> | NAP       | 0.17              | 0.09              | 3.68                       | 0.27                   | 0.10                      | 0.17              | 0.07              | 3.33                       | 0.24                   | 0.07                      | 0.19              | 0.11              | 4.12                       | 0.30                   | 0.10                      | 0.21              | 0.08              | 3.87                       | 0.30                   | 0.08                      |
| 3067M     | <i>Adnp</i> <sup>+/+</sup> | NAP       | 0.19              | 0.11              | 4.82                       | 0.30                   | 0.10                      | 0.23              | 0.08              | 4.91                       | 0.30                   | 0.11                      | 0.19              | 0.11              | 5.01                       | 0.29                   | 0.11                      | 0.18              | 0.10              | 4.56                       | 0.28                   | 0.07                      |
| 2982M     | <i>Adnp</i> <sup>+/+</sup> | NAP       | 0.07              | 0.12              | 3.67                       | 0.18                   | 0.04                      | 0.15              | 0.11              | 5.06                       | 0.25                   | 0.09                      | 0.06              | 0.09              | 2.97                       | 0.14                   | 0.04                      | 0.10              | 0.11              | 4.19                       | 0.20                   | 0.04                      |
| 2995M     | <i>Adnp</i> <sup>+/+</sup> | NAP       | 0.21              | 0.12              | 6.00                       | 0.33                   | 0.11                      | 0.19              | 0.10              | 5.06                       | 0.29                   | 0.09                      | 0.22              | 0.12              | 6.20                       | 0.34                   | 0.12                      | 0.17              | 0.09              | 4.64                       | 0.25                   | 0.08                      |
| 12N2 F    | <i>Adnp</i> <sup>+/+</sup> | NAP       | 0.10              | 0.09              | 7.18                       | 0.20                   | 0.08                      | 0.09              | 0.07              | 6.34                       | 0.17                   | 0.07                      | 0.10              | 0.09              | 6.70                       | 0.19                   | 0.08                      | 0.11              | 0.07              | 6.34                       | 0.17                   | 0.07                      |
| 8N2 F     | <i>Adnp</i> <sup>+/+</sup> | NAP       | 0.09              | 0.09              | 5.41                       | 0.18                   | 0.09                      | 0.09              | 0.08              | 5.09                       | 0.17                   | 0.07                      | 0.09              | 0.08              | 5.12                       | 0.17                   | 0.08                      | 0.10              | 0.07              | 4.88                       | 0.17                   | 0.07                      |
| 9N1 F     | <i>Adnp</i> <sup>+/+</sup> | NAP       | 0.17              | 0.11              | 6.40                       | 0.29                   | 0.11                      | 0.15              | 0.09              | 4.84                       | 0.23                   | 0.06                      | 0.16              | 0.11              | 5.98                       | 0.28                   | 0.10                      | 0.19              | 0.08              | 6.02                       | 0.28                   | 0.12                      |
| 10N2 F    | <i>Adnp</i> <sup>+/+</sup> | NAP       | 0.07              | 0.06              | 6.43                       | 0.13                   | 0.06                      | 0.08              | 0.07              | 6.87                       | 0.14                   | 0.07                      | 0.07              | 0.06              | 6.67                       | 0.13                   | 0.06                      | 0.07              | 0.07              | 6.27                       | 0.14                   | 0.06                      |
| 10N3 F    | <i>Adnp</i> <sup>+/+</sup> | NAP       | 0.06              | 0.07              | 7.37                       | 0.13                   | 0.05                      | 0.06              | 0.07              | 7.26                       | 0.13                   | 0.05                      | 0.06              | 0.06              | 6.82                       | 0.12                   | 0.06                      | 0.06              | 0.07              | 6.76                       | 0.13                   | 0.05                      |
| 10N5 F    | <i>Adnp</i> <sup>+/+</sup> | NAP       | 0.03              | 0.11              | 6.82                       | 0.15                   | 0.04                      | 0.02              | 0.13              | 6.86                       | 0.15                   | 0.02                      | 0.04              | 0.09              | 6.40                       | 0.13                   | 0.04                      | 0.02              | 0.09              | 4.94                       | 0.11                   | 0.03                      |
| 11N3 F    | <i>Adnp</i> <sup>+/+</sup> | NAP       | 0.08              | 0.09              | 7.45                       | 0.18                   | 0.07                      | 0.08              | 0.07              | 6.40                       | 0.15                   | 0.05                      | 0.07              | 0.08              | 6.77                       | 0.16                   | 0.06                      | 0.08              | 0.08              | 7.08                       | 0.17                   | 0.04                      |
| 11N4 F    | <i>Adnp</i> <sup>+/+</sup> | NAP       | 0.11              | 0.09              | 6.26                       | 0.20                   | 0.07                      | 0.09              | 0.07              | 4.72                       | 0.15                   | 0.05                      | 0.10              | 0.08              | 6.13                       | 0.18                   | 0.07                      | 0.11              | 0.08              | 5.95                       | 0.18                   | 0.07                      |
| 3310F     | <i>Adnp</i> <sup>+/+</sup> | NAP       | 0.17              | 0.08              | 4.15                       | 0.25                   | 0.08                      | 0.16              | 0.07              | 4.05                       | 0.24                   | 0.08                      | 0.17              | 0.09              | 4.24                       | 0.26                   | 0.08                      | 0.13              | 0.07              | 3.26                       | 0.20                   | 0.06                      |
| 3320F     | <i>Adnp</i> <sup>+/+</sup> | NAP       | 0.12              | 0.10              | 4.55                       | 0.22                   | 0.10                      | 0.15              | 0.08              | 5.17                       | 0.24                   | 0.09                      | 0.14              | 0.10              | 4.95                       | 0.24                   | 0.12                      | 0.12              | 0.08              | 4.30                       | 0.20                   | 0.06                      |
| 3322F     | <i>Adnp</i> <sup>+/+</sup> | NAP       | 0.20              | 0.10              | 4.06                       | 0.30                   | 0.08                      | 0.21              | 0.07              | 3.77                       | 0.30                   | 0.08                      | 0.21              | 0.09              | 4.28                       | 0.30                   | 0.09                      | 0.22              | 0.11              | 4.88                       | 0.35                   | 0.09                      |
| 3325F     | <i>Adnp</i> <sup>+/+</sup> | NAP       | 0.18              | 0.09              | 3.69                       | 0.26                   | 0.09                      | 0.19              | 0.07              | 3.48                       | 0.26                   | 0.06                      | 0.18              | 0.09              | 3.58                       | 0.27                   | 0.09                      | 0.21              | 0.06              | 3.55                       | 0.27                   | 0.07                      |
| 3326F     | <i>Adnp</i> <sup>+/+</sup> | NAP       | 0.13              | 0.08              | 4.63                       | 0.20                   | 0.07                      | 0.12              | 0.07              | 4.18                       | 0.19                   | 0.05                      | 0.14              | 0.07              | 4.55                       | 0.21                   | 0.08                      | 0.15              | 0.06              | 4.49                       | 0.21                   | 0.07                      |
| 3335F     | <i>Adnp</i> <sup>+/+</sup> | NAP       | 0.18              | 0.11              | 5.33                       | 0.28                   | 0.10                      | 0.15              | 0.07              | 3.87                       | 0.22                   | 0.07                      | 0.18              | 0.11              | 5.39                       | 0.28                   | 0.11                      | 0.15              | 0.08              | 4.33                       | 0.23                   | 0.07                      |
| 3057F     | <i>Adnp</i> <sup>+/+</sup> | NAP       | 0.18              | 0.12              | 5.39                       | 0.31                   | 0.11                      | 0.18              | 0.08              | 4.72                       | 0.26                   | 0.08                      | 0.18              | 0.10              | 5.02                       | 0.29                   | 0.11                      | 0.15              | 0.07              | 3.85                       | 0.22                   | 0.06                      |
| 3072F     | <i>Adnp</i> <sup>+/+</sup> | NAP       | 0.11              | 0.08              | 5.98                       | 0.19                   | 0.08                      | 0.10              | 0.06              | 4.84                       | 0.15                   | 0.06                      | 0.11              | 0.08              | 5.98                       | 0.19                   | 0.08                      | 0.12              | 0.07              | 5.94                       | 0.19                   | 0.07                      |
| 3075F     | <i>Adnp</i> <sup>+/+</sup> | NAP       | 0.15              | 0.09              | 4.70                       | 0.24                   | 0.08                      | 0.20              | 0.07              | 5.49                       | 0.28                   | 0.08                      | 0.17              | 0.10              | 5.44                       | 0.28                   | 0.10                      | 0.16              | 0.07              | 5.24                       | 0.23                   | 0.07                      |
| 3148F     | <i>Adnp</i> <sup>+/+</sup> | NAP       | 0.19              | 0.09              | 4.83                       | 0.29                   | 0.10                      | 0.18              | 0.11              | 4.76                       | 0.29                   | 0.09                      | 0.14              | 0.09              | 3.70                       | 0.23                   | 0.07                      | 0.16              | 0.08              | 4.38                       | 0.25                   | 0.10                      |
| 2964F     | <i>Adnp</i> <sup>+/+</sup> | NAP       | 0.17              | 0.10              | 4.60                       | 0.28                   | 0.10                      | 0.20              | 0.08              | 4.59                       | 0.28                   | 0.08                      | 0.17              | 0.10              | 4.50                       | 0.27                   | 0.10                      | 0.20              | 0.08              | 4.50                       | 0.28                   | 0.07                      |
| 2965F     | <i>Adnp</i> <sup>+/+</sup> | NAP       | 0.19              | 0.09              | 5.42                       | 0.29                   | 0.10                      | 0.19              | 0.08              | 5.58                       | 0.28                   | 0.09                      | 0.18              | 0.10              | 5.45                       | 0.29                   | 0.09                      | 0.17              | 0.08              | 5.08                       | 0.25                   | 0.07                      |
| 2967F     | <i>Adnp</i> <sup>+/+</sup> | NAP       | 0.19              | 0.11              | 4.83                       | 0.30                   | 0.09                      | 0.23              | 0.09              | 4.71                       | 0.29                   | 0.09                      | 0.19              | 0.10              | 4.77                       | 0.30                   | 0.10                      | 0.20              | 0.09              | 4.33                       | 0.29                   | 0.06                      |

| Mouse No. | Genotype                   | Treatment | RF Stand (s) Mean | RF Swing (s) Mean | RF Stride Length (cm) Mean | RF Step Cycle (s) Mean | RF Single Stance (s) Mean | RH Stand (s) Mean | RH Swing (s) Mean | RH Stride Length (cm) Mean | RH Step Cycle (s) Mean | RH Single Stance (s) Mean | LF Stand (s) Mean | LF Swing (s) Mean | LF Stride Length (cm) Mean | LF Step Cycle (s) Mean | LF Single Stance (s) Mean | LH Stand (s) Mean | LH Swing (s) Mean | LH Stride Length (cm) Mean | LH Step Cycle (s) Mean | LH Single Stance (s) Mean |
|-----------|----------------------------|-----------|-------------------|-------------------|----------------------------|------------------------|---------------------------|-------------------|-------------------|----------------------------|------------------------|---------------------------|-------------------|-------------------|----------------------------|------------------------|---------------------------|-------------------|-------------------|----------------------------|------------------------|---------------------------|
| 2976F     | <i>Adnp</i> <sup>+/+</sup> | NAP       | 0.19              | 0.10              | 6.27                       | 0.28                   | 0.11                      | 0.16              | 0.09              | 5.87                       | 0.24                   | 0.07                      | 0.17              | 0.10              | 5.94                       | 0.27                   | 0.09                      | 0.17              | 0.08              | 5.51                       | 0.25                   | 0.08                      |
| 2978F     | <i>Adnp</i> <sup>+/+</sup> | NAP       | 0.14              | 0.08              | 5.04                       | 0.22                   | 0.07                      | 0.16              | 0.06              | 5.05                       | 0.22                   | 0.07                      | 0.16              | 0.08              | 5.44                       | 0.24                   | 0.08                      | 0.16              | 0.08              | 5.39                       | 0.26                   | 0.06                      |
| 2979F     | <i>Adnp</i> <sup>+/+</sup> | NAP       | 0.10              | 0.07              | 6.35                       | 0.18                   | 0.07                      | 0.11              | 0.07              | 6.93                       | 0.18                   | 0.07                      | 0.11              | 0.07              | 6.56                       | 0.18                   | 0.06                      | 0.10              | 0.06              | 5.91                       | 0.16                   | 0.06                      |
| 2987F     | <i>Adnp</i> <sup>+/+</sup> | NAP       | 0.20              | 0.11              | 5.18                       | 0.31                   | 0.10                      | 0.21              | 0.08              | 4.72                       | 0.27                   | 0.08                      | 0.19              | 0.12              | 5.17                       | 0.30                   | 0.10                      | 0.19              | 0.08              | 4.76                       | 0.27                   | 0.08                      |
| 2989F     | <i>Adnp</i> <sup>+/+</sup> | NAP       | 0.20              | 0.08              | 5.24                       | 0.30                   | 0.08                      | 0.19              | 0.07              | 4.80                       | 0.28                   | 0.07                      | 0.18              | 0.08              | 4.59                       | 0.27                   | 0.07                      | 0.19              | 0.08              | 4.75                       | 0.26                   | 0.06                      |
| 2997F     | <i>Adnp</i> <sup>+/+</sup> | NAP       | 0.12              | 0.10              | 6.45                       | 0.22                   | 0.09                      | 0.13              | 0.07              | 6.18                       | 0.21                   | 0.07                      | 0.12              | 0.10              | 6.48                       | 0.21                   | 0.09                      | 0.13              | 0.08              | 6.39                       | 0.22                   | 0.07                      |
| 2998F     | <i>Adnp</i> <sup>+/+</sup> | NAP       | 0.17              | 0.12              | 5.96                       | 0.29                   | 0.10                      | 0.20              | 0.09              | 5.86                       | 0.29                   | 0.09                      | 0.19              | 0.11              | 6.17                       | 0.29                   | 0.13                      | 0.18              | 0.09              | 5.39                       | 0.27                   | 0.08                      |
| 3000F     | <i>Adnp</i> <sup>+/+</sup> | NAP       | 0.21              | 0.09              | 4.99                       | 0.29                   | 0.09                      | 0.21              | 0.08              | 4.91                       | 0.30                   | 0.08                      | 0.16              | 0.09              | 4.36                       | 0.25                   | 0.08                      | 0.21              | 0.08              | 4.88                       | 0.27                   | 0.07                      |

**Table S28. Raw data for motor, social and memory test results.**

| Mouse No. | Genotype                   | Treatment | Sex    | Motor tests  |               | Social and Memory tests |               |                                  |        |
|-----------|----------------------------|-----------|--------|--------------|---------------|-------------------------|---------------|----------------------------------|--------|
|           |                            |           |        | Hanging Wire | Grip Strength | Object recognition      | Social memory | Social recognition cup vs. mouse |        |
| 2992      | <i>Adnp</i> <sup>+/+</sup> | Saline/DD | Male   | 40.71        | 111.90        | 0.06                    | 0.07          | 35.40                            | 62.32  |
| 2993      | <i>Adnp</i> <sup>+/+</sup> | Saline/DD | Male   | 33.46        | 74.70         | 0.65                    | 0.60          | 22.60                            | 140.00 |
| 2994      | <i>Adnp</i> <sup>+/+</sup> | Saline/DD | Male   | 90.00        | 88.38         | 0.51                    | 0.20          | 41.20                            | 102.84 |
| 2996      | <i>Adnp</i> <sup>+/+</sup> | Saline/DD | Male   | 90.00        | 158.74        | 0.15                    | 0.23          | 13.56                            | 54.80  |
| 3003      | <i>Adnp</i> <sup>+/+</sup> | Saline/DD | Male   | 41.64        | 104.72        | 0.67                    | 0.14          | 38.56                            | 92.56  |
| 2973      | <i>Adnp</i> <sup>+/+</sup> | Saline/DD | Male   | 45.98        | 118.48        | 0.00                    | 0.39          | 26.28                            | 97.52  |
| 2983      | <i>Adnp</i> <sup>+/+</sup> | Saline/DD | Male   | 38.40        | 79.68         | -0.32                   | 0.48          | 31.40                            | 76.84  |
| 2984      | <i>Adnp</i> <sup>+/+</sup> | Saline/DD | Male   | 90.00        | 80.70         | 0.67                    | 0.46          | 62.16                            | 77.28  |
| 3019      | <i>Adnp</i> <sup>+/+</sup> | Saline/DD | Male   | 18.89        | 117.06        | 0.52                    | 0.03          | 84.60                            | 127.44 |
| 3020      | <i>Adnp</i> <sup>+/+</sup> | Saline/DD | Male   | 41.44        | 122.92        | 0.43                    | -0.25         | 87.36                            | 138.88 |
| 3021      | <i>Adnp</i> <sup>+/+</sup> | Saline/DD | Male   | 41.98        | 124.16        | 0.28                    | 0.14          | 46.04                            | 172.72 |
| 3295      | <i>Adnp</i> <sup>+/+</sup> | Saline/DD | Male   | 44.56        | 80.26         | 0.25                    | -0.66         | 30.96                            | 249.24 |
| 3296      | <i>Adnp</i> <sup>+/+</sup> | Saline/DD | Male   | 39.37        | 118.00        | 0.11                    | 0.23          | 50.00                            | 78.20  |
| 3299      | <i>Adnp</i> <sup>+/+</sup> | Saline/DD | Male   | 30.37        | 134.90        | 0.20                    | -0.20         | 36.96                            | 101.08 |
| 3307      | <i>Adnp</i> <sup>+/+</sup> | Saline/DD | Male   | 28.54        | 81.78         | -0.13                   | 0.67          | 7.60                             | 207.44 |
| 3308      | <i>Adnp</i> <sup>+/+</sup> | Saline/DD | Male   | 44.67        | 124.60        | 0.29                    | 0.78          | 49.56                            | 176.60 |
| 3315      | <i>Adnp</i> <sup>+/+</sup> | Saline/DD | Male   | 30.59        | 152.62        | 0.03                    | -0.34         | 35.76                            | 122.72 |
| 3317      | <i>Adnp</i> <sup>+/+</sup> | Saline/DD | Male   | 25.58        | 86.12         | -0.33                   | 0.68          | 17.64                            | 79.96  |
| 3324      | <i>Adnp</i> <sup>+/+</sup> | Saline/DD | Male   | 34.60        | 125.52        | 0.66                    | 0.47          | 27.96                            | 85.88  |
| 3334      | <i>Adnp</i> <sup>+/+</sup> | Saline/DD | Male   | 39.25        | 195.22        | 0.31                    | -0.05         | 45.04                            | 97.88  |
| 2977      | <i>Adnp</i> <sup>+/+</sup> | Saline/DD | Female | 90.00        | 121.22        | 0.12                    | -0.57         | 41.76                            | 92.88  |
| 2981      | <i>Adnp</i> <sup>+/+</sup> | Saline/DD | Female | 90.00        | 134.50        | -0.05                   | 0.36          | 41.60                            | 32.60  |
| 2963      | <i>Adnp</i> <sup>+/+</sup> | Saline/DD | Female | 90.00        | 114.16        | 0.36                    | 0.46          | 59.84                            | 92.40  |
| 2968      | <i>Adnp</i> <sup>+/+</sup> | Saline/DD | Female | 90.00        | 103.72        | 0.02                    | 0.43          | 47.12                            | 91.68  |
| 3001      | <i>Adnp</i> <sup>+/+</sup> | Saline/DD | Female | 90.00        | 102.40        | 0.61                    | 0.63          | 19.04                            | 64.28  |
| 3002      | <i>Adnp</i> <sup>+/+</sup> | Saline/DD | Female | 90.00        | 97.96         | 0.64                    | 0.62          | 34.08                            | 115.36 |
| 2990      | <i>Adnp</i> <sup>+/+</sup> | Saline/DD | Female | 90.00        | 127.78        | 0.57                    | 0.77          | 55.76                            | 100.40 |
| 3055      | <i>Adnp</i> <sup>+/+</sup> | Saline/DD | Female | 35.08        | 93.33         | 0.71                    | 0.10          | 67.80                            | 102.92 |



| Mouse No. | Genotype                   | Treatment | Sex    | Motor tests  |               | Social and Memory tests |               |                                  |        |
|-----------|----------------------------|-----------|--------|--------------|---------------|-------------------------|---------------|----------------------------------|--------|
|           |                            |           |        | Hanging Wire | Grip Strength | Object recognition      | Social memory | Social recognition cup vs. mouse |        |
| 3066      | <i>Adnp</i> <sup>+/+</sup> | Saline/DD | Female | 38.30        | 125.12        | 0.26                    | 0.41          | 53.60                            | 119.76 |
| 3070      | <i>Adnp</i> <sup>+/+</sup> | Saline/DD | Female | 48.11        | 106.08        | 0.05                    | 0.34          | 65.48                            | 108.08 |
| 3071      | <i>Adnp</i> <sup>+/+</sup> | Saline/DD | Female | 38.21        | 124.06        | 0.11                    | 0.10          | 112.52                           | 119.44 |
| 3309      | <i>Adnp</i> <sup>+/+</sup> | Saline/DD | Female | 45.29        | 63.74         | 0.36                    | 0.17          | 80.28                            | 56.56  |
| 3323      | <i>Adnp</i> <sup>+/+</sup> | Saline/DD | Female | 12.99        | 122.28        | 0.40                    | 0.07          | 47.20                            | 42.72  |
| 3327      | <i>Adnp</i> <sup>+/+</sup> | Saline/DD | Female | 40.96        | 107.96        | 0.20                    | 0.10          | 37.96                            | 27.92  |
| 3329      | <i>Adnp</i> <sup>+/+</sup> | Saline/DD | Female | 23.68        | 123.84        | -0.16                   | 0.28          | 58.00                            | 129.28 |
| 3004      | <i>Adnp</i> <sup>+/-</sup> | Saline/DD | Male   | 4.76         | 114.96        | -0.18                   | 0.26          | 32.28                            | 61.20  |
| 2969      | <i>Adnp</i> <sup>+/-</sup> | Saline/DD | Male   | 7.77         | 106.76        | -0.10                   | -0.34         | 54.04                            | 77.80  |
| 2970      | <i>Adnp</i> <sup>+/-</sup> | Saline/DD | Male   | 17.51        | 83.30         | -0.02                   | -0.52         | 45.00                            | 158.52 |
| 2985      | <i>Adnp</i> <sup>+/-</sup> | Saline/DD | Male   | 10.63        | 51.60         | -0.08                   | -0.26         | 38.56                            | 59.64  |
| 3056      | <i>Adnp</i> <sup>+/-</sup> | Saline/DD | Male   | 10.36        | 68.78         | 0.00                    | -1.00         | 73.28                            | 121.96 |
| 3069      | <i>Adnp</i> <sup>+/-</sup> | Saline/DD | Male   | 14.40        | 62.46         | -0.20                   | 0.11          | 41.76                            | 186.44 |
| 3298      | <i>Adnp</i> <sup>+/-</sup> | Saline/DD | Male   | 20.16        | 60.14         | 0.25                    | 0.06          | 27.40                            | 183.96 |
| 3301      | <i>Adnp</i> <sup>+/-</sup> | Saline/DD | Male   | 6.05         | 65.70         | -0.05                   | 0.13          | 58.68                            | 104.76 |
| 3305      | <i>Adnp</i> <sup>+/-</sup> | Saline/DD | Male   | 14.14        | 100.56        | -0.24                   | 0.20          | 78.20                            | 75.40  |
| 3311      | <i>Adnp</i> <sup>+/-</sup> | Saline/DD | Male   | 18.66        | 56.32         | -0.11                   | -0.44         | 36.56                            | 126.24 |
| 3330      | <i>Adnp</i> <sup>+/-</sup> | Saline/DD | Male   | 12.61        | 52.88         | -0.36                   | 0.07          | 20.80                            | 118.36 |
| 3336      | <i>Adnp</i> <sup>+/-</sup> | Saline/DD | Male   | 28.54        | 68.64         | -0.11                   | -0.32         | 56.24                            | 101.12 |
| 2974      | <i>Adnp</i> <sup>+/-</sup> | Saline/DD | Female | 90.00        | 83.44         | -0.15                   | 0.65          | 56.04                            | 73.76  |
| 3023      | <i>Adnp</i> <sup>+/-</sup> | Saline/DD | Female | 90.00        | 108.06        | 0.10                    | -0.15         | 84.72                            | 144.40 |
| 3024      | <i>Adnp</i> <sup>+/-</sup> | Saline/DD | Female | 37.66        | 83.53         | -0.09                   | -0.82         | 60.80                            | 131.68 |
| 3074      | <i>Adnp</i> <sup>+/-</sup> | Saline/DD | Female | 30.31        | 94.32         | 0.32                    | -0.22         | 91.48                            | 95.08  |
| 3146      | <i>Adnp</i> <sup>+/-</sup> | Saline/DD | Female | 20.27        | 81.82         | -0.04                   | 0.00          | 66.24                            | 2.76   |
| 3314      | <i>Adnp</i> <sup>+/-</sup> | Saline/DD | Female | 8.89         | 121.50        | 0.01                    | 0.15          | 28.96                            | 47.96  |
| 3321      | <i>Adnp</i> <sup>+/-</sup> | Saline/DD | Female | 90.00        | 73.43         | 0.03                    | -0.08         | 20.32                            | 79.96  |
| 2971      | <i>Adnp</i> <sup>+/+</sup> | NAP       | Male   | 24.05        | 131.98        | 0.13                    | -0.05         | 35.20                            | 130.16 |
| 2972      | <i>Adnp</i> <sup>+/+</sup> | NAP       | Male   | 90.00        | 123.38        | 0.80                    | 0.42          | 52.12                            | 110.88 |
| 2986      | <i>Adnp</i> <sup>+/+</sup> | NAP       | Male   | 35.89        | 127.48        | 0.15                    | 0.21          | 37.64                            | 71.24  |
| 3005      | <i>Adnp</i> <sup>+/+</sup> | NAP       | Male   | 90.00        | 106.94        | 0.41                    | 0.94          | 23.64                            | 136.20 |

| Mouse No. | Genotype                   | Treatment | Sex    | Motor tests  |               | Social and Memory tests |               |                                  |        |
|-----------|----------------------------|-----------|--------|--------------|---------------|-------------------------|---------------|----------------------------------|--------|
|           |                            |           |        | Hanging Wire | Grip Strength | Object recognition      | Social memory | Social recognition cup vs. mouse |        |
| 3053      | <i>Adnp</i> <sup>+/+</sup> | NAP       | Male   | 39.07        | 124.16        | 0.04                    | 0.41          | 62.72                            | 99.08  |
| 3073      | <i>Adnp</i> <sup>+/+</sup> | NAP       | Male   | 90.00        | 125.92        | 0.61                    | 0.02          | 88.28                            | 89.88  |
| 3147      | <i>Adnp</i> <sup>+/+</sup> | NAP       | Male   | 29.95        | 108.78        | 0.00                    | -0.25         | 75.00                            | 164.64 |
| 3294      | <i>Adnp</i> <sup>+/+</sup> | NAP       | Male   | 24.85        | 63.72         | 0.11                    | 0.27          | 80.32                            | 91.68  |
| 3297      | <i>Adnp</i> <sup>+/+</sup> | NAP       | Male   | 8.52         | 78.62         | -0.38                   | -0.09         | 71.72                            | 108.40 |
| 3303      | <i>Adnp</i> <sup>+/+</sup> | NAP       | Male   | 90.00        | 84.26         | -0.07                   | 0.63          | 45.28                            | 135.60 |
| 3312      | <i>Adnp</i> <sup>+/+</sup> | NAP       | Male   | 60.36        | 114.64        | 0.40                    | 0.35          | 28.96                            | 261.76 |
| 3333      | <i>Adnp</i> <sup>+/+</sup> | NAP       | Male   | 47.28        | 111.60        | 0.33                    | -0.40         | 84.48                            | 163.24 |
| 2966      | <i>Adnp</i> <sup>+/+</sup> | NAP       | Female | 64.58        | 118.82        | -0.16                   | -0.01         | 58.76                            | 122.16 |
| 2988      | <i>Adnp</i> <sup>+/+</sup> | NAP       | Female | 90.00        | 110.68        | -0.19                   | 0.68          | 28.96                            | 85.44  |
| 2991      | <i>Adnp</i> <sup>+/+</sup> | NAP       | Female | 37.56        | 113.22        | 0.03                    | 0.75          | 16.68                            | 79.92  |
| 2975      | <i>Adnp</i> <sup>+/+</sup> | NAP       | Female | 71.86        | 93.82         | 0.15                    | 0.62          | 38.60                            | 30.68  |
| 2980      | <i>Adnp</i> <sup>+/+</sup> | NAP       | Female | 90.00        | 95.12         | 0.39                    | 0.59          | 55.48                            | 91.56  |
| 2999      | <i>Adnp</i> <sup>+/+</sup> | NAP       | Female | 90.00        | 113.64        | 0.03                    | 0.90          | 17.72                            | 13.32  |
| 3018      | <i>Adnp</i> <sup>+/+</sup> | NAP       | Female | 90.00        | 114.18        | 0.33                    | 0.24          | 56.84                            | 72.76  |
| 3025      | <i>Adnp</i> <sup>+/+</sup> | NAP       | Female | 62.69        | 129.18        | 0.26                    | -0.13         | 48.12                            | 112.44 |
| 3054      | <i>Adnp</i> <sup>+/+</sup> | NAP       | Female | 90.00        | 116.18        | 0.17                    | 0.12          | 46.12                            | 144.44 |
| 3068      | <i>Adnp</i> <sup>+/+</sup> | NAP       | Female | 90.00        | 90.20         | 0.43                    | 0.38          | 62.00                            | 9.48   |
| 3302      | <i>Adnp</i> <sup>+/+</sup> | NAP       | Female | 40.44        | 96.62         | 0.29                    | -0.06         | 21.28                            | 101.32 |
| 3304      | <i>Adnp</i> <sup>+/+</sup> | NAP       | Female | 22.24        | 81.70         | 0.22                    | -0.25         | 62.64                            | 64.36  |
| 3306      | <i>Adnp</i> <sup>+/+</sup> | NAP       | Female | 9.37         | 100.18        | 0.17                    | -0.14         | 38.16                            | 66.36  |
| 3313      | <i>Adnp</i> <sup>+/+</sup> | NAP       | Female | 12.28        | 98.02         | 0.14                    | 0.01          | 44.00                            | 114.84 |
| 3318      | <i>Adnp</i> <sup>+/+</sup> | NAP       | Female | 20.64        | 156.80        | 0.35                    | -0.02         | 53.16                            | 37.84  |
| 3319      | <i>Adnp</i> <sup>+/+</sup> | NAP       | Female | 53.91        | 120.66        | 0.04                    | 0.93          | 44.24                            | 110.76 |
| 3331      | <i>Adnp</i> <sup>+/+</sup> | NAP       | Female | 64.63        | 106.82        | 0.46                    | 0.71          | 38.12                            | 118.88 |
| 3332      | <i>Adnp</i> <sup>+/+</sup> | NAP       | Female | 43.41        | 109.46        | -0.69                   | 0.93          | 19.32                            | 40.48  |
| 3335      | <i>Adnp</i> <sup>+/+</sup> | NAP       | Female | 46.33        | 103.46        | 0.41                    | 0.04          | 33.72                            | 108.08 |
| 2995      | <i>Adnp</i> <sup>+/-</sup> | NAP       | Male   | 90.00        | 112.34        | 0.27                    | 0.95          | 42.40                            | 80.72  |
| 2982      | <i>Adnp</i> <sup>+/-</sup> | NAP       | Male   | 90.00        | 167.08        | 0.31                    | 0.82          | 29.24                            | 130.32 |
| 3022      | <i>Adnp</i> <sup>+/-</sup> | NAP       | Male   | 90.00        | 111.86        | 0.22                    | 0.10          | 56.44                            | 169.72 |

| Mouse No. | Genotype                   | Treatment | Sex    | Motor tests  |               | Social and Memory tests |               |                                  |        |
|-----------|----------------------------|-----------|--------|--------------|---------------|-------------------------|---------------|----------------------------------|--------|
|           |                            |           |        | Hanging Wire | Grip Strength | Object recognition      | Social memory | Social recognition cup vs. mouse |        |
| 3017      | <i>Adnp</i> <sup>+/-</sup> | NAP       | Male   | 38.43        | 161.38        | 0.03                    | 0.28          | 31.8                             | 110.68 |
| 3065      | <i>Adnp</i> <sup>+/-</sup> | NAP       | Male   | 38.48        | 106.42        | -0.03                   | -0.14         | 70.2                             | 73.32  |
| 3067      | <i>Adnp</i> <sup>+/-</sup> | NAP       | Male   | 35.99        | 93.25         | -0.18                   | -0.05         | 36.44                            | 113.24 |
| 3300      | <i>Adnp</i> <sup>+/-</sup> | NAP       | Male   | 20.77        | 56.24         | 0.31                    | -0.21         | 63.8                             | 72.68  |
| 3316      | <i>Adnp</i> <sup>+/-</sup> | NAP       | Male   | 27.54        | 148.14        | 0.48                    | 1.00          | 111.92                           | 27.92  |
| 3328      | <i>Adnp</i> <sup>+/-</sup> | NAP       | Male   | 36.65        | 108.84        | -0.03                   | 0.07          | 41.8                             | 91.24  |
| 2964      | <i>Adnp</i> <sup>+/-</sup> | NAP       | Female | 90.00        | 84.68         | -0.09                   | 0.40          | 37.20                            | 108.36 |
| 2965      | <i>Adnp</i> <sup>+/-</sup> | NAP       | Female | 90.00        | 107.60        | 0.36                    | 0.33          | 10.92                            | 137.96 |
| 2967      | <i>Adnp</i> <sup>+/-</sup> | NAP       | Female | 90.00        | 77.24         | 0.41                    | 0.98          | 19.52                            | 4.60   |
| 2987      | <i>Adnp</i> <sup>+/-</sup> | NAP       | Female | 90.00        | 95.60         | 0.26                    | 0.75          | 26.92                            | 70.60  |
| 2989      | <i>Adnp</i> <sup>+/-</sup> | NAP       | Female | 90.00        | 95.16         | 0.31                    | 0.38          | 28.12                            | 179.08 |
| 2976      | <i>Adnp</i> <sup>+/-</sup> | NAP       | Female | 12.22        | 72.84         | 0.50                    | 0.11          | 65.08                            | 117.64 |
| 2978      | <i>Adnp</i> <sup>+/-</sup> | NAP       | Female | 90.00        | 99.46         | 0.92                    | 1.00          | 60.28                            | 62.40  |
| 2979      | <i>Adnp</i> <sup>+/-</sup> | NAP       | Female | 90.00        | 100.43        | 1.00                    | 0.19          | 7.12                             | 148.24 |
| 2997      | <i>Adnp</i> <sup>+/-</sup> | NAP       | Female | 90.00        | 127.75        | 0.64                    | 0.25          | 52.36                            | 102.92 |
| 2998      | <i>Adnp</i> <sup>+/-</sup> | NAP       | Female | 90.00        | 121.04        | 0.05                    | 0.46          | 40.92                            | 87.60  |
| 3000      | <i>Adnp</i> <sup>+/-</sup> | NAP       | Female | 90.00        | 147.70        | 0.00                    | 0.40          | 8.28                             | 23.68  |
| 3057      | <i>Adnp</i> <sup>+/-</sup> | NAP       | Female | 38.06        | 94.64         | -0.10                   | 0.71          | 45.28                            | 105.52 |
| 3072      | <i>Adnp</i> <sup>+/-</sup> | NAP       | Female | 61.56        | 112.96        | -0.07                   | 0.02          | 26.88                            | 85.40  |
| 3075      | <i>Adnp</i> <sup>+/-</sup> | NAP       | Female | 46.35        | 103.68        | 0.17                    | -0.20         | 88.00                            | 77.16  |
| 3148      | <i>Adnp</i> <sup>+/-</sup> | NAP       | Female | 26.35        | 111.32        | 0.04                    | 0.01          | 82.60                            | 54.80  |
| 3310      | <i>Adnp</i> <sup>+/-</sup> | NAP       | Female | 11.46        | 81.03         | 0.15                    | -0.15         | 45.52                            | 33.68  |
| 3320      | <i>Adnp</i> <sup>+/-</sup> | NAP       | Female | 14.96        | 119.66        | 0.86                    | 0.41          | 38.48                            | 33.20  |
| 3322      | <i>Adnp</i> <sup>+/-</sup> | NAP       | Female | 37.15        | 116.18        | 0.25                    | 0.91          | 36.52                            | 12.12  |
| 3325      | <i>Adnp</i> <sup>+/-</sup> | NAP       | Female | 38.14        | 100.02        | 0.37                    | 0.33          | 26.56                            | 140.04 |
| 3326      | <i>Adnp</i> <sup>+/-</sup> | NAP       | Female | 90.00        | 107.06        | -0.14                   | -0.24         | 12.88                            | 66.92  |

**Table S29. Raw data for odor discrimination test results.**

| Mouse No. | Genotype                   | Treatment | Sex    | Water |       |       | Vanilla |       |       | Almond |       |       |
|-----------|----------------------------|-----------|--------|-------|-------|-------|---------|-------|-------|--------|-------|-------|
|           |                            |           |        | 1     | 2     | 3     | 1       | 2     | 3     | 1      | 2     | 3     |
| 2992      | <i>Adnp</i> <sup>+/+</sup> | Saline/DD | Male   | 13.24 | 7.48  | 4.40  | 15.24   | 19.00 | 0.36  | 4.72   | 1.08  | 11.88 |
| 2993      | <i>Adnp</i> <sup>+/+</sup> | Saline/DD | Male   | 18.48 | 22.20 | 18.40 | 19.24   | 12.00 | 13.80 | 19.36  | 11.28 | 7.20  |
| 2994      | <i>Adnp</i> <sup>+/+</sup> | Saline/DD | Male   | 13.00 | 16.24 | 4.28  | 11.96   | 5.80  | 7.77  | 21.75  | 2.76  | 0.16  |
| 2996      | <i>Adnp</i> <sup>+/+</sup> | Saline/DD | Male   | 7.96  | 14.48 | 14.16 | 8.40    | 3.88  | 1.08  | 13.44  | 3.96  | 3.80  |
| 3003      | <i>Adnp</i> <sup>+/+</sup> | Saline/DD | Male   | 16.40 | 24.52 | 8.36  | 23.76   | 16.64 | 18.54 | 19.20  | 31.12 | 9.64  |
| 2973      | <i>Adnp</i> <sup>+/+</sup> | Saline/DD | Male   | 10.40 | 10.72 | 12.44 | 22.60   | 5.76  | 0.00  | 0.32   | 3.16  | 1.28  |
| 2983      | <i>Adnp</i> <sup>+/+</sup> | Saline/DD | Male   | 23.99 | 11.92 | 12.96 | 14.04   | 11.48 | 5.32  | 8.52   | 9.16  | 16.04 |
| 2984      | <i>Adnp</i> <sup>+/+</sup> | Saline/DD | Male   | 19.64 | 18.56 | 7.64  | 15.59   | 11.36 | 18.16 | 16.32  | 16.60 | 13.56 |
| 3019      | <i>Adnp</i> <sup>+/+</sup> | Saline/DD | Male   | 17.80 | 14.40 | 8.32  | 26.44   | 2.96  | 9.91  | 27.42  | 6.92  | 3.64  |
| 3020      | <i>Adnp</i> <sup>+/+</sup> | Saline/DD | Male   | 17.52 | 14.20 | 19.48 | 20.28   | 13.40 | 7.68  | 6.72   | 7.76  | 0.40  |
| 3021      | <i>Adnp</i> <sup>+/+</sup> | Saline/DD | Male   | 6.16  | 11.00 | 13.96 | 14.40   | 18.72 | 8.22  | 19.04  | 5.40  | 6.76  |
| 2977      | <i>Adnp</i> <sup>+/+</sup> | Saline/DD | Female | 17.52 | 11.04 | 10.00 | 24.16   | 6.12  | 9.32  | 29.44  | 4.76  | 6.36  |
| 2981      | <i>Adnp</i> <sup>+/+</sup> | Saline/DD | Female | 21.04 | 18.80 | 8.99  | 6.84    | 21.56 | 3.11  | 25.60  | 7.80  | 2.25  |
| 2963      | <i>Adnp</i> <sup>+/+</sup> | Saline/DD | Female | 13.20 | 11.08 | 23.18 | 10.76   | 9.12  | 3.70  | 21.72  | 8.00  | 4.39  |
| 2968      | <i>Adnp</i> <sup>+/+</sup> | Saline/DD | Female | 18.92 | 8.56  | 7.44  | 0.00    | 7.56  | 4.08  | 10.36  | 0.00  | 2.11  |
| 3001      | <i>Adnp</i> <sup>+/+</sup> | Saline/DD | Female | 25.16 | 9.56  | 5.40  | 26.40   | 19.28 | 3.96  | 1.12   | 13.88 | 8.24  |
| 3002      | <i>Adnp</i> <sup>+/+</sup> | Saline/DD | Female | 12.76 | 11.88 | 6.12  | 18.04   | 20.23 | 1.52  | 13.32  | 4.01  | 12.75 |
| 2990      | <i>Adnp</i> <sup>+/+</sup> | Saline/DD | Female | 10.36 | 18.84 | 10.45 | 21.39   | 10.52 | 7.96  | 16.20  | 17.08 | 5.52  |
| 3055      | <i>Adnp</i> <sup>+/+</sup> | Saline/DD | Female | 23.52 | 16.80 | 18.79 | 29.48   | 23.84 | 11.92 | 15.00  | 3.72  | 2.84  |
| 3066      | <i>Adnp</i> <sup>+/+</sup> | Saline/DD | Female | 9.64  | 17.64 | 13.98 | 17.92   | 14.80 | 3.08  | 11.96  | 13.12 | 4.24  |
| 3070      | <i>Adnp</i> <sup>+/+</sup> | Saline/DD | Female | 11.04 | 0.00  | 7.08  | 18.04   | 2.24  | 0.28  | 13.92  | 4.76  | 6.00  |
| 3071      | <i>Adnp</i> <sup>+/+</sup> | Saline/DD | Female | 6.92  | 5.28  | 3.92  | 27.88   | 15.76 | 13.04 | 23.32  | 16.08 | 13.64 |
| 3004      | <i>Adnp</i> <sup>+/-</sup> | Saline/DD | Male   | 10.16 | 16.56 | 13.48 | 27.00   | 9.04  | 10.74 | 24.04  | 5.05  | 6.72  |
| 2969      | <i>Adnp</i> <sup>+/-</sup> | Saline/DD | Male   | 5.40  | 4.48  | 8.88  | 11.52   | 6.00  | 6.56  | 17.28  | 5.56  | 4.92  |
| 2970      | <i>Adnp</i> <sup>+/-</sup> | Saline/DD | Male   | 27.96 | 21.80 | 11.20 | 21.26   | 28.02 | 5.00  | 4.41   | 0.00  | 0.00  |
| 2985      | <i>Adnp</i> <sup>+/-</sup> | Saline/DD | Male   | 17.32 | 18.92 | 15.56 | 17.52   | 24.68 | 4.94  | 10.58  | 4.08  | 4.48  |
| 3056      | <i>Adnp</i> <sup>+/-</sup> | Saline/DD | Male   | 6.28  | 3.08  | 1.88  | 13.48   | 1.36  | 2.24  | 10.39  | 0.00  | 7.80  |
| 3069      | <i>Adnp</i> <sup>+/-</sup> | Saline/DD | Male   | 16.68 | 20.20 | 6.52  | 8.76    | 11.60 | 1.20  | 24.51  | 9.60  | 11.92 |

| Mouse No. | Genotype                   | Treatment | Sex    | Water |       |       | Vanilla |       |       | Almond |       |       |
|-----------|----------------------------|-----------|--------|-------|-------|-------|---------|-------|-------|--------|-------|-------|
|           |                            |           |        | 1     | 2     | 3     | 1       | 2     | 3     | 1      | 2     | 3     |
| 2974      | <i>Adnp</i> <sup>+/-</sup> | Saline/DD | Female | 21.16 | 7.76  | 3.68  | 5.96    | 2.20  | 0.60  | 6.88   | 2.84  | 7.29  |
| 3023      | <i>Adnp</i> <sup>+/-</sup> | Saline/DD | Female | 26.24 | 20.92 | 10.50 | 18.22   | 8.64  | 3.92  | 10.20  | 16.96 | 2.92  |
| 3024      | <i>Adnp</i> <sup>+/-</sup> | Saline/DD | Female | 27.52 | 20.68 | 16.84 | 14.26   | 13.96 | 19.54 | 19.82  | 15.87 | 16.42 |
| 3074      | <i>Adnp</i> <sup>+/-</sup> | Saline/DD | Female | 19.52 | 7.96  | 7.88  | 26.48   | 17.16 | 12.95 | 9.00   | 9.36  | 5.24  |
| 3146      | <i>Adnp</i> <sup>+/-</sup> | Saline/DD | Female | 7.96  | 8.96  | 4.52  | 11.89   | 15.20 | 6.50  | 17.32  | 12.60 | 15.60 |
| 2971      | <i>Adnp</i> <sup>+/+</sup> | NAP       | Male   | 15.76 | 12.72 | 12.07 | 14.24   | 8.36  | 2.85  | 8.21   | 5.20  | 0.48  |
| 2972      | <i>Adnp</i> <sup>+/+</sup> | NAP       | Male   | 29.12 | 12.20 | 7.76  | 10.50   | 8.64  | 3.16  | 11.40  | 5.16  | 5.84  |
| 2986      | <i>Adnp</i> <sup>+/+</sup> | NAP       | Male   | 28.12 | 28.64 | 9.88  | 8.76    | 6.16  | 7.46  | 14.56  | 3.84  | 8.20  |
| 3005      | <i>Adnp</i> <sup>+/+</sup> | NAP       | Male   | 13.72 | 14.32 | 6.60  | 11.92   | 11.20 | 6.13  | 8.20   | 3.28  | 5.00  |
| 3053      | <i>Adnp</i> <sup>+/+</sup> | NAP       | Male   | 7.92  | 14.76 | 11.48 | 16.88   | 15.64 | 7.01  | 25.84  | 2.96  | 5.84  |
| 3073      | <i>Adnp</i> <sup>+/+</sup> | NAP       | Male   | 22.12 | 6.32  | 3.88  | 18.64   | 8.92  | 5.37  | 26.96  | 3.24  | 15.48 |
| 3147      | <i>Adnp</i> <sup>+/+</sup> | NAP       | Male   | 24.32 | 13.32 | 8.20  | 23.81   | 11.28 | 10.06 | 6.30   | 0.00  | 0.00  |
| 2966      | <i>Adnp</i> <sup>+/+</sup> | NAP       | Female | 38.84 | 17.40 | 8.28  | 12.56   | 0.00  | 0.00  | 7.08   | 1.72  | 0.12  |
| 2988      | <i>Adnp</i> <sup>+/+</sup> | NAP       | Female | 18.76 | 14.00 | 7.24  | 10.16   | 2.40  | 0.16  | 1.28   | 9.08  | 5.36  |
| 2991      | <i>Adnp</i> <sup>+/+</sup> | NAP       | Female | 14.00 | 16.16 | 11.40 | 14.68   | 18.80 | 16.92 | 9.08   | 15.48 | 13.12 |
| 2975      | <i>Adnp</i> <sup>+/+</sup> | NAP       | Female | 26.68 | 26.40 | 17.68 | 31.72   | 24.35 | 19.24 | 34.60  | 80.84 | 88.04 |
| 2980      | <i>Adnp</i> <sup>+/+</sup> | NAP       | Female | 23.76 | 29.24 | 7.92  | 33.88   | 8.52  | 12.84 | 35.44  | 15.96 | 12.68 |
| 2999      | <i>Adnp</i> <sup>+/+</sup> | NAP       | Female | 18.72 | 10.56 | 13.12 | 7.24    | 16.28 | 6.52  | 11.16  | 5.88  | 0.00  |
| 3018      | <i>Adnp</i> <sup>+/+</sup> | NAP       | Female | 10.24 | 21.08 | 16.59 | 14.64   | 12.74 | 4.12  | 10.44  | 3.4   | 2.04  |
| 3025      | <i>Adnp</i> <sup>+/+</sup> | NAP       | Female | 11.24 | 15.64 | 1.44  | 26.8    | 21.07 | 14.11 | 29.99  | 34.4  | 5.8   |
| 3054      | <i>Adnp</i> <sup>+/+</sup> | NAP       | Female | 7.64  | 10.84 | 9.88  | 22.34   | 2.04  | 4.64  | 10.92  | 18.63 | 9.48  |
| 3068      | <i>Adnp</i> <sup>+/+</sup> | NAP       | Female | 6.08  | 5.56  | 1.56  | 5.48    | 2.72  | 8.36  | 5.58   | 1.68  | 0.64  |
| 2995      | <i>Adnp</i> <sup>+/-</sup> | NAP       | Male   | 29.96 | 16.72 | 1.76  | 8.33    | 2.52  | 2.08  | 5.16   | 0.00  | 0.28  |
| 2982      | <i>Adnp</i> <sup>+/-</sup> | NAP       | Male   | 17.32 | 30.96 | 14.33 | 18.52   | 12.36 | 6.59  | 12.20  | 9.00  | 3.53  |
| 3022      | <i>Adnp</i> <sup>+/-</sup> | NAP       | Male   | 18.00 | 11.08 | 6.20  | 24.17   | 18.60 | 5.55  | 17.12  | 1.84  | 4.16  |
| 3017      | <i>Adnp</i> <sup>+/-</sup> | NAP       | Male   | 4.48  | 11.52 | 9.80  | 20.88   | 9.64  | 5.76  | 18.68  | 9.08  | 12.32 |
| 3065      | <i>Adnp</i> <sup>+/-</sup> | NAP       | Male   | 21.16 | 12.96 | 13.96 | 16.64   | 12.28 | 15.35 | 17.74  | 9.48  | 7.16  |
| 3067      | <i>Adnp</i> <sup>+/-</sup> | NAP       | Male   | 2.80  | 0.00  | 9.40  | 24.08   | 0.00  | 2.36  | 7.28   | 5.52  | 2.24  |
| 2964      | <i>Adnp</i> <sup>+/-</sup> | NAP       | Female | 31.36 | 18.24 | 14.80 | 30.28   | 18.04 | 0.76  | 10.28  | 1.36  | 1.16  |
| 2965      | <i>Adnp</i> <sup>+/-</sup> | NAP       | Female | 23.32 | 15.20 | 11.76 | 31.80   | 5.44  | 3.68  | 44.48  | 6.48  | 0.00  |

| Mouse No. | Genotype                   | Treatment | Sex    | Water |       |       | Vanilla |       |       | Almond |       |       |
|-----------|----------------------------|-----------|--------|-------|-------|-------|---------|-------|-------|--------|-------|-------|
|           |                            |           |        | 1     | 2     | 3     | 1       | 2     | 3     | 1      | 2     | 3     |
| 2967      | <i>Adnp</i> <sup>+/-</sup> | NAP       | Female | 21.44 | 5.36  | 8.48  | 0.00    | -     | 0.00  | 0.00   | 0.00  | 0.00  |
| 2987      | <i>Adnp</i> <sup>+/-</sup> | NAP       | Female | 12.32 | 26.88 | 27.08 | 30.92   | 25.56 | 12.97 | 17.28  | 13.28 | 8.48  |
| 2989      | <i>Adnp</i> <sup>+/-</sup> | NAP       | Female | 22.12 | 7.72  | 10.36 | 36.60   | 32.56 | 7.68  | 32.72  | 14.68 | 15.44 |
| 2976      | <i>Adnp</i> <sup>+/-</sup> | NAP       | Female | 26.72 | 15.84 | 0.00  | 43.04   | 0.00  | 0.00  | 0.00   | 0.00  | 0.00  |
| 2978      | <i>Adnp</i> <sup>+/-</sup> | NAP       | Female | 70.76 | 55.20 | 11.56 | 16.16   | 15.04 | 9.86  | 31.62  | 31.60 | 0.97  |
| 2979      | <i>Adnp</i> <sup>+/-</sup> | NAP       | Female | 9.20  | 9.16  | 0.92  | 4.80    | 0.00  | 0.00  | 0.44   | 0.04  | 3.64  |
| 2997      | <i>Adnp</i> <sup>+/-</sup> | NAP       | Female | 27.56 | 23.44 | 26.04 | 30.12   | 11.88 | 14.76 | 18.08  | 25.60 | 16.08 |
| 2998      | <i>Adnp</i> <sup>+/-</sup> | NAP       | Female | 11.60 | 13.32 | 33.80 | 38.76   | 17.24 | 5.90  | 46.36  | 14.08 | 16.79 |
| 3000      | <i>Adnp</i> <sup>+/-</sup> | NAP       | Female | 19.48 | 17.88 | 11.24 | 21.92   | 19.20 | 1.88  | 7.20   | 3.32  | 15.00 |
| 3057      | <i>Adnp</i> <sup>+/-</sup> | NAP       | Female | 26.36 | 22.96 | 80.76 | 48.32   | 33.68 | 56.04 | 9.84   | 1.12  | 3.68  |
| 3072      | <i>Adnp</i> <sup>+/-</sup> | NAP       | Female | 7.76  | 2.76  | 7.00  | 18.48   | 10.56 | 9.36  | 22.24  | 11.28 | 33.60 |
| 3075      | <i>Adnp</i> <sup>+/-</sup> | NAP       | Female | 19.00 | 27.68 | 23.20 | 29.72   | 11.44 | 10.96 | 21.48  | 24.68 | 11.48 |
| 3148      | <i>Adnp</i> <sup>+/-</sup> | NAP       | Female | 33.92 | 0.00  | 0.28  | 47.52   | 0.32  | 9.20  | 1.44   | 7.00  | 0.08  |

## **References:**

1. Korenkova V, Scott J, Novosadova V, Jindrichova M, Langerova L, Svec D, Sidova M, and Sjoback R. Pre-amplification in the context of high-throughput qPCR gene expression experiment. *BMC Mol Biol.* 2015;16(5).
2. Szklarczyk D, Morris JH, Cook H, Kuhn M, Wyder S, Simonovic M, Santos A, Doncheva NT, Roth A, Bork P, et al. The STRING database in 2017: quality-controlled protein-protein association networks, made broadly accessible. *Nucleic acids research.* 2017;45(D1):D362-D8.
3. McKinney RA, Capogna M, Durr R, Gahwiler BH, and Thompson SM. Miniature synaptic events maintain dendritic spines via AMPA receptor activation. *Nature neuroscience.* 1999;2(1):44-9.
4. McKinney RA. Excitatory amino acid involvement in dendritic spine formation, maintenance and remodelling. *The Journal of physiology.* 2010;588(Pt 1):107-16.
5. Shu W, Cho JY, Jiang Y, Zhang M, Weisz D, Elder GA, Schmeidler J, De Gasperi R, Sosa MA, Rabidou D, et al. Altered ultrasonic vocalization in mice with a disruption in the Foxp2 gene. *Proceedings of the National Academy of Sciences of the United States of America.* 2005;102(27):9643-8.
6. Gaub S, Groszer M, Fisher SE, and Ehret G. The structure of innate vocalizations in Foxp2-deficient mouse pups. *Genes Brain Behav.* 2010;9(4):390-401.
7. Brennan JF, Santucci D, Branchi I, and Alleva E. Ultrasonic vocalizations elicit orienting and associative reactions in preweanling mice. *Acta Neurobiol Exp (Wars).* 1999;59(1):23-30.

8. Bowers JM, Perez-Pouchoulen M, Edwards NS, and McCarthy MM. Foxp2 mediates sex differences in ultrasonic vocalization by rat pups and directs order of maternal retrieval. *J Neurosci*. 2013;33(8):3276-83.
9. Gozes I. Neuropeptide Techniques. *Humana Press*. 2008;39(
10. Bassan M, Zamostiano R, Davidson A, Pinhasov A, Giladi E, Perl O, Bassan H, Blat C, Gibney G, Glazner G, et al. Complete sequence of a novel protein containing a femtomolar-activity-dependent neuroprotective peptide. *Journal of neurochemistry*. 1999;72(3):1283-93.
11. Rotstein M, Bassan H, Kariv N, Speiser Z, Harel S, and Gozes I. NAP enhances neurodevelopment of newborn apolipoprotein E-deficient mice subjected to hypoxia. *The Journal of pharmacology and experimental therapeutics*. 2006;319(1):332-9.
